# Supplementary material for: BolTLP1, a Thaumatin-like Protein Gene, Confers Tolerance to Salt and Drought Stresses in Broccoli (Brassica oleracea L. var. Italica)
Source: MDPI journal article supplement (doi:10.3390/ijms222011132), 2021-10-15
Supplement: s1 [file s1]

**Supplementary Table S4.** Proteins interacting with bolTLP screened by yeast two-hybrid assay.

| <b>Accession Number</b> | <b>Gene Symbol</b>  | <b>Functional Annotation</b>                                                               | <b>No. of Clones</b> |
|-------------------------|---------------------|--------------------------------------------------------------------------------------------|----------------------|
| AT2G21620               | RD2                 | Response to desiccation                                                                    | 68                   |
| AT5G25610               | RD22                | Response to desiccation                                                                    | 31                   |
| AT3G14080               | LSM1B               | Small nuclear ribonucleoprotein family protein                                             | 22                   |
| AT3G47520               | MDH                 | Protein with NAD-dependent malate dehydrogenase activity                                   | 19                   |
| AT1G43170               | RP1                 | Ribosomal protein 1                                                                        | 16                   |
| AT2G42400               | VOZ2                | VOZ transcription factor which acts as positive regulator of several salt-responsive genes | 16                   |
| AT3G27810               | MYB21               | R2R3-MYB transcription factor gene family                                                  | 13                   |
| AT1G72010               | Unreported          | TCP family transcription factor                                                            | 12                   |
| AT3G57790               | Pectin lyase-like 1 | Pectin lyase-like superfamily protein                                                      | 11                   |
| AT1G02410               | COX11               | Cytochrome c oxidase 11 protein family                                                     | 11                   |
| AT5G11790               | NDL2                | N-MYC downregulated-like 2                                                                 | 10                   |
| AT3G01015               | TPX2                | TPX2 protein family                                                                        | 9                    |
| AT2G28590               | Protein kinase 5b   | Protein kinase superfamily protein                                                         | 9                    |
| AT5G22790               | RER1                | Reticulata-related 1                                                                       | 7                    |
| AT3G13800               | Unknown             | Metallo-hydrolase/oxidoreductase                                                           | 4                    |
| AT5G16760               | ITPK1               | Inositol 1,3,4-trisphosphate 5/6-kinase                                                    | 2                    |
| AT1G26650               | Unreported          | Son of sevenless protein                                                                   | 2                    |
| AT2G35240               | MORF6               | Member of MORF family                                                                      | 2                    |
| AT4G17510               | UCH3                | Ubiquitin C-terminal hydrolase 3                                                           | 1                    |
| AT5G01010               | Unreported          | Retinal-binding protein                                                                    | 1                    |
| Total                   |                     |                                                                                            | 266                  |
