# Supplementary material for: BolTLP1, a Thaumatin-like Protein Gene, Confers Tolerance to Salt and Drought Stresses in Broccoli (Brassica oleracea L. var. Italica)
Source: MDPI journal article supplement (doi:10.3390/ijms222011132), 2021-10-15
Supplement: s1 [file s1]

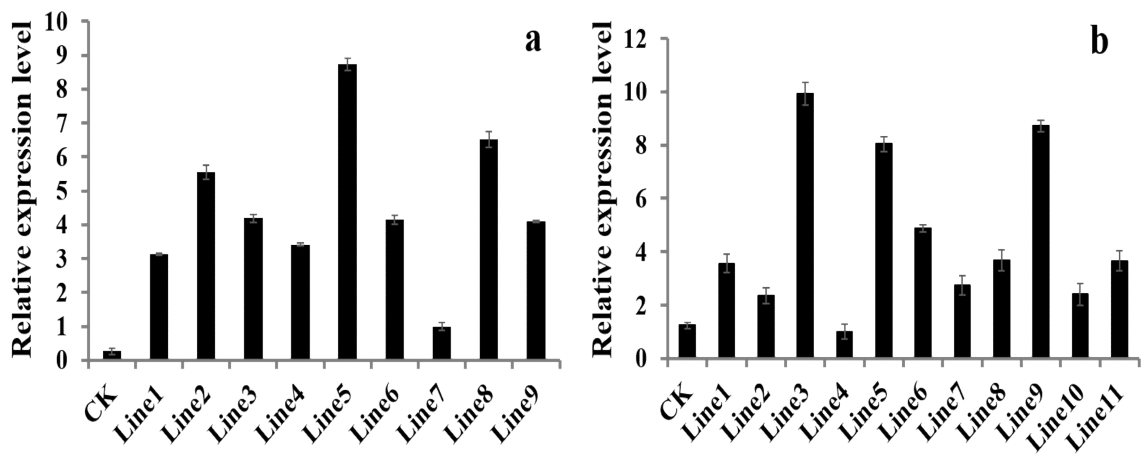

**Supplementary Figure S1** Expression levels of *bolTLP1* in *bolTLP1* overexpressing transgenic *Arabidopsis* (a) and broccoli (b). CK in (a) and (b) indicated the vector control plants. Line1-9 in (a) indicated the representative independent *35S::bolTLP1* transgenic *Arabidopsis* lines. Line1-11 in (b) indicated the representative independent *35S::bolTLP1* transgenic broccoli lines.
