# Supplementary material for: BolTLP1, a Thaumatin-like Protein Gene, Confers Tolerance to Salt and Drought Stresses in Broccoli (Brassica oleracea L. var. Italica)
Source: MDPI journal article supplement (doi:10.3390/ijms222011132), 2021-10-15
Supplement: s1 [file s1]

**Supplementary Table S5.** Primers used in the study.

| Primes                                                                               |              | Sequences (5'-3')                                 |
|--------------------------------------------------------------------------------------|--------------|---------------------------------------------------|
| <i>BolTLP1</i> ( full coding sequences)                                              |              | bolTLP1-F:ATGATTTATCAAAAAACACTTCTCACA             |
|                                                                                      |              | bolTLP1-R:TCACGGACAGAAAATGACATTGTAG               |
| <i>BolTLP1</i> with restriction enzyme sites (for construction of expression vector) |              | Nco I-bolTLP1-F: <u>GCCCATGG</u> CTTGATTAGTTTC    |
|                                                                                      |              | Bst EII-bolTLP1-R: <u>GGTCACCG</u> ATAATCACACTTCC |
| <i>BolTLP1</i> with restriction enzyme sites (for construction of bait vector)       |              | BD-bolTLP1-F: <u>CCATGG</u> ATGATTATCAAAAAACAC    |
|                                                                                      |              | BD-bolTLP1-R:GGATCCTCACGGACAGAAAATG               |
| <i>BolTLP1</i> with restriction enzyme sites (for construction of prey vector)       |              | AD-bolTLP1-F:GGATCCATGATTATCAAAAAACAC             |
|                                                                                      |              | AD-bolTLP1-R:GAGCTCTCACGGACAGAAAATG               |
| Primes used in construction of bait vector                                           | <i>LSM1B</i> | F: <u>CATATG</u> ATGTCGTTGGGCTGGTCCT              |
|                                                                                      |              | R: <u>GTCGAC</u> TAAATCGAAGTCAAGAACTCCATT         |
|                                                                                      | <i>RD2</i>   | F: <u>CATATG</u> ATGTCTCTAACCCTAAAAATCTC          |
|                                                                                      |              | R: <u>GTCGAC</u> CTACTGGACGCCG                    |
|                                                                                      | <i>VOZ2</i>  | F: <u>CATATG</u> ATGGGATGCTTCGG                   |
|                                                                                      |              | R: <u>GTCGAC</u> TAAATTTGCTTGCTGCTG               |
|                                                                                      | <i>RD22</i>  | F: <u>CATATG</u> ATGGCGGCTTGTCTTCCAT              |
|                                                                                      |              | R: <u>GTCGAC</u> CTAGTAGCTGAACCAAACAACATGG        |
|                                                                                      | <i>MDH</i>   | F: <u>CATATG</u> ATGGCAACAGCAACATCAGC             |
|                                                                                      |              | R: <u>GTCGAC</u> CTAGTTAGCTGCTGCAGCAGCT           |
| Universal primers                                                                    | <i>T7</i>    | F: TAATACGACTCACTATAGGGCCA                        |
|                                                                                      | <i>3'BD</i>  | R: AAAAGCAAAATTTTGGATTCTCA                        |
|                                                                                      | <i>3'AD</i>  | R: CACTTGAACGCCCCAAAAAGTCATAG                     |
|                                                                                      | <i>35S</i>   | F: AACAGAACTCGCCGTAAAG                            |
|                                                                                      | <i>NOS</i>   | R: TTGCGGGACTCTAATCATAAAAC                        |

|                        | Genes                               | sequences (5'-3')                           |
|------------------------|-------------------------------------|---------------------------------------------|
| Primes used in qRT-PCR | <i>bolTLP1</i>                      | <i>qbolTLP1</i> -F:CGGTGTTGAAGACGGAGGAA     |
|                        |                                     | <i>qbolTLP1</i> -R:CCAGTCTCTTGATAATCACAC    |
|                        | <i>jacalin-related lectin 35</i>    | 106295110-F:TGGCGAAAAAGTTGGATGCTCA          |
|                        |                                     | 106295110-R:CACGGATGTGATGTAATCTTCTGGA       |
|                        | <i>PYL9</i>                         | 106298389-F:CCCCTGTTTCATCTCGTTTGGTCT        |
|                        |                                     | 106298389-R:ATCACCTTTCATCACACACCTGCTG       |
|                        | <i>ERF13</i>                        | 106298736-F:CCACTTCCTCATCGTCACTGTCTCA       |
|                        |                                     | 106298736-R:TTCTTGTCTTTTGATTTGGTGCCCT       |
|                        | <i>ERF11</i>                        | 106301710-F:CGGAATCAAAGAAACCCGTTACAG        |
|                        |                                     | 106301710-R:GCTCTCGTTGTTGTCGACCATGTA        |
|                        | <i>adenylyl-sulfate kinase 2</i>    | 106302172-F:AGCGACTGCCTCTAAGTGACGGTT        |
|                        |                                     | 106302172-R:CGGAGATCGGATGTAAAGAAGCAG        |
|                        | <i>IAA9</i>                         | 106313751-F:AGATGACAAAGCCACTATCAGCCTC       |
|                        |                                     | 106313751-R:TGGTAGGAAGCAAAGGAAAGAAGG        |
|                        | <i>HVA22-like</i>                   | 106333342-F:CTGTGGTGATGCTGCTTTAT            |
|                        |                                     | 106333342-R:TGTTCCCTCACGACTCTGTT            |
|                        | <i>DrTI</i>                         | 106319958-F:GAAGAGGTGAAGGACTACAACGGAA       |
|                        |                                     | 106319958-R:TGATGCCAAGTGGACAAAAAAGTA        |
|                        | <i>glutathione S-transferase T3</i> | 106319962-F:GAGTACTGAACAAAAGGTGGTGCC        |
|                        |                                     | 106319962-R:ACCAAATCATTGATCCTAGCCCAT        |
|                        | <i>heat shock protein 90</i>        | 106322283-F:GTGAGAGCAAGAAGGCTGTGGA          |
|                        |                                     | 106322283-R:GGACTCTTCCAGTTTCAGACCCTC        |
|                        | <i>WRKY 40</i>                      | 106327894-F:ATGCGAGTTGAAGAAGATTCCACG        |
|                        |                                     | 106327894-R:AGGACTGACTTGGTCTCTCTCGGTA       |
|                        | <i>autophagy-related protein 8e</i> | 106335452-F:AAGCGTGACAACGATTACGAAAAGA       |
|                        |                                     | 106335452-R:TCTCAGCCTTTTCCACAATCACC         |
|                        | <i>ABA 8'-hydroxylase 2</i>         | 106336684-F:TTGCTAGTGGTGTTCCTTCAATGGC       |
|                        |                                     | 106336684-R:TAGGGTTCTCTGTGTAGAGGCGGA        |
|                        | <i>osmotin-like protein</i>         | 106337582-F:TGCTCCCACTACAACGAAAATTC         |
|                        |                                     | 10.997606337582-R:CGAGAGAGACACCGTAGGAGGATAA |
|                        | <i>defensin-like protein 197</i>    | 106339924-F:TAGCATTGTTTCATCTTCTTCCTCGC      |
|                        |                                     | 106339924-R:GCCTTTAGCACCTTGAAACTCCTG        |
|                        | <i>PYL4</i>                         | 106342302-F:TAGGAGCCGACGAGAAGTTCAAAT        |
|                        |                                     | 106342302-R:TTCTTCTCGCATTTACCGCCTTT         |
|                        | <i>LSM1B</i>                        | 103870068-F: CTGGTCCTGAAGATATTACC           |
|                        |                                     | 103870068-R: TCCACGGATTACATAGAGGC           |
|                        | <i>RD2</i>                          | <i>RD2</i> -F:GGTCCCAACAGCAAACACGC          |
|                        |                                     | <i>RD2</i> -R:CAGCCGCAGGCTTCAATCTC          |
|                        | <i>RD22</i>                         | 103837093-F:GTCTCCGCCATCTCTTTACGCC          |

|  |              |                                            |
|--|--------------|--------------------------------------------|
|  |              | 103837093-R: TGTTCCTTACCCTTGCCAGTGTC       |
|  | <i>MDH</i>   | 114620-F: CCGTAACGAAAGCACAAACA             |
|  |              | 114620-R: AAGGACCAGTGAAATCACGAAC           |
|  | <i>VOZ2</i>  | 106336717-F: GTTCCCGACGAGTCTGAGTT          |
|  |              | 106336717-R: CTAATCCCGCCTGGTCTTAA          |
|  | <i>Actin</i> | <i>BolActin</i> -F: GCTCCTCTTAACCCAAAGGC   |
|  |              | <i>BolActin</i> -R: CACACCATCACCAGAATCCAGC |
|  |              | <i>AtActin</i> -F: GGTAACATTGTGCTCAGTGGTGG |
|  |              | <i>AtActin</i> -R: AACGACCTTAATCTTCATGCTGC |

Notice: The underlines indicated the restriction enzyme sites. CK indicated the vector controls. OE indicated bolTLP1 overexpressing transgenic lines.
