# Supplementary material for: BolTLP1, a Thaumatin-like Protein Gene, Confers Tolerance to Salt and Drought Stresses in Broccoli (Brassica oleracea L. var. Italica)
Source: Int J Mol Sci. 2021 Oct 15;22(20):11132. doi: 10.3390/ijms222011132 (PMC8537552; doi:10.3390/ijms222011132)
Supplement: Supplementary file 1 [file ijms-22-11132-s001.zip]

Archive with 7 entries (7 files):
- Supplementary files/Supplementary Fig. S1.pdf
- Supplementary files/Supplementary Table S1.xlsx
- Supplementary files/Supplementary Table S2.xlsx
- Supplementary files/Supplementary Table S3.xlsx
- Supplementary files/Supplementary Table S4.pdf
- Supplementary files/Supplementary Table S5.pdf
- Supplementary files/Supplementary Table S6.xlsx
