# Supplementary material for: BolTLP1, a Thaumatin-like Protein Gene, Confers Tolerance to Salt and Drought Stresses in Broccoli (Brassica oleracea L. var. Italica)
Source: Int J Mol Sci. 2021 Oct 15;22(20):11132. doi: 10.3390/ijms222011132 (PMC8537552; doi:10.3390/ijms222011132)
Supplement: Supplementary file 1 [file ijms-22-11132-s001.zip › Supplementary files/Supplementary Table S1.xlsx]

## Sheet: DEGs-total
Supplementary Table S1 Differentially expressed genes detected between the 35S::bolTLP1 borccoli and the vector controls.
	Normalized expression level
Gene ID	Vector controls(CK)	Overexpressed bolTLP1 broccooli (35S::bolTLP1)	log2FoldChange(35S::bolTLP1/CK)	FDR	Up/Down-Regulation(35S::bolTLP1/CK)	P value	Function annoation
LOC106320035	0.01	40.55	11.9855	2.72e-138	Up	2.18e-140	hypothetica l protein CARUB_v10005804mg, partial [Capsella rubella]
LOC106321594	0.01	22.95	11.1643	1.9e-91	Up	2.37e-93	beta-amylase 5 [Brassica oleracea var. oleracea]
LOC106313751	0.01	20.83	11.0244	1.97e-105	Up	2.1e-107	auxin-responsive protein IAA9 isoform X1 [Brassica oleracea var. oleracea]
LOC106306751	0.01	13.05	10.3498	2.06e-20	Up	1.19e-21	uncharacterized protein LOC106306751 isoform X2 [Brassica oleracea var. oleracea]
LOC106299714	0.01	6.92	9.43463	8.02e-10	Up	9.46e-11	uncharacterized protein LOC106299714 [Brassica oleracea var. oleracea]
LOC106317310	0.01	6.33	9.30606	3.59e-18	Up	2.35e-19	CDY58178.1|//BnaCnng32780D [Brassica napus]
LOC106343526	0.01	5.38	9.07146	8.23e-07	Up	1.35e-07	uncharacterized protein LOC106343526 [Brassica oleracea var. oleracea]
LOC106322423	0.01	5.17	9.01402	0.000397912	Up	9.98e-05	unknown protein
LOC106308156	0.01	5.06	8.98299	8.72e-24	Up	4.32e-25	NF-kappa-B-activating protein-like [Brassica oleracea var. oleracea]
LOC106331605	0.01	4.93	8.94544	5.37e-30	Up	2.12e-31	cytochrome P450 82G1 [Brassica oleracea var. oleracea]
LOC106333852	0.01	4.71	8.87958	6.28e-11	Up	6.74e-12	uncharacterized protein LOC106333852 [Brassica oleracea var. oleracea]
LOC106323043	0.01	4.56	8.83289	8.01e-10	Up	9.46e-11	unknown protein {Brassica napus]
LOC106325408	0.01	4.5	8.81378	1.54e-14	Up	1.26e-15	uncharacterized protein LOC106325408, partial [Brassica oleracea var. oleracea]
LOC106303491	0.01	4.31	8.75154	7.23e-13	Up	6.62e-14	uncharacterized protein LOC106303491 [Brassica oleracea var. oleracea]
LOC106322228	0.01	4.29	8.74483	6.68e-08	Up	9.63e-09	uncharacterized protein LOC106322228, partial [Brassica oleracea var. oleracea]
LOC106295713	0.01	4.24	8.72792	2.72e-19	Up	1.68e-20	F-box protein At1g30790-like [Brassica oleracea var. oleracea]
LOC106303422	0.01	4.2	8.71425	3.56e-08	Up	4.98e-09	uncharacterized protein LOC106303422 [Brassica oleracea var. oleracea]
LOC106293279	0.01	4.04	8.65821	4.28e-15	Up	3.36e-16	DNA-directed RNA polymerase II subunit 4-like [Brassica oleracea var. oleracea]
LOC106319962	0.01	3.62	8.49985	2.26e-10	Up	2.53e-11	glutathione S-transferase T3-like [Brassica oleracea var. oleracea]
LOC106340522	0.01	3.52	8.45943	3.93e-20	Up	2.31e-21	polycomb group protein FERTILIZATION-INDEPENDENT SEED 2-like [Brassica oleracea var. oleracea]
LOC106333751	0.01	3.44	8.42627	4.4e-07	Up	6.98e-08	F-box/kelch-repeat protein At4g38940-like [Brassica oleracea var. oleracea]
LOC106313908	0.01	3.21	8.32643	4.25e-10	Up	4.89e-11	dof zinc finger protein DOF5.8-like [Brassica oleracea var. oleracea]
LOC106295230	0.01	3.14	8.29462	1.51e-09	Up	1.83e-10	uncharacterized protein LOC106295230 [Brassica oleracea var. oleracea]
LOC106322267	0.01	3	8.22882	0.000398144	Up	9.98e-05	uncharacterized protein At1g24000-like [Brassica oleracea var. oleracea]
LOC106296898	0.01	2.91	8.18487	5.38e-09	Up	6.86e-10	nuclear transcription factor Y subunit C-2 [Brassica oleracea var. oleracea]
LOC106321742	0.01	2.91	8.18487	1.01e-08	Up	1.33e-09	endogenous alpha-amylase/subtilisin inhibitor-like [Brassica oleracea var. oleracea]
LOC106310472	0.01	2.88	8.16992	3.59e-18	Up	2.35e-19	myrosinase-like [Brassica oleracea var. oleracea]
LOC106321941	0.01	2.79	8.12412	0.000216019	Up	5.15e-05	uncharacterized protein LOC106321941, partial [Brassica oleracea var. oleracea]
LOC106326151	0.01	2.64	8.04439	5.38e-09	Up	6.86e-10	uncharacterized protein LOC106326151 [Brassica oleracea var. oleracea]
LOC106316733	0.01	2.6	8.02237	2.97e-21	Up	1.65e-22	putative F-box protein At4g38870 [Brassica oleracea var. oleracea]
LOC106310730	0.01	2.57	8.00563	8.02e-10	Up	9.46e-11	calcium uniporter protein 6, mitochondrial-like [Brassica oleracea var. oleracea]
LOC106335566	0.01	2.54	7.98869	2.26e-10	Up	2.53e-11	uncharacterized protein LOC106335566 [Brassica oleracea var. oleracea]
LOC106324019	0.01	2.37	7.88874	1.85e-05	Up	3.67e-06	neuromodulin-like [Brassica oleracea var. oleracea]
LOC106334274	0.01	2.37	7.88874	1.18e-15	Up	8.97e-17	F-box protein SKIP17-like isoform X2 [Brassica oleracea var. oleracea]
LOC106299427	0.01	2.37	7.88874	3.42e-05	Up	7.11e-06	uncharacterized protein LOC106324466 [Brassica oleracea var. oleracea]
LOC106332946	0.19	44.43	7.86939	1.09e-138	Up	8.74e-141	CDX81014.1|//BnaC03g02680D [Brassica napus]
LOC106334507	0.01	2.23	7.8009	1.19e-10	Up	1.3e-11	replication protein A 70 kDa DNA-binding subunit A-like [Brassica napus]
LOC106295280	0.01	2.19	7.77479	5.38e-09	Up	6.86e-10	delta-9 desaturase-like 5 protein [Brassica oleracea var. oleracea]
LOC106297759	0.01	2.17	7.76155	7.23e-13	Up	6.62e-14	UPF0481 protein At3g47200-like [Brassica oleracea var. oleracea]
LOC106310288	0.11	22.97	7.7061	9.51e-64	Up	1.76e-65	pentatricopeptide repeat-containing protein At1g02370, mitochondrial-like [Brassica oleracea var. oleracea]
LOC106297345	0.01	2.07	7.69349	0.00073273	Up	0.000193075	phosphoenolpyruvate carboxylase 1-like [Brassica oleracea var. oleracea]
LOC106295541	0.01	2.01	7.65105	1.76e-11	Up	1.8e-12	venom phosphodiesterase 2-like [Brassica oleracea var. oleracea]
LOC106293552	0.01	1.97	7.62205	1.51e-09	Up	1.83e-10	uncharacterized protein LOC106293552 [Brassica oleracea var. oleracea]
LOC106316697	0.01	1.81	7.49985	1.9e-08	Up	2.57e-09	short-chain dehydrogenase TIC 32, chloroplastic [Brassica oleracea var. oleracea]
LOC106326212	0.01	1.75	7.45121	3.42e-05	Up	7.11e-06	uncharacterized protein LOC106326212 [Brassica oleracea var. oleracea]
LOC106338409	0.01	1.74	7.44294	0.000216045	Up	5.15e-05	uncharacterized protein At3g43530-like [Brassica napus]
LOC106295448	0.01	1.67	7.3837	6.69e-08	Up	9.63e-09	U-box domain-containing protein 4-like [Brassica oleracea var. oleracea]
LOC106310800	0.01	1.66	7.37504	1.54e-06	Up	2.62e-07	transcription factor MYB34-like [Brassica oleracea var. oleracea]
LOC106315875	0.01	1.65	7.36632	6.29e-11	Up	6.74e-12	probable membrane-associated kinase regulator 2 [Brassica oleracea var. oleracea]
LOC106328632	0.06	9.87	7.36194	4.85e-51	Up	1.15e-52	(R,S)-reticuline 7-O-methyltransferase-like [Brassica oleracea var. oleracea]
LOC106316022	0.01	1.64	7.35755	3.56e-08	Up	4.98e-09	rhomboid-like protein 14, mitochondrial isoform X7 [Brassica oleracea var. oleracea]
LOC106313295	0.01	1.62	7.33985	1.26e-07	Up	1.86e-08	respiratory burst oxidase homolog protein C-like [Brassica oleracea var. oleracea]
LOC106304445	0.01	1.6	7.32193	0.000398098	Up	9.98e-05	uncharacterized protein LOC106304445 [Brassica oleracea var. oleracea]
LOC106338408	0.01	1.59	7.31288	0.000398237	Up	9.98e-05	uncharacterized protein At3g43530-like [Brassica napus]
LOC106305339	0.01	1.58	7.30378	5.35e-06	Up	9.8e-07	uncharacterized protein LOC106423306 [Brassica napus]
LOC106307030	0.01	1.57	7.29462	5.35e-06	Up	9.8e-07	uncharacterized protein LOC106307030 [Brassica oleracea var. oleracea]
LOC106320988	0.18	27.99	7.28077	1.86e-300	Up	5.64e-303	lipoxygenase 2, chloroplastic-like [Brassica oleracea var. oleracea]
LOC106314869	0.01	1.51	7.23841	8.01e-10	Up	9.46e-11	uncharacterized protein LOC106314869 [Brassica oleracea var. oleracea]
LOC106293789	0.01	1.49	7.21917	2.35e-07	Up	3.61e-08	transcription factor bHLH95-like [Brassica oleracea var. oleracea]
LOC106332232	0.1	14.83	7.21237	6.46e-90	Up	8.19e-92	alanine--glyoxylate aminotransferase 2 homolog 3, mitochondrial [Brassica oleracea var. oleracea]
LOC106332729	0.01	1.48	7.20945	1.85e-05	Up	3.67e-06	putative E3 ubiquitin-protein ligase XBAT34 isoform X2 [Brassica oleracea var. oleracea];gi|922444903|ref|XP_013626672.1|//PREDICTED: putative E3 ubiquitin-protein ligase XBAT34 isoform X1 [Brassica oleracea var. oleracea]
LOC106300607	0.98	144.41	7.20317	0	Up	0	lipoxygenase 2, chloroplastic-like [Brassica oleracea var. oleracea]
LOC106334518	0.01	1.47	7.19967	1.19e-10	Up	1.3e-11	reticuline oxidase-like protein [Brassica oleracea var. oleracea]
LOC106340598	0.01	1.41	7.13955	1.9e-08	Up	2.57e-09	beta-glucosidase 32-like [Brassica oleracea var. oleracea]
LOC106319723	0.01	1.41	7.13955	0.000116972	Up	2.66e-05	glutathione S-transferase T3-like [Brassica oleracea var. oleracea]
LOC106337632	0.15	21.01	7.12997	3.63e-112	Up	3.66e-114	nucleolin 1-like [Brassica oleracea var. oleracea]
LOC106331522	0.01	1.39	7.11894	3.42e-05	Up	7.11e-06	glutathione S-transferase T2-like [Brassica oleracea var. oleracea]
LOC106341816	0.01	1.38	7.10852	5.38e-09	Up	6.86e-10	beta-glucosidase 32-like [Brassica oleracea var. oleracea]
LOC106337255	0.01	1.34	7.06609	0.000733136	Up	0.000193075	embryonic protein DC-8-like [Brassica oleracea var. oleracea]
LOC106293410	0.01	1.33	7.05528	3.42e-05	Up	7.11e-06	prolyl 4-hydroxylase 5-like isoform X1 [Brassica oleracea var. oleracea]
LOC106309942	0.01	1.32	7.04439	5.35e-06	Up	9.8e-07	putative protease Do-like 14 isoform X2 [Brassica napus]
LOC106299987	0.01	1.31	7.03342	2.35e-07	Up	3.61e-08	probable arabinosyltransferase ARAD1 [Brassica oleracea var. oleracea]
LOC106293748	0.01	1.29	7.01123	0.000216151	Up	5.15e-05	probable WRKY transcription factor 20 [Brassica oleracea var. oleracea]
LOC106325318	0.01	1.26	6.97728	5.35e-06	Up	9.8e-07	myb-related protein Myb4-like [Brassica oleracea var. oleracea]
LOC106317392	0.01	1.22	6.93074	0.00039819	Up	9.98e-05	uncharacterized protein LOC106317392 [Brassica oleracea var. oleracea]
LOC106314910	0.01	1.2	6.90689	6.33e-05	Up	1.38e-05	flavone 3'-O-methyltransferase 1-like [Brassica oleracea var. oleracea]
LOC106321804	0.01	1.19	6.89482	0.000216124	Up	5.15e-05	tRNA (guanine(10)-N2)-methyltransferase homolog, partial [Brassica oleracea var. oleracea]
LOC106304902	0.01	1.11	6.79442	3.42e-05	Up	7.11e-06	MADS-box transcription factor 23-like isoform X2 [Brassica napus]
LOC106308856	0.01	1.1	6.78136	0.000216098	Up	5.15e-05	uncharacterized protein LOC106308856 [Brassica oleracea var. oleracea]
LOC106326442	0.01	1.07	6.74147	1.84e-05	Up	3.67e-06	cytochrome P450 71B2-like isoform X1 [Brassica oleracea var. oleracea]
LOC106312771	0.01	1.04	6.70044	1.85e-05	Up	3.67e-06	transcription factor PIF6 isoform X3 [Brassica oleracea var. oleracea]
LOC106320597	0.01	1.03	6.6865	0.000116957	Up	2.66e-05	probable carboxylesterase 13 [Brassica oleracea var. oleracea]
LOC106298488	0.01	1.02	6.67242	0.000116987	Up	2.66e-05	abscisic acid receptor PYL8 [Brassica oleracea var. oleracea]
LOC106344864	0.01	1.01	6.65821	1.54e-14	Up	1.26e-15	uncharacterized protein LOC106344864 [Brassica oleracea var. oleracea]
LOC106298401	0.08	7.85	6.61655	1.57e-46	Up	4.08e-48	cytochrome P450 81F1-like [Brassica oleracea var. oleracea]
LOC106298705	0.01	0.98	6.61471	3.42e-05	Up	7.11e-06	gibberellin 20 oxidase 4 [Brassica oleracea var. oleracea]
LOC106321232	0.16	15.56	6.60363	6.5e-59	Up	1.31e-60	lipoxygenase 2, chloroplastic-like [Brassica napus]
LOC106321402	0.54	46.64	6.43246	5.73e-150	Up	4.22e-152	lipoxygenase 2, chloroplastic-like [Brassica napus]
LOC106325735	0.13	11.22	6.43142	1.41e-73	Up	2.2e-75	uncharacterized protein LOC106325735 [Brassica oleracea var. oleracea]
LOC106313481	0.01	0.86	6.42626	1.84e-05	Up	3.67e-06	glutamate decarboxylase 1-like [Brassica oleracea var. oleracea]
LOC106308722	0.01	0.81	6.33985	0.000398051	Up	9.98e-05	uncharacterized protein LOC106308722 [Brassica oleracea var. oleracea]
LOC106342154	0.01	0.8	6.32193	0.000216177	Up	5.15e-05	pyruvate kinase, cytosolic isozyme-like [Brassica oleracea var. oleracea]
LOC106314284	0.01	0.8	6.32193	0.000216072	Up	5.15e-05	uncharacterized protein LOC106314284 [Brassica oleracea var. oleracea]
LOC106293216	0.01	0.77	6.26679	0.000397959	Up	9.98e-05	uncharacterized protein LOC106293216 [Brassica oleracea var. oleracea]
LOC106292913	0.06	4.54	6.24159	1.84e-22	Up	9.61e-24	GDSL esterase/lipase ESM1-like [Brassica oleracea var. oleracea]
LOC106300760	0.01	0.75	6.22882	0.000117002	Up	2.66e-05	uncharacterized protein LOC106300760 [Brassica oleracea var. oleracea]
LOC106314192	0.1	7.48	6.22497	2.33e-21	Up	1.29e-22	uncharacterized protein LOC106314192 [Brassica oleracea var. oleracea]
LOC106332474	0.16	11.95	6.22279	8.41e-44	Up	2.33e-45	uncharacterized protein LOC106332474 [Brassica oleracea var. oleracea]
LOC106293637	0.01	0.73	6.18982	0.000733054	Up	0.000193075	transcription factor LHW [Brassica oleracea var. oleracea]
LOC106311666	0.01	0.71	6.14975	6.33e-05	Up	1.38e-05	sugar transporter ERD6-like 4 [Brassica oleracea var. oleracea]
LOC106300956	0.03	2.11	6.13614	5.57e-20	Up	3.29e-21	uncharacterized protein LOC106320679 [Brassica oleracea var. oleracea]
LOC106330138	0.01	0.7	6.12928	2.86e-09	Up	3.54e-10	uncharacterized protein LOC106330138 [Brassica oleracea var. oleracea]
LOC106325144	0.01	0.65	6.02237	3.42e-05	Up	7.11e-06	pyruvate decarboxylase 4 [Brassica oleracea var. oleracea]
LOC106339145	0.01	0.62	5.9542	4.25e-10	Up	4.89e-11	TMV resistance protein N-like [Brassica oleracea var. oleracea]
LOC106295017	0.01	0.62	5.9542	0.000732973	Up	0.000193075	shaggy-related protein kinase gamma-like [Brassica oleracea var. oleracea]
LOC106313914	0.33	19.44	5.88042	3.87e-55	Up	8.47e-57	CDY17411.1|//BnaC09g21260D [Brassica napus]
LOC106329488	0.14	8.21	5.87388	8.59e-34	Up	3.07e-35	tubby-like F-box protein 7 isoform X2 [Brassica oleracea var. oleracea]
LOC106310026	0.01	0.58	5.85798	0.000398283	Up	9.98e-05	cytochrome P450 78A5-like [Brassica oleracea var. oleracea]
LOC106320621	0.01	0.58	5.85798	0.000732892	Up	0.000193075	uncharacterized protein LOC106320621 [Brassica oleracea var. oleracea]
LOC106330861	0.02	1.14	5.83289	1.31e-18	Up	8.39e-20	glycine-rich cell wall structural protein 1-like [Brassica napus]
LOC106323955	0.19	10.33	5.7647	4.98e-44	Up	1.37e-45	uncharacterized protein LOC106323955, partial [Brassica oleracea var. oleracea]
LOC106316318	0.01	0.54	5.75489	0.000732811	Up	0.000193075	protein DA1-related 3-like [Brassica oleracea var. oleracea]
LOC106296509	0.03	1.55	5.69116	3.74e-13	Up	3.35e-14	CDY33848.1|//BnaC06g05050D [Brassica napus]
LOC106321533	0.28	13.53	5.59459	1.01e-76	Up	1.5e-78	CDY04196.1|//BnaC06g26190D [Brassica napus]
LOC106344183	0.09	4.17	5.53398	1.08e-24	Up	5.13e-26	cytochrome P450 78A5 [Brassica oleracea var. oleracea]
LOC106331773	0.56	25.79	5.52524	3.93e-111	Up	4e-113	peroxidase 22-like [Brassica oleracea var. oleracea]
LOC106298490	0.08	3.64	5.50779	5.78e-14	Up	4.88e-15	putative peroxisomal acyl-coenzyme A oxidase 1.2 [Brassica oleracea var. oleracea]
LOC106330903	0.96	42.29	5.46114	2.99e-64	Up	5.48e-66	protein TIFY 5A-like [Brassica oleracea var. oleracea]
LOC106296209	0.11	4.69	5.41401	2.86e-11	Up	2.98e-12	actin-depolymerizing factor 9 [Brassica rapa]
LOC106340325	0.11	4.66	5.40475	1.83e-32	Up	6.79e-34	CDY40162.1|//BnaC04g13900D [Brassica napus]
LOC106307131	0.72	28.88	5.32593	2.02e-116	Up	1.94e-118	bark storage protein A-like [Brassica oleracea var. oleracea]
LOC106325468	0.01	0.4	5.32193	0.000117017	Up	2.66e-05	villin-5-like isoform X1 [Brassica oleracea var. oleracea]
LOC106295688	1.35	53.34	5.30419	2.16e-257	Up	8.2e-260	uncharacterized protein LOC106295688 [Brassica oleracea var. oleracea]
LOC106344373	0.01	0.39	5.2854	0.000732648	Up	0.000193075	vesicle-fusing ATPase-like [Brassica oleracea var. oleracea]
LOC106329472	0.16	5.62	5.13443	5.79e-37	Up	1.9e-38	uncharacterized protein LOC106329472 [Brassica oleracea var. oleracea]
LOC106294057	0.07	2.32	5.05063	3.9e-09	Up	4.89e-10	transcription factor MYB24 [Brassica oleracea var. oleracea]
LOC106293081	2.32	76.41	5.04157	2.25e-193	Up	1.24e-195	uncharacterized protein OsI_027940-like isoform X2 [Brassica napus]
LOC106305245	0.64	21.01	5.03686	3.06e-34	Up	1.08e-35	uncharacterized protein LOC106305245 [Brassica oleracea var. oleracea]
LOC106316721	0.05	1.63	5.0268	8.01e-08	Up	1.16e-08	tryptophan--tRNA ligase, cytoplasmic-like, partial [Brassica oleracea var. oleracea]
LOC106331549	1.31	41.78	4.99517	6.72e-115	Up	6.61e-117	21 kDa protein-like [Brassica oleracea var. oleracea]
LOC106327891	0.15	4.76	4.98793	4.14e-25	Up	1.94e-26	calcium-dependent protein kinase 12-like [Brassica oleracea var. oleracea]
LOC106343620	0.06	1.86	4.9542	8.01e-08	Up	1.16e-08	protein trichome birefringence-like 38 [Brassica oleracea var. oleracea]
LOC106309886	0.06	1.81	4.91488	2.66e-07	Up	4.11e-08	KDEL-tailed cysteine endopeptidase CEP2 [Brassica oleracea var. oleracea]
LOC106335851	0.06	1.76	4.87447	4.83e-07	Up	7.71e-08	protein SRG1-like [Brassica oleracea var. oleracea]
LOC106328164	0.09	2.56	4.83007	1.46e-07	Up	2.19e-08	glutathione S-transferase U9-like [Brassica napus]
LOC106300623	0.06	1.69	4.81592	4.83e-07	Up	7.71e-08	uncharacterized protein LOC106300623 [Brassica oleracea var. oleracea]
LOC106343659	0.35	9.64	4.78361	5.52e-54	Up	1.24e-55	non-specific phospholipase C3 [Brassica oleracea var. oleracea]
LOC106339534	0.05	1.31	4.7115	1.22e-13	Up	1.06e-14	serine/threonine-protein kinase KIPK [Brassica oleracea var. oleracea]
LOC106315188	0.31	7.99	4.68785	6.73e-34	Up	2.39e-35	F-box protein At1g30790-like [Brassica oleracea var. oleracea]
LOC106322283	7.84	201.55	4.68414	5.36e-276	Up	1.83e-278	heat shock protein 90-2 [Brassica napus]
LOC106323069	0.06	1.51	4.65344	9.3e-06	Up	1.77e-06	protein LIGHT-DEPENDENT SHORT HYPOCOTYLS 1 [Brassica oleracea var. oleracea]
LOC106325220	0.12	2.93	4.60979	1.82e-10	Up	2.03e-11	aquaporin NIP6-1 [Brassica oleracea var. oleracea]
LOC106329631	0.09	2.18	4.59826	1.59e-06	Up	2.71e-07	LOW QUALITY PROTEIN: SNAP25 homologous protein SNAP29 [Brassica oleracea var. oleracea]
LOC106337156	0.04	0.95	4.56986	2.99e-05	Up	6.14e-06	trans-cinnamate 4-monooxygenase-like [Brassica oleracea var. oleracea]
LOC106297280	0.07	1.65	4.55897	9.3e-06	Up	1.77e-06	uncharacterized protein LOC106297280 [Brassica oleracea var. oleracea]
LOC106340125	0.22	5.18	4.55738	4.25e-17	Up	2.97e-18	uncharacterized isomerase BH0283-like [Brassica oleracea var. oleracea]
LOC106340954	0.05	1.16	4.53605	1.67e-05	Up	3.3e-06	uncharacterized protein LOC106340954 [Brassica oleracea var. oleracea]
LOC106299601	0.13	3	4.52838	5.19e-06	Up	9.47e-07	thioredoxin H8-like [Brassica oleracea var. oleracea]
LOC106323606	1.31	29.61	4.49845	2.72e-59	Up	5.44e-61	60S ribosomal protein L18-2-like [Brassica oleracea var. oleracea]
LOC106340199	0.25	5.63	4.49313	5.16e-11	Up	5.5e-12	glutaredoxin-C13 [Brassica oleracea var. oleracea]
LOC106325105	0.06	1.31	4.44846	1.67e-05	Up	3.3e-06	epithiospecifier protein-like [Brassica napus]
LOC106328768	0.52	11.35	4.44804	2.82e-51	Up	6.63e-53	CBL-interacting serine/threonine-protein kinase 11-like [Brassica oleracea var. oleracea]
LOC106342724	0.79	17.16	4.44105	4.66e-67	Up	8.07e-69	LOB domain-containing protein 41-like [Brassica oleracea var. oleracea]
LOC106310291	0.13	2.82	4.43911	3.12e-10	Up	3.54e-11	probable 2-oxoglutarate/Fe(II)-dependent dioxygenase [Brassica oleracea var. oleracea]
LOC106293581	0.03	0.64	4.41504	0.000216204	Up	5.15e-05	protein disulfide isomerase-like 1-1 [Brassica oleracea var. oleracea]
LOC106301560	0.09	1.9	4.39993	9.43e-11	Up	1.02e-11	LOW QUALITY PROTEIN: alpha-humulene/(-)-(E)-beta-caryophyllene synthase [Brassica oleracea var. oleracea]
LOC106323054	0.12	2.53	4.39803	9.79e-15	Up	7.88e-16	low-temperature-induced 65 kDa protein-like [Brassica oleracea var. oleracea]
LOC106309847	0.04	0.84	4.39232	5.31e-05	Up	1.14e-05	uncharacterized protein LOC106309847 [Brassica oleracea var. oleracea]
LOC106298858	1	20.32	4.34483	2.33e-56	Up	4.94e-58	beta carbonic anhydrase 3-like [Brassica oleracea var. oleracea]
LOC106292506	0.05	1.01	4.33628	0.000117032	Up	2.66e-05	cinnamyl alcohol dehydrogenase 5 isoform X1 [Brassica oleracea var. oleracea]
LOC106309803	0.06	1.2	4.32193	5.31e-05	Up	1.14e-05	ethylene-responsive transcription factor CRF6 [Brassica oleracea var. oleracea]
LOC106340886	0.05	0.97	4.27799	5.31e-05	Up	1.14e-05	putative disease resistance protein At4g11170 [Brassica napus]
LOC106293258	0.23	4.4	4.2578	1.02e-09	Up	1.22e-10	CDX98429.1|//BnaC05g39460D [ napus]
LOC106300967	0.22	4.18	4.24793	7.77e-17	Up	5.53e-18	uncharacterized protein LOC106300967 [Brassica oleracea var. oleracea]
LOC106309614	2.42	45.96	4.2473	2.16e-237	Up	9.32e-240	probable apyrase 5 [Brassica oleracea var. oleracea]
LOC106298699	0.07	1.32	4.23704	9.45e-05	Up	2.12e-05	inorganic pyrophosphatase 1-like [Brassica oleracea var. oleracea]
LOC106334523	0.11	2.07	4.23405	4.68e-12	Up	4.55e-13	reticuline oxidase-like protein [Brassica oleracea var. oleracea]
LOC106319955	5.57	104.02	4.22304	8.76e-253	Up	3.43e-255	uncharacterized protein LOC106319955 [Brassica oleracea var. oleracea]
LOC106329435	0.05	0.93	4.21723	9.45e-05	Up	2.12e-05	bifunctional dihydrofolate reductase-thymidylate synthase 1 isoform X3 [Brassica oleracea var. oleracea]
LOC106340274	0.06	1.11	4.20945	1.84e-05	Up	3.67e-06	putative 2-succinyl-6-hydroxy-2,4-cyclohexadiene-1-carboxylate synthase [Brassica oleracea var. oleracea]
LOC106341072	0.08	1.48	4.20945	9.45e-05	Up	2.12e-05	rho GDP-dissociation inhibitor 1-like [Brassica oleracea var. oleracea]
LOC106301222	21.67	399.05	4.2028	0	Up	0	probable 6-phosphogluconolactonase 3 [Brassica oleracea var. oleracea]
LOC106329797	0.07	1.27	4.18133	9.45e-05	Up	2.12e-05	putative nuclease HARBI1 [Brassica oleracea var. oleracea]
LOC106297303	0.1	1.81	4.17792	0.000295984	Up	7.24e-05	zinc finger CCCH domain-containing protein 55-like [Brassica oleracea var. oleracea]
LOC106316595	1.08	19.05	4.14069	8.78e-64	Up	1.62e-65	GDSL esterase/lipase At5g03610-like [Brassica oleracea var. oleracea]
LOC106321694	0.31	5.42	4.12795	6.05e-26	Up	2.75e-27	reticuline oxidase-like protein, partial [Brassica oleracea var. oleracea]
LOC106316934	0.05	0.87	4.12101	0.000519651	Up	0.000133439	probable indole-3-pyruvate monooxygenase YUCCA4 [Brassica oleracea var. oleracea]
LOC106325099	0.05	0.86	4.10434	1.12e-07	Up	1.65e-08	lon protease homolog 4, chloroplastic/mitochondrial [Brassica oleracea var. oleracea]
LOC106321068	0.26	4.43	4.09072	2.94e-15	Up	2.29e-16	splicing factor U2af large subunit B-like [Brassica oleracea var. oleracea]
LOC106316378	0.04	0.67	4.06609	0.000914528	Up	0.00024541	mitochondrial fission protein ELM1 [Brassica oleracea var. oleracea]
LOC106339887	0.08	1.34	4.06609	3.48e-08	Up	4.86e-09	CTP synthase 1 isoform X3 [Brassica oleracea var. oleracea]
LOC106313916	0.48	8.02	4.0625	1.49e-33	Up	5.38e-35	NFU1 iron-sulfur cluster scaffold homolog, mitochondrial-like [Brassica napus]
LOC106315792	0.15	2.49	4.05311	6.85e-12	Up	6.75e-13	UDP-glycosyltransferase 90A1 [Brassica oleracea var. oleracea]
LOC106340265	0.06	0.99	4.04439	0.000296019	Up	7.24e-05	protein trichome birefringence-like 45 [Brassica oleracea var. oleracea]
LOC106340176	2.78	45.37	4.02858	4.99e-58	Up	1.03e-59	mitochondrial import inner membrane translocase subunit TIM9-like [Brassica oleracea var. oleracea]
LOC106292486	0.04	0.65	4.02237	0.000519769	Up	0.000133439	probable pectinesterase/pectinesterase inhibitor 7 [Brassica oleracea var. oleracea]
LOC106297570	0.15	2.42	4.01197	1.02e-09	Up	1.22e-10	B3 domain-containing protein At4g34400-like [Brassica oleracea var. oleracea]
LOC106321938	0.16	2.57	4.00563	1.46e-07	Up	2.19e-08	E3 ubiquitin-protein ligase UPL2-like [Brassica oleracea var. oleracea]
LOC106302238	0.34	5.45	4.00265	5.21e-25	Up	2.45e-26	cytochrome P450 76C4-like [Brassica oleracea var. oleracea]
LOC106306001	1.38	22.12	4.00261	1.66e-57	Up	3.44e-59	uncharacterized protein LOC106306001 [Brassica oleracea var. oleracea]
LOC106326669	0.13	2.07	3.99305	1.98e-07	Up	3.02e-08	nitrile-specifier protein 5-like [Brassica oleracea var. oleracea]
LOC106314374	0.07	1.11	3.98706	0.000295949	Up	7.24e-05	glucuronoxylan 4-O-methyltransferase 1 [Brassica oleracea var. oleracea]
LOC106332866	0.11	1.73	3.9752	3.53e-07	Up	5.55e-08	UDP-glycosyltransferase 79B5-like [Brassica oleracea var. oleracea]
LOC106337623	0.07	1.1	3.97401	0.000296055	Up	7.24e-05	probable 2-oxoglutarate/Fe(II)-dependent dioxygenase [Brassica oleracea var. oleracea]
LOC106318120	1.95	30.46	3.96537	3.11e-46	Up	8.15e-48	uncharacterized protein LOC106318120 [Brassica oleracea var. oleracea]
LOC106300232	0.07	1.09	3.96083	0.000914627	Up	0.00024541	glucuronoxylan 4-O-methyltransferase 3 [Brassica oleracea var. oleracea]
LOC106339483	0.06	0.93	3.9542	0.000914727	Up	0.00024541	nitrilase 2-like [Brassica oleracea var. oleracea]
LOC106317460	0.39	5.97	3.93619	1.83e-23	Up	9.18e-25	GDSL esterase/lipase At4g10955-like [Brassica oleracea var. oleracea]
LOC106298388	0.2	3.06	3.93546	2.3e-10	Up	2.57e-11	homeobox-leucine zipper protein ATHB-13 [Brassica rapa]
LOC106326764	3.78	56.01	3.88923	7.58e-122	Up	6.99e-124	uncharacterized protein LOC106326764 [Brassica oleracea var. oleracea]
LOC106324704	0.53	7.78	3.87571	1.83e-27	Up	7.88e-29	UPF0301 protein Plut_0637-like [Brassica oleracea var. oleracea]
LOC106339805	1.53	22.29	3.86479	3.92e-89	Up	5.01e-91	SWR1-complex protein 4-like isoform X1 [Brassica napus]
LOC106336287	0.09	1.3	3.85244	6.28e-07	Up	1.02e-07	probable inorganic phosphate transporter 1-5 [Brassica oleracea var. oleracea]
LOC106325604	0.2	2.83	3.82273	1.3e-09	Up	1.57e-10	feruloyl CoA ortho-hydroxylase 1 [Brassica oleracea var. oleracea]
LOC106302853	0.09	1.26	3.80735	0.000519592	Up	0.000133439	uncharacterized mitochondrial protein AtMg00810-like [Brassica oleracea var. oleracea]
LOC106304705	0.07	0.98	3.80735	0.000914429	Up	0.00024541	probable WRKY transcription factor 13 [Brassica rapa]
LOC106296731	9.66	134.51	3.79955	0	Up	0	lectin-like protein At1g53070 [Brassica oleracea var. oleracea]
LOC106320670	8.89	123.63	3.7977	0	Up	0	cytochrome P450 81F1-like [Brassica oleracea var. oleracea]
LOC106296515	0.1	1.39	3.79701	3.47e-06	Up	6.18e-07	epidermis-specific secreted glycoprotein EP1 [Brassica oleracea var. oleracea]
LOC106308936	0.45	6.19	3.78194	5.14e-16	Up	3.83e-17	cyclin-A2-3-like [Brassica oleracea var. oleracea]
LOC106300434	0.37	5.07	3.77639	9.5e-15	Up	7.64e-16	CDY26082.1|//BnaC06g11140D [Brassica napus]
LOC106322978	0.07	0.94	3.74723	0.000398005	Up	9.98e-05	suppressor of disruption of TFIIS-like [Brassica oleracea var. oleracea]
LOC106319973	83.43	1105.76	3.72833	0	Up	0	kunitz-type serine protease inhibitor DrTI-like [Brassica oleracea var. oleracea]
LOC106343291	1.31	17.27	3.72063	5.85e-37	Up	1.93e-38	ubiquitin-conjugating enzyme E2 20-like [Brassica oleracea var. oleracea]
LOC106336913	0.25	3.29	3.71809	3.83e-19	Up	2.37e-20	proline-rich receptor-like protein kinase PERK2 [Brassica oleracea var. oleracea]
LOC106316053	0.07	0.92	3.71621	9.45e-05	Up	2.12e-05	phosphatidylinositol 4-kinase gamma 2-like [Brassica oleracea var. oleracea]
LOC106296668	59.82	779.1	3.70311	0	Up	0	beta-D-glucopyranosyl abscisate beta-glucosidase-like [Brassica oleracea var. oleracea]
LOC106336798	0.07	0.9	3.6845	8.34e-11	Up	9.03e-12	ABC transporter G family member 33-like [Brassica oleracea var. oleracea]
LOC106303703	30.17	385.35	3.67498	0	Up	0	defensin-like protein 1 [Brassica oleracea var. oleracea]
LOC106330142	0.19	2.39	3.65294	1.98e-07	Up	3.02e-08	uncharacterized protein LOC106330142 [Brassica oleracea var. oleracea]
LOC106336086	0.13	1.61	3.63048	2.61e-10	Up	2.94e-11	ankyrin-2-like [Brassica oleracea var. oleracea]
LOC106299503	0.51	6.26	3.61759	2.61e-10	Up	2.94e-11	calcium-binding protein CML39 [Brassica oleracea var. oleracea]
LOC106338013	0.17	2.08	3.61298	1.85e-05	Up	3.69e-06	uncharacterized protein LOC106338013 [Brassica oleracea var. oleracea]
LOC106335745	0.09	1.1	3.61144	1.06e-05	Up	2.04e-06	uncharacterized protein LOC106335745 [Brassica oleracea var. oleracea]
LOC106296145	0.19	2.32	3.61005	1.85e-05	Up	3.69e-06	homeobox-leucine zipper protein HDG12-like [Brassica oleracea var. oleracea]
LOC106322574	0.79	9.64	3.60911	7.59e-60	Up	1.49e-61	LOW QUALITY PROTEIN: heat shock 70 kDa protein 3-like [Brassica oleracea var. oleracea]
LOC106307493	0.38	4.57	3.58812	6.74e-17	Up	4.77e-18	WAT1-related protein At1g44800-like [Brassica oleracea var. oleracea]
LOC106329549	0.04	0.48	3.58496	1.85e-05	Up	3.69e-06	probable serine/threonine protein kinase IRE [Brassica oleracea var. oleracea]
LOC106343454	28.58	342.89	3.58467	0	Up	0	non-classical arabinogalactan protein 31 [Brassica oleracea var. oleracea]
LOC106340671	0.59	6.91	3.5499	1.19e-16	Up	8.57e-18	ethylene-responsive transcription factor ERF042 [Brassica oleracea var. oleracea]
LOC106339778	0.17	1.98	3.54189	1.06e-05	Up	2.04e-06	protein LIGHT-DEPENDENT SHORT HYPOCOTYLS 10-like [Brassica oleracea var. oleracea]
LOC106322907	0.15	1.7	3.5025	5.59e-05	Up	1.2e-05	dehydrodolichyl diphosphate synthase 4-like [Brassica oleracea var. oleracea]
LOC106309378	4.07	46.11	3.50198	1.34e-47	Up	3.42e-49	60S ribosomal protein L21-1-like [Brassica oleracea var. oleracea]
LOC106322876	0.52	5.88	3.49923	2.65e-20	Up	1.54e-21	caffeic acid 3-O-methyltransferase-like [Brassica oleracea var. oleracea]
LOC106307357	0.07	0.79	3.49643	1.85e-05	Up	3.69e-06	LOW QUALITY PROTEIN: receptor-like protein 2 [Brassica oleracea var. oleracea]
LOC106326369	7.02	79.09	3.49395	0	Up	0	membrane protein of ER body 1 isoform X1 [Brassica oleracea var. oleracea]
LOC106296341	1.73	19.41	3.48796	4.04e-65	Up	7.31e-67	ifier protein-like [Brassica napus]
LOC106343582	0.58	6.47	3.47964	1.16e-15	Up	8.84e-17	CDX99447.1|//BnaC01g11050D [Brassica napus]
LOC106310143	0.12	1.32	3.45943	1.67e-05	Up	3.3e-06	CDX86568.1|//BnaC08g01350D [Brassica napus]
LOC106335383	0.09	0.98	3.44478	3.23e-05	Up	6.67e-06	uncharacterized protein LOC106335383 [Brassica oleracea var. oleracea]
LOC106321352	0.35	3.77	3.42914	9.45e-05	Up	2.12e-05	glycine-rich RNA-binding protein 2, mitochondrial-like, partial [Brassica oleracea var. oleracea]
LOC106315895	0.18	1.92	3.41504	9.65e-05	Up	2.16e-05	uncharacterized protein LOC106315895 [Brassica oleracea var. oleracea]
LOC106302151	1.08	11.31	3.3885	1.3e-28	Up	5.35e-30	GRF1-interacting factor 1 [Brassica rapa]
LOC106330616	1.24	12.98	3.38788	1.75e-50	Up	4.19e-52	uncharacterized protein LOC106330616 [Brassica oleracea var. oleracea]
LOC106313582	0.5	5.21	3.38128	2.1e-26	Up	9.34e-28	pyruvate decarboxylase 1-like [Brassica oleracea var. oleracea]
LOC106293329	8.31	86.44	3.37878	0	Up	0	(Z)-3-hexen-1-ol acetyltransferase-like [Brassica oleracea var. oleracea]
LOC106304741	0.21	2.17	3.36923	1.98e-06	Up	3.41e-07	protein FD-like [Brassica oleracea var. oleracea]
LOC106295279	0.31	3.19	3.36322	6.72e-16	Up	5.03e-17	putative acyl-coenzyme A oxidase 3.2, peroxisomal [Brassica oleracea var. oleracea]
LOC106305653	0.36	3.7	3.36146	1.98e-06	Up	3.41e-07	14.7 kDa heat shock protein [Brassica oleracea var. oleracea]
LOC106308073	3.98	40.77	3.35667	6.47e-55	Up	1.43e-56	thioredoxin H-type [Brassica oleracea var. oleracea]
LOC106304172	0.17	1.74	3.35548	7.31e-09	Up	9.45e-10	uncharacterized protein LOC106428686 [Brassica napus]
LOC106328960	16.29	166.26	3.35138	0	Up	0	polygalacturonase inhibitor 2-like [Brassica oleracea var. oleracea]
LOC106335780	0.4	4.03	3.33271	6.57e-07	Up	1.07e-07	18 kDa seed maturation protein-like [Brassica oleracea var. oleracea]
LOC106322990	0.36	3.62	3.32992	4e-08	Up	5.62e-09	protein AIG2-like isoform X3 [Brassica oleracea var. oleracea]
LOC106326628	0.14	1.38	3.30117	0.00028487	Up	6.93e-05	UDP-glycosyltransferase 79B9-like [Brassica oleracea var. oleracea]
LOC106292240	0.56	5.48	3.29068	5.86e-24	Up	2.88e-25	BAHD acyltransferase At5g47980-like [Brassica oleracea var. oleracea]
LOC106332528	0.75	7.31	3.28491	1.4e-09	Up	1.69e-10	metallothionein-like protein type 3 [Brassica oleracea var. oleracea]
LOC106321231	0.51	4.97	3.28468	6.93e-08	Up	1e-08	uncharacterized protein LOC106321231 [Brassica oleracea var. oleracea]
LOC106337668	1.4	13.57	3.27692	1.05e-65	Up	1.86e-67	tryptophan N-monooxygenase 2 [Brassica oleracea var. oleracea]
LOC106316287	1.09	10.5	3.26799	1.72e-13	Up	1.51e-14	gibberellin-regulated protein 7 isoform X2 [Brassica oleracea var. oleracea]
LOC106296084	0.33	3.17	3.26395	4.83e-11	Up	5.12e-12	probable cysteine proteinase At3g43960 [Brassica oleracea var. oleracea]
LOC106327479	18.33	175.89	3.2624	0	Up	0	trypsin inhibitor B-like [Brassica oleracea var. oleracea]
LOC106298364	0.17	1.62	3.25239	1.01e-05	Up	1.92e-06	ninja-family protein AFP1-like [Brassica oleracea var. oleracea]
LOC106304273	0.17	1.61	3.24345	2.06e-07	Up	3.14e-08	uncharacterized protein LOC106304273 [Brassica oleracea var. oleracea]
LOC106295712	0.58	5.49	3.24268	1.18e-26	Up	5.18e-28	putative cyclin-B3-1 isoform X2 [Brassica oleracea var. oleracea]
LOC106302438	0.4	3.76	3.23266	4.38e-09	Up	5.53e-10	glutathione S-transferase T3-like [Brassica oleracea var. oleracea]
LOC106322957	0.13	1.22	3.2303	3.47e-06	Up	6.18e-07	amino-acid permease BAT1-like [Brassica oleracea var. oleracea]
LOC106332591	0.57	5.3	3.21696	2.78e-11	Up	2.89e-12	uncharacterized protein LOC106332591 isoform X1 [Brassica oleracea var. oleracea]
LOC106340210	0.32	2.96	3.20945	2.06e-07	Up	3.14e-08	hypothetical protein EUTSA_v10016298mg [Eutrema salsugineum]
LOC106341128	1.01	9.28	3.19977	2.9e-12	Up	2.77e-13	uncharacterized protein LOC106341128 [Brassica oleracea var. oleracea]
LOC106336052	0.14	1.27	3.18133	4.38e-09	Up	5.53e-10	sucrose synthase 1 [Brassica oleracea var. oleracea]
LOC106305810	0.15	1.36	3.18057	0.000484653	Up	0.000123533	E3 ubiquitin-protein ligase BOI-like [Brassica oleracea var. oleracea]
LOC106313235	0.34	3.08	3.17932	1.24e-08	Up	1.65e-09	peroxidase 37 [Brassica oleracea var. oleracea]
LOC106313773	2.5	22.49	3.16928	3.31e-68	Up	5.59e-70	dehydration-responsive protein RD22-like [Brassica oleracea var. oleracea]
LOC106329260	0.8	7.16	3.16189	3.32e-25	Up	1.55e-26	F-box/kelch-repeat protein At4g39560-like [Brassica oleracea var. oleracea]
LOC106333831	0.59	5.28	3.16175	1.72e-13	Up	1.51e-14	uncharacterized protein LOC106333831 [Brassica oleracea var. oleracea]
LOC106292481	0.15	1.34	3.1592	1.04e-06	Up	1.73e-07	uncharacterized protein LOC106399594 [Brassica napus]
LOC106329578	0.13	1.16	3.15754	1.72e-05	Up	3.4e-06	cytochrome P450 705A5-like [Brassica oleracea var. oleracea]
LOC106301883	0.1	0.89	3.15381	0.00051971	Up	0.000133439	uncharacterized protein LOC103874800 [Brassica rapa]
LOC106333640	0.33	2.93	3.15036	0.000824101	Up	0.000219316	CDY21326.1|//BnaC03g30100D [Brassica napus]
LOC106340066	0.55	4.87	3.14642	2.9e-12	Up	2.77e-13	tropinone reductase homolog At2g30670-like [Brassica oleracea var. oleracea]
LOC106301732	0.25	2.2	3.1375	0.00082401	Up	0.000219316	uncharacterized protein LOC106417541 [Brassica napus]
LOC106312582	0.1	0.88	3.1375	0.00082392	Up	0.000219316	LOW QUALITY PROTEIN: F-box/FBD/LRR-repeat protein At1g13780-like [Brassica oleracea var. oleracea]
LOC106316354	5.42	47.28	3.12486	2.83e-181	Up	1.7e-183	cytochrome P450 71A1-like [Brassica oleracea var. oleracea]
LOC106344000	0.68	5.87	3.10975	1.75e-40	Up	5.23e-42	probable E3 ubiquitin ligase SUD1 [Brassica oleracea var. oleracea]
LOC106339986	0.32	2.72	3.08746	4.21e-09	Up	5.29e-10	leucoanthocyanidin dioxygenase [Brassica oleracea var. oleracea]
LOC106312656	1.17	9.84	3.07215	6e-16	Up	4.48e-17	15 kDa selenoprotein-like [Brassica oleracea var. oleracea]
LOC106313778	0.19	1.58	3.05585	6.93e-08	Up	1e-08	LOW QUALITY PROTEIN: pentatricopeptide repeat-containing protein At3g26540 [Brassica oleracea var. oleracea]
LOC106325159	7.18	59.62	3.05374	1.58e-77	Up	2.32e-79	non-specific lipid-transfer protein 4-like [Brassica rapa]
LOC106342080	0.41	3.38	3.04333	5.12e-13	Up	4.65e-14	UPF0481 protein At3g47200-like [Brassica oleracea var. oleracea]
LOC106328101	0.46	3.79	3.04249	9.02e-14	Up	7.73e-15	tubulin beta-9 chain [Brassica rapa]
LOC106322964	8.83	72.66	3.04068	7.39e-119	Up	6.93e-121	MLP-like protein 328 [Brassica rapa]
LOC106295110	109.49	899.05	3.0376	0	Up	0	jacalin-related lectin 35 [Brassica oleracea var. oleracea]
LOC106299921	0.14	1.14	3.02554	1.06e-07	Up	1.56e-08	probable disease resistance protein At1g15890 [Brassica oleracea var. oleracea]
LOC106292759	1.61	13.11	3.02554	1.28e-39	Up	3.93e-41	homocysteine S-methyltransferase 3 [Brassica oleracea var. oleracea]
LOC106300718	21.66	174.86	3.01309	0	Up	0	beta-D-glucopyranosyl abscisate beta-glucosidase-like [Brassica oleracea var. oleracea]
LOC106303706	0.56	4.52	3.01282	1.31e-11	Up	1.33e-12	uncharacterized protein LOC106303706 [Brassica oleracea var. oleracea]
LOC106292970	0.2	1.61	3.00899	0.000140893	Up	3.25e-05	protein LIGHT-DEPENDENT SHORT HYPOCOTYLS 2 [Brassica oleracea var. oleracea]
LOC106333487	0.24	1.93	3.0075	1.04e-15	Up	7.85e-17	myrosinase-binding protein 2-like [Brassica oleracea var. oleracea]
LOC106336514	4.41	35.34	3.00245	2.61e-234	Up	1.14e-236	diacylglycerol kinase 1-like [Brassica oleracea var. oleracea]
LOC106313779	0.48	3.83	2.99624	5.43e-18	Up	3.59e-19	outer envelope protein 64, mitochondrial [Brassica oleracea var. oleracea]
LOC106307878	0.47	3.74	2.99231	1.04e-06	Up	1.73e-07	suppressor protein SRP40 [Brassica oleracea var. oleracea]
LOC106336092	13.01	103.2	2.98775	0	Up	0	phosphoserine aminotransferase 1, chloroplastic [Brassica oleracea var. oleracea]
LOC106309957	0.48	3.79	2.98109	3.82e-11	Up	4.02e-12	cytosolic sulfotransferase 1-like [Brassica oleracea var. oleracea]
LOC106319965	10.66	83.62	2.97164	2.71e-136	Up	2.2e-138	21 kDa seed protein-like [Brassica oleracea var. oleracea]
LOC106307303	0.51	4	2.97143	9.31e-19	Up	5.91e-20	transmembrane 9 superfamily member 10 [Brassica oleracea var. oleracea]
LOC106341021	1.45	11.32	2.96475	3.87e-12	Up	3.74e-13	cysteine-rich and transmembrane domain-containing protein A [Brassica rapa]
LOC106316858	1.05	8.17	2.95995	5.31e-15	Up	4.2e-16	allene oxide cyclase 2, chloroplastic-like [Brassica oleracea var. oleracea]
LOC106307548	0.08	0.62	2.9542	0.000140875	Up	3.25e-05	pentatricopeptide repeat-containing protein At3g54980, mitochondrial [Brassica oleracea var. oleracea]
LOC106329938	1.57	12.02	2.9366	1.34e-14	Up	1.09e-15	embryonic protein DC-8 [Brassica oleracea var. oleracea]
LOC106335132	0.21	1.6	2.92961	2.13e-08	Up	2.9e-09	shikimate O-hydroxycinnamoyltransferase-like [Brassica oleracea var. oleracea]
LOC106340534	0.18	1.37	2.92811	0.000140911	Up	3.25e-05	growth-regulating factor 4-like [Brassica oleracea var. oleracea]
LOC106306473	4.47	33.98	2.92634	2.1e-45	Up	5.64e-47	uncharacterized protein LOC106306473 [Brassica oleracea var. oleracea]
LOC106336851	0.94	7.1	2.91709	1.6e-20	Up	9.19e-22	nitrile-specifier protein 2-like [Brassica oleracea var. oleracea]
LOC106316552	3.74	28.02	2.90535	1.26e-25	Up	5.76e-27	CDY06811.1|//BnaC01g09100D [Brassica napus]
LOC106322226	3.35	25.05	2.90258	1.24e-27	Up	5.28e-29	venom phosphodiesterase 2-like [Brassica napus]
LOC106304211	0.36	2.69	2.90154	6.07e-07	Up	9.81e-08	protein ULTRAPETALA 1-like isoform X1 [Brassica oleracea var. oleracea]
LOC106340391	0.39	2.91	2.89947	5.17e-07	Up	8.28e-08	annexin D3-like [Brassica oleracea var. oleracea]
LOC106334503	0.63	4.69	2.89616	0.00023626	Up	5.67e-05	UPF0676 protein C1494.01-like [Brassica oleracea var. oleracea]
LOC106313974	1.43	10.63	2.89405	1.59e-22	Up	8.28e-24	guanine nucleotide-binding protein subunit gamma 3-like isoform X2 [Brassica oleracea var. oleracea]
LOC106298688	0.14	1.04	2.89309	0.000236231	Up	5.67e-05	transcription factor PERIANTHIA isoform X1 [Brassica oleracea var. oleracea]
LOC106316933	1.79	13.25	2.88796	6.46e-10	Up	7.54e-11	mitochondrial import receptor subunit TOM7-2-like [Brassica oleracea var. oleracea]
LOC106341406	1.19	8.8	2.88654	1.88e-11	Up	1.93e-12	uncharacterized protein LOC106341406 [Brassica oleracea var. oleracea]
LOC106333488	5.95	43.84	2.88129	2.04e-282	Up	6.74e-285	myrosinase-binding protein 2-like [Brassica oleracea var. oleracea]
LOC106340068	0.12	0.88	2.87447	0.000393382	Up	9.84e-05	uncharacterized protein LOC106340068 [Brassica oleracea var. oleracea]
LOC106316509	0.6	4.39	2.87119	2.46e-06	Up	4.29e-07	AP-4 complex subunit sigma [Brassica oleracea var. oleracea]
LOC106338067	0.26	1.9	2.86942	3.22e-12	Up	3.08e-13	uncharacterized protein LOC106338067 [Brassica oleracea var. oleracea]
LOC106301706	1.06	7.74	2.86827	4.41e-26	Up	2e-27	beta-glucosidase 40-like isoform X1 [Brassica oleracea var. oleracea]
LOC106316157	0.92	6.71	2.86661	1.34e-20	Up	7.66e-22	cytosolic sulfotransferase 15-like [Brassica oleracea var. oleracea]
LOC106304648	0.63	4.58	2.86192	2.41e-05	Up	4.88e-06	UPF0057 membrane protein At4g30650 [Brassica oleracea var. oleracea]
LOC106343115	0.12	0.87	2.85798	0.000393565	Up	9.84e-05	aldehyde dehydrogenase family 2 member B7, mitochondrial [Brassica oleracea var. oleracea]
LOC106321113	0.2	1.45	2.85798	0.000236289	Up	5.67e-05	early nodulin-like protein 2 isoform X2 [Brassica oleracea var. oleracea]
LOC106316002	0.45	3.26	2.85688	7.88e-21	Up	4.45e-22	ethylene receptor 2 [Brassica oleracea var. oleracea]
LOC106333342	0.46	3.33	2.85582	0.000393519	Up	9.84e-05	HVA22-like protein e [Brassica napus]
LOC106297269	0.46	3.33	2.85582	2.41e-05	Up	4.88e-06	protein cornichon homolog 1-like [Brassica oleracea var. oleracea]
LOC106293288	0.21	1.52	2.85561	0.000393473	Up	9.84e-05	WUSCHEL-related homeobox 4-like [Brassica oleracea var. oleracea]
LOC106338528	0.48	3.47	2.85383	0.000236203	Up	5.67e-05	uncharacterized protein LOC106338528, partial [Brassica oleracea var. oleracea]
LOC106331317	0.16	1.15	2.84549	4.01e-05	Up	8.43e-06	protein LURP-one-related 8-like isoform X1 [Brassica oleracea var. oleracea]
LOC106343901	0.55	3.95	2.84435	1.88e-10	Up	2.09e-11	B3 domain-containing protein At4g34400-like [Brassica oleracea var. oleracea]
LOC106331938	0.89	6.36	2.83715	1.89e-15	Up	1.46e-16	plant cysteine oxidase 1 [Brassica oleracea var. oleracea]
LOC106293773	0.42	2.99	2.83168	3.11e-08	Up	4.31e-09	gibberellin 2-beta-dioxygenase 2-like [Brassica oleracea var. oleracea]
LOC106302264	0.18	1.28	2.83007	4.01e-05	Up	8.43e-06	amino-acid permease BAT1 [Brassica rapa]
LOC106293541	17.86	126.46	2.82388	0	Up	0	probable inactive serine/threonine-protein kinase fnkC [Brassica oleracea var. oleracea]
LOC106329377	0.17	1.2	2.81943	2.41e-05	Up	4.88e-06	RING-H2 finger protein ATL65-like [Brassica oleracea var. oleracea]
LOC106310473	1.31	9.18	2.80893	2.16e-36	Up	7.22e-38	indole-3-acetic acid-amido synthetase GH3.3 [Brassica oleracea var. oleracea]
LOC106343057	0.16	1.12	2.80735	0.000393427	Up	9.84e-05	alpha-amylase 1 [Brassica oleracea var. oleracea]
LOC106338525	0.28	1.96	2.80735	4.22e-08	Up	5.95e-09	uncharacterized protein LOC106338525, partial [Brassica oleracea var. oleracea]
LOC106337582	21.89	153.15	2.8066	0	Up	0	osmotin-like protein [Brassica oleracea var. oleracea]
LOC106343192	0.38	2.64	2.79647	1.12e-14	Up	9.06e-16	probable beta-D-xylosidase 5 isoform X2 [Brassica oleracea var. oleracea]
LOC106309836	1.23	8.52	2.79219	1.81e-23	Up	9.07e-25	protein STRICTOSIDINE SYNTHASE-LIKE 9 [Brassica oleracea var. oleracea]
LOC106298807	0.65	4.47	2.78176	2.46e-06	Up	4.29e-07	thioredoxin-like protein CITRX, chloroplastic [Brassica oleracea var. oleracea]
LOC106297104	0.83	5.65	2.76707	2.99e-25	Up	1.39e-26	cysteine-rich receptor-like protein kinase 11 [Brassica oleracea var. oleracea]
LOC106332715	0.21	1.42	2.75743	6.66e-05	Up	1.45e-05	protein IQ-DOMAIN 14 isoform X1 [Brassica oleracea var. oleracea]
LOC106309444	0.12	0.81	2.75489	4.01e-05	Up	8.43e-06	G-type lectin S-receptor-like serine/threonine-protein kinase At1g11330 [Brassica oleracea var. oleracea]
LOC106332095	0.5	3.37	2.75275	4.3e-09	Up	5.41e-10	cysteine-rich receptor-like protein kinase 45 [Brassica oleracea var. oleracea]
LOC106293143	0.71	4.78	2.75112	4.32e-11	Up	4.56e-12	uncharacterized protein LOC106293143 [Brassica oleracea var. oleracea]
LOC106299628	3.6	24.22	2.75013	3.06e-23	Up	1.55e-24	uncharacterized protein LOC106299628 [Brassica oleracea var. oleracea]
LOC106317669	3.56	23.89	2.74646	3.63e-26	Up	1.63e-27	uncharacterized protein LOC106317669 [Brassica oleracea var. oleracea]
LOC106308088	2.58	17.31	2.74616	2e-45	Up	5.35e-47	KDEL-tailed cysteine endopeptidase CEP3 [Brassica oleracea var. oleracea]
LOC106293096	0.5	3.35	2.74416	4.3e-09	Up	5.41e-10	inositol oxygenase 1 isoform X1 [Brassica oleracea var. oleracea]
LOC106326047	0.58	3.88	2.74193	6.66e-05	Up	1.45e-05	uncharacterized protein At5g22580-like [Brassica oleracea var. oleracea]
LOC106344136	0.51	3.41	2.7412	7.05e-08	Up	1.02e-08	4-coumarate--CoA ligase 2-like, partial [Brassica napus]
LOC106292474	0.22	1.47	2.74024	1.21e-10	Up	1.33e-11	pentatricopeptide repeat-containing protein At1g06710, mitochondrial isoform X1 [Brassica oleracea var. oleracea]
LOC106302134	0.47	3.12	2.73081	4.32e-11	Up	4.56e-12	homeobox protein ATH1-like [Brassica oleracea var. oleracea]
LOC106292932	0.3	1.99	2.72973	1.15e-06	Up	1.93e-07	uncharacterized protein LOC106292932 [Brassica oleracea var. oleracea]
LOC106339606	0.39	2.55	2.70895	2e-09	Up	2.45e-10	cytochrome P450 83A1-like [Brassica oleracea var. oleracea]
LOC106336003	0.25	1.63	2.70487	8.38e-05	Up	1.86e-05	CDY25718.1|//BnaC03g69570D [Brassica napus]
LOC106306661	0.34	2.21	2.70044	1.15e-06	Up	1.93e-07	probable isoaspartyl peptidase/L-asparaginase 3 [Brassica oleracea var. oleracea]
LOC106307549	0.07	0.45	2.6845	0.000651802	Up	0.000170304	LOW QUALITY PROTEIN: type I inositol polyphosphate 5-phosphatase 13-like [Brassica oleracea var. oleracea]
LOC106303811	4.41	28.2	2.67685	2.44e-65	Up	4.36e-67	zinc finger CCCH domain-containing protein 49 [Brassica oleracea var. oleracea]
LOC106311033	0.59	3.76	2.67195	0.00018123	Up	4.26e-05	uncharacterized protein LOC106311033 [Brassica oleracea var. oleracea]
LOC106326980	0.19	1.2	2.65896	1.86e-05	Up	3.71e-06	disease resistance protein RPS6-like [Brassica oleracea var. oleracea]
LOC106308127	0.48	3.03	2.65821	3.16e-06	Up	5.6e-07	2-oxoglutarate-dependent dioxygenase DAO-like [Brassica oleracea var. oleracea]
LOC106295172	0.37	2.33	2.65473	5.67e-12	Up	5.55e-13	probable DNA helicase MCM8 isoform X1 [Brassica oleracea var. oleracea]
LOC106303920	0.31	1.95	2.65313	0.000484709	Up	0.000123533	dirigent protein 6 [Brassica oleracea var. oleracea]
LOC106340016	0.25	1.57	2.65076	3.07e-05	Up	6.31e-06	pentatricopeptide repeat-containing protein At2g36730 [Brassica oleracea var. oleracea]
LOC106316041	0.57	3.56	2.64284	4.16e-07	Up	6.59e-08	early nodulin-like protein 1 [Brassica oleracea var. oleracea]
LOC106312166	0.99	6.17	2.63977	9.12e-09	Up	1.19e-09	uncharacterized protein LOC106312166 [Brassica oleracea var. oleracea]
LOC106301388	1.79	11.15	2.63901	6.94e-40	Up	2.11e-41	uncharacterized CRM domain-containing protein At3g25440, chloroplastic [Brassica oleracea var. oleracea]
LOC106315689	0.36	2.24	2.63743	3.27e-08	Up	4.56e-09	cyclin-A2-2 [Brassica oleracea var. oleracea]
LOC106313856	23.17	144.12	2.63694	0	Up	0	inositol oxygenase 2-like [Brassica oleracea var. oleracea]
LOC106322102	1.05	6.51	2.63227	6.66e-05	Up	1.45e-05	protein AIG2-like [Brassica napus]
LOC106335329	0.8	4.96	2.63227	5.41e-08	Up	7.73e-09	peptide methionine sulfoxide reductase A2-like [Brassica oleracea var. oleracea]
LOC106308133	0.96	5.94	2.62936	7.28e-19	Up	4.57e-20	tryptophan synthase beta chain 1-like [Brassica oleracea var. oleracea]
LOC106317840	0.22	1.36	2.62803	3.22e-07	Up	5.03e-08	protein QUIRKY-like [Brassica oleracea var. oleracea]
LOC106327901	0.63	3.89	2.62635	1.55e-10	Up	1.71e-11	dnaJ homolog subfamily B member 4-like [Brassica rapa]
LOC106296364	2.23	13.76	2.62536	4.36e-16	Up	3.23e-17	unknwn protein
LOC106316685	0.2	1.23	2.62059	1.17e-07	Up	1.74e-08	protein argonaute 9-like [Brassica oleracea var. oleracea]
LOC106337702	0.34	2.08	2.61298	1.44e-06	Up	2.43e-07	F-box/kelch-repeat protein At1g64840-like isoform X1 [Brassica oleracea var. oleracea]
LOC106323056	0.26	1.59	2.61244	1.92e-06	Up	3.29e-07	DNA replication licensing factor MCM3-like [Brassica oleracea var. oleracea]
LOC106297010	0.16	0.97	2.59991	0.000296571	Up	7.25e-05	protein ROOT PRIMORDIUM DEFECTIVE 1 [Brassica oleracea var. oleracea]
LOC106337558	8.17	49.45	2.59756	3.94e-138	Up	3.18e-140	protodermal factor 1-like [Brassica napus]
LOC106304300	0.8	4.84	2.59694	2.56e-10	Up	2.89e-11	ethylene-responsive transcription factor ERF043-like [Brassica oleracea var. oleracea]
LOC106328366	1.89	11.37	2.58877	5.18e-41	Up	1.53e-42	growth-regulating factor 1 [Brassica oleracea var. oleracea]
LOC106316325	0.65	3.91	2.58866	8.75e-07	Up	1.44e-07	polyadenylate-binding protein-interacting protein 6-like [Brassica oleracea var. oleracea]
LOC106337409	0.6	3.6	2.58496	9.43e-18	Up	6.31e-19	delta-1-pyrroline-5-carboxylate synthase A isoform X1 [Brassica oleracea var. oleracea]
LOC106323087	0.85	5.09	2.58213	1.2e-13	Up	1.04e-14	uncharacterized protein LOC106323087 isoform X2 [Brassica oleracea var. oleracea]
LOC106325945	4.47	26.67	2.57687	1.44e-53	Up	3.26e-55	uncharacterized protein LOC106325945 [Brassica oleracea var. oleracea]
LOC106334259	0.24	1.43	2.57491	0.000296607	Up	7.25e-05	uncharacterized protein LOC106334259 [Brassica oleracea var. oleracea]
LOC106302267	0.68	4.03	2.56717	4.18e-09	Up	5.26e-10	(R,S)-reticuline 7-O-methyltransferase-like [Brassica oleracea var. oleracea]
LOC106329385	0.2	1.18	2.56072	2.41e-07	Up	3.71e-08	formin-like protein 5 [Brassica oleracea var. oleracea]
LOC106309509	20.89	122.78	2.55519	2.11e-237	Up	9.04e-240	21 kDa protein-like [Brassica oleracea var. oleracea]
LOC106337346	1.34	7.87	2.55413	2.48e-24	Up	1.2e-25	protein kinase PINOID [Brassica oleracea var. oleracea]
LOC106298748	0.56	3.28	2.5502	2.41e-07	Up	3.71e-08	60S ribosomal protein L16-like, mitochondrial [Brassica oleracea var. oleracea]
LOC106332986	18.87	110.4	2.54857	8.29e-296	Up	2.57e-298	venom phosphodiesterase 2-like [Brassica oleracea var. oleracea]
LOC106316484	2.45	14.32	2.54718	5.98e-52	Up	1.39e-53	uncharacterized protein LOC106316484 isoform X1 [Brassica oleracea var. oleracea]
LOC106303913	0.24	1.4	2.54432	2.25e-05	Up	4.54e-06	MLO-like protein 8 [Brassica oleracea var. oleracea]
LOC106298944	0.71	4.13	2.54025	1.17e-10	Up	1.27e-11	transcription factor TCP1-like [Brassica oleracea var. oleracea]
LOC106309653	0.32	1.86	2.53916	8.18e-05	Up	1.81e-05	1-aminocyclopropane-1-carboxylate oxidase 3-like [Brassica oleracea var. oleracea]
LOC106308314	0.2	1.16	2.53605	8.18e-05	Up	1.81e-05	protein HOTHEAD [Brassica oleracea var. oleracea]
LOC106298737	0.29	1.68	2.53434	0.000483028	Up	0.000123034	uncharacterized protein LOC106298737 [Brassica oleracea var. oleracea]
LOC106336793	12.06	69.17	2.51992	5.8e-95	Up	6.9e-97	uncharacterized protein LOC106336793 [Brassica oleracea var. oleracea]
LOC106329376	1.06	6.06	2.51525	4.33e-12	Up	4.2e-13	protein LIGHT-DEPENDENT SHORT HYPOCOTYLS 10 [Brassica oleracea var. oleracea]
LOC106304481	0.87	4.97	2.51416	1.88e-09	Up	2.29e-10	uncharacterized protein LOC106304481 [Brassica oleracea var. oleracea]
LOC106330407	0.45	2.56	2.50815	1.17e-10	Up	1.27e-11	uncharacterized protein LOC106330407 [Brassica oleracea var. oleracea]
LOC106295053	0.69	3.92	2.50618	5.59e-31	Up	2.15e-32	ABC transporter G family member 40 [Brassica oleracea var. oleracea]
LOC106313398	0.6	3.39	2.49825	1.52e-17	Up	1.03e-18	beta-D-xylosidase 1-like [Brassica oleracea var. oleracea]
LOC106304165	0.59	3.33	2.49674	5.31e-07	Up	8.52e-08	uncharacterized protein LOC106304165 [Brassica oleracea var. oleracea]
LOC106344539	1.98	11.15	2.49347	2.87e-22	Up	1.51e-23	nuclear transcription factor Y subunit A-2-like [Brassica oleracea var. oleracea]
LOC106304286	0.4	2.25	2.49185	2.41e-07	Up	3.71e-08	uncharacterized transporter YBR287W [Brassica oleracea var. oleracea]
LOC106339265	1.26	7.06	2.48624	6.81e-17	Up	4.82e-18	CDY19092.1|//BnaA04g18320D [Brassica napus]
LOC106299555	0.73	4.09	2.48613	0.00013254	Up	3.04e-05	CLAVATA3/ESR (CLE)-related protein 13 [Brassica oleracea var. oleracea]
LOC106302605	0.35	1.96	2.48543	0.00011021	Up	2.49e-05	uncharacterized protein LOC106363160 [Brassica napus]
LOC106333348	1.13	6.29	2.47674	1.09e-13	Up	9.43e-15	uncharacterized isomerase BH0283-like [Brassica oleracea var. oleracea]
LOC106326798	160.28	890.01	2.47323	0	Up	0	myrosinase [Brassica oleracea var. oleracea]
LOC106296421	0.62	3.43	2.46787	0.000344363	Up	8.52e-05	uncharacterized protein LOC106296421 isoform X1 [Brassica oleracea var. oleracea]
LOC106318780	4.79	26.43	2.46408	2.01e-100	Up	2.24e-102	pyruvate decarboxylase 2 [Brassica oleracea var. oleracea]
LOC106295364	0.71	3.91	2.46128	5.03e-09	Up	6.39e-10	uncharacterized protein LOC106295364 [Brassica oleracea var. oleracea]
LOC106343111	0.14	0.77	2.45943	0.000783825	Up	0.000207728	pentatricopeptide repeat-containing protein At1g09820 [Brassica oleracea var. oleracea]
LOC106326897	0.58	3.19	2.45943	1.05e-06	Up	1.74e-07	protein LIGHT-DEPENDENT SHORT HYPOCOTYLS 9-like [Brassica oleracea var. oleracea]
LOC106340983	0.33	1.8	2.44746	0.00021423	Up	5.1e-05	uncharacterized protein LOC106340983 [Brassica oleracea var. oleracea]
LOC106318665	0.31	1.69	2.44668	2.23e-09	Up	2.75e-10	polyribonucleotide nucleotidyltransferase 2, mitochondrial-like isoform X2 [Brassica oleracea var. oleracea]
LOC106332890	0.4	2.18	2.44626	1.7e-06	Up	2.91e-07	LOW QUALITY PROTEIN: UDP-glycosyltransferase 89A2 [Brassica oleracea var. oleracea]
LOC106319964	206.81	1118.43	2.4351	0	Up	0	kunitz-type serine protease inhibitor DrTI-like [Brassica oleracea var. oleracea]
LOC106300288	0.86	4.64	2.43172	1.44e-06	Up	2.43e-07	calmodulin-like [Brassica napus]
LOC106309982	1.06	5.71	2.42943	8.18e-09	Up	1.06e-09	ylmG homolog protein 1-2, chloroplastic-like [Brassica oleracea var. oleracea]
LOC106292951	0.29	1.56	2.42742	0.000214257	Up	5.1e-05	protein OSB4, chloroplastic [Brassica oleracea var. oleracea]
LOC106344172	0.98	5.27	2.42695	2.12e-24	Up	1.02e-25	uncharacterized protein LOC106344172 [Brassica oleracea var. oleracea]
LOC106303699	1.5	8.06	2.42582	3.36e-20	Up	1.97e-21	endoplasmic reticulum-Golgi intermediate compartment protein 3-like [Brassica oleracea var. oleracea]
LOC106336756	0.38	2.03	2.41741	1.7e-06	Up	2.91e-07	U4/U6 small nuclear ribonucleoprotein PRP4-like protein [Brassica oleracea var. oleracea]
LOC106331241	0.06	0.32	2.41504	0.000214178	Up	5.1e-05	LOW QUALITY PROTEIN: calpain-type cysteine protease DEK1-like [Brassica oleracea var. oleracea]
LOC106336985	7.25	38.65	2.41442	1.22e-50	Up	2.91e-52	uncharacterized protein LOC106336985 isoform X1 [Brassica oleracea var. oleracea]
LOC106308893	0.92	4.9	2.41308	5.77e-14	Up	4.86e-15	sterol 14-demethylase-like [Brassica oleracea var. oleracea]
LOC106321911	0.96	5.09	2.40656	5.28e-18	Up	3.49e-19	trihelix transcription factor GTL2-like [Brassica oleracea var. oleracea]
LOC106326162	0.95	5.03	2.40456	3.02e-15	Up	2.35e-16	cytokinin hydroxylase-like [Brassica oleracea var. oleracea]
LOC106294700	0.5	2.64	2.40054	8.75e-07	Up	1.44e-07	cytosolic sulfotransferase 11-like [Brassica rapa]
LOC106312842	0.18	0.95	2.39993	0.000344322	Up	8.52e-05	uncharacterized protein LOC106312842 [Brassica oleracea var. oleracea]
LOC106316347	0.29	1.53	2.39941	1e-05	Up	1.91e-06	myrosinase-binding protein 2-like [Brassica oleracea var. oleracea]
LOC106312570	1.27	6.69	2.39718	3.44e-13	Up	3.08e-14	transcription factor bHLH113-like isoform X2 [Brassica oleracea var. oleracea]
LOC106305905	0.08	0.42	2.39232	0.000549401	Up	0.000141624	ABC transporter C family member 8-like [Brassica oleracea var. oleracea]
LOC106301839	0.32	1.68	2.39232	6.45e-07	Up	1.04e-07	sulfate transporter 3.1 isoform X1 [Brassica oleracea var. oleracea]
LOC106318719	3.53	18.51	2.39057	4.75e-80	Up	6.77e-82	mechanosensitive ion channel protein 10-like [Brassica oleracea var. oleracea]
LOC106343816	2.35	12.28	2.38558	7.26e-34	Up	2.59e-35	UDP-glycosyltransferase 72B3 [Brassica oleracea var. oleracea]
LOC106318901	3.27	17.04	2.38156	3.24e-38	Up	1.03e-39	flavone 3'-O-methyltransferase 1-like [Brassica oleracea var. oleracea]
LOC106320542	0.34	1.77	2.38014	1.61e-05	Up	3.17e-06	RHOMBOID-like protein 9, chloroplastic [Brassica oleracea var. oleracea]
LOC106301277	87.17	452.71	2.37668	0	Up	0	non-classical arabinogalactan protein 31-like [Brassica oleracea var. oleracea]
LOC106329555	0.42	2.18	2.37587	5.88e-09	Up	7.52e-10	endoglucanase 19 isoform X1 [Brassica oleracea var. oleracea]
LOC106329998	0.37	1.92	2.37551	7.87e-08	Up	1.14e-08	uncharacterized protein LOC106329998 [Brassica oleracea var. oleracea]
LOC106304047	0.34	1.76	2.37197	0.000594068	Up	0.000154023	alcohol dehydrogenase-like 1 isoform X2 [Brassica oleracea var. oleracea]
LOC106323960	1.36	7	2.36375	6.12e-35	Up	2.12e-36	microtubule-associated protein TORTIFOLIA1 [Brassica oleracea var. oleracea]
LOC106325292	1.07	5.5	2.36182	1.18e-10	Up	1.29e-11	probable xyloglucan endotransglucosylase/hydrolase protein 25 [Brassica oleracea var. oleracea]
LOC106342498	0.32	1.64	2.35755	4.42e-06	Up	7.99e-07	patatin-like protein 6 [Brassica oleracea var. oleracea]
LOC106339343	5.55	28.43	2.35685	4.81e-67	Up	8.35e-69	hydroxyacylglutathione hydrolase 1, mitochondrial isoform X1 [Brassica oleracea var. oleracea]
LOC106302075	1.84	9.42	2.35602	3.43e-13	Up	3.08e-14	uncharacterized protein LOC106302075 [Brassica oleracea var. oleracea]
LOC106331761	0.34	1.74	2.35548	1.61e-05	Up	3.17e-06	serine carboxypeptidase-like 42 [Brassica oleracea var. oleracea]
LOC106301766	1.8	9.2	2.35364	2.26e-33	Up	8.17e-35	uncharacterized protein LOC106391782 [Brassica napus]
LOC106335915	1.98	10.1	2.35078	7.7e-21	Up	4.35e-22	probable ubiquitin-conjugating enzyme E2 37 [Brassica oleracea var. oleracea]
LOC106340049	0.59	3	2.34618	4.11e-05	Up	8.67e-06	cyclin-U2-1 [Brassica oleracea var. oleracea]
LOC106295606	93.8	476.91	2.34606	0	Up	0	extensin-3-like [Brassica napus]
LOC106292778	0.27	1.37	2.34314	9.42e-05	Up	2.11e-05	uncharacterized protein LOC106292778 [Brassica oleracea var. oleracea]
LOC106321701	0.44	2.23	2.34147	3.67e-07	Up	5.77e-08	GDSL esterase/lipase At5g42170 isoform X2 [Brassica oleracea var. oleracea]
LOC106303816	0.34	1.72	2.3388	1e-05	Up	1.91e-06	multidrug resistance protein 2-like isoform X2 [Brassica oleracea var. oleracea]
LOC106299179	0.71	3.58	2.33407	8.99e-08	Up	1.31e-08	B3 domain-containing protein REM20-like isoform X1 [Brassica napus]
LOC106333187	1.27	6.39	2.33099	5.17e-11	Up	5.5e-12	LOB domain-containing protein 11-like [Brassica oleracea var. oleracea]
LOC106335543	0.37	1.86	2.32971	2.58e-05	Up	5.25e-06	probable sodium/metabolite cotransporter BASS5, chloroplastic [Brassica oleracea var. oleracea]
LOC106306435	29.93	150.34	2.32857	0	Up	0	allene oxide synthase 2 [Brassica rapa]
LOC106328303	0.54	2.71	2.32726	0.000214204	Up	5.1e-05	uncharacterized protein LOC106328303 isoform X1 [Brassica oleracea var. oleracea]
LOC106309746	4.01	20.07	2.32337	7.11e-44	Up	1.96e-45	quercetin 3-O-methyltransferase 1-like [Brassica oleracea var. oleracea]
LOC106298331	1.88	9.4	2.32193	6.88e-25	Up	3.25e-26	CDY28844.1|//BnaC06g26320D [Brassica napus]
LOC106302052	0.17	0.85	2.32193	3.64e-05	Up	7.6e-06	ATPase 2, plasma membrane-type-like isoform X2 [Brassica oleracea var. oleracea]
LOC106293430	0.65	3.25	2.32193	7.08e-06	Up	1.32e-06	probable WRKY transcription factor 62 [Brassica oleracea var. oleracea]
LOC106339304	1.76	8.8	2.32193	5.1e-31	Up	1.96e-32	auxin response factor 11 [Brassica oleracea var. oleracea]
LOC106324637	1	4.99	2.31904	1.27e-14	Up	1.03e-15	methylthioalkylmalate synthase 1, chloroplastic-like [Brassica rapa]
LOC106336905	0.46	2.29	2.31564	2.46e-08	Up	3.36e-09	uncharacterized protein LOC106336905 [Brassica oleracea var. oleracea]
LOC106327115	2.34	11.64	2.31451	7.61e-23	Up	3.9e-24	uncharacterized protein LOC106327115 [Brassica oleracea var. oleracea]
LOC106293323	1.54	7.65	2.31253	1.91e-18	Up	1.22e-19	uncharacterized protein LOC106293323 isoform X2 [Brassica oleracea var. oleracea]
LOC106329620	0.84	4.17	2.31159	0.000783911	Up	0.000207728	18 kDa seed maturation protein-like [Brassica oleracea var. oleracea]
LOC106339412	1.38	6.85	2.31144	3.44e-15	Up	2.69e-16	plant cysteine oxidase 2 [Brassica oleracea var. oleracea]
LOC106303861	17.51	86.91	2.31134	1.39e-160	Up	9.3e-163	protein SULFUR DEFICIENCY-INDUCED 1-like [Brassica oleracea var. oleracea]
LOC106293486	1.86	9.21	2.3079	2.26e-11	Up	2.33e-12	MLP-like protein 328 [Brassica oleracea var. oleracea]
LOC106305006	1.64	8.11	2.30601	1.82e-09	Up	2.22e-10	CDX77718.1|//BnaC07g19720D [Brassica napus]
LOC106323568	16.87	83.05	2.29952	4.7e-158	Up	3.23e-160	polygalacturonase inhibitor 1-like [Brassica oleracea var. oleracea]
LOC106299086	1.93	9.5	2.29933	2.05e-07	Up	3.12e-08	uncharacterized protein LOC106299086 [Brassica oleracea var. oleracea]
LOC106323076	0.76	3.72	2.29123	8.44e-07	Up	1.39e-07	myb-like protein D [Brassica napus]
LOC106331319	1.04	5.09	2.29108	2.93e-09	Up	3.63e-10	cyclin-dependent kinase B1-2 [Brassica oleracea var. oleracea]
LOC106335238	0.59	2.87	2.28226	2.93e-09	Up	3.63e-10	TBC1 domain family member 15-like isoform X2 [Brassica oleracea var. oleracea]
LOC106331647	0.56	2.72	2.28011	8.44e-07	Up	1.39e-07	NAC domain-containing protein 82-like [Brassica napus]
LOC106301057	0.72	3.49	2.27716	7.87e-08	Up	1.14e-08	nuclear transcription factor Y subunit A-5 [Brassica oleracea var. oleracea]
LOC106332586	0.72	3.49	2.27716	0.000239199	Up	5.75e-05	chaperone protein dnaJ 11, chloroplastic-like [Brassica oleracea var. oleracea]
LOC106322249	13.03	63.12	2.27626	1.29e-17	Up	8.67e-19	V-type proton ATPase subunit G1-like, partial [Brassica oleracea var. oleracea]
LOC106314712	0.48	2.32	2.27302	6.55e-05	Up	1.42e-05	uncharacterized protein LOC106314712 [Brassica oleracea var. oleracea]
LOC106301337	1.43	6.9	2.27058	1.34e-18	Up	8.54e-20	uncharacterized protein LOC106301337 [Brassica oleracea var. oleracea]
LOC106341764	0.16	0.77	2.26679	0.000378333	Up	9.43e-05	uncharacterized protein LOC106341764 [Brassica oleracea var. oleracea]
LOC106344269	0.61	2.93	2.26402	7.8e-06	Up	1.46e-06	dirigent protein 25-like [Brassica oleracea var. oleracea]
LOC106323393	0.33	1.58	2.25939	4.93e-06	Up	8.97e-07	homeobox protein ATH1-like [Brassica oleracea var. oleracea]
LOC106300599	0.23	1.1	2.2578	6.55e-05	Up	1.42e-05	probable serine/threonine-protein kinase At1g09600 [Brassica oleracea var. oleracea]
LOC106343565	0.71	3.39	2.25539	3.79e-10	Up	4.34e-11	myosin-binding protein 7-like [Brassica oleracea var. oleracea]
LOC106297387	0.13	0.62	2.25376	2.3e-07	Up	3.53e-08	uncharacterized protein LOC106297387 [Brassica oleracea var. oleracea]
LOC106342488	1.58	7.52	2.25081	2.06e-17	Up	1.41e-18	probable sugar phosphate/phosphate translocator At2g25520 [Brassica oleracea var. oleracea]
LOC106309641	1.98	9.41	2.24869	9.99e-15	Up	8.05e-16	uncharacterized protein LOC106309641 [Brassica oleracea var. oleracea]
LOC106304207	2.76	13.09	2.24573	1.16e-12	Up	1.08e-13	S-alkyl-thiohydroximate lyase SUR1-like [Brassica napus]
LOC106325266	0.23	1.09	2.24462	0.000875307	Up	0.000234272	UDP-N-acetylglucosamine diphosphorylase 1-like isoform X2 [Brassica oleracea var. oleracea]
LOC106306287	0.38	1.8	2.24393	0.000378422	Up	9.43e-05	protein LIGHT-DEPENDENT SHORT HYPOCOTYLS 1-like [Brassica oleracea var. oleracea]
LOC106332087	3.38	16	2.24298	1.29e-32	Up	4.73e-34	small RNA degrading nuclease 2-like [Brassica oleracea var. oleracea]
LOC106298788	0.92	4.35	2.24131	1.49e-10	Up	1.65e-11	growth-regulating factor 4-like [Brassica oleracea var. oleracea]
LOC106298339	0.83	3.9	2.23229	2.14e-06	Up	3.7e-07	pathogenesis-related protein 5-like [Brassica oleracea var. oleracea]
LOC106301130	0.88	4.13	2.23057	6.44e-11	Up	6.93e-12	probable receptor-like protein kinase At1g33260 [Brassica oleracea var. oleracea]
LOC106333378	0.63	2.95	2.22729	0.000378377	Up	9.43e-05	transcription factor bHLH36-like [Brassica oleracea var. oleracea]
LOC106298941	1.19	5.55	2.22153	6.44e-11	Up	6.93e-12	CDY38582.1|//BnaC06g30050D [Brassica napus]
LOC106328207	142.8	665.18	2.21975	0	Up	0	jacalin-related lectin 22-like [Brassica oleracea var. oleracea]
LOC106331344	1.9	8.83	2.21641	5.86e-17	Up	4.13e-18	delta-9 acyl-lipid desaturase 2-like [Brassica oleracea var. oleracea]
LOC106328840	0.42	1.94	2.20759	0.000875403	Up	0.000234272	nuclear transcription factor Y subunit A-5-like [Brassica oleracea var. oleracea]
LOC106340191	0.76	3.5	2.20328	9.25e-07	Up	1.53e-07	protein POLYCHOME [Brassica oleracea var. oleracea]
LOC106319184	43.81	201.44	2.20102	0	Up	0	myrosinase-like [Brassica oleracea var. oleracea]
LOC106308135	2.2	10.11	2.20021	1.35e-16	Up	9.77e-18	tetraketide alpha-pyrone reductase 1-like [Brassica oleracea var. oleracea]
LOC106328432	0.76	3.49	2.19916	3.39e-06	Up	6.02e-07	ethylene-responsive transcription factor RAP2-3-like [Brassica oleracea var. oleracea]
LOC106316184	5.23	23.88	2.19092	7.48e-33	Up	2.73e-34	peptide methionine sulfoxide reductase A2 [Brassica oleracea var. oleracea]
LOC106339259	0.45	2.05	2.18763	6.29e-07	Up	1.02e-07	CDY15388.1|//BnaC04g42350D [Brassica napus]
LOC106339924	28.23	128.52	2.18669	4.95e-109	Up	5.09e-111	defensin-like protein 197 [Brassica oleracea var. oleracea]
LOC106342952	5.28	23.99	2.18382	5.12e-33	Up	1.86e-34	HVA22-like protein d [Brassica oleracea var. oleracea]
LOC106292165	0.54	2.45	2.18175	9.56e-10	Up	1.14e-10	tRNA (cytosine(34)-C(5))-methyltransferase [Brassica oleracea var. oleracea]
LOC106322633	1.5	6.8	2.18057	1.35e-19	Up	8.15e-21	LOW QUALITY PROTEIN: protein NUCLEAR FUSION DEFECTIVE 4 [Brassica oleracea var. oleracea]
LOC106331876	45.75	207.24	2.17946	1.38e-232	Up	6.2e-235	CDY71303.1|//BnaCnng72290D,partial [Brassica napus]
LOC106302127	0.22	0.99	2.16993	1.93e-05	Up	3.86e-06	kinesin-4-like [Brassica oleracea var. oleracea]
LOC106304956	0.68	3.06	2.16993	1.79e-05	Up	3.56e-06	CDY32180.1|//BnaCnng06890D [Brassica napus]
LOC106343424	3.2	14.38	2.16792	1.13e-42	Up	3.23e-44	phosphoethanolamine N-methyltransferase 1 [Brassica oleracea var. oleracea]
LOC106301762	8.4	37.7	2.1661	1.47e-107	Up	1.53e-109	protein NRT1/ PTR FAMILY 5.16-like [Brassica oleracea var. oleracea]
LOC106324950	2.72	12.19	2.16402	2.91e-21	Up	1.61e-22	protein SULFUR DEFICIENCY-INDUCED 1-like [Brassica oleracea var. oleracea]
LOC106334311	0.77	3.45	2.16367	7.11e-14	Up	6.04e-15	inactive protein kinase SELMODRAFT_444075 isoform X1 [Brassica oleracea var. oleracea]
LOC106313839	3.2	14.3	2.15987	1.4e-29	Up	5.58e-31	zinc-finger homeodomain protein 9-like [Brassica oleracea var. oleracea]
LOC106314020	0.28	1.25	2.15843	7.04e-05	Up	1.54e-05	uncharacterized protein LOC106314020 [Brassica oleracea var. oleracea]
LOC106324945	9.66	43.06	2.15625	2.41e-40	Up	7.22e-42	non-specific lipid-transfer protein 4-like [Brassica rapa]
LOC106337461	7.08	31.52	2.15445	2.23e-73	Up	3.52e-75	probable inactive patatin-like protein 9 isoform X2 [Brassica oleracea var. oleracea]
LOC106316233	2.46	10.95	2.1542	5.48e-19	Up	3.42e-20	uncharacterized protein LOC106316233 [Brassica oleracea var. oleracea]
LOC106300854	16.94	75.38	2.15375	2.48e-187	Up	1.42e-189	protein STRICTOSIDINE SYNTHASE-LIKE 9-like [Brassica oleracea var. oleracea]
LOC106294185	5.83	25.92	2.1525	1.3e-57	Up	2.68e-59	F-box protein At1g30790-like [Brassica oleracea var. oleracea]
LOC106342399	14.44	63.93	2.14642	2.25e-57	Up	4.66e-59	cysteine proteinase inhibitor 3-like [Brassica oleracea var. oleracea]
LOC106333964	0.69	3.05	2.14414	1.52e-15	Up	1.16e-16	lysosomal Pro-X carboxypeptidase-like [Brassica oleracea var. oleracea]
LOC106298337	0.99	4.36	2.13883	6.51e-10	Up	7.6e-11	transcription factor bHLH30 [Brassica oleracea var. oleracea]
LOC106306884	17.98	79.07	2.13674	3.87e-152	Up	2.81e-154	epithiospecifier protein-like [Brassica oleracea var. oleracea]
LOC106332515	1.05	4.61	2.13438	2.52e-07	Up	3.89e-08	ubiquitin-conjugating enzyme E2 2-like [Brassica oleracea var. oleracea]
LOC106300708	2.48	10.87	2.13194	2.69e-22	Up	1.41e-23	alcohol dehydrogenase class-P [Brassica oleracea var. oleracea]
LOC106296230	57.28	250.87	2.13084	0	Up	0	TSK-associating protein 1-like [Brassica oleracea var. oleracea]
LOC106315879	0.53	2.32	2.13006	0.000110154	Up	2.49e-05	probable membrane-associated kinase regulator 1 [Brassica oleracea var. oleracea]
LOC106307423	1.83	8.01	2.12996	2.81e-13	Up	2.5e-14	uncharacterized protein LOC106307109 [Brassica oleracea var. oleracea]
LOC106326799	3.59	15.71	2.12963	3.18e-20	Up	1.86e-21	ethylene-responsive transcription factor ERF039 [Brassica oleracea var. oleracea]
LOC106342610	0.16	0.7	2.12928	7.04e-05	Up	1.54e-05	ABC transporter B family member 4-like [Brassica oleracea var. oleracea]
LOC106342019	1.93	8.44	2.12864	8.86e-15	Up	7.11e-16	cinnamoyl-CoA reductase 2-like [Brassica napus]
LOC106310782	1.07	4.67	2.12581	5.83e-07	Up	9.4e-08	CDY42167.1|//BnaC05g40520D [Brassica napus]
LOC106311732	11.16	48.7	2.12559	1.15e-75	Up	1.74e-77	methylesterase 9-like [Brassica oleracea var. oleracea]
LOC106328508	3.51	15.31	2.12493	7.08e-40	Up	2.16e-41	fasciclin-like arabinogalactan protein 16 [Brassica oleracea var. oleracea]
LOC106309465	0.78	3.4	2.12399	3.04e-05	Up	6.25e-06	putative protease Do-like 14 isoform X2 [Brassica napus]
LOC106328714	0.83	3.6	2.11681	5.12e-11	Up	5.45e-12	internal alternative NAD(P)H-ubiquinone oxidoreductase A2, mitochondrial [Brassica oleracea var. oleracea]
LOC106313152	0.69	2.99	2.11548	3.6e-06	Up	6.44e-07	histone-lysine N-methyltransferase ASHR2 [Brassica oleracea var. oleracea]
LOC106336937	1	4.33	2.11437	1.31e-05	Up	2.54e-06	glycine-rich RNA-binding protein GRP2A [Brassica oleracea var. oleracea]
LOC106343262	0.71	3.07	2.11235	0.00011014	Up	2.49e-05	uncharacterized protein LOC106343262 [Brassica oleracea var. oleracea]
LOC106339885	0.31	1.34	2.11189	0.000549339	Up	0.000141624	taxadien-5-alpha-ol O-acetyltransferase [Brassica oleracea var. oleracea]
LOC106329131	0.26	1.12	2.10691	2.84e-05	Up	5.83e-06	proline-, glutamic acid- and leucine-rich protein 1 [Brassica oleracea var. oleracea]
LOC106340517	3.5	15.04	2.10338	2.53e-09	Up	3.13e-10	cytosolic sulfotransferase 11-like [Brassica oleracea var. oleracea]
LOC106327211	0.94	4.03	2.10005	1.1e-12	Up	1.02e-13	enhanced disease susceptibility 5 [Brassica oleracea var. oleracea]
LOC106328688	0.18	0.77	2.09686	0.000264994	Up	6.42e-05	probable sucrose-phosphate synthase 2 [Brassica oleracea var. oleracea]
LOC106294137	4.29	18.3	2.09279	1.48e-14	Up	1.21e-15	uncharacterized protein LOC106294137 [Brassica oleracea var. oleracea]
LOC106304575	1.21	5.16	2.09236	2.98e-08	Up	4.12e-09	uncharacterized protein LOC106304575 [Brassica oleracea var. oleracea]
LOC106300698	0.75	3.19	2.08859	2.56e-15	Up	1.99e-16	uncharacterized protein LOC106389750 [Brassica napus]
LOC106306647	6.62	28.12	2.08669	2.45e-64	Up	4.49e-66	CDY66399.1|//BnaA07g37340D [Brassica napus]
LOC106325697	1.59	6.74	2.08372	9.23e-09	Up	1.21e-09	uncharacterized protein LOC106325697 [Brassica oleracea var. oleracea]
LOC106334388	4.17	17.67	2.08318	1.27e-38	Up	4e-40	BAHD acyltransferase At3g29680-like [Brassica oleracea var. oleracea]
LOC106336896	3.39	14.36	2.0827	3.69e-48	Up	9.28e-50	serine/threonine-protein kinase D6PKL1-like [Brassica oleracea var. oleracea]
LOC106326675	4.9	20.74	2.08156	4.73e-38	Up	1.51e-39	splicing factor U2af small subunit B-like [Brassica napus]
LOC106332457	0.95	4.02	2.0812	1.72e-07	Up	2.6e-08	adenylyl-sulfate kinase 2, chloroplastic [Brassica oleracea var. oleracea]
LOC106318858	1.09	4.61	2.08044	6.65e-07	Up	1.08e-07	uncharacterized protein At4g08330, chloroplastic [Brassica oleracea var. oleracea]
LOC106320626	0.94	3.97	2.07841	2.03e-05	Up	4.07e-06	putative F-box protein At1g46984 [Brassica oleracea var. oleracea]
LOC106311788	1.99	8.38	2.07418	2.31e-11	Up	2.39e-12	auxin-responsive protein IAA3-like [Brassica oleracea var. oleracea]
LOC106310088	2.41	10.14	2.07295	7.58e-11	Up	8.18e-12	uncharacterized protein LOC106310088 [Brassica oleracea var. oleracea]
LOC106296986	0.58	2.44	2.07276	0.000110111	Up	2.49e-05	axial regulator YABBY 1 isoform X2 [Brassica oleracea var. oleracea]
LOC106332563	0.94	3.95	2.07112	0.000110126	Up	2.49e-05	uncharacterized protein LOC106332563 [Brassica oleracea var. oleracea]
LOC106330753	0.21	0.88	2.06711	0.000163259	Up	3.81e-05	uncharacterized protein LOC106330753 [Brassica oleracea var. oleracea]
LOC106308923	2.2	9.2	2.06413	2.31e-11	Up	2.39e-12	uncharacterized protein LOC106308923 [Brassica oleracea var. oleracea]
LOC106305690	2.44	10.2	2.06362	6.17e-43	Up	1.74e-44	probable disease resistance protein At5g66900 [Brassica oleracea var. oleracea]
LOC106296711	5.91	24.65	2.06036	4.36e-43	Up	1.22e-44	NAC domain-containing protein 19 [Brassica oleracea var. oleracea]
LOC106302270	0.72	3	2.05889	4.44e-07	Up	7.06e-08	F-box/FBD/LRR-repeat protein At3g26920-like [Brassica oleracea var. oleracea]
LOC106315996	0.44	1.83	2.05627	2.03e-05	Up	4.07e-06	tyrosine decarboxylase 1 [Brassica oleracea var. oleracea]
LOC106339234	4.9	20.32	2.05205	3.11e-10	Up	3.52e-11	uncharacterized protein LOC106339234 [Brassica oleracea var. oleracea]
LOC106328102	1.8	7.46	2.05118	2.8e-21	Up	1.55e-22	interactor of constitutive active ROPs 3-like [Brassica oleracea var. oleracea]
LOC106307708	5.62	23.26	2.04921	1.76e-55	Up	3.81e-57	probable pectate lyase 12 [Brassica oleracea var. oleracea]
LOC106292952	1.91	7.88	2.04462	2.65e-09	Up	3.28e-10	single-stranded DNA-binding protein, mitochondrial [Brassica oleracea var. oleracea]
LOC106308062	0.24	0.99	2.04439	9.93e-12	Up	9.92e-13	uncharacterized protein LOC106308062 [Brassica oleracea var. oleracea]
LOC106334812	16.23	66.71	2.03924	7.05e-128	Up	6.13e-130	cystine lyase CORI3-like [Brassica oleracea var. oleracea]
LOC106329043	19.09	78.46	2.03914	1.81e-114	Up	1.79e-116	gibberellin-regulated protein 14-like isoform X1 [Brassica napus]
LOC106329055	2.68	11	2.0372	9.83e-29	Up	4.04e-30	WEB family protein At2g38370 [Brassica oleracea var. oleracea]
LOC106313624	0.29	1.19	2.03684	1.35e-05	Up	2.64e-06	uncharacterized protein LOC106313624 [Brassica oleracea var. oleracea]
LOC106327795	0.42	1.72	2.03395	0.000113692	Up	2.58e-05	cysteine proteinase RD21a-like [Brassica oleracea var. oleracea]
LOC106304272	0.43	1.76	2.03317	1.61e-06	Up	2.75e-07	MORC family CW-type zinc finger protein 4-like [Brassica oleracea var. oleracea]
LOC106337393	13.04	53.37	2.03308	1.46e-95	Up	1.74e-97	proline-rich protein 2 [Brassica oleracea var. oleracea]
LOC106342202	2.47	10.08	2.02891	9.37e-20	Up	5.6e-21	UDP-arabinopyranose mutase 1-like [Brassica oleracea var. oleracea]
LOC106292574	2.52	10.26	2.02554	1.7e-17	Up	1.16e-18	uncharacterized protein LOC106292574 [Brassica oleracea var. oleracea]
LOC106325035	0.49	1.99	2.02191	3.16e-05	Up	6.52e-06	transcription factor bHLH96-like isoform X1 [Brassica oleracea var. oleracea]
LOC106304414	1.48	6.01	2.02177	1.55e-11	Up	1.58e-12	uncharacterized protein LOC106304414 [Brassica oleracea var. oleracea]
LOC106315676	2.96	12.01	2.02057	6.5e-20	Up	3.86e-21	uncharacterized protein LOC106404528 [Brassica napus]
LOC106327677	1.36	5.51	2.01845	2.72e-12	Up	2.59e-13	thiol protease aleurain-like [Brassica oleracea var. oleracea]
LOC106296651	0.42	1.7	2.01707	0.000171317	Up	4.01e-05	probable pectate lyase 5 [Brassica oleracea var. oleracea]
LOC106331849	0.92	3.72	2.0156	1.25e-12	Up	1.16e-13	probable sulfate transporter 4.2 [Brassica oleracea var. oleracea]
LOC106303755	7.61	30.74	2.01415	2.63e-44	Up	7.2e-46	mitochondrial outer membrane protein porin 2 isoform X2 [Brassica oleracea var. oleracea]
LOC106339991	0.59	2.38	2.01218	0.000113707	Up	2.58e-05	uncharacterized protein LOC106339991 [Brassica oleracea var. oleracea]
LOC106331955	134.02	539.35	2.00877	0	Up	0	endochitinase CH25-like [Brassica oleracea var. oleracea]
LOC106342870	0.97	3.9	2.00742	1.97e-15	Up	1.52e-16	U-box domain-containing protein 4-like [Brassica oleracea var. oleracea]
LOC106328540	6	24.05	2.003	1.15e-53	Up	2.58e-55	protein ASPARTIC PROTEASE IN GUARD CELL 2-like [Brassica oleracea var. oleracea]
LOC106320407	0.9	3.6	2	1.55e-06	Up	2.63e-07	probable WRKY transcription factor 70 isoform X2 [Brassica oleracea var. oleracea]
LOC106322882	0.38	1.52	2	0.000398485	Up	9.99e-05	GDSL esterase/lipase At5g22810 [Brassica oleracea var. oleracea]
LOC106335528	0.67	2.68	2	0.000171339	Up	4.01e-05	nudix hydrolase 25-like [Brassica oleracea var. oleracea]
LOC106312893	0.76	3.03	1.99525	0.000955505	Up	0.00025741	high mobility group B protein 7 [Brassica oleracea var. oleracea]
LOC106331508	1.45	5.78	1.99502	5.65e-11	Up	6.03e-12	biotin synthase-like [Brassica oleracea var. oleracea]
LOC106312673	0.54	2.15	1.99331	2.32e-08	Up	3.17e-09	CDX86489.1|//BnaC08g02140D [Brassica napus]
LOC106325923	1.1	4.37	1.99013	7.05e-07	Up	1.15e-07	uncharacterized protein At5g39865-like [Brassica oleracea var. oleracea]
LOC106330776	1.49	5.91	1.98785	0.000624178	Up	0.000162704	hydrophobic protein RCI2B-like [Brassica rapa]
LOC106300239	0.26	1.03	1.98606	0.000955608	Up	0.00025741	zinc finger BED domain-containing protein RICESLEEPER 1-like [Brassica oleracea var. oleracea]
LOC106305743	2.33	9.22	1.98444	2.53e-19	Up	1.55e-20	thaumatin-like protein 1b [Brassica oleracea var. oleracea]
LOC106308449	13.4	52.94	1.98212	7.26e-189	Up	4.05e-191	membrane protein of ER body-like protein isoform X1 [Brassica oleracea var. oleracea]
LOC106329483	9.45	37.31	1.98118	9.76e-80	Up	1.4e-81	E3 ubiquitin-protein ligase PUB23 [Brassica oleracea var. oleracea]
LOC106308009	0.37	1.46	1.98037	0.000407506	Up	0.000102453	cytochrome P450 71B28-like [Brassica oleracea var. oleracea]
LOC106303647	0.54	2.13	1.97982	3.22e-05	Up	6.65e-06	DNA repair protein recA homolog 3, mitochondrial isoform X1 [Brassica oleracea var. oleracea]
LOC106341818	3.01	11.87	1.97948	1.54e-27	Up	6.58e-29	beta-glucosidase 15-like [Brassica oleracea var. oleracea]
LOC106294540	0.63	2.47	1.97109	1.09e-06	Up	1.82e-07	CDY04799.1|//BnaC05g17900D [Brassica napus]
LOC106302142	14.76	57.64	1.96538	7.44e-68	Up	1.27e-69	RING-H2 finger protein ATL45-like [Brassica oleracea var. oleracea]
LOC106332332	4.83	18.86	1.96524	1.1e-19	Up	6.63e-21	uncharacterized protein LOC106332332 [Brassica oleracea var. oleracea]
LOC106327784	0.93	3.63	1.96467	1.68e-19	Up	1.02e-20	cellulose synthase-like protein D2 [Brassica oleracea var. oleracea]
LOC106309853	1.7	6.63	1.96347	2.96e-07	Up	4.59e-08	uncharacterized protein LOC106309853 [Brassica oleracea var. oleracea]
LOC106321605	2.41	9.38	1.96056	2.09e-26	Up	9.26e-28	cyclin-A2-4-like isoform X1 [Brassica oleracea var. oleracea]
LOC106337457	52.38	203.82	1.96021	2.59e-116	Up	2.5e-118	defensin-like protein 2 [Brassica oleracea var. oleracea]
LOC106340495	5.45	21.15	1.95633	1.68e-11	Up	1.72e-12	cytosolic sulfotransferase 11-like [Brassica oleracea var. oleracea]
LOC106311496	0.65	2.52	1.95491	1.98e-12	Up	1.88e-13	RRP12-like protein [Brassica oleracea var. oleracea]
LOC106324802	0.73	2.83	1.95483	4.92e-05	Up	1.05e-05	homeobox-leucine zipper protein ATHB-13-like [Brassica oleracea var. oleracea]
LOC106306670	5.22	20.19	1.95152	1.65e-109	Up	1.69e-111	structural maintenance of chromosomes protein 4 [Brassica oleracea var. oleracea]
LOC106336212	1.79	6.92	1.95081	4.65e-07	Up	7.4e-08	non-specific lipid-transfer protein-like protein At2g13820 [Brassica oleracea var. oleracea]
LOC106320678	5	19.32	1.95009	1.47e-44	Up	4.01e-46	putative E3 ubiquitin-protein ligase XBAT31 [Brassica oleracea var. oleracea]
LOC106312840	54.59	210.8	1.94917	0	Up	0	uncharacterized protein LOC106312840 [Brassica oleracea var. oleracea]
LOC106325510	2.89	11.13	1.94531	1.74e-14	Up	1.43e-15	protein TIFY 9-like isoform X1 [Brassica oleracea var. oleracea]
LOC106315807	29.57	113.86	1.94505	1.61e-84	Up	2.2e-86	hypothetical protein EUTSA_v10014731mg [Eutrema salsugineum]
LOC106308600	1.26	4.84	1.94158	1.87e-17	Up	1.27e-18	protein STRUBBELIG-RECEPTOR FAMILY 8 [Brassica oleracea var. oleracea]
LOC106320873	422.53	1621.56	1.94026	0	Up	0	kunitz-type serine protease inhibitor DrTI-like [Brassica napus]
LOC106341597	0.43	1.65	1.94006	0.000174924	Up	4.1e-05	RING-H2 finger protein ATL46-like [Brassica napus]
LOC106310744	0.3	1.15	1.9386	0.00017136	Up	4.01e-05	LOW QUALITY PROTEIN: tetratricopeptide repeat protein 7A-like [Brassica oleracea var. oleracea]
LOC106327039	4.44	17.02	1.9386	2.95e-17	Up	2.03e-18	protein LURP-one-related 10 [Brassica oleracea var. oleracea]
LOC106312799	0.23	0.88	1.93587	3.76e-06	Up	6.74e-07	ABC transporter G family member 35 [Brassica oleracea var. oleracea]
LOC106334597	0.96	3.67	1.93467	2.51e-16	Up	1.84e-17	retinoblastoma-related protein 1-like isoform X1 [Brassica oleracea var. oleracea]
LOC106340132	0.43	1.64	1.93129	0.000407553	Up	0.000102453	FBD-associated F-box protein At2g26860-like [Brassica oleracea var. oleracea]
LOC106326941	3.16	12.05	1.93104	7.49e-49	Up	1.87e-50	alpha-glucan phosphorylase 1-like isoform X2 [Brassica oleracea var. oleracea]
LOC106329313	4.43	16.86	1.92823	1.5e-38	Up	4.74e-40	uncharacterized protein LOC106329313 [Brassica oleracea var. oleracea]
LOC106343038	0.46	1.75	1.92765	4.66e-07	Up	7.43e-08	helicase sen1-like [Brassica oleracea var. oleracea]
LOC106325171	0.87	3.3	1.92338	0.000407459	Up	0.000102453	soluble inorganic pyrophosphatase-like [Brassica rapa]
LOC106325121	1.64	6.22	1.92322	4.38e-09	Up	5.52e-10	uncharacterized protein At1g32220, chloroplastic [Brassica oleracea var. oleracea]
LOC106300426	1.58	5.99	1.92263	3.05e-07	Up	4.75e-08	uncharacterized protein LOC106300426 [Brassica oleracea var. oleracea]
LOC106322838	0.67	2.54	1.9226	1.38e-05	Up	2.7e-06	fe(2+) transport protein 3, chloroplastic-like [Brassica oleracea var. oleracea]
LOC106303695	0.47	1.78	1.92115	0.000407703	Up	0.000102443	AT-hook motif nuclear-localized protein 2 [Brassica oleracea var. oleracea]
LOC106304140	0.72	2.72	1.91754	2.39e-08	Up	3.27e-09	cytochrome P450 86B1 [Brassica oleracea var. oleracea]
LOC106306246	1.33	5.02	1.91626	1.78e-19	Up	1.08e-20	alpha,alpha-trehalose-phosphate synthase [UDP-forming] 5 [Brassica oleracea var. oleracea]
LOC106327715	0.75	2.83	1.91584	7.12e-07	Up	1.16e-07	ethylene-responsive transcription factor CRF2-like [Brassica oleracea var. oleracea]
LOC106341782	1.88	7.08	1.91302	1.12e-11	Up	1.12e-12	peroxidase 30 [Brassica oleracea var. oleracea]
LOC106304128	5.12	19.27	1.91214	1.36e-20	Up	7.79e-22	HVA22-like protein d [Brassica oleracea var. oleracea]
LOC106323047	3.71	13.96	1.91181	8.92e-53	Up	2.05e-54	protein DEFECTIVE IN EXINE FORMATION 1 [Brassica oleracea var. oleracea]
LOC106304386	0.63	2.37	1.91146	0.000175033	Up	4.1e-05	protein CHROMOSOME TRANSMISSION FIDELITY 7 [Brassica oleracea var. oleracea]
LOC106340573	0.7	2.63	1.90964	7.51e-05	Up	1.65e-05	uncharacterized protein LOC106340573 [Brassica oleracea var. oleracea]
LOC106322623	5.4	20.28	1.90903	9.84e-36	Up	3.33e-37	CDY47794.1|//BnaC01g22500D [Brassica napus]
LOC106320814	0.94	3.53	1.90894	4.66e-07	Up	7.43e-08	endoglucanase 11-like isoform X1 [Brassica oleracea var. oleracea]
LOC106336854	5.48	20.55	1.90689	3.22e-49	Up	8.01e-51	endoglucanase 11 [Brassica oleracea var. oleracea]
LOC106343650	0.24	0.9	1.90689	0.000407608	Up	0.000102443	putative pentatricopeptide repeat-containing protein At1g13630 [Brassica oleracea var. oleracea]
LOC106307901	1.38	5.16	1.9027	4.02e-11	Up	4.23e-12	probable GTP-binding protein OBGM, mitochondrial [Brassica napus]
LOC106310146	8.63	32.24	1.90142	9.99e-36	Up	3.38e-37	glutathione S-transferase U25-like [Brassica oleracea var. oleracea]
LOC106324923	0.67	2.5	1.89969	3.05e-07	Up	4.74e-08	DEAD-box ATP-dependent RNA helicase 51-like isoform X2 [Brassica oleracea var. oleracea]
LOC106310392	0.93	3.47	1.89963	0.000174989	Up	4.1e-05	transmembrane protein 18-like [Brassica oleracea var. oleracea]
LOC106327788	5.39	20.08	1.8974	9.85e-19	Up	6.25e-20	GPI-anchored protein LORELEI-like [Brassica oleracea var. oleracea]
LOC106307798	0.93	3.46	1.89547	1.37e-05	Up	2.67e-06	uncharacterized protein LOC106307798 isoform X1 [Brassica oleracea var. oleracea]
LOC106300691	0.67	2.49	1.89391	0.000407655	Up	0.000102443	uncharacterized protein LOC106300691 [Brassica oleracea var. oleracea]
LOC106315127	0.88	3.27	1.89372	2.04e-12	Up	1.93e-13	protein argonaute 9-like [Brassica oleracea var. oleracea]
LOC106311742	2.46	9.14	1.89354	3.66e-35	Up	1.26e-36	auxin response factor 5-like [Brassica oleracea var. oleracea]
LOC106298272	2.33	8.64	1.8907	1.2e-14	Up	9.74e-16	isoflavone reductase homolog P3 [Brassica oleracea var. oleracea]
LOC106328716	0.34	1.26	1.88982	0.000113995	Up	2.59e-05	protein STRUBBELIG-RECEPTOR FAMILY 8 isoform X3 [Brassica oleracea var. oleracea]
LOC106344079	2.04	7.56	1.88982	2.39e-08	Up	3.27e-09	monothiol glutaredoxin-S15, mitochondrial [Brassica oleracea var. oleracea]
LOC106336490	0.34	1.26	1.88982	0.00011398	Up	2.59e-05	putative pentatricopeptide repeat-containing protein At3g15130 [Brassica oleracea var. oleracea]
LOC106335750	4.08	15.12	1.88982	2.14e-49	Up	5.29e-51	BEL1-like homeodomain protein 1 isoform X2 [Brassica oleracea var. oleracea]
LOC106309994	0.88	3.26	1.8893	4.92e-05	Up	1.05e-05	protein YLS9-like [Brassica rapa]
LOC106319971	873.9	3236.98	1.88911	0	Up	0	kunitz-type trypsin inhibitor-like 1 protein [Brassica oleracea var. oleracea]
LOC106332547	0.65	2.4	1.88452	4.56e-12	Up	4.42e-13	probable LRR receptor-like serine/threonine-protein kinase At1g29720 isoform X4 [Brassica oleracea var. oleracea]
LOC106304106	1.33	4.91	1.8843	2.39e-08	Up	3.27e-09	lipase 3 [Brassica oleracea var. oleracea]
LOC106343665	0.67	2.47	1.88228	8.97e-06	Up	1.7e-06	E3 ubiquitin-protein ligase BAH1-like [Brassica oleracea var. oleracea]
LOC106293006	1.08	3.98	1.88174	4.87e-05	Up	1.04e-05	auxin-responsive protein IAA19-like [Brassica oleracea var. oleracea]
LOC106337586	0.94	3.46	1.88004	5.18e-10	Up	6.01e-11	probable inactive leucine-rich repeat receptor-like protein kinase At1g66830 [Brassica oleracea var. oleracea]
LOC106326949	2.44	8.98	1.87983	3.2e-37	Up	1.05e-38	ATPase 11, plasma membrane-type [Brassica oleracea var. oleracea]
LOC106309566	1.72	6.33	1.8798	1.56e-08	Up	2.1e-09	germin-like protein subfamily 2 member 1 [Brassica rapa]
LOC106293245	1.47	5.4	1.87714	1.22e-09	Up	1.46e-10	protein PAIR1 isoform X2 [Brassica oleracea var. oleracea]
LOC106320227	0.75	2.75	1.87447	2.1e-05	Up	4.22e-06	NAC domain-containing protein 69-like isoform X1 [Brassica oleracea var. oleracea]
LOC106328819	28.86	105.78	1.87392	1.35e-164	Up	8.85e-167	hyoscyamine 6-dioxygenase-like [Brassica oleracea var. oleracea]
LOC106325047	7.8	28.57	1.87295	1.17e-36	Up	3.86e-38	high mobility group B protein 7-like [Brassica oleracea var. oleracea]
LOC106298554	2.12	7.76	1.87199	0.000114009	Up	2.59e-05	uncharacterized protein LOC103832446 [Brassica rapa]
LOC106298548	1.73	6.32	1.86915	2.1e-05	Up	4.22e-06	CDY32007.1|//BnaC06g15850D [Brassica napus]
LOC106329455	1.83	6.68	1.868	7.08e-17	Up	5.02e-18	MATE efflux family protein 1 [Brassica oleracea var. oleracea]
LOC106329299	1.28	4.67	1.86728	1.02e-08	Up	1.34e-09	thaumatin-like protein 1b [Brassica oleracea var. oleracea]
LOC106311636	25.86	94.31	1.86669	7.28e-204	Up	3.76e-206	UDP-glucuronic acid decarboxylase 2 [Brassica oleracea var. oleracea]
LOC106316016	1.46	5.32	1.86546	5.61e-13	Up	5.1e-14	phenylalanine N-monooxygenase [Brassica oleracea var. oleracea]
LOC106294663	1.53	5.57	1.86415	1.09e-06	Up	1.82e-07	E3 ubiquitin-protein ligase RNF181 [Brassica oleracea var. oleracea]
LOC106313559	125.38	455.88	1.86235	0	Up	0	cystine lyase CORI3-like [Brassica oleracea var. oleracea]
LOC106322056	3.75	13.63	1.86182	1.03e-13	Up	8.82e-15	glycine-rich RNA-binding protein 2, mitochondrial-like [Brassica napus]
LOC106339987	0.57	2.07	1.8606	0.000407411	Up	0.000102453	novel plant SNARE 11 [Brassica oleracea var. oleracea]
LOC106339939	0.43	1.56	1.85914	0.000407561	Up	0.000102443	uncharacterized protein LOC106339939 [Brassica oleracea var. oleracea]
LOC106343556	0.83	3.01	1.85858	2.37e-08	Up	3.24e-09	pentatricopeptide repeat-containing protein At3g15590, mitochondrial [Brassica oleracea var. oleracea]
LOC106301935	1.04	3.77	1.85798	7.02e-07	Up	1.14e-07	peroxisomal (S)-2-hydroxy-acid oxidase GLO5 [Brassica oleracea var. oleracea]
LOC106320078	0.32	1.16	1.85798	0.000265427	Up	6.43e-05	probable DEAD-box ATP-dependent RNA helicase 48 [Brassica oleracea var. oleracea]
LOC106337397	0.4	1.45	1.85798	9.06e-06	Up	1.72e-06	anaphase-promoting complex subunit 2 isoform X1 [Brassica oleracea var. oleracea]
LOC106330654	1.96	7.1	1.85696	0.000618142	Up	0.000160806	zinc-finger homeodomain protein 9-like [Brassica oleracea var. oleracea]
LOC106300874	1.24	4.49	1.85638	8.47e-29	Up	3.48e-30	jacalin-related lectin 11-like [Brassica napus]
LOC106331770	1.15	4.16	1.85495	1.01e-08	Up	1.33e-09	uncharacterized protein LOC106331770 [Brassica oleracea var. oleracea]
LOC106344112	1.46	5.28	1.85457	2.01e-12	Up	1.9e-13	scarecrow-like protein 29 [Brassica oleracea var. oleracea]
LOC106329545	0.36	1.3	1.85244	0.000265459	Up	6.43e-05	uncharacterized protein LOC106329545 [Brassica oleracea var. oleracea]
LOC106297354	0.99	3.57	1.85042	3.18e-05	Up	6.57e-06	lectin-like protein At1g53070 [Brassica oleracea var. oleracea]
LOC106337844	2.84	10.24	1.85025	1.31e-34	Up	4.59e-36	formin-like protein 2 [Brassica oleracea var. oleracea]
LOC106331969	5.81	20.92	1.84827	7.95e-23	Up	4.08e-24	uncharacterized protein LOC106331969 [Brassica oleracea var. oleracea]
LOC106314392	0.55	1.98	1.848	1.64e-06	Up	2.8e-07	nucleobase-ascorbate transporter 11 [Brassica oleracea var. oleracea]
LOC106297040	0.77	2.77	1.84696	0.000237617	Up	5.7e-05	transcription factor bHLH96 isoform X1 [Brassica oleracea var. oleracea]
LOC106339545	2.98	10.71	1.84557	2.51e-24	Up	1.22e-25	aspartic proteinase-like protein 2 [Brassica oleracea var. oleracea]
LOC106310521	0.97	3.47	1.83888	0.000172394	Up	4.03e-05	ethylene-responsive transcription factor ERF035-like [Brassica oleracea var. oleracea]
LOC106333363	8.1	28.86	1.83308	1.12e-19	Up	6.73e-21	uncharacterized protein LOC106333363 [Brassica oleracea var. oleracea]
LOC106301717	77.86	276.55	1.82859	0	Up	0	cytochrome P450 79B1 [Brassica oleracea var. oleracea]
LOC106306777	0.6	2.13	1.82782	2.53e-06	Up	4.42e-07	CDY59050.1|//BnaC07g48200D [Brassica napus]
LOC106332346	5.72	20.3	1.82739	2.11e-23	Up	1.06e-24	uncharacterized protein LOC106332346 [Brassica oleracea var. oleracea]
LOC106292658	23.93	84.84	1.82592	2.66e-87	Up	3.48e-89	bark lectin isoform 2-like [Brassica oleracea var. oleracea]
LOC106307089	1.78	6.29	1.82118	1.37e-15	Up	1.04e-16	amidophosphoribosyltransferase 1, chloroplastic [Brassica oleracea var. oleracea]
LOC106342562	13.25	46.79	1.82021	9.88e-60	Up	1.95e-61	probable 2-oxoacid dependent dioxygenase [Brassica oleracea var. oleracea]
LOC106301712	7.82	27.61	1.81995	1.09e-39	Up	3.34e-41	cytidine deaminase 1-like [Brassica oleracea var. oleracea]
LOC106306987	250.63	884.81	1.81981	0	Up	0	bark storage protein A-like [Brassica oleracea var. oleracea]
LOC106331276	15.86	55.94	1.81849	2.29e-142	Up	1.78e-144	D-3-phosphoglycerate dehydrogenase 1, chloroplastic-like [Brassica napus]
LOC106331666	0.74	2.61	1.81845	0.000259056	Up	6.26e-05	probable xyloglucan endotransglucosylase/hydrolase protein 32 isoform X2 [Brassica oleracea var. oleracea]
LOC106301768	4.43	15.61	1.81709	4.2e-22	Up	2.24e-23	probable carboxylesterase 7 [Brassica oleracea var. oleracea]
LOC106320394	0.65	2.29	1.81684	7.4e-05	Up	1.63e-05	uncharacterized protein LOC106320394 [Brassica oleracea var. oleracea]
LOC106328942	0.68	2.39	1.8134	4.44e-07	Up	7.06e-08	ribosome biogenesis protein BOP1 homolog [Brassica oleracea var. oleracea]
LOC106326285	1.11	3.9	1.81291	2.37e-08	Up	3.24e-09	protein TRANSPARENT TESTA 12-like [Brassica oleracea var. oleracea]
LOC106304548	1.29	4.53	1.81214	5.77e-06	Up	1.06e-06	DNA replication complex GINS protein SLD5 [Brassica oleracea var. oleracea]
LOC106295701	0.94	3.3	1.81173	2.77e-09	Up	3.43e-10	sodium/hydrogen exchanger 2 [Brassica oleracea var. oleracea]
LOC106301489	3.33	11.69	1.81168	3.66e-24	Up	1.79e-25	probable serine/threonine-protein kinase sky1 [Brassica oleracea var. oleracea]
LOC106309745	12.92	45.35	1.8115	3.49e-53	Up	7.95e-55	short-chain dehydrogenase reductase 3a isoform X2 [Brassica oleracea var. oleracea]
LOC106340384	3.57	12.53	1.81139	1.85e-17	Up	1.26e-18	agamous-like MADS-box protein AGL17 isoform X1 [Brassica oleracea var. oleracea]
LOC106336900	5.11	17.93	1.81098	5.87e-30	Up	2.32e-31	DJ-1 protein homolog E [Brassica oleracea var. oleracea]
LOC106340489	2.02	7.08	1.80939	2.95e-07	Up	4.58e-08	cyclin-dependent protein kinase inhibitor SMR3 [Brassica oleracea var. oleracea]
LOC106324827	53.17	186.13	1.80763	2.73e-113	Up	2.74e-115	defensin-like protein 1 [Brassica oleracea var. oleracea]
LOC106335119	0.26	0.91	1.80736	5.77e-06	Up	1.06e-06	ABC transporter C family member 3 [Brassica oleracea var. oleracea]
LOC106307925	0.9	3.15	1.80736	8.2e-08	Up	1.19e-08	uncharacterized protein At3g49140-like [Brassica oleracea var. oleracea]
LOC106322753	11.85	41.4	1.80474	7.83e-74	Up	1.22e-75	pollen-specific protein SF21-like [Brassica oleracea var. oleracea]
LOC106329333	2.42	8.44	1.80224	6.34e-14	Up	5.36e-15	uncharacterized protein LOC106329333 [Brassica oleracea var. oleracea]
LOC106296770	0.98	3.41	1.79892	1.29e-07	Up	1.92e-08	glyceraldehyde-3-phosphate dehydrogenase GAPCP1, chloroplastic [Brassica oleracea var. oleracea]
LOC106337010	0.86	2.99	1.79774	1.6e-06	Up	2.73e-07	zinc finger CCCH domain-containing protein 25 [Brassica oleracea var. oleracea]
LOC106329141	1.03	3.58	1.79731	3.11e-05	Up	6.4e-06	uncharacterized protein LOC106329141 isoform X1 [Brassica oleracea var. oleracea]
LOC106309674	0.49	1.7	1.79468	0.000111555	Up	2.52e-05	putative methyltransferase NSUN6 [Brassica oleracea var. oleracea]
LOC106343190	0.62	2.15	1.794	1.47e-08	Up	1.97e-09	kinesin-4 isoform X1 [Brassica oleracea var. oleracea]
LOC106302172	30.82	106.87	1.79392	7.25e-165	Up	4.7e-167	adenylyl-sulfate kinase 2, chloroplastic-like [Brassica oleracea var. oleracea]
LOC106331641	11.19	38.79	1.79347	1.8e-46	Up	4.7e-48	adenine phosphoribosyltransferase 1-like isoform X2 [Brassica oleracea var. oleracea]
LOC106301678	0.78	2.7	1.79141	0.000107836	Up	2.43e-05	dof zinc finger protein DOF3.4-like [Brassica oleracea var. oleracea]
LOC106313257	0.37	1.28	1.79055	7.21e-05	Up	1.58e-05	uncharacterized protein LOC106313257 [Brassica oleracea var. oleracea]
LOC106343501	0.69	2.38	1.78629	3.11e-05	Up	6.4e-06	uncharacterized protein LOC106343501 [Brassica oleracea var. oleracea]
LOC106327436	2.01	6.93	1.78566	2.41e-06	Up	4.2e-07	uncharacterized protein LOC106415218 [Brassica napus]
LOC106321737	2.41	8.3	1.78408	3.82e-06	Up	6.85e-07	alanine--tRNA ligase-like [Brassica oleracea var. oleracea]
LOC106322575	3.92	13.49	1.78296	3.6e-16	Up	2.66e-17	ABC transporter G family member 31-like [Brassica oleracea var. oleracea]
LOC106309559	2.93	10.06	1.77966	3.27e-18	Up	2.14e-19	diphosphomevalonate decarboxylase-like [Brassica oleracea var. oleracea]
LOC106305680	8.74	29.94	1.77637	1.84e-65	Up	3.27e-67	catalase-1 [Brassica oleracea var. oleracea]
LOC106306023	4.28	14.65	1.77522	8.54e-19	Up	5.39e-20	B3 domain-containing protein At5g25470-like [Brassica oleracea var. oleracea]
LOC106343370	4.14	14.16	1.77412	3.89e-28	Up	1.63e-29	LOW QUALITY PROTEIN: glucose-1-phosphate adenylyltransferase large subunit 2, chloroplastic [Brassica oleracea var. oleracea]
LOC106307185	1.98	6.77	1.77365	2.11e-13	Up	1.86e-14	putative glycosyltransferase 7 [Brassica oleracea var. oleracea]
LOC106293432	1.56	5.33	1.77259	0.000237588	Up	5.7e-05	uncharacterized protein LOC106293432 isoform X3 [Brassica oleracea var. oleracea]
LOC106320217	0.89	3.04	1.77219	7.97e-08	Up	1.16e-08	galactose oxidase-like [Brassica oleracea var. oleracea]
LOC106324877	0.83	2.83	1.76962	0.000249555	Up	6.01e-05	non-structural maintenance of chromosomes element 1 homolog [Brassica oleracea var. oleracea]
LOC106322487	0.59	2.01	1.76841	1.63e-07	Up	2.45e-08	phosphoinositide phospholipase C 4 [Brassica oleracea var. oleracea]
LOC106336249	1.23	4.19	1.76829	5.13e-08	Up	7.29e-09	protein MCM10 homolog [Brassica oleracea var. oleracea]
LOC106339685	29.38	99.98	1.7668	6.9e-85	Up	9.39e-87	uncharacterized protein LOC106339685 [Brassica oleracea var. oleracea]
LOC106300975	13.18	44.84	1.76644	1.67e-59	Up	3.32e-61	elongation of fatty acids protein 3-like [Brassica oleracea var. oleracea]
LOC106335337	4.4	14.95	1.76457	8.92e-28	Up	3.78e-29	zinc finger protein CONSTANS-LIKE 15 [Brassica oleracea var. oleracea]
LOC106296262	7.47	25.36	1.76337	8.18e-49	Up	2.05e-50	UDP-N-acetylglucosamine--N-acetylmuramyl-(pentapeptide) pyrophosphoryl-undecaprenol N-acetylglucosamine transferase [Brassica oleracea var. oleracea]
LOC106295138	6.77	22.94	1.76064	3.61e-37	Up	1.18e-38	1-aminocyclopropane-1-carboxylate oxidase homolog 1 [Brassica oleracea var. oleracea]
LOC106320470	263.17	891.28	1.75988	0	Up	0	myrosinase [Brassica oleracea var. oleracea]
LOC106328792	56	189.2	1.75641	0	Up	0	venom phosphodiesterase 2-like [Brassica oleracea var. oleracea]
LOC106296847	3.47	11.71	1.75473	4.89e-15	Up	3.86e-16	uncharacterized protein LOC106296847 isoform X2 [Brassica oleracea var. oleracea]
LOC106296958	0.83	2.8	1.75424	4.31e-07	Up	6.82e-08	DNA (cytosine-5)-methyltransferase DRM1-like isoform X1 [Brassica oleracea var. oleracea]
LOC106314606	10.49	35.27	1.74943	2.32e-88	Up	2.99e-90	D-3-phosphoglycerate dehydrogenase 1, chloroplastic [Brassica oleracea var. oleracea]
LOC106337308	0.72	2.42	1.74894	1e-06	Up	1.66e-07	vacuolar-sorting receptor 5 [Brassica oleracea var. oleracea]
LOC106330133	0.61	2.05	1.74874	0.000934193	Up	0.000251178	BTB/POZ domain-containing protein At3g05675-like [Brassica oleracea var. oleracea]
LOC106339564	0.78	2.62	1.74802	3e-05	Up	6.17e-06	mannose-1-phosphate guanyltransferase alpha [Brassica oleracea var. oleracea]
LOC106323247	2.69	9.03	1.74712	9.16e-09	Up	1.2e-09	putative H/ACA ribonucleoprotein complex subunit 1-like protein 1 [Brassica oleracea var. oleracea]
LOC106301248	10.68	35.84	1.74666	5.52e-56	Up	1.18e-57	nitrile-specifier protein 5 [Brassica oleracea var. oleracea]
LOC106293547	0.57	1.91	1.74454	0.000111541	Up	2.52e-05	4-coumarate--CoA ligase 4-like [Brassica oleracea var. oleracea]
LOC106325298	1.61	5.39	1.74323	5.33e-15	Up	4.21e-16	uncharacterized protein LOC106325298 isoform X1 [Brassica oleracea var. oleracea]
LOC106313317	0.46	1.54	1.74323	0.000900107	Up	0.000241146	NAC domain-containing protein 69-like [Brassica oleracea var. oleracea]
LOC106334914	0.61	2.04	1.74169	4.64e-05	Up	9.87e-06	protein TRANSPARENT TESTA 12-like [Brassica oleracea var. oleracea]
LOC106322815	7.71	25.77	1.74089	6.18e-23	Up	3.16e-24	CDY21854.1|//BnaC01g35940D [Brassica napus]
LOC106325168	6.87	22.94	1.73948	5.16e-25	Up	2.43e-26	inorganic pyrophosphatase 1 [Brassica oleracea var. oleracea]
LOC106296044	3.94	13.14	1.7377	1.4e-22	Up	7.27e-24	protein trichome birefringence-like 32 [Brassica oleracea var. oleracea]
LOC106313870	0.33	1.1	1.73697	0.000900205	Up	0.000241146	AP2-like ethylene-responsive transcription factor AIL6 [Brassica oleracea var. oleracea]
LOC106301463	1.15	3.82	1.73194	4.5e-10	Up	5.18e-11	hyaluronan mediated motility receptor [Brassica oleracea var. oleracea]
LOC106304360	1.89	6.27	1.73008	3.18e-08	Up	4.41e-09	uncharacterized protein LOC106304360 [Brassica oleracea var. oleracea]
LOC106327666	32.4	107.42	1.7292	5.05e-233	Up	2.26e-235	L-ascorbate oxidase-like [Brassica oleracea var. oleracea]
LOC106306696	2.34	7.75	1.72769	1.85e-07	Up	2.81e-08	60S ribosome subunit biogenesis protein NIP7 homolog [Brassica oleracea var. oleracea]
LOC106331966	6.03	19.97	1.7276	4.52e-14	Up	3.79e-15	NADH dehydrogenase [ubiquinone] 1 beta subcomplex subunit 9-like isoform X2 [Brassica oleracea var. oleracea]
LOC106343219	0.81	2.68	1.72624	5.67e-09	Up	7.25e-10	probable E3 ubiquitin ligase SUD1 [Brassica oleracea var. oleracea]
LOC106328850	2.23	7.37	1.72462	0.000249525	Up	6.01e-05	hydrophobic protein RCI2A [Brassica oleracea var. oleracea]
LOC106299768	23.67	78.18	1.72374	2.74e-182	Up	1.62e-184	9-cis-epoxycarotenoid dioxygenase NCED9, chloroplastic [Brassica oleracea var. oleracea]
LOC106303973	2.68	8.85	1.72344	1.42e-08	Up	1.9e-09	50S ribosomal protein L23-like [Brassica oleracea var. oleracea]
LOC106332597	4.05	13.35	1.72085	7.38e-08	Up	1.07e-08	uncharacterized protein LOC106332597 [Brassica oleracea var. oleracea]
LOC106327465	0.81	2.67	1.72085	5.13e-08	Up	7.29e-09	fidgetin-like protein 1 [Brassica oleracea var. oleracea]
LOC106332822	21.81	71.87	1.7204	1.89e-70	Up	3.08e-72	protein TIFY 9-like isoform X1 [Brassica oleracea var. oleracea]
LOC106316369	3.67	12.09	1.71996	1.57e-36	Up	5.22e-38	malonate--CoA ligase-like [Brassica oleracea var. oleracea]
LOC106312719	0.41	1.35	1.71926	1.24e-05	Up	2.41e-06	putative pentatricopeptide repeat-containing protein At1g19290 [Brassica oleracea var. oleracea]
LOC106328005	1.97	6.48	1.7178	3.91e-15	Up	3.07e-16	beta-(1,2)-xylosyltransferase-like [Brassica oleracea var. oleracea]
LOC106319397	1.94	6.38	1.7175	1.67e-15	Up	1.28e-16	uncharacterized protein LOC106319397 [Brassica oleracea var. oleracea]
LOC106298419	1.39	4.57	1.71711	2.87e-05	Up	5.88e-06	acyl-protein thioesterase 2-like [Brassica napus]
LOC106297022	0.94	3.09	1.71687	2.66e-07	Up	4.11e-08	probable auxin efflux carrier component 6 [Brassica oleracea var. oleracea]
LOC106331471	0.74	2.43	1.71536	8.34e-06	Up	1.57e-06	CDX80937.1|//BnaC03g01910D [Brassica napus]
LOC106340219	1.8	5.91	1.71516	1.04e-06	Up	1.72e-07	EPIDERMAL PATTERNING FACTOR-like protein 6 [Brassica oleracea var. oleracea]
LOC106319255	36.59	120.07	1.71435	2.18e-218	Up	1.03e-220	protein ASPARTIC PROTEASE IN GUARD CELL 2 [Brassica oleracea var. oleracea]
LOC106328829	10.56	34.64	1.71383	2.75e-54	Up	6.16e-56	omega-3 fatty acid desaturase, endoplasmic reticulum-like [Brassica oleracea var. oleracea]
LOC106322889	4.14	13.58	1.71378	2.95e-25	Up	1.37e-26	peptidyl-prolyl cis-trans isomerase FKBP53-like [Brassica oleracea var. oleracea]
LOC106301357	0.86	2.82	1.71329	2.89e-10	Up	3.27e-11	lon protease homolog 1, mitochondrial [Brassica oleracea var. oleracea]
LOC106302272	0.36	1.18	1.71272	0.000618073	Up	0.000160806	cyclin-A2-4-like isoform X1 [Brassica oleracea var. oleracea]
LOC106320417	2.63	8.62	1.71263	2.89e-10	Up	3.27e-11	ras-related protein RABA1c [Brassica oleracea var. oleracea]
LOC106301214	6.85	22.45	1.71254	4.54e-61	Up	8.7e-63	subtilisin-like protease SBT3.3 isoform X1
LOC106300100	125.86	412.25	1.7117	0	Up	0	kunitz-type serine protease inhibitor DrTI-like [Brassica oleracea var. oleracea]
LOC106344161	0.95	3.11	1.71091	7.98e-06	Up	1.5e-06	cingulin [Brassica oleracea var. oleracea]
LOC106332553	1.13	3.69	1.7073	9.16e-09	Up	1.2e-09	CDX90205.1|//BnaA08g17790D [Brassica napus]
LOC106308102	1.04	3.39	1.7047	2.77e-10	Up	3.13e-11	U3 small nucleolar RNA-associated protein 25 [Brassica oleracea var. oleracea]
LOC106303830	5.28	17.21	1.70464	3.25e-23	Up	1.64e-24	protein IRX15-LIKE [Brassica oleracea var. oleracea]
LOC106295893	1.76	5.73	1.70296	4.97e-14	Up	4.18e-15	DEAD-box ATP-dependent RNA helicase 9 [Brassica oleracea var. oleracea]
LOC106301223	640.89	2084.93	1.70185	0	Up	0	probable 6-phosphogluconolactonase 3 [Brassica oleracea var. oleracea]
LOC106306612	0.91	2.96	1.70166	5.41e-09	Up	6.91e-10	uncharacterized protein LOC106306612 [Brassica oleracea var. oleracea]
LOC106337301	1.55	5.04	1.70116	2.78e-10	Up	3.13e-11	F-box/LRR-repeat protein At2g43260-like isoform X1 [Brassica oleracea var. oleracea]
LOC106333006	0.64	2.08	1.70044	0.0005758	Up	0.000149051	uncharacterized protein LOC106399679 [Brassica napus]
LOC106336587	2.12	6.89	1.70044	1.43e-06	Up	2.42e-07	glycine cleavage system H protein 2, mitochondrial [Brassica rapa]
LOC106325095	0.58	1.88	1.69661	0.000175011	Up	4.1e-05	apoptosis-enhancing nuclease-like isoform X1 [Brassica oleracea var. oleracea]
LOC106304459	8.66	28.07	1.69659	1.53e-15	Up	1.17e-16	uncharacterized protein LOC106304459 [Brassica oleracea var. oleracea]
LOC106321863	0.25	0.81	1.69599	0.000103048	Up	2.32e-05	Fanconi anemia group I protein homolog [Brassica oleracea var. oleracea]
LOC106303745	3.6	11.66	1.6955	1.07e-15	Up	8.13e-17	putative rRNA methyltransferase YqxC [Brassica oleracea var. oleracea]
LOC106336569	10.15	32.82	1.6931	2.01e-40	Up	6.02e-42	expansin-A3 precursor [Brassica rapa]
LOC106342602	0.48	1.55	1.69116	0.00054598	Up	0.000140694	uncharacterized protein LOC106342602 [Brassica oleracea var. oleracea]
LOC106315949	0.48	1.55	1.69116	0.000237646	Up	5.7e-05	recQ-mediated genome instability protein 1 [Brassica oleracea var. oleracea]
LOC106310015	1.18	3.81	1.691	3.18e-08	Up	4.41e-09	cytochrome P450 77A3-like [Brassica oleracea var. oleracea]
LOC106329278	0.35	1.13	1.6909	0.000900401	Up	0.000241146	sterol 3-beta-glucosyltransferase UGT80A2-like [Brassica oleracea var. oleracea]
LOC106304017	0.35	1.13	1.6909	0.00035026	Up	8.68e-05	sucrose synthase 2 isoform X2 [Brassica oleracea var. oleracea]
LOC106294962	2.07	6.68	1.69022	3.65e-09	Up	4.56e-10	chaperone protein dnaJ 6 [Brassica oleracea var. oleracea]
LOC106310179	1.86	5.99	1.68725	9.6e-07	Up	1.59e-07	l protein EUTSA_v10006883mg [Eutrema salsugineum]
LOC106339414	0.65	2.09	1.68499	0.000370643	Up	9.22e-05	F-box protein DOR-like [Brassica oleracea var. oleracea]
LOC106301545	26.48	85.11	1.68443	7.16e-172	Up	4.52e-174	probable mannan synthase 10 [Brassica oleracea var. oleracea]
LOC106300081	1.66	5.33	1.68295	1.15e-07	Up	1.7e-08	B-box zinc finger protein 22 [Brassica oleracea var. oleracea]
LOC106304280	57.75	185.19	1.68111	6.19e-90	Up	7.83e-92	hypothetical protein (mitochondrion) [Vicia faba]
LOC106303803	2.23	7.15	1.6809	5.16e-09	Up	6.56e-10	uncharacterized protein LOC106303803 [Brassica oleracea var. oleracea]
LOC106308125	0.88	2.82	1.68012	1.84e-05	Up	3.67e-06	UDP-glycosyltransferase 75D1-like [Brassica oleracea var. oleracea]
LOC106327953	2.78	8.89	1.6771	3.49e-25	Up	1.63e-26	tetratricopeptide repeat protein 7B [Brassica oleracea var. oleracea]
LOC106342387	15.7	50.16	1.67577	7.24e-157	Up	5.03e-159	potassium channel AKT1 [Brassica oleracea var. oleracea]
LOC106306863	0.72	2.3	1.67556	2.87e-05	Up	5.88e-06	tyrosine decarboxylase 1-like [Brassica oleracea var. oleracea]
LOC106296491	3.2	10.22	1.67525	7.43e-14	Up	6.32e-15	serine/arginine-rich SC35-like splicing factor SCL33 [Brassica oleracea var. oleracea]
LOC106315664	0.83	2.65	1.67481	1.36e-06	Up	2.29e-07	glutamyl-tRNA(Gln) amidotransferase subunit A isoform X3 [Brassica oleracea var. oleracea]
LOC106322794	1.09	3.48	1.67476	9.58e-10	Up	1.14e-10	trifunctional UDP-glucose 4,6-dehydratase/UDP-4-keto-6-deoxy-D-glucose 3,5-epimerase/UDP-4-keto-L-rhamnose-reductase RHM3-like [Brassica oleracea var. oleracea]
LOC106335799	0.85	2.71	1.67276	6.25e-05	Up	1.36e-05	CDX70626.1|//BnaC03g07100D [Brassica napus]
LOC106321807	17.97	57.28	1.67244	3.96e-55	Up	8.66e-57	beta-amylase 5 [Brassica napus]
LOC106328283	0.99	3.15	1.66985	1.63e-07	Up	2.45e-08	ATPase family AAA domain-containing protein 3-like [Brassica oleracea var. oleracea]
LOC106307598	1.72	5.47	1.66913	4.48e-17	Up	3.14e-18	pumilio homolog 6, chloroplastic [Brassica oleracea var. oleracea]
LOC106314003	7.09	22.52	1.66735	5.02e-12	Up	4.9e-13	uncharacterized protein LOC103833177 [Brassica rapa]
LOC106292525	3.35	10.64	1.66726	1.12e-20	Up	6.35e-22	cytochrome P450 72A13 [Brassica oleracea var. oleracea]
LOC106343651	3.24	10.29	1.66718	3.73e-10	Up	4.27e-11	VQ motif-containing protein 19-like [Brassica oleracea var. oleracea]
LOC106293376	1.71	5.43	1.66696	4.28e-08	Up	6.04e-09	uncharacterized protein LOC106293376 [Brassica oleracea var. oleracea]
LOC106312680	1.01	3.2	1.66372	1.31e-16	Up	9.47e-18	Fanconi anemia group D2 protein homolog [Brassica oleracea var. oleracea]
LOC106342143	1.84	5.82	1.66131	2.75e-08	Up	3.78e-09	transcription factor bHLH69 [Brassica oleracea var. oleracea]
LOC106315629	2.35	7.42	1.65876	1.16e-11	Up	1.17e-12	uncharacterized protein LOC106315629 [Brassica oleracea var. oleracea]
LOC106318842	1.86	5.87	1.65806	0.000103061	Up	2.32e-05	uncharacterized protein LOC106318842 [Brassica oleracea var. oleracea]
LOC106341466	3.06	9.64	1.6555	2.18e-13	Up	1.92e-14	bifunctional epoxide hydrolase 2-like [Brassica oleracea var. oleracea]
LOC106332111	4.33	13.64	1.65541	3.13e-09	Up	3.89e-10	gibberellin-regulated protein 7-like [Brassica rapa]
LOC106327477	0.54	1.7	1.6545	2.75e-08	Up	3.78e-09	kinesin-like protein KIF11 isoform X1 [Brassica oleracea var. oleracea]
LOC106306305	4.52	14.22	1.65353	1.16e-16	Up	8.38e-18	CDY02175.1|//BnaA03g39920D [Brassica napus]
LOC106318751	2.15	6.76	1.65269	7.13e-15	Up	5.68e-16	H/ACA ribonucleoprotein complex subunit 4-like [Brassica oleracea var. oleracea]
LOC106303921	0.77	2.42	1.65208	1.65e-05	Up	3.25e-06	CDPK-related kinase 4-like [Brassica oleracea var. oleracea]
LOC106343119	2.85	8.94	1.64931	3.97e-11	Up	4.18e-12	ethylene-responsive transcription factor RAP2-10 [Brassica oleracea var. oleracea]
LOC106331403	16.99	53.28	1.64891	4.6e-68	Up	7.81e-70	annexin D4-like [Brassica oleracea var. oleracea]
LOC106342805	2.75	8.61	1.64658	4.26e-17	Up	2.98e-18	putative E3 ubiquitin-protein ligase XBAT31 [Brassica oleracea var. oleracea]
LOC106310077	4.39	13.73	1.64504	2.18e-13	Up	1.92e-14	histone H3-like centromeric protein HTR12 isoform X1 [Brassica oleracea var. oleracea]
LOC106307744	1.42	4.43	1.64142	1.54e-07	Up	2.32e-08	protein arginine N-methyltransferase 1.1 [Brassica oleracea var. oleracea]
LOC106326885	0.7	2.18	1.6389	4.67e-11	Up	4.94e-12	indole-3-acetaldehyde oxidase-like isoform X1 [Brassica oleracea var. oleracea]
LOC106324926	2.02	6.29	1.63871	4.52e-08	Up	6.38e-09	PLASMODESMATA CALLOSE-BINDING PROTEIN 4-like [Brassica oleracea var. oleracea]
LOC106292641	11.8	36.74	1.63857	6.87e-34	Up	2.44e-35	protein NUCLEAR FUSION DEFECTIVE 2-like [Brassica oleracea var. oleracea]
LOC106306633	0.37	1.15	1.63604	0.000805142	Up	0.00021373	ubiquitin carboxyl-terminal hydrolase 21-like [Brassica oleracea var. oleracea]
LOC106337451	2.87	8.92	1.63599	1.21e-14	Up	9.83e-16	CDY14808.1|//BnaC04g48050D [Brassica napus]
LOC106313153	0.68	2.11	1.63364	1.65e-05	Up	3.25e-06	uncharacterized protein LOC106313153 [Brassica oleracea var. oleracea]
LOC106321272	0.7	2.17	1.63227	1.05e-05	Up	2.02e-06	probable DNA helicase MCM9 [Brassica oleracea var. oleracea]
LOC106315825	56.26	174.2	1.63056	8e-176	Up	4.93e-178	protein TIFY 9-like isoform X1 [Brassica oleracea var. oleracea]
LOC106325206	9.14	28.29	1.63003	2.17e-21	Up	1.2e-22	blue copper protein-like [Brassica oleracea var. oleracea]
LOC106340409	1.07	3.31	1.62922	9.18e-05	Up	2.05e-05	protein MIZU-KUSSEI 1-like [Brassica oleracea var. oleracea]
LOC106298700	2.15	6.65	1.62902	6.45e-10	Up	7.53e-11	uncharacterized protein LOC106298700 isoform X3 [Brassica oleracea var. oleracea]
LOC106328115	16.16	49.98	1.62892	2.77e-76	Up	4.16e-78	lanC-like protein GCL1 [Brassica oleracea var. oleracea]
LOC106309963	2.05	6.34	1.62886	3.35e-07	Up	5.24e-08	zinc-finger homeodomain protein 7 [Brassica oleracea var. oleracea]
LOC106316015	3.36	10.39	1.62866	7.89e-14	Up	6.72e-15	nuclear transcription factor Y subunit A-10 isoform X1 [Brassica oleracea var. oleracea]
LOC106342596	0.87	2.69	1.62852	5.95e-08	Up	8.53e-09	probable leucine-rich repeat receptor-like protein kinase IMK3 [Brassica napus]
LOC106339387	0.9	2.78	1.62709	0.000512799	Up	0.00013147	uncharacterized protein LOC106339387 [Brassica oleracea var. oleracea]
LOC106330356	1.35	4.17	1.62709	2.57e-05	Up	5.23e-06	uncharacterized protein LOC106330356 [Brassica oleracea var. oleracea]
LOC106340192	1.06	3.27	1.62523	5.88e-05	Up	1.27e-05	putative 2-succinyl-6-hydroxy-2,4-cyclohexadiene-1-carboxylate synthase isoform X1 [Brassica oleracea var. oleracea]
LOC106304653	3.95	12.18	1.62459	7.66e-10	Up	9.03e-11	nuclear transcription factor Y subunit C-8 [Brassica oleracea var. oleracea]
LOC106340605	1.93	5.95	1.62429	7.18e-06	Up	1.34e-06	UDP-glucuronic acid decarboxylase 4-like [Brassica napus]
LOC106296287	4.05	12.48	1.62362	4.97e-29	Up	2.02e-30	E3 ubiquitin-protein ligase ORTHRUS 2-like [Brassica oleracea var. oleracea]
LOC106325722	0.78	2.4	1.62149	0.000575865	Up	0.000149051	pectinesterase 31-like [Brassica oleracea var. oleracea]
LOC106337939	18.51	56.95	1.62139	1.97e-37	Up	6.38e-39	nucleolin 1-like [Brassica oleracea var. oleracea]
LOC106342468	7.84	24.12	1.6213	3.8e-22	Up	2.02e-23	clathrin light chain 2-like [Brassica oleracea var. oleracea]
LOC106298736	3.27	10.06	1.62127	3.13e-10	Up	3.55e-11	ethylene-responsive transcription factor ERF013 [Brassica oleracea var. oleracea]
LOC106315288	23.97	73.68	1.62004	6.28e-87	Up	8.27e-89	LOW QUALITY PROTEIN: uncharacterized protein LOC106315288 [Brassica oleracea var. oleracea]
LOC106298074	0.82	2.52	1.61973	6.32e-08	Up	9.09e-09	uncharacterized protein LOC106298074 [Brassica oleracea var. oleracea]
LOC106300725	1.42	4.36	1.61844	8.58e-05	Up	1.91e-05	interferon regulatory factor 2-binding protein-like [Brassica oleracea var. oleracea]
LOC106295186	1.77	5.43	1.6172	8.13e-10	Up	9.61e-11	probable prolyl 4-hydroxylase 3 [Brassica oleracea var. oleracea]
LOC106292734	1.84	5.64	1.61599	1.54e-07	Up	2.32e-08	uncharacterized protein LOC106292734 [Brassica oleracea var. oleracea]
LOC106335328	2.24	6.84	1.6105	2.95e-06	Up	5.2e-07	peptide methionine sulfoxide reductase A3-like isoform X1 [Brassica oleracea var. oleracea]
LOC106312286	1.32	4.03	1.61024	2.76e-06	Up	4.85e-07	F-box protein At3g57590-like [Brassica oleracea var. oleracea]
LOC106329050	0.96	2.93	1.60979	6.74e-06	Up	1.25e-06	probable protein phosphatase 2C 42 isoform X2 [Brassica oleracea var. oleracea]
LOC106318281	35.87	109.46	1.60955	1.3e-222	Up	6.05e-225	anthranilate synthase alpha subunit 1, chloroplastic [Brassica oleracea var. oleracea]
LOC106319958	79.64	242.91	1.60886	1.02e-140	Up	8.04e-143	kunitz-type serine protease inhibitor DrTI-like [Brassica oleracea var. oleracea]
LOC106296412	0.6	1.83	1.60881	0.000328541	Up	8.1e-05	phospho-2-dehydro-3-deoxyheptonate aldolase 1, chloroplastic-like [Brassica oleracea var. oleracea]
LOC106306810	83.32	254.05	1.60838	0	Up	0	epithiospecifier protein-like [Brassica oleracea var. oleracea]
LOC106316025	2.86	8.72	1.60831	3.14e-07	Up	4.9e-08	thioredoxin-like protein HCF164, chloroplastic [Brassica oleracea var. oleracea]
LOC106307095	3.34	10.18	1.60782	2.52e-28	Up	1.05e-29	squamous cell carcinoma antigen recognized by T-cells 3 [Brassica oleracea var. oleracea]
LOC106322535	1.92	5.85	1.60733	6.56e-13	Up	5.99e-14	U-box domain-containing protein 14 [Brassica oleracea var. oleracea]
LOC106315735	6.69	20.38	1.60708	5.99e-15	Up	4.74e-16	profilin-1-like [Brassica rapa]
LOC106311898	13.63	41.49	1.60598	2.87e-91	Up	3.6e-93	D-3-phosphoglycerate dehydrogenase 2, chloroplastic [Brassica oleracea var. oleracea]
LOC106343078	4.79	14.58	1.60589	7.37e-18	Up	4.9e-19	GDSL esterase/lipase At3g14220 [Brassica oleracea var. oleracea]
LOC106292582	7.14	21.73	1.60569	9.05e-42	Up	2.64e-43	uncharacterized protein LOC106292582 [Brassica oleracea var. oleracea]
LOC106298856	1.86	5.66	1.6055	0.000805319	Up	0.00021373	sigma factor binding protein 1, chloroplastic-like [Brassica oleracea var. oleracea]
LOC106295182	0.97	2.95	1.60466	3.5e-05	Up	7.3e-06	gibberellin receptor GID1A [Brassica rapa]
LOC106323012	1.64	4.98	1.60245	4.01e-05	Up	8.42e-06	uncharacterized protein LOC106323012 isoform X2 [Brassica oleracea var. oleracea]
LOC106340151	31.72	96.3	1.60214	6.81e-67	Up	1.19e-68	cytochrome B5 isoform C [Brassica oleracea var. oleracea]
LOC106319417	0.56	1.7	1.60204	5.48e-05	Up	1.18e-05	uncharacterized protein LOC106319417 [Brassica oleracea var. oleracea]
LOC106310051	1.19	3.61	1.60104	0.000805231	Up	0.00021373	protein E6-like [Brassica oleracea var. oleracea]
LOC106327989	2.24	6.79	1.59991	7.58e-11	Up	8.18e-12	uncharacterized protein LOC106327989 [Brassica oleracea var. oleracea]
LOC106328556	2.58	7.82	1.5998	1.61e-16	Up	1.17e-17	uncharacterized protein LOC106328556 isoform X2 [Brassica oleracea var. oleracea]
LOC106339950	1.34	4.06	1.59925	4.61e-06	Up	8.34e-07	uncharacterized protein LOC106393745 [Brassica napus]
LOC106331450	2.79	8.45	1.59869	9.62e-13	Up	8.91e-14	uncharacterized protein LOC106331450 [Brassica oleracea var. oleracea]
LOC106312185	2.11	6.39	1.59857	1.28e-07	Up	1.91e-08	uncharacterized protein LOC106312185 [Brassica oleracea var. oleracea]
LOC106295175	2.51	7.6	1.59831	7.81e-27	Up	3.42e-28	auxin response factor 5-like [Brassica oleracea var. oleracea]
LOC106304101	6.8	20.58	1.59764	6.93e-14	Up	5.87e-15	UPF0587 protein C1orf123 homolog [Brassica oleracea var. oleracea]
LOC106335517	0.41	1.24	1.59664	9.18e-05	Up	2.05e-05	formin-like protein 11 [Brassica oleracea var. oleracea]
LOC106292898	1.67	5.05	1.59644	7.69e-07	Up	1.26e-07	uncharacterized protein LOC106292898 isoform X1 [Brassica oleracea var. oleracea]
LOC106325066	4.97	15.02	1.59557	1.99e-15	Up	1.54e-16	protein LURP-one-related 5 [Brassica oleracea var. oleracea]
LOC106300969	0.61	1.84	1.59282	0.000306064	Up	7.5e-05	LOW QUALITY PROTEIN: uncharacterized protein LOC106300969 [Brassica oleracea var. oleracea]
LOC106328761	40.37	121.56	1.59031	1.24e-126	Up	1.09e-128	CDX99006.1|//BnaC09g48290D [Brassica napus]
LOC106325229	27.38	82.35	1.58865	1.32e-107	Up	1.37e-109	transcription factor MYB34-like [Brassica oleracea var. oleracea]
LOC106325217	1.89	5.68	1.5875	2.22e-12	Up	2.11e-13	AP2-like ethylene-responsive transcription factor ANT [Brassica oleracea var. oleracea]
LOC106324674	2.7	8.11	1.58674	7.74e-15	Up	6.18e-16	chaperone protein DnaJ-like [Brassica oleracea var. oleracea]
LOC106313113	4.95	14.86	1.58593	2e-15	Up	1.54e-16	expansin-A5 [Brassica oleracea var. oleracea]
LOC106294536	0.48	1.44	1.58496	3.51e-05	Up	7.3e-06	uncharacterized protein At4g18490 isoform X2 [Brassica oleracea var. oleracea]
LOC106304451	2.67	8.01	1.58496	3.51e-05	Up	7.3e-06	UPF0057 membrane protein At4g30660-like [Brassica oleracea var. oleracea]
LOC106306623	6.42	19.25	1.58421	2.33e-26	Up	1.04e-27	cinnamyl alcohol dehydrogenase 5 [Brassica rapa]
LOC106312511	2.52	7.55	1.58305	1.01e-26	Up	4.42e-28	armadillo repeat-containing kinesin-like protein 1 isoform X1 [Brassica oleracea var. oleracea]
LOC106300873	10.7	32.03	1.58181	4.83e-56	Up	1.03e-57	jacalin-related lectin 42-like [Brassica oleracea var. oleracea]
LOC106310679	2.29	6.85	1.58076	0.000695221	Up	0.00018242	CDY06139.1|//BnaA09g36410D [Brassica napus]
LOC106329010	1.11	3.32	1.58062	8.11e-09	Up	1.05e-09	9-cis-epoxycarotenoid dioxygenase NCED3, chloroplastic-like [Brassica oleracea var. oleracea]
LOC106306652	1.09	3.26	1.58054	6.7e-07	Up	1.09e-07	ATP-dependent 6-phosphofructokinase 3 [Brassica oleracea var. oleracea]
LOC106327489	8.61	25.74	1.57993	1.47e-32	Up	5.42e-34	early nodulin-like protein 2 [Brassica oleracea var. oleracea]
LOC106306813	0.62	1.85	1.57719	3.51e-05	Up	7.3e-06	kinesin-like protein KIF22 isoform X2 [Brassica oleracea var. oleracea]
LOC106304796	1.18	3.52	1.57679	1.43e-05	Up	2.8e-06	methyl-CpG-binding domain protein 4-like protein [Brassica oleracea var. oleracea]
LOC106303664	1.11	3.31	1.57627	0.000306027	Up	7.5e-05	CDY47782.1|//BnaC07g41780D [Brassica napus]
LOC106302031	3.22	9.6	1.57597	5.13e-16	Up	3.82e-17	aspartic proteinase nepenthesin-2-like [Brassica oleracea var. oleracea]
LOC106322832	0.53	1.58	1.57586	0.000478583	Up	0.000121818	aspartokinase 3, chloroplastic-like [Brassica oleracea var. oleracea]
LOC106319198	0.48	1.43	1.57491	5.09e-05	Up	1.09e-05	pullulanase 1, chloroplastic isoform X1 [Brassica oleracea var. oleracea]
LOC106320705	3.29	9.8	1.57469	6.63e-25	Up	3.13e-26	DNA ligase 1 [Brassica oleracea var. oleracea]
LOC106296750	1.49	4.43	1.57199	3.75e-06	Up	6.71e-07	probable WRKY transcription factor 70 [Brassica oleracea var. oleracea]
LOC106298701	0.74	2.2	1.57191	0.000195472	Up	4.62e-05	putative U-box domain-containing protein 58 [Brassica oleracea var. oleracea]
LOC106304493	75.5	224.44	1.57178	3.92e-187	Up	2.25e-189	allene oxide cyclase 2, chloroplastic-like [Brassica oleracea var. oleracea]
LOC106324893	1.44	4.28	1.57154	7.97e-05	Up	1.76e-05	L-ascorbate peroxidase 5, peroxisomal [Brassica oleracea var. oleracea]
LOC106343870	0.66	1.96	1.57032	8.58e-05	Up	1.91e-05	nucleolin 2 isoform X6 [Brassica oleracea var. oleracea]
LOC106319061	0.94	2.79	1.56953	6.71e-06	Up	1.25e-06	uncharacterized protein LOC106319061 isoform X1 [Brassica oleracea var. oleracea]
LOC106295884	0.93	2.76	1.56937	4.01e-05	Up	8.42e-06	CDY16221.1|//BnaA09g29550D [Brassica napus]
LOC106332507	2.97	8.81	1.56868	3.75e-06	Up	6.71e-07	pathogenesis-related protein PR-4-like [Brassica oleracea var. oleracea]
LOC106296440	3.55	10.53	1.56862	3.32e-18	Up	2.17e-19	enolase 1, chloroplastic [Brassica oleracea var. oleracea]
LOC106314494	2.07	6.14	1.56861	7.97e-05	Up	1.76e-05	uncharacterized protein LOC106314494 [Brassica oleracea var. oleracea]
LOC106320063	1.7	5.04	1.56789	9.18e-10	Up	1.09e-10	uncharacterized protein LOC106428686 [Brassica napus]
LOC106318601	7	20.74	1.56699	2.94e-32	Up	1.1e-33	WD-40 repeat-containing protein MSI2 [Brassica oleracea var. oleracea]
LOC106298499	5.58	16.52	1.56588	5.1e-12	Up	4.98e-13	ubiquitin-conjugating enzyme 15 [Brassica oleracea var. oleracea]
LOC106306888	1.24	3.67	1.56544	5.85e-10	Up	6.81e-11	multiple organellar RNA editing factor 4, mitochondrial isoform X1 [Brassica oleracea var. oleracea]
LOC106329262	1.28	3.78	1.56224	2.08e-05	Up	4.17e-06	GDSL esterase/lipase 22-like [Brassica oleracea var. oleracea]
LOC106320084	1.46	4.31	1.56172	0.000750856	Up	0.000198224	C2 domain-containing protein At1g63220 [Brassica oleracea var. oleracea]
LOC106317266	2.69	7.93	1.55971	1.53e-06	Up	2.6e-07	transcription factor GTE8-like [Brassica oleracea var. oleracea]
LOC106307387	1.72	5.07	1.55958	6.29e-10	Up	7.34e-11	lysine histidine transporter-like 8 [Brassica oleracea var. oleracea]
LOC106342345	10.62	31.3	1.55938	3.66e-100	Up	4.1e-102	26S proteasome non-ATPase regulatory subunit 1 homolog A-like [Brassica napus]
LOC106331984	1.27	3.74	1.55821	0.000695143	Up	0.00018242	anaphase-promoting complex subunit 10 [Brassica oleracea var. oleracea]
LOC106297038	23.38	68.68	1.55462	4.42e-88	Up	5.71e-90	caffeic acid 3-O-methyltransferase-like [Brassica oleracea var. oleracea]
LOC106332790	5.05	14.83	1.55416	3.57e-16	Up	2.64e-17	NADH--cytochrome b5 reductase 1-like [Brassica oleracea var. oleracea]
LOC106307416	0.91	2.67	1.5529	8.5e-06	Up	1.61e-06	BTB/POZ domain-containing protein At2g24240 [Brassica oleracea var. oleracea]
LOC106328678	0.43	1.26	1.55102	0.000442684	Up	0.000112073	mechanosensitive ion channel protein 4 [Brassica oleracea var. oleracea]
LOC106306995	0.99	2.9	1.55055	0.000695375	Up	0.00018242	GATA transcription factor 7 [Brassica oleracea var. oleracea]
LOC106303827	1.38	4.04	1.54969	0.000283537	Up	6.9e-05	CDX82670.1|//BnaC07g01960D [Brassica napus]
LOC106294068	1.35	3.95	1.54889	6.7e-07	Up	1.09e-07	acyl-[acyl-carrier-protein] desaturase 5, chloroplastic [Brassica oleracea var. oleracea]
LOC106307099	22.19	64.92	1.54875	5.18e-88	Up	6.69e-90	AP2/ERF and B3 domain-containing transcription factor ARF14 [Brassica oleracea var. oleracea]
LOC106343970	0.92	2.69	1.5479	0.000283503	Up	6.9e-05	serine/threonine-protein kinase UCNL [Brassica oleracea var. oleracea]
LOC106327972	2.22	6.49	1.54766	5.85e-10	Up	6.81e-11	growth-regulating factor 2-like [Brassica oleracea var. oleracea]
LOC106300693	0.88	2.57	1.54619	0.000695066	Up	0.00018242	p21-activated protein kinase-interacting protein 1-like [Brassica oleracea var. oleracea]
LOC106300429	5.1	14.89	1.54577	1.83e-44	Up	5.02e-46	alpha-xylosidase 1-like [Brassica oleracea var. oleracea]
LOC106326829	5.97	17.43	1.54577	2.73e-13	Up	2.42e-14	MLP-like protein 31 [Brassica oleracea var. oleracea]
LOC106307265	14.54	42.36	1.54268	7.41e-124	Up	6.66e-126	beta-galactosidase 3 isoform X2 [Brassica oleracea var. oleracea]
LOC106293327	0.57	1.66	1.54215	0.000695298	Up	0.00018242	ATP-dependent DNA helicase Q-like 1 [Brassica oleracea var. oleracea]
LOC106302132	1.47	4.28	1.5418	9.03e-07	Up	1.49e-07	kelch repeat-containing protein At3g27220 [Brassica oleracea var. oleracea]
LOC106320107	1.23	3.58	1.5413	3.06e-09	Up	3.8e-10	boron transporter 1 isoform X1 [Brassica oleracea var. oleracea]
LOC106343341	0.55	1.6	1.54057	3.67e-07	Up	5.77e-08	protein TONSOKU [Brassica oleracea var. oleracea]
LOC106340459	1.64	4.77	1.54029	2.22e-06	Up	3.85e-07	ABSCISIC ACID-INSENSITIVE 5-like protein 3 isoform X1 [Brassica oleracea var. oleracea]
LOC106295965	2.39	6.95	1.54	8.05e-14	Up	6.86e-15	probable methyltransferase PMT20 isoform X1 [Brassica napus]
LOC106332320	4.21	12.24	1.53971	4.45e-09	Up	5.61e-10	uncharacterized protein LOC106332320 [Brassica oleracea var. oleracea]
LOC106293811	0.86	2.5	1.53952	0.000115367	Up	2.62e-05	cytochrome P450 87A3-like isoform X1 [Brassica oleracea var. oleracea]
LOC106322037	6.66	19.36	1.53948	3.69e-31	Up	1.4e-32	protein FAF-like, chloroplastic [Brassica oleracea var. oleracea]
LOC106341213	4.18	12.15	1.53938	1.09e-08	Up	1.44e-09	uncharacterized protein LOC106341213 [Brassica oleracea var. oleracea]
LOC106305796	4.94	14.35	1.53847	2.13e-11	Up	2.2e-12	CDX72594.1|//BnaC07g46160D [Brassica napus]
LOC106328802	0.72	2.09	1.53743	2.77e-05	Up	5.67e-06	1-deoxy-D-xylulose-5-phosphate synthase, chloroplastic-like [Brassica oleracea var. oleracea]
LOC106315380	16.5	47.89	1.53726	1.59e-41	Up	4.64e-43	prosaposin-like, partial [Brassica oleracea var. oleracea]
LOC106342406	1.63	4.73	1.53697	6.96e-09	Up	8.98e-10	mitochondrial chaperone BCS1 [Brassica oleracea var. oleracea]
LOC106292758	1.81	5.25	1.53633	3.01e-05	Up	6.19e-06	universal stress protein A-like protein [Brassica oleracea var. oleracea]
LOC106301183	3.22	9.33	1.53482	4.48e-14	Up	3.76e-15	probable RNA-binding protein ARP1 isoform X2 [Brassica oleracea var. oleracea]
LOC106328425	1.52	4.4	1.53343	8.11e-09	Up	1.05e-09	UDP-glycosyltransferase 72B1-like [Brassica oleracea var. oleracea]
LOC106322499	70.76	204.79	1.53314	7.24e-109	Up	7.48e-111	hypothetical protein CARUB_v10018191mg [Capsella rubella]
LOC106299091	3.06	8.85	1.53215	8.79e-08	Up	1.28e-08	ethylene-responsive transcription factor 4-like [Brassica oleracea var. oleracea]
LOC106301193	0.9	2.6	1.53052	1.3e-06	Up	2.2e-07	pentatricopeptide repeat-containing protein At2g16880 [Brassica oleracea var. oleracea]
LOC106300979	3.05	8.81	1.53033	2.11e-22	Up	1.11e-23	glutamine-dependent NAD(+) synthetase-like [Brassica oleracea var. oleracea]
LOC106310053	2.4	6.93	1.52982	1.1e-12	Up	1.02e-13	phosphatidate cytidylyltransferase 2 [Brassica oleracea var. oleracea]
LOC106328398	2.04	5.89	1.5297	3.83e-14	Up	3.2e-15	potassium transporter 1 [Brassica oleracea var. oleracea]
LOC106327555	31.14	89.83	1.52843	7.28e-209	Up	3.66e-211	MATE efflux family protein 5 [Brassica oleracea var. oleracea]
LOC106325714	0.52	1.5	1.52838	0.000166541	Up	3.89e-05	anaphase-promoting complex subunit 4 [Brassica oleracea var. oleracea]
LOC106306142	7.65	22.05	1.52725	2.3e-38	Up	7.3e-40	glucose-1-phosphate adenylyltransferase large subunit 3, chloroplastic isoform X1 [Brassica oleracea var. oleracea]
LOC106333140	1.6	4.61	1.52669	0.000195448	Up	4.62e-05	probable histone-arginine methyltransferase 1.3 isoform X2 [Brassica oleracea var. oleracea]
LOC106324929	31.37	90.37	1.52646	5.15e-54	Up	1.15e-55	histone H3.2-like [Brassica oleracea var. oleracea]
LOC106295102	5.47	15.75	1.52574	1.39e-15	Up	1.06e-16	transcription factor bHLH27-like isoform X3 [Brassica oleracea var. oleracea]
LOC106319996	1.4	4.03	1.52535	2.88e-11	Up	2.99e-12	plastidial pyruvate kinase 4, chloroplastic [Brassica oleracea var. oleracea]
LOC106307752	4.89	14.07	1.52472	1.79e-16	Up	1.3e-17	uncharacterized protein LOC106307752 [Brassica oleracea var. oleracea]
LOC106307704	17.84	51.31	1.52412	3.85e-58	Up	7.9e-60	NADP-dependent D-sorbitol-6-phosphate dehydrogenase-like [Brassica oleracea var. oleracea]
LOC106307956	27.51	79.12	1.52409	2.27e-95	Up	2.7e-97	probable galacturonosyltransferase-like 1 [Brassica oleracea var. oleracea]
LOC106293533	3.99	11.46	1.52215	4.86e-11	Up	5.16e-12	chaperone protein dnaJ 6-like isoform X1 [Brassica oleracea var. oleracea]
LOC106337618	1.47	4.22	1.52143	8.78e-08	Up	1.28e-08	aspartic proteinase A2 [Brassica oleracea var. oleracea]
LOC106292193	0.46	1.32	1.52083	4.33e-05	Up	9.16e-06	LOW QUALITY PROTEIN: copia protein [Brassica oleracea var. oleracea]
LOC106339869	0.98	2.81	1.51972	0.000166561	Up	3.89e-05	protein CHUP1, chloroplastic [Brassica oleracea var. oleracea]
LOC106331782	2.6	7.45	1.51873	4.35e-19	Up	2.7e-20	calcium permeable stress-gated cation channel 1 [Brassica oleracea var. oleracea]
LOC106324053	1.45	4.15	1.51706	0.000238992	Up	5.74e-05	ras-related protein RABA1d [Brassica oleracea var. oleracea]
LOC106310748	2.07	5.92	1.51597	0.000585344	Up	0.000151641	uncharacterized protein LOC106310748 [Brassica oleracea var. oleracea]
LOC106341727	1314.49	3758.15	1.51552	0	Up	0	ribulose bisphosphate carboxylase small chain F1, chloroplastic-like [Brassica oleracea var. oleracea]
LOC106304983	1.75	5	1.51457	0.000260663	Up	6.31e-05	uncharacterized protein LOC106304983 [Brassica oleracea var. oleracea]
LOC106296128	1.19	3.4	1.51457	1.38e-07	Up	2.06e-08	phosphatidylinositol/phosphatidylcholine transfer protein SFH4 isoform X2 [Brassica oleracea var. oleracea]
LOC106324596	18.39	52.52	1.51395	6.9e-47	Up	1.79e-48	desumoylating isopeptidase 1-like [Brassica oleracea var. oleracea]
LOC106300644	54.79	156.39	1.51316	0	Up	0	TSK-associating protein 1 isoform X1 [Brassica oleracea var. oleracea]
LOC106292672	1.16	3.31	1.51271	1.77e-05	Up	3.51e-06	uncharacterized protein LOC106292672 isoform X2 [Brassica oleracea var. oleracea]
LOC106342007	2.52	7.19	1.51257	4.11e-09	Up	5.16e-10	uncharacterized protein At2g39795, mitochondrial [Brassica oleracea var. oleracea]
LOC106336341	5.88	16.77	1.51199	7.87e-11	Up	8.51e-12	probable histone H2A variant 2 [Brassica oleracea var. oleracea]
LOC106327563	0.67	1.91	1.51134	5.31e-07	Up	8.51e-08	DNA mismatch repair protein MSH7 [Brassica oleracea var. oleracea]
LOC106313403	1.6	4.56	1.51096	5.92e-09	Up	7.59e-10	tetrahydrocannabinolic acid synthase-like [Brassica oleracea var. oleracea]
LOC106308300	0.53	1.51	1.51048	0.000837673	Up	0.000223368	uncharacterized protein LOC106308300 [Brassica oleracea var. oleracea]
LOC106302805	18.55	52.84	1.51021	2.3e-60	Up	4.46e-62	adenylyl-sulfate kinase 2, chloroplastic-like [Brassica oleracea var. oleracea]
LOC106331792	1.78	5.07	1.51011	7.23e-06	Up	1.35e-06	prolyl 4-hydroxylase 2 [Brassica oleracea var. oleracea]
LOC106302202	3.29	9.37	1.50996	2.52e-10	Up	2.84e-11	uncharacterized protein LOC106302202 isoform X1 [Brassica oleracea var. oleracea]
LOC106328284	1.25	3.56	1.50995	8.32e-07	Up	1.37e-07	CDY47529.1|//BnaC03g69330D [Brassica napus]
LOC106338907	2.22	6.32	1.50937	6.79e-05	Up	1.48e-05	uncharacterized protein LOC106338907 [Brassica oleracea var. oleracea]
LOC106331520	1.24	3.53	1.50933	1.92e-05	Up	3.84e-06	uncharacterized protein LOC106331520 [Brassica oleracea var. oleracea]
LOC106303826	2.97	8.45	1.50849	2.74e-10	Up	3.09e-11	probable ribose-5-phosphate isomerase 2 [Brassica oleracea var. oleracea]
LOC106311502	1.35	3.84	1.50815	1.2e-06	Up	2.01e-07	tricyclene synthase, chloroplastic-like isoform X2 [Brassica napus]
LOC106311363	82.9	235.77	1.50794	0	Up	0	inositol-3-phosphate synthase [Brassica oleracea var. oleracea]
LOC106328324	21.84	62.11	1.50785	4.36e-70	Up	7.13e-72	putative inactive flavonol synthase 2 [Brassica oleracea var. oleracea]
LOC106344782	0.96	2.73	1.50779	3.51e-05	Up	7.3e-06	protein Brevis radix-like 2 [Brassica oleracea var. oleracea]
LOC106320188	4.14	11.75	1.50496	2.24e-14	Up	1.85e-15	50S ribosomal protein L4 [Brassica oleracea var. oleracea]
LOC106342581	4.2	11.92	1.50492	1.38e-24	Up	6.63e-26	transcription factor bHLH155-like [Brassica oleracea var. oleracea]
LOC106342476	0.98	2.78	1.50423	0.000195496	Up	4.62e-05	glutamine synthetase cytosolic isozyme 1-3-like [Brassica oleracea var. oleracea]
LOC106340065	1.16	3.29	1.50396	2.77e-05	Up	5.67e-06	uncharacterized protein LOC106340065 [Brassica oleracea var. oleracea]
LOC106325649	3.9	11.06	1.50381	7.23e-06	Up	1.35e-06	copper transport protein ATX1-like [Brassica oleracea var. oleracea]
LOC106296887	23.22	65.82	1.50316	7.81e-78	Up	1.15e-79	caffeic acid 3-O-methyltransferase-like [Brassica oleracea var. oleracea]
LOC106321368	2.68	7.59	1.50187	5.1e-12	Up	4.98e-13	uncharacterized protein LOC106321368, partial [Brassica oleracea var. oleracea]
LOC106310474	1.25	3.54	1.50182	0.000900303	Up	0.000241146	5'-3' exoribonuclease 4-like [Brassica oleracea var. oleracea]
LOC106343946	4.16	11.78	1.50168	4.7e-14	Up	3.95e-15	probable galacturonosyltransferase-like 1 [Brassica oleracea var. oleracea]
LOC106302175	34.7	98.22	1.50108	5.82e-70	Up	9.56e-72	non-specific lipid transfer protein GPI-anchored 1-like [Brassica oleracea var. oleracea]
LOC106300577	1.59	4.5	1.5009	1.42e-28	Up	5.85e-30	uncharacterized protein LOC106300577 isoform X1 [Brassica oleracea var. oleracea]
LOC106300639	8.48	24	1.5009	1.36e-55	Up	2.94e-57	phenylalanine ammonia-lyase 2-like [Brassica oleracea var. oleracea]
LOC106296784	2.27	6.42	1.49988	3.38e-07	Up	5.3e-08	transcription factor MYB122-like isoform X1 [Brassica oleracea var. oleracea]
LOC106318183	3.25	9.19	1.49962	1.3e-06	Up	2.2e-07	50S ribosomal protein L10, chloroplastic-like [Brassica oleracea var. oleracea]
LOC106331813	21.83	61.68	1.49849	1.27e-31	Up	4.81e-33	histone H2B.3-like [Brassica napus]
LOC106293153	1.66	4.69	1.4984	3.26e-05	Up	6.74e-06	methylesterase 17-like [Brassica oleracea var. oleracea]
LOC106330112	2.61	7.37	1.49761	1.77e-05	Up	3.51e-06	uncharacterized protein LOC106330112 [Brassica oleracea var. oleracea]
LOC106298850	1.35	3.81	1.49683	0.000374598	Up	9.32e-05	nuclear transcription factor Y subunit A-5-like isoform X1 [Brassica oleracea var. oleracea]
LOC106333286	5.15	14.53	1.49639	4.5e-13	Up	4.07e-14	ethylene-responsive transcription factor 12-like [Brassica oleracea var. oleracea]
LOC106305922	1.23	3.47	1.49628	2.1e-08	Up	2.85e-09	uncharacterized protein LOC106305922 [Brassica oleracea var. oleracea]
LOC106331858	4.36	12.29	1.49508	1.29e-16	Up	9.31e-18	squamosa promoter-binding-like protein 13A [Brassica oleracea var. oleracea]
LOC106298532	4.66	13.12	1.49337	4.9e-13	Up	4.43e-14	thaumatin-like protein [Brassica oleracea var. oleracea]
LOC106318831	8.31	23.38	1.49236	9.83e-70	Up	1.62e-71	homeobox-leucine zipper protein REVOLUTA [Brassica oleracea var. oleracea]
LOC106331748	2.35	6.61	1.49199	1.48e-12	Up	1.38e-13	protein NRT1/ PTR FAMILY 5.6 [Brassica oleracea var. oleracea]
LOC106344008	1.48	4.16	1.49099	1.1e-06	Up	1.84e-07	probable protein phosphatase 2C 43 [Brassica oleracea var. oleracea]
LOC106312983	0.68	1.91	1.48997	0.000341523	Up	8.44e-05	sugar transport protein 7 [Brassica oleracea var. oleracea]
LOC106342426	3.32	9.32	1.48915	4.41e-17	Up	3.08e-18	(6-4)DNA photolyase [Brassica oleracea var. oleracea]
LOC106344671	1.34	3.76	1.4885	0.000374554	Up	9.32e-05	CDY07090.1|//BnaCnng01050D [Brassica napus];gi|674908857|emb|CDY24184.1|//BnaC01g37640D [Brassica napus]
LOC106332419	1.48	4.15	1.48751	3.98e-05	Up	8.35e-06	receptor-like kinase TMK2 [Brassica oleracea var. oleracea]
LOC106306137	0.66	1.85	1.48699	6.22e-05	Up	1.35e-05	transmembrane E3 ubiquitin-protein ligase 1 [Brassica oleracea var. oleracea]
LOC106292477	21.66	60.58	1.48381	2.22e-103	Up	2.41e-105	phospholipase A1-Igamma1, chloroplastic [Brassica rapa]
LOC106312804	0.97	2.71	1.48224	0.00013926	Up	3.21e-05	alanine aminotransferase 1, mitochondrial-like [Brassica oleracea var. oleracea]
LOC106320194	36.79	102.74	1.48161	2.13e-75	Up	3.24e-77	proline-rich antigen homolog isoform X2 [Brassica oleracea var. oleracea]
LOC106307872	4.69	13.09	1.4808	6.31e-19	Up	3.95e-20	fasciclin-like arabinogalactan protein 10 [Brassica oleracea var. oleracea]
LOC106326808	13.32	37.12	1.4786	3.34e-37	Up	1.09e-38	annexin D2 [Brassica oleracea var. oleracea]
LOC106306989	3.69	10.26	1.47534	3.28e-08	Up	4.57e-09	neuropeptide-like protein 31 [Brassica oleracea var. oleracea]
LOC106326229	3.21	8.92	1.47447	4.05e-17	Up	2.82e-18	protein CYPRO4 [Brassica oleracea var. oleracea]
LOC106299069	25.78	71.6	1.47371	2.76e-32	Up	1.03e-33	60S ribosomal protein L36-2 [Brassica rapa]
LOC106315722	3.9	10.83	1.47349	3.8e-18	Up	2.49e-19	transcription factor MYC1 [Brassica oleracea var. oleracea]
LOC106315162	5.66	15.71	1.47281	5.33e-17	Up	3.75e-18	peroxidase 34 [Brassica napus]
LOC106328380	4.13	11.46	1.47239	2.16e-17	Up	1.48e-18	protein NETWORKED 4B-like [Brassica oleracea var. oleracea]
LOC106311662	0.75	2.08	1.47162	6.43e-07	Up	1.04e-07	calmodulin-interacting protein 111 [Brassica oleracea var. oleracea]
LOC106321320	7.1	19.69	1.47157	6.76e-27	Up	2.96e-28	protein WALLS ARE THIN 1-like [Brassica oleracea var. oleracea]
LOC106316181	3.17	8.79	1.47138	1.08e-09	Up	1.29e-10	uncharacterized protein DDB_G0284459 [Brassica oleracea var. oleracea]
LOC106292925	23.7	65.62	1.46925	2.25e-53	Up	5.12e-55	ethylene-responsive transcription factor RAP2-3 isoform X2 [Brassica oleracea var. oleracea]
LOC106342074	1.21	3.35	1.46915	2.48e-06	Up	4.32e-07	uncharacterized protein LOC106342074 [Brassica oleracea var. oleracea]
LOC106331736	13.06	36.13	1.46804	7.18e-34	Up	2.56e-35	signal recognition particle receptor subunit beta-like [Brassica oleracea var. oleracea]
LOC106299165	2	5.53	1.46728	0.000139278	Up	3.21e-05	VQ motif-containing protein 11-like [Brassica oleracea var. oleracea]
LOC106311680	1.44	3.98	1.4667	6.07e-06	Up	1.12e-06	flavin-containing monooxygenase FMO GS-OX5 [Brassica oleracea var. oleracea]
LOC106297546	2.51	6.93	1.46517	1.04e-05	Up	1.99e-06	vacuolar protein sorting-associated protein 2 homolog 2-like [Brassica oleracea var. oleracea]
LOC106344377	7.04	19.43	1.46464	2.37e-46	Up	6.19e-48	RNA-dependent RNA polymerase 1-like [Brassica oleracea var. oleracea]
LOC106343829	1.37	3.78	1.46421	1.48e-05	Up	2.91e-06	WD repeat-containing protein 74-like isoform X2 [Brassica oleracea var. oleracea]
LOC106304254	0.99	2.73	1.4634	0.000217933	Up	5.2e-05	uncharacterized protein LOC106304254 [Brassica oleracea var. oleracea]
LOC106301142	6.01	16.57	1.46314	3.19e-26	Up	1.43e-27	alkane hydroxylase MAH1-like [Brassica oleracea var. oleracea]
LOC106298131	47.27	130.29	1.46273	8.25e-58	Up	1.7e-59	21 kDa seed protein-like [Brassica oleracea var. oleracea]
LOC106320265	10.97	30.23	1.46242	2.1e-36	Up	7e-38	protein STRICTOSIDINE SYNTHASE-LIKE 8-like [Brassica oleracea var. oleracea]
LOC106325778	0.48	1.32	1.45943	0.000533347	Up	0.000137221	uncharacterized protein LOC106325778 [Brassica oleracea var. oleracea]
LOC106312874	6.29	17.29	1.45881	1.93e-32	Up	7.16e-34	DNA ligase 1 [Brassica oleracea var. oleracea]
LOC106319571	4.89	13.43	1.45755	6.54e-29	Up	2.67e-30	DEAD-box ATP-dependent RNA helicase 46 [Brassica oleracea var. oleracea]
LOC106319296	0.63	1.73	1.45735	0.000217907	Up	5.2e-05	putative pentatricopeptide repeat-containing protein At3g16890, mitochondrial [Brassica oleracea var. oleracea]
LOC106294976	8.93	24.52	1.45723	1.55e-39	Up	4.79e-41	T-complex protein 1 subunit epsilon-like [Brassica oleracea var. oleracea]
LOC106321144	6.13	16.83	1.45708	4.07e-17	Up	2.84e-18	uncharacterized protein LOC106321144 [Brassica oleracea var. oleracea]
LOC106331917	3.43	9.41	1.45599	2.44e-09	Up	3e-10	ribosome-recycling factor [Brassica oleracea var. oleracea]
LOC106331437	8.91	24.44	1.45575	1.64e-25	Up	7.58e-27	putative glucose-6-phosphate 1-epimerase [Brassica oleracea var. oleracea]
LOC106312533	2.93	8.03	1.4545	3.71e-17	Up	2.58e-18	uncharacterized protein LOC106312533 [Brassica oleracea var. oleracea]
LOC106333589	6.22	17.04	1.45394	5.54e-06	Up	1.02e-06	uncharacterized protein LOC103873522 [Brassica rapa]
LOC106316326	3.41	9.34	1.45365	1.39e-07	Up	2.08e-08	uncharacterized protein LOC106316326 [Brassica oleracea var. oleracea]
LOC106328305	2.02	5.53	1.45292	2.53e-14	Up	2.1e-15	uncharacterized protein LOC106328305 [Brassica oleracea var. oleracea]
LOC106319055	6.85	18.73	1.45118	8.34e-32	Up	3.13e-33	CDY13990.1|//BnaC09g38360D [Brassica napus]
LOC106313747	2.82	7.71	1.45104	3.82e-13	Up	3.43e-14	EH domain-containing protein 2 isoform X2 [Brassica oleracea var. oleracea]
LOC106310131	2.65	7.23	1.448	1.3e-18	Up	8.29e-20	CDX69166.1|//BnaC01g02870D [Brassica napus]
LOC106337233	15.98	43.55	1.4464	9.41e-38	Up	3.03e-39	osmotin-like protein [Brassica napus]
LOC106341709	2.43	6.62	1.44588	9.93e-19	Up	6.3e-20	beta-galactosidase 8 [Brassica oleracea var. oleracea]
LOC106303922	2.83	7.7	1.44406	8.56e-09	Up	1.12e-09	uncharacterized protein LOC106303922 [Brassica oleracea var. oleracea]
LOC106318946	1.6	4.35	1.44294	8.19e-10	Up	9.68e-11	pentatricopeptide repeat-containing protein At5g15980, mitochondrial [Brassica oleracea var. oleracea]
LOC106335875	3.39	9.21	1.44192	4.02e-12	Up	3.89e-13	NF-kappa-B-activating protein-like [Brassica oleracea var. oleracea]
LOC106335052	3.19	8.66	1.44081	9.41e-26	Up	4.29e-27	probable LRR receptor-like serine/threonine-protein kinase RFK1 [Brassica oleracea var. oleracea]
LOC106342390	2.59	7.03	1.44057	5.15e-08	Up	7.33e-09	probable adenylate kinase 6, chloroplastic [Brassica oleracea var. oleracea]
LOC106301097	4.82	13.08	1.44026	3.57e-16	Up	2.64e-17	24-methylenesterol C-methyltransferase 3 [Brassica oleracea var. oleracea]
LOC106326775	9.15	24.81	1.43908	2.62e-20	Up	1.52e-21	putative methyltransferase DDB_G0268948 [Brassica oleracea var. oleracea]
LOC106329064	1.28	3.47	1.43879	1.23e-05	Up	2.38e-06	NAC domain-containing protein 100-like [Brassica oleracea var. oleracea]
LOC106306185	2	5.42	1.43829	1.58e-24	Up	7.56e-26	uncharacterized protein LOC106306185 [Brassica oleracea var. oleracea]
LOC106339571	3.43	9.29	1.43747	5.66e-08	Up	8.09e-09	thiocyanate methyltransferase 1 isoform X1 [Brassica napus]
LOC106312090	7.08	19.17	1.43703	5.99e-39	Up	1.88e-40	auxin response factor 18 [Brassica oleracea var. oleracea]
LOC106319166	35.46	95.97	1.43639	5.14e-122	Up	4.69e-124	formate dehydrogenase, mitochondrial [Brassica oleracea var. oleracea]
LOC106312821	3.5	9.47	1.43601	1.12e-12	Up	1.04e-13	serine/threonine-protein kinase SRK2A-like [Brassica oleracea var. oleracea]
LOC106321340	12.44	33.64	1.43519	2.48e-40	Up	7.45e-42	UDP-arabinopyranose mutase 2 [Brassica oleracea var. oleracea]
LOC106339955	2.67	7.22	1.43516	0.000341482	Up	8.44e-05	sigma factor binding protein 1, chloroplastic-like [Brassica oleracea var. oleracea]
LOC106339358	1.21	3.27	1.43428	0.000310164	Up	7.62e-05	CASP-like protein 4A3 [Brassica oleracea var. oleracea]
LOC106319047	3.32	8.97	1.43392	2.91e-23	Up	1.47e-24	squamosa promoter-binding-like protein 7 isoform X1 [Brassica oleracea var. oleracea]
LOC106292483	49.15	132.74	1.43334	3.95e-112	Up	3.99e-114	histone H1.1-like [Brassica napus]
LOC106336520	5.34	14.42	1.43316	6.13e-21	Up	3.45e-22	uncharacterized protein LOC106336520 isoform X2 [Brassica oleracea var. oleracea]
LOC106324878	1.3	3.51	1.43296	0.000485113	Up	0.000123664	uncharacterized protein LOC106324878 [Brassica oleracea var. oleracea]
LOC106341830	1.33	3.59	1.43256	1.23e-05	Up	2.38e-06	LOW QUALITY PROTEIN: uncharacterized protein At4g15970-like [Brassica oleracea var. oleracea]
LOC106295437	30.56	82.45	1.43188	1.32e-93	Up	1.61e-95	annexin D1 [Brassica oleracea var. oleracea]
LOC106307742	1.22	3.29	1.43121	0.000761018	Up	0.000201084	uncharacterized protein LOC106307742 [Brassica oleracea var. oleracea]
LOC106343208	0.89	2.4	1.43116	0.000761102	Up	0.000201084	protein ROOT INITIATION DEFECTIVE 3-like [Brassica oleracea var. oleracea]
LOC106307365	0.69	1.86	1.43063	8.1e-05	Up	1.79e-05	LETM1 and EF-hand domain-containing protein 1, mitochondrial [Brassica oleracea var. oleracea]
LOC106315529	4.53	12.2	1.4293	2.02e-11	Up	2.08e-12	reticulon-like protein B3 [Brassica oleracea var. oleracea]
LOC106336441	6.06	16.32	1.42925	9.04e-28	Up	3.84e-29	uncharacterized protein LOC106336441 [Brassica oleracea var. oleracea]
LOC106293477	2.28	6.14	1.42921	2.93e-06	Up	5.16e-07	replication protein A 32 kDa subunit B [Brassica oleracea var. oleracea]
LOC106327213	3.55	9.56	1.42919	8.08e-08	Up	1.17e-08	50S ribosomal protein L9, chloroplastic-like [Brassica rapa]
LOC106296593	5.83	15.65	1.4246	3.17e-17	Up	2.2e-18	thiosulfate/3-mercaptopyruvate sulfurtransferase 1, mitochondrial isoform X1 [Brassica oleracea var. oleracea]
LOC106313566	3.41	9.15	1.424	4.32e-10	Up	4.97e-11	uncharacterized protein LOC106313566 [Brassica oleracea var. oleracea]
LOC106343199	8.47	22.72	1.42353	4.49e-23	Up	2.28e-24	kinase-interacting family protein-like isoform X2 [Brassica napus]
LOC106304082	4.8	12.87	1.42291	4.3e-16	Up	3.19e-17	CRAL-TRIO domain-containing protein C23B6.04c-like [Brassica oleracea var. oleracea]
LOC106304298	10.98	29.44	1.4229	1.35e-17	Up	9.07e-19	uncharacterized protein LOC106304298 [Brassica oleracea var. oleracea]
LOC106306936	5.03	13.48	1.42219	1.01e-26	Up	4.44e-28	uncharacterized protein LOC106306936 isoform X1 [Brassica oleracea var. oleracea]
LOC106311982	1.53	4.1	1.42209	1.92e-08	Up	2.59e-09	DEAD-box ATP-dependent RNA helicase 52-like [Brassica oleracea var. oleracea]
LOC106313147	9.97	26.71	1.42172	3.31e-17	Up	2.29e-18	ubiquitin-conjugating enzyme E2 28-like [Brassica napus]
LOC106327626	1.21	3.24	1.42099	1.66e-09	Up	2.02e-10	lon protease homolog 1, mitochondrial [Brassica oleracea var. oleracea]
LOC106295366	2.38	6.37	1.42033	7.81e-09	Up	1.01e-09	cyclin-A1-1 [Brassica oleracea var. oleracea]
LOC106307859	0.83	2.22	1.41938	0.000281715	Up	6.85e-05	xyloglucan galactosyltransferase KATAMARI1 [Brassica oleracea var. oleracea]
LOC106329153	172.36	460.97	1.41925	2.98e-243	Up	1.22e-245	non-specific lipid-transfer protein 3-like [Brassica oleracea var. oleracea]
LOC106306943	4.36	11.66	1.41917	1.15e-18	Up	7.33e-20	probable polygalacturonase [Brassica oleracea var. oleracea]
LOC106337115	3.56	9.52	1.41908	8.1e-19	Up	5.1e-20	ATPase family AAA domain-containing protein 3 [Brassica oleracea var. oleracea]
LOC106312870	0.92	2.46	1.41895	3.24e-12	Up	3.11e-13	uncharacterized protein LOC106312870 [Brassica oleracea var. oleracea]
LOC106327092	10.25	27.38	1.4175	7.69e-75	Up	1.18e-76	non-lysosomal glucosylceramidase [Brassica oleracea var. oleracea]
LOC106321362	1.03	2.75	1.41679	0.000114992	Up	2.61e-05	hypothetical protein AALP_AA2G120600 [Arabis alpina]
LOC106311693	12.43	33.17	1.41605	1.72e-19	Up	1.04e-20	CDX73471.1|//BnaC08g25320D [Brassica napus]
LOC106335172	0.57	1.52	1.41504	0.000118512	Up	2.7e-05	villin-5-like [Brassica oleracea var. oleracea]
LOC106329324	1.14	3.04	1.41504	1.75e-05	Up	3.46e-06	malonyl-CoA decarboxylase, mitochondrial [Brassica oleracea var. oleracea]
LOC106335026	2.28	6.08	1.41504	0.000761186	Up	0.000201084	uncharacterized protein LOC106384156 [Brassica napus]
LOC106322076	5.37	14.32	1.41504	4.58e-06	Up	8.3e-07	factor of DNA methylation 1-like [Brassica napus]
LOC106337701	0.8	2.13	1.41278	6.66e-05	Up	1.45e-05	vacuolar-sorting receptor 1-like [Brassica oleracea var. oleracea]
LOC106328610	76.5	203.43	1.411	1.96e-187	Up	1.12e-189	uncharacterized protein LOC106328610 [Brassica oleracea var. oleracea]
LOC106312703	1.28	3.4	1.40939	3.39e-06	Up	6.03e-07	protein phosphatase 2C 7-like [Brassica oleracea var. oleracea]
LOC106303994	11.56	30.68	1.40816	2.21e-19	Up	1.35e-20	high mobility group B protein 4-like [Brassica oleracea var. oleracea]
LOC106318077	3	7.96	1.40781	8.98e-20	Up	5.36e-21	probable glucan 1,3-alpha-glucosidase [Brassica oleracea var. oleracea]
LOC106296164	0.75	1.99	1.40781	9.46e-08	Up	1.38e-08	uncharacterized protein LOC106296164 [Brassica oleracea var. oleracea]
LOC106311932	3.23	8.57	1.40776	5.13e-35	Up	1.77e-36	DNA (cytosine-5)-methyltransferase 1-like [Brassica oleracea var. oleracea]
LOC106319871	3.48	9.23	1.40724	8.8e-12	Up	8.74e-13	CDY25238.1|//BnaC02g30140D [Brassica napus]
LOC106324804	2.98	7.9	1.40654	3.24e-12	Up	3.11e-13	probable DNA primase large subunit [Brassica oleracea var. oleracea]
LOC106318421	6.32	16.75	1.40617	6.03e-08	Up	8.65e-09	unknwn protein
LOC106324900	4.89	12.96	1.40616	8.72e-10	Up	1.03e-10	uncharacterized protein LOC106421312 [Brassica napus]
LOC106304055	1.6	4.24	1.40599	0.000688115	Up	0.000180355	ankyrin repeat and SAM domain-containing protein 6 [Brassica oleracea var. oleracea]
LOC106313299	4.88	12.93	1.40577	4.04e-24	Up	1.97e-25	uncharacterized protein LOC106313299 [Brassica oleracea var. oleracea]
LOC106301448	27.53	72.91	1.40511	1.3e-31	Up	4.92e-33	CDX92861.1|//BnaC07g41190D [Brassica napus]
LOC106304130	1.59	4.21	1.40479	0.000162729	Up	3.79e-05	beta carbonic anhydrase 5, chloroplastic-like [Brassica oleracea var. oleracea]
LOC106318634	23.99	63.52	1.40478	1.82e-34	Up	6.38e-36	uncharacterized protein LOC106318634 [Brassica oleracea var. oleracea]
LOC106343126	7.72	20.44	1.40472	8.72e-10	Up	1.03e-10	gibberellin-regulated protein 9 [Brassica oleracea var. oleracea]
LOC106322909	1.22	3.23	1.40465	0.000139242	Up	3.21e-05	alpha/beta hydrolase domain-containing protein 11-like [Brassica oleracea var. oleracea]
LOC106343961	2.72	7.2	1.40439	1.53e-06	Up	2.61e-07	ganglioside-induced differentiation-associated protein 2 [Brassica oleracea var. oleracea]
LOC106301630	2.97	7.86	1.40407	1.58e-09	Up	1.92e-10	transcription factor MYB28-like [Brassica oleracea var. oleracea]
LOC106307290	135.34	358.13	1.40389	1.12e-210	Up	5.53e-213	uncharacterized protein LOC106382341 [Brassica napus]
LOC106321569	8.75	23.15	1.40366	2.88e-43	Up	8.07e-45	DNA-directed RNA polymerase II subunit 4-like [Brassica oleracea var. oleracea]
LOC106298628	1.97	5.21	1.40309	1.58e-05	Up	3.11e-06	uncharacterized protein LOC106298628 [Brassica oleracea var. oleracea]
LOC106296251	2.79	7.37	1.4014	2.06e-06	Up	3.56e-07	elongation of fatty acids protein 3-like [Brassica oleracea var. oleracea]
LOC106335297	6.1	16.1	1.40018	3.3e-32	Up	1.24e-33	heat shock 70 kDa protein 9, mitochondrial [Brassica oleracea var. oleracea]
LOC106331678	1.05	2.77	1.3995	0.000162749	Up	3.79e-05	uncharacterized protein LOC106331678 [Brassica oleracea var. oleracea]
LOC106307334	20.7	54.6	1.39927	1.7e-83	Up	2.36e-85	uncharacterized protein LOC106307334 isoform X1 [Brassica oleracea var. oleracea]
LOC106305350	6.66	17.55	1.39788	5.91e-22	Up	3.17e-23	cytochrome P450 81D1-like [Brassica oleracea var. oleracea]
LOC106307564	5.37	14.15	1.39781	1.83e-17	Up	1.25e-18	nucleosome assembly protein 1;2-like [Brassica oleracea var. oleracea]
LOC106312650	4.32	11.38	1.3974	5.28e-09	Up	6.71e-10	chromatin assembly factor 1 subunit A-like [Brassica oleracea var. oleracea]
LOC106316033	9.48	24.96	1.39666	2.63e-29	Up	1.06e-30	mediator-associated protein 1-like [Brassica oleracea var. oleracea]
LOC106313260	19.26	50.66	1.39524	1.26e-25	Up	5.76e-27	histone H3-like centromeric protein CSE4 [Vigna radiata var. radiata]
LOC106334440	10.49	27.59	1.39513	2.58e-30	Up	1.01e-31	UDP-arabinopyranose mutase 2 [Brassica oleracea var. oleracea]
LOC106294993	10.18	26.77	1.39488	1.27e-75	Up	1.93e-77	auxin response factor 6 isoform X1 [Brassica oleracea var. oleracea]
LOC106331614	56.02	147.16	1.39337	7.89e-59	Up	1.59e-60	histone H2B.3-like [Brassica napus]
LOC106342453	0.75	1.97	1.39323	3.85e-05	Up	8.07e-06	LOW QUALITY PROTEIN: ATP-dependent RNA helicase SUV3L, mitochondrial [Brassica oleracea var. oleracea]
LOC106343616	1.87	4.91	1.39268	4.77e-09	Up	6.04e-10	uncharacterized protein LOC106343616 [Brassica oleracea var. oleracea]
LOC106322524	55.85	146.63	1.39255	5.98e-114	Up	5.95e-116	CDY04866.1|//BnaAnng00480D [Brassica napus]
LOC106322944	4.27	11.2	1.39119	2.02e-08	Up	2.74e-09	uncharacterized protein LOC106322944 [Brassica oleracea var. oleracea]
LOC106343612	45.93	120.36	1.38985	1.02e-155	Up	7.2e-158	LOW QUALITY PROTEIN: arogenate dehydratase/prephenate dehydratase 1, chloroplastic [Brassica oleracea var. oleracea]
LOC106293779	6.77	17.74	1.38978	1.53e-28	Up	6.35e-30	L-ascorbate oxidase homolog [Brassica oleracea var. oleracea]
LOC106294305	7.53	19.73	1.38967	1.99e-20	Up	1.15e-21	nitrile-specifier protein 5 [Brassica oleracea var. oleracea]
LOC106337175	1.15	3.01	1.38813	9.4e-05	Up	2.1e-05	protein kinase PINOID 2 [Brassica oleracea var. oleracea]
LOC106312572	3.98	10.4	1.38574	8.16e-19	Up	5.14e-20	transcription factor MYC4 [Brassica oleracea var. oleracea]
LOC106344006	5.65	14.76	1.38537	2.57e-19	Up	1.58e-20	uncharacterized protein LOC106344006 isoform X1 [Brassica oleracea var. oleracea]
LOC106328916	2.47	6.45	1.38479	2.05e-10	Up	2.29e-11	auxin transporter-like protein 2 [Brassica oleracea var. oleracea]
LOC106339525	10.13	26.45	1.38463	1.28e-18	Up	8.15e-20	protein YLS3-like [Brassica oleracea var. oleracea]
LOC106321626	5.59	14.59	1.38406	1.83e-08	Up	2.46e-09	uncharacterized protein LOC106321626 [Brassica oleracea var. oleracea]
LOC106308190	5.02	13.1	1.38381	2.01e-18	Up	1.29e-19	endonuclease 1 [Brassica oleracea var. oleracea]
LOC106296992	1.8	4.69	1.38159	2.47e-08	Up	3.38e-09	embryogenesis-associated protein EMB8 isoform X1 [Brassica oleracea var. oleracea]
LOC106328226	168.77	439.3	1.38015	0	Up	0	glutathione S-transferase F9 [Brassica rapa]
LOC106310132	9.79	25.48	1.37999	7.15e-13	Up	6.54e-14	DNA-directed RNA polymerases II, IV and V subunit 9B-like [Brassica rapa]
LOC106343486	8.05	20.94	1.3792	3.23e-31	Up	1.23e-32	4-coumarate--CoA ligase 4-like [Brassica oleracea var. oleracea]
LOC106312370	1.25	3.25	1.37851	0.000131978	Up	3.03e-05	putative box C/D snoRNA protein SPCC613.07 [Brassica oleracea var. oleracea]
LOC106294971	2.8	7.28	1.37851	1.05e-08	Up	1.38e-09	protein STRICTOSIDINE SYNTHASE-LIKE 3 [Brassica oleracea var. oleracea]
LOC106341884	15.12	39.31	1.37844	2.27e-74	Up	3.51e-76	uncharacterized protein LOC106341884 [Brassica oleracea var. oleracea]
LOC106298766	7.96	20.69	1.37809	1.85e-22	Up	9.66e-24	probable inactive serine/threonine-protein kinase fnkC [Brassica oleracea var. oleracea]
LOC106306456	12.15	31.52	1.37531	1.85e-45	Up	4.95e-47	S-alkyl-thiohydroximate lyase SUR1-like isoform X1 [Brassica oleracea var. oleracea]
LOC106320432	39.8	103.21	1.37474	1.84e-152	Up	1.33e-154	LOW QUALITY PROTEIN: (E,E)-geranyllinalool synthase-like [Brassica oleracea var. oleracea]
LOC106320000	2.8	7.26	1.37454	5.42e-05	Up	1.17e-05	probable disease resistance protein At1g12280 [Brassica oleracea var. oleracea]
LOC106343497	4.13	10.69	1.37205	8.65e-16	Up	6.51e-17	uncharacterized protein LOC106343497 [Brassica oleracea var. oleracea]
LOC106342565	6.79	17.57	1.37163	1.8e-16	Up	1.31e-17	probable 2-oxoacid dependent dioxygenase [Brassica oleracea var. oleracea]
LOC106343442	3.06	7.91	1.37015	4.46e-16	Up	3.31e-17	uncharacterized protein LOC106343442 isoform X4 [Brassica oleracea var. oleracea]
LOC106310167	4.26	11.01	1.36989	3.71e-10	Up	4.24e-11	inorganic pyrophosphatase 2-like [Brassica oleracea var. oleracea]
LOC106307062	0.96	2.48	1.36923	5.24e-07	Up	8.4e-08	probable sucrose-phosphate synthase 2 [Brassica oleracea var. oleracea]
LOC106312833	4.11	10.61	1.36821	7.01e-16	Up	5.26e-17	glucan endo-1,3-beta-glucosidase 8 [Brassica oleracea var. oleracea]
LOC106337373	9.05	23.35	1.36743	8.6e-18	Up	5.75e-19	selenoprotein H isoform X2 [Brassica oleracea var. oleracea]
LOC106341969	1	2.58	1.36737	3.75e-06	Up	6.72e-07	LETM1 and EF-hand domain-containing protein 1, mitochondrial-like [Brassica oleracea var. oleracea]
LOC106327567	14.28	36.84	1.36728	5.57e-60	Up	1.09e-61	3-hydroxy-3-methylglutaryl-coenzyme A reductase 1 isoform X2 [Brassica oleracea var. oleracea]
LOC106327111	2.67	6.88	1.36557	3.68e-28	Up	1.54e-29	TMV resistance protein N-like isoform X1 [Brassica oleracea var. oleracea]
LOC106321208	1.25	3.22	1.36513	4.93e-08	Up	7e-09	transducin beta-like protein 3 [Brassica oleracea var. oleracea]
LOC106300751	2.9	7.47	1.36505	1.36e-13	Up	1.18e-14	CDX79395.1|//BnaC06g19080D [Brassica napus]
LOC106315721	1.39	3.58	1.36488	0.000438952	Up	0.000111051	CDY17345.1|//BnaA10g09790D [Brassica napus]
LOC106315569	4.95	12.74	1.36387	2.56e-16	Up	1.87e-17	ribosome biogenesis protein WDR12 homolog [Brassica oleracea var. oleracea]
LOC106312678	8.58	22.08	1.36369	2.65e-24	Up	1.28e-25	fructose-bisphosphate aldolase, cytoplasmic isozyme-like [Brassica oleracea var. oleracea]
LOC106302177	5.72	14.72	1.36369	1.28e-09	Up	1.54e-10	uncharacterized protein LOC106302177 [Brassica oleracea var. oleracea]
LOC106329116	4.19	10.78	1.36333	4.6e-20	Up	2.71e-21	DNA replication licensing factor MCM7 [Brassica oleracea var. oleracea]
LOC106307853	1.1	2.83	1.3633	0.000500295	Up	0.000127856	E3 ubiquitin-protein ligase SINAT2 [Brassica oleracea var. oleracea]
LOC106302231	0.84	2.16	1.36257	4.88e-05	Up	1.04e-05	exonuclease 1 [Brassica oleracea var. oleracea]
LOC106336644	0.77	1.98	1.36257	0.000357721	Up	8.88e-05	putative pentatricopeptide repeat-containing protein At5g40405 [Brassica oleracea var. oleracea]
LOC106345063	4.86	12.49	1.36174	8.53e-09	Up	1.11e-09	uncharacterized protein At5g19025 [Brassica oleracea var. oleracea]
LOC106292531	13.47	34.61	1.36144	7.38e-22	Up	3.98e-23	reactive Intermediate Deaminase A, chloroplastic-like, partial [Brassica oleracea var. oleracea]
LOC106320499	4.04	10.38	1.36138	0.000106559	Up	2.4e-05	NADH-cytochrome b5 reductase 2-like isoform X2 [Brassica oleracea var. oleracea]
LOC106325108	1.53	3.93	1.361	3.13e-05	Up	6.46e-06	mevalonate kinase-like [Brassica oleracea var. oleracea]
LOC106337504	0.95	2.44	1.36088	7.61e-05	Up	1.68e-05	CDX95315.1|//BnaC04g28430D [Brassica napus]
LOC106328218	42.17	108.29	1.36061	1.83e-84	Up	2.51e-86	unknwn protein
LOC106318010	4	10.27	1.36036	5.97e-17	Up	4.21e-18	probable pectinesterase/pectinesterase inhibitor 61 [Brassica oleracea var. oleracea]
LOC106300479	22.46	57.63	1.35946	8.32e-24	Up	4.12e-25	uncharacterized protein LOC106300479 [Brassica oleracea var. oleracea]
LOC106322940	3.31	8.49	1.35893	7.05e-14	Up	5.97e-15	CBS domain-containing protein CBSCBSPB1-like [Brassica oleracea var. oleracea]
LOC106324787	1.93	4.95	1.35883	7.2e-07	Up	1.18e-07	transaldolase-like [Brassica oleracea var. oleracea]
LOC106313567	19.77	50.65	1.35725	1.36e-47	Up	3.46e-49	adenylyl-sulfate kinase 1, chloroplastic [Brassica oleracea var. oleracea]
LOC106324812	50.36	128.98	1.3568	5.26e-66	Up	9.27e-68	probable histone H2A.7 [Brassica oleracea var. oleracea]
LOC106326105	10.69	27.35	1.35528	3.81e-10	Up	4.36e-11	uncharacterized protein LOC106326105 [Brassica oleracea var. oleracea]
LOC106318641	14.73	37.68	1.35504	4.22e-68	Up	7.15e-70	squalene monooxygenase 1,1 [Brassica oleracea var. oleracea]
LOC106340421	2.19	5.6	1.3545	0.000871258	Up	0.000233112	small ubiquitin-related modifier 5-like [Brassica oleracea var. oleracea]
LOC106322919	45.44	116.18	1.35433	1.67e-99	Up	1.88e-101	mitogen-activated protein kinase kinase 9 [Brassica oleracea var. oleracea]
LOC106321252	9.08	23.21	1.35398	5.84e-18	Up	3.87e-19	uncharacterized protein LOC106321252 [Brassica oleracea var. oleracea]
LOC106310441	6.37	16.28	1.35373	1.47e-21	Up	8.05e-23	5'-adenylylsulfate reductase 3, chloroplastic [Brassica oleracea var. oleracea]
LOC106328919	1.8	4.6	1.35364	4.15e-07	Up	6.57e-08	U3 snoRNP-associated protein-like YAO [Brassica oleracea var. oleracea]
LOC106306615	9.45	24.13	1.35244	9.35e-17	Up	6.68e-18	cold-regulated 413 plasma membrane protein 1-like [Brassica oleracea var. oleracea]
LOC106339899	2.63	6.71	1.35125	1.48e-08	Up	1.98e-09	protein JASON-like isoform X1 [Brassica oleracea var. oleracea]
LOC106313138	2.07	5.28	1.35091	1.43e-12	Up	1.33e-13	CDY60937.1|//BnaC09g52490D [Brassica napus]
LOC106318616	2.53	6.45	1.35016	1.23e-18	Up	7.81e-20	uncharacterized protein LOC106318616 [Brassica oleracea var. oleracea]
LOC106316489	1.46	3.72	1.34933	2.82e-05	Up	5.77e-06	CDY26827.1|//BnaC09g09540D [Brassica napus]
LOC106292554	10.03	25.54	1.34844	1.95e-30	Up	7.6e-32	phospholipase A(1) LCAT3 [Brassica oleracea var. oleracea]
LOC106331942	8.49	21.61	1.34786	6.93e-12	Up	6.83e-13	ATP-dependent RNA helicase A-like [Brassica rapa]
LOC106331716	2.04	5.19	1.34716	5.29e-06	Up	9.68e-07	RING-H2 finger protein ATL51-like [Brassica oleracea var. oleracea]
LOC106303947	9.03	22.97	1.34695	9.57e-22	Up	5.19e-23	cyclin-dependent kinase B2-2 [Brassica rapa]
LOC106332510	2.84	7.22	1.34611	3.94e-05	Up	8.25e-06	probable small nuclear ribonucleoprotein Sm D1 [Brassica oleracea var. oleracea]
LOC106322511	9.65	24.53	1.34595	4.43e-12	Up	4.3e-13	subtilisin-like protease SBT3.3 [Brassica oleracea var. oleracea]
LOC106321246	3.64	9.25	1.34552	4.36e-15	Up	3.42e-16	uncharacterized protein LOC106321246 [Brassica oleracea var. oleracea]
LOC106313463	0.89	2.26	1.34445	0.000781688	Up	0.000207002	pentatricopeptide repeat-containing protein At2g17670 [Brassica oleracea var. oleracea]
LOC106336528	5.73	14.55	1.34441	9.58e-22	Up	5.19e-23	probable protein phosphatase 2C 64 [Brassica oleracea var. oleracea]
LOC106321640	8.03	20.39	1.34439	8.42e-22	Up	4.56e-23	expansin-A15-like [Brassica oleracea var. oleracea]
LOC106308292	1.64	4.16	1.34289	6.69e-06	Up	1.24e-06	growth-regulating factor 4 [Brassica oleracea var. oleracea]
LOC106343966	41.4	105.01	1.34282	9.49e-95	Up	1.15e-96	polygalacturonase inhibitor 1-like [Brassica oleracea var. oleracea]
LOC106296613	1.44	3.65	1.34183	0.000146715	Up	3.39e-05	transcription factor bHLH96-like [Brassica oleracea var. oleracea]
LOC106332153	16.19	41.02	1.34122	8.62e-26	Up	3.93e-27	CDY00985.1|//BnaC05g42150D [Brassica napus]
LOC106343301	1.54	3.9	1.34054	2.22e-06	Up	3.85e-07	probable galacturonosyltransferase 11 [Brassica oleracea var. oleracea]
LOC106307504	23.76	60.17	1.34051	8.66e-28	Up	3.66e-29	BAS89180.1|//Os04g0419600 [Oryza sativa Japonica Group]
LOC106339312	0.62	1.57	1.34042	7.62e-05	Up	1.68e-05	B3 domain-containing transcription repressor VAL1-like [Brassica oleracea var. oleracea]
LOC106329190	4.06	10.28	1.34029	3.43e-10	Up	3.9e-11	expansin-A4 [Brassica oleracea var. oleracea]
LOC106327685	55.66	140.91	1.34006	5.19e-78	Up	7.58e-80	uncharacterized GPI-anchored protein At3g06035-like [Brassica oleracea var. oleracea]
LOC106319497	0.98	2.48	1.33949	1.16e-05	Up	2.23e-06	probable galacturonosyltransferase 14 isoform X1 [Brassica oleracea var. oleracea]
LOC106319267	1.68	4.25	1.339	1.31e-09	Up	1.57e-10	pentatricopeptide repeat-containing protein At5g12100, mitochondrial [Brassica oleracea var. oleracea]
LOC106310493	6.57	16.62	1.33895	4.54e-40	Up	1.37e-41	biorientation of chromosomes in cell division protein 1-like 1 isoform X1 [Brassica oleracea var. oleracea]
LOC106292845	2.06	5.21	1.33864	2.53e-05	Up	5.14e-06	auxin-responsive protein IAA12 [Brassica oleracea var. oleracea]
LOC106298798	1.72	4.35	1.33861	2.39e-07	Up	3.68e-08	probable U3 small nucleolar RNA-associated protein 7 [Brassica oleracea var. oleracea]
LOC106328865	1.4	3.54	1.33832	4.77e-06	Up	8.67e-07	zinc finger CCCH domain-containing protein 58-like [Brassica oleracea var. oleracea]
LOC106294837	1.76	4.45	1.33823	0.000341442	Up	8.44e-05	auxin-responsive protein IAA29 isoform X2 [Brassica oleracea var. oleracea]
LOC106307793	17.39	43.96	1.33793	2.4e-43	Up	6.7e-45	mediator of RNA polymerase II transcription subunit 36a isoform X2 [Brassica napus]
LOC106292560	26.5	66.96	1.33731	1.94e-50	Up	4.66e-52	thaumatin-like protein [Brassica oleracea var. oleracea]
LOC106301197	0.76	1.92	1.33703	2.22e-06	Up	3.85e-07	DNA mismatch repair protein MLH3 isoform X2 [Brassica oleracea var. oleracea]
LOC106300635	1.6	4.04	1.33628	1.76e-10	Up	1.96e-11	pentatricopeptide repeat-containing protein At1g71210 [Brassica oleracea var. oleracea]
LOC106320944	4.84	12.22	1.33617	9.11e-16	Up	6.87e-17	uncharacterized protein LOC106320944 isoform X1 [Brassica oleracea var. oleracea]
LOC106308139	1.74	4.39	1.33513	1.81e-05	Up	3.6e-06	uncharacterized protein LOC106308139 isoform X1 [Brassica oleracea var. oleracea]
LOC106295719	2.95	7.44	1.33459	6.01e-06	Up	1.11e-06	thymidine kinase-like [Brassica oleracea var. oleracea]
LOC106301874	0.71	1.79	1.33407	0.000447627	Up	0.000113468	ankyrin repeat domain-containing protein 13C [Brassica oleracea var. oleracea]
LOC106306196	0.96	2.42	1.3339	1.45e-05	Up	2.85e-06	probable LRR receptor-like serine/threonine-protein kinase At2g02780 [Brassica oleracea var. oleracea]
LOC106301729	5.78	14.57	1.33386	2.82e-22	Up	1.49e-23	aspartate--tRNA ligase 2, cytoplasmic-like [Brassica oleracea var. oleracea]
LOC106315556	6.86	17.29	1.33366	3.14e-15	Up	2.45e-16	protein TORNADO 2 [Brassica oleracea var. oleracea]
LOC106325558	2.87	7.23	1.33295	2.26e-05	Up	4.57e-06	glutathione S-transferase F12 [Brassica oleracea var. oleracea]
LOC106328413	0.79	1.99	1.33284	0.00028814	Up	7.03e-05	pentatricopeptide repeat-containing protein At3g02490, mitochondrial [Brassica oleracea var. oleracea]
LOC106310390	2.37	5.97	1.33284	4.29e-06	Up	7.75e-07	bifunctional epoxide hydrolase 2-like [Brassica oleracea var. oleracea]
LOC106342715	21.93	55.24	1.33281	7.17e-56	Up	1.54e-57	heptahelical transmembrane protein 2 [Brassica oleracea var. oleracea]
LOC106336857	4.07	10.24	1.33112	7.6e-15	Up	6.06e-16	probable arabinosyltransferase ARAD1 [Brassica oleracea var. oleracea]
LOC106344741	1.3	3.27	1.33078	0.000622852	Up	0.000162213	uncharacterized protein LOC106446894 [Brassica napus]
LOC106292835	2.68	6.74	1.33052	1.45e-05	Up	2.85e-06	histone deacetylase HDT1 [Brassica oleracea var. oleracea]
LOC106335624	1.03	2.59	1.33031	0.000106573	Up	2.4e-05	dentin sialophosphoprotein [Brassica oleracea var. oleracea]
LOC106322525	3.02	7.59	1.32955	5.78e-11	Up	6.18e-12	decapping 5-like protein [Brassica oleracea var. oleracea]
LOC106342567	2.65	6.66	1.32953	2.22e-06	Up	3.85e-07	probable 2-oxoacid dependent dioxygenase [Brassica oleracea var. oleracea]
LOC106309964	2.13	5.35	1.32868	6.37e-08	Up	9.17e-09	U-box domain-containing protein 7 [Brassica oleracea var. oleracea]
LOC106306486	4.13	10.37	1.3282	1.88e-08	Up	2.53e-09	probable xyloglucan endotransglucosylase/hydrolase protein 17 [Brassica oleracea var. oleracea]
LOC106334738	2.36	5.92	1.32681	9.93e-08	Up	1.46e-08	SNF1-related protein kinase catalytic subunit alpha KIN10-like isoform X1 [Brassica oleracea var. oleracea]
LOC106293711	2.97	7.45	1.32678	0.00044773	Up	0.000113468	protein yippee-like At4g27740 [Brassica oleracea var. oleracea]
LOC106306199	2.33	5.84	1.32564	0.00016576	Up	3.87e-05	uncharacterized protein LOC106306199 [Brassica oleracea var. oleracea]
LOC106301790	1.05	2.63	1.32467	0.000698479	Up	0.000183418	CDX94049.1|//BnaC07g36830D [Brassica napus]
LOC106323172	1.45	3.63	1.32392	1.64e-12	Up	1.54e-13	abnormal spindle-like microcephaly-associated protein homolog isoform X4 [Brassica oleracea var. oleracea]
LOC106313845	3.22	8.06	1.32372	2.11e-08	Up	2.87e-09	uncharacterized protein LOC106313845 [Brassica oleracea var. oleracea]
LOC106325080	2.85	7.13	1.32294	1.14e-06	Up	1.91e-07	uncharacterized protein LOC106325080 isoform X2 [Brassica oleracea var. oleracea]
LOC106325756	3.87	9.68	1.32267	0.000622782	Up	0.000162213	uncharacterized protein LOC106325756 [Brassica oleracea var. oleracea]
LOC106343875	18.67	46.69	1.32239	1.57e-134	Up	1.29e-136	cytochrome P450 705A5-like [Brassica oleracea var. oleracea]
LOC106329368	19.09	47.7	1.32117	7.76e-41	Up	2.3e-42	LOB domain-containing protein 41 [Brassica oleracea var. oleracea]
LOC106322785	3.47	8.67	1.3211	1.01e-10	Up	1.1e-11	PAP-specific phosphatase HAL2-like [Brassica oleracea var. oleracea]
LOC106313580	17.18	42.92	1.32092	2.17e-47	Up	5.57e-49	methionine gamma-lyase-like [Brassica napus]
LOC106331844	7.73	19.31	1.32081	1.48e-17	Up	1e-18	septum-promoting GTP-binding protein 1-like [Brassica oleracea var. oleracea]
LOC106318337	3.6	8.99	1.32032	3.45e-18	Up	2.25e-19	ATP-dependent DNA helicase DDM1 [Brassica oleracea var. oleracea]
LOC106327397	9.76	24.37	1.32015	3.53e-15	Up	2.76e-16	EPIDERMAL PATTERNING FACTOR-like protein 1 [Brassica oleracea var. oleracea]
LOC106328657	3.41	8.51	1.31939	0.000257915	Up	6.23e-05	putative lipid-transfer protein DIR1 [Brassica oleracea var. oleracea]
LOC106342016	3.07	7.66	1.31911	0.000698324	Up	0.000183418	uncharacterized protein LOC106342016 [Brassica oleracea var. oleracea]
LOC106309789	58.77	146.6	1.31873	3.77e-120	Up	3.51e-122	protein TIFY 11A-like [Brassica oleracea var. oleracea]
LOC106339421	3.28	8.18	1.31841	1.78e-06	Up	3.05e-07	3-isopropylmalate dehydratase small subunit 1 [Brassica oleracea var. oleracea]
LOC106335385	9.06	22.59	1.3181	1.08e-14	Up	8.71e-16	putative 4-hydroxy-4-methyl-2-oxoglutarate aldolase 2 [Brassica oleracea var. oleracea]
LOC106312427	2.92	7.28	1.31797	4.01e-12	Up	3.88e-13	auxin transporter-like protein 2 [Brassica oleracea var. oleracea]
LOC106329409	3.51	8.74	1.31616	9.78e-12	Up	9.77e-13	chromatin assembly factor 1 subunit FAS2 [Brassica oleracea var. oleracea]
LOC106300792	1.29	3.21	1.3152	1.87e-21	Up	1.03e-22	zinc finger BED domain-containing protein DAYSLEEPER-like [Brassica oleracea var. oleracea]
LOC106309965	2.63	6.54	1.31423	0.000400654	Up	0.000100508	universal stress protein A-like protein [Brassica oleracea var. oleracea]
LOC106321334	0.74	1.84	1.31411	0.000257946	Up	6.23e-05	uncharacterized protein LOC106321334 [Brassica oleracea var. oleracea]
LOC106318655	1.11	2.76	1.31411	0.000400747	Up	0.000100508	putative glycosyltransferase 3 [Brassica oleracea var. oleracea]
LOC106315752	2.12	5.27	1.31374	2.78e-06	Up	4.88e-07	cytochrome b561 and DOMON domain-containing protein At3g25290 [Brassica oleracea var. oleracea]
LOC106319662	1.36	3.38	1.31342	7.28e-07	Up	1.19e-07	trifunctional UDP-glucose 4,6-dehydratase/UDP-4-keto-6-deoxy-D-glucose 3,5-epimerase/UDP-4-keto-L-rhamnose-reductase RHM2-like [Brassica oleracea var. oleracea]
LOC106314474	8.29	20.6	1.3132	7.51e-10	Up	8.83e-11	uncharacterized protein LOC106314474 [Brassica oleracea var. oleracea]
LOC106322638	2.6	6.46	1.31302	1.64e-09	Up	1.99e-10	probable histone-arginine methyltransferase 1.4 isoform X1 [Brassica oleracea var. oleracea]
LOC106319864	10.51	26.11	1.31284	1.41e-18	Up	9.04e-20	uncharacterized protein YwbO [Brassica oleracea var. oleracea]
LOC106335699	13.18	32.74	1.3127	3.72e-45	Up	1e-46	adenosylhomocysteinase 2 isoform X4 [Brassica oleracea var. oleracea]
LOC106306241	106.25	263.93	1.31269	0	Up	0	cytochrome P450 81D11 [Brassica oleracea var. oleracea]
LOC106342707	63.27	157.12	1.31227	8.71e-216	Up	4.17e-218	reticuline oxidase-like protein [Brassica oleracea var. oleracea]
LOC106296466	4.1	10.18	1.31204	1.76e-13	Up	1.54e-14	uncharacterized protein At1g76660 [Brassica oleracea var. oleracea]
LOC106302779	124.97	310.25	1.31185	0	Up	0	cytochrome P450 79B1 [Brassica oleracea var. oleracea]
LOC106295911	40.6	100.78	1.31166	6.9e-105	Up	7.39e-107	glutamine synthetase cytosolic isozyme 1-3 [Brassica napus]
LOC106320392	10.46	25.96	1.31141	5.38e-27	Up	2.34e-28	UDP-glucuronic acid decarboxylase 3-like [Brassica oleracea var. oleracea]
LOC106298314	1.58	3.92	1.31093	4.89e-05	Up	1.04e-05	uncharacterized protein LOC106298314 [Brassica oleracea var. oleracea]
LOC106313607	2.33	5.78	1.31074	1.39e-07	Up	2.07e-08	glutamate dehydrogenase 2 [Brassica oleracea var. oleracea]
LOC106295516	5.87	14.56	1.31058	2.58e-17	Up	1.78e-18	mediator of RNA polymerase II transcription subunit 27 [Brassica oleracea var. oleracea]
LOC106301587	0.5	1.24	1.31034	3.35e-07	Up	5.25e-08	separase [Brassica oleracea var. oleracea]
LOC106303729	4.71	11.68	1.31024	3.85e-13	Up	3.46e-14	heat stress transcription factor B-1-like [Brassica oleracea var. oleracea]
LOC106307040	2.74	6.79	1.30924	5.56e-09	Up	7.1e-10	ethylene-responsive transcription factor ERF119 [Brassica oleracea var. oleracea]
LOC106337106	3.87	9.59	1.3092	1.04e-05	Up	1.99e-06	small ubiquitin-related modifier 5-like [Brassica rapa]
LOC106305058	5.42	13.43	1.30909	3.85e-10	Up	4.41e-11	probable 6-phosphogluconolactonase 3 [Brassica oleracea var. oleracea]
LOC106343859	0.67	1.66	1.30895	7.5e-06	Up	1.4e-06	uncharacterized protein LOC106343859 [Brassica oleracea var. oleracea]
LOC106307017	6.09	15.08	1.30812	2.29e-09	Up	2.81e-10	50S ribosomal protein L7/L12 [Brassica oleracea var. oleracea]
LOC106318449	5.82	14.41	1.30798	8.25e-16	Up	6.21e-17	putative tRNA (cytidine(32)/guanosine(34)-2'-O)-methyltransferase isoform X2 [Brassica oleracea var. oleracea]
LOC106327019	3.89	9.63	1.30777	1.36e-11	Up	1.38e-12	serine/threonine-protein kinase CDL1 [Brassica oleracea var. oleracea]
LOC106325650	1.71	4.23	1.30666	0.000358171	Up	8.89e-05	ACT domain-containing protein ACR12-like [Brassica oleracea var. oleracea]
LOC106298470	11.87	29.36	1.30653	3.23e-24	Up	1.57e-25	F-box protein PP2-B11 [Brassica oleracea var. oleracea]
LOC106342187	189.61	468.7	1.30563	0	Up	0	glutathione S-transferase F9 [Brassica oleracea var. oleracea]
LOC106310363	53.74	132.74	1.30454	1.23e-49	Up	3.01e-51	10 kDa chaperonin-like [Brassica oleracea var. oleracea]
LOC106299001	21.09	52.06	1.30362	4.5e-24	Up	2.21e-25	hypothetical protein EUTSA_v10019341mg [Eutrema salsugineum]
LOC106313350	54.13	133.59	1.30331	1.1e-58	Up	2.23e-60	histone H2B.10-like [Brassica napus]
LOC106337740	2.44	6.02	1.30288	7.13e-08	Up	1.03e-08	cell division cycle-associated protein 7 [Brassica oleracea var. oleracea]
LOC106327616	1.5	3.7	1.30256	5.99e-06	Up	1.11e-06	protein disulfide isomerase-like 1-4 [Brassica oleracea var. oleracea]
LOC106334818	6.86	16.92	1.30245	2.02e-20	Up	1.17e-21	uncharacterized protein LOC106334818 [Brassica oleracea var. oleracea]
LOC106328086	2.32	5.72	1.30189	0.000698402	Up	0.000183418	hypothetical protein EUTSA_v10004952mg [Eutrema salsugineum]
LOC106313286	2.6	6.41	1.30181	8.66e-09	Up	1.13e-09	U3 small nucleolar ribonucleoprotein protein MPP10-like isoform X2 [Brassica oleracea var. oleracea]
LOC106335724	2.41	5.94	1.30143	3.01e-07	Up	4.68e-08	uncharacterized protein LOC106335724 [Brassica oleracea var. oleracea]
LOC106324867	1.27	3.13	1.30133	0.0004007	Up	0.000100508	alpha-taxilin-like isoform X1 [Brassica oleracea var. oleracea]
LOC106325537	4.3	10.59	1.30029	1.45e-05	Up	2.85e-06	50S ribosomal protein L30 [Brassica oleracea var. oleracea]
LOC106328569	7.37	18.15	1.30023	8.75e-32	Up	3.29e-33	CRC domain-containing protein TSO1-like isoform X2 [Brassica oleracea var. oleracea]
LOC106301574	3.49	8.59	1.29943	1.3e-07	Up	1.94e-08	CDY05791.1|//BnaC07g00120D [Brassica napus]
LOC106318772	3.54	8.71	1.29892	1.35e-14	Up	1.09e-15	CDY61661.1|//BnaCnng38220D [Brassica napus]
LOC106317781	1.59	3.91	1.29814	1.22e-11	Up	1.23e-12	ATP-dependent RNA helicase DHX36 [Brassica oleracea var. oleracea]
LOC106303690	5.78	14.21	1.29777	8.99e-14	Up	7.7e-15	L-lactate dehydrogenase B-like [Brassica oleracea var. oleracea]
LOC106298600	2.27	5.58	1.29757	1.44e-05	Up	2.82e-06	interactor of constitutive active ROPs 4 [Brassica oleracea var. oleracea]
LOC106307684	7.69	18.89	1.29657	1.26e-10	Up	1.38e-11	glycine-rich RNA-binding protein GRP1A isoform X1 [Brassica oleracea var. oleracea]
LOC106341376	1.34	3.29	1.29585	0.000212989	Up	5.07e-05	CDX91393.1|//BnaC04g07570D [Brassica napus]
LOC106341839	1.98	4.86	1.29546	9.93e-08	Up	1.46e-08	3beta-hydroxysteroid-dehydrogenase/decarboxylase isoform 3 [Brassica oleracea var. oleracea]
LOC106318040	2.09	5.13	1.29546	2.48e-06	Up	4.33e-07	uncharacterized protein LOC106318040 isoform X2 [Brassica oleracea var. oleracea]
LOC106296753	1.43	3.51	1.29546	3.89e-05	Up	8.16e-06	F-box protein At1g53790 [Brassica oleracea var. oleracea]
LOC106293313	5.15	12.64	1.29535	6.91e-07	Up	1.12e-07	V-type proton ATPase subunit G2-like [Brassica oleracea var. oleracea]
LOC106301166	8.26	20.27	1.29513	1.28e-41	Up	3.75e-43	DNA replication licensing factor MCM6 isoform X1 [Brassica oleracea var. oleracea]
LOC106342119	29.07	71.33	1.29498	9.06e-86	Up	1.21e-87	jacalin-related lectin 22-like [Brassica oleracea var. oleracea]
LOC106300329	7.45	18.28	1.29495	7.82e-17	Up	5.57e-18	cyclin-dependent kinase B2-1 [Brassica oleracea var. oleracea]
LOC106328489	6.27	15.37	1.29358	1.43e-15	Up	1.1e-16	mitotic checkpoint protein BUB3.2 [Brassica oleracea var. oleracea]
LOC106309691	1.42	3.48	1.2932	0.000205685	Up	4.88e-05	uncharacterized protein LOC106309691 [Brassica oleracea var. oleracea]
LOC106296385	3.93	9.63	1.29301	3.2e-12	Up	3.06e-13	phosphatidylcholine transfer protein [Brassica oleracea var. oleracea]
LOC106342767	1.98	4.85	1.29248	1.59e-06	Up	2.71e-07	arginine biosynthesis bifunctional protein ArgJ, chloroplastic [Brassica oleracea var. oleracea]
LOC106335387	3.93	9.62	1.29151	4e-24	Up	1.95e-25	staphylococcal nuclease domain-containing protein 1 [Brassica oleracea var. oleracea]
LOC106309809	2.38	5.82	1.29006	0.000554961	Up	0.000143219	uncharacterized protein LOC106309809 [Brassica oleracea var. oleracea]
LOC106311947	3.75	9.17	1.29003	4.45e-09	Up	5.61e-10	CDX81768.1|//BnaC08g38330D [Brassica napus]
LOC106343455	2.56	6.26	1.29002	2.32e-08	Up	3.16e-09	vesicle-associated protein 2-2-like [Brassica oleracea var. oleracea]
LOC106300811	65.34	159.76	1.28987	3.53e-175	Up	2.19e-177	E3 ubiquitin-protein ligase RGLG2 [Brassica oleracea var. oleracea]
LOC106298402	5.76	14.08	1.28951	1.01e-10	Up	1.1e-11	CDY64761.1|//BnaC06g42780D [Brassica napus]
LOC106327691	3.65	8.92	1.28915	3.84e-10	Up	4.4e-11	E3 ubiquitin-protein ligase RGLG1-like [Brassica oleracea var. oleracea]
LOC106328724	2.17	5.3	1.2883	3.97e-09	Up	4.98e-10	putative pre-mRNA-splicing factor ATP-dependent RNA helicase PRP1 [Brassica oleracea var. oleracea]
LOC106295785	7.55	18.44	1.28829	4.18e-07	Up	6.62e-08	uncharacterized protein LOC106295785 [Brassica oleracea var. oleracea]
LOC106307215	3.47	8.47	1.28743	8.03e-14	Up	6.84e-15	KH domain-containing protein At4g18375-like [Brassica oleracea var. oleracea]
LOC106325016	1.64	4	1.2863	1.44e-05	Up	2.82e-06	E3 ubiquitin-protein ligase RNF8-B isoform X2 [Brassica oleracea var. oleracea]
LOC106343114	14.5	35.36	1.28607	2.7e-36	Up	9.04e-38	polyadenylate-binding protein-interacting protein 11 [Brassica oleracea var. oleracea]
LOC106325008	1.87	4.56	1.286	4.32e-06	Up	7.8e-07	uncharacterized protein LOC106325008 [Brassica oleracea var. oleracea]
LOC106301566	20.55	50.1	1.28567	1.08e-54	Up	2.4e-56	WD-40 repeat-containing protein MSI2-like [Brassica napus]
LOC106328177	2.81	6.85	1.28553	7.76e-12	Up	7.67e-13	histone-lysine N-methyltransferase, H3 lysine-9 specific SUVH4 [Brassica oleracea var. oleracea]
LOC106306155	11.16	27.2	1.28527	3.5e-57	Up	7.31e-59	phospholipase D delta-like [Brassica oleracea var. oleracea]
LOC106342049	2.47	6.02	1.28525	1.97e-10	Up	2.19e-11	uncharacterized protein LOC106342049 [Brassica oleracea var. oleracea]
LOC106341278	2.98	7.26	1.28466	1.51e-11	Up	1.54e-12	reticuline oxidase-like protein [Brassica oleracea var. oleracea]
LOC106313615	1.95	4.75	1.28445	4.58e-08	Up	6.47e-09	transcription factor EGL1 isoform X2 [Brassica oleracea var. oleracea]
LOC106327140	1.93	4.7	1.28406	0.000105293	Up	2.37e-05	heptahelical transmembrane protein 1-like [Brassica oleracea var. oleracea]
LOC106318321	9.01	21.94	1.28397	1.54e-25	Up	7.1e-27	dolichyl-diphosphooligosaccharide--protein glycosyltransferase 48 kDa subunit-like [Brassica oleracea var. oleracea]
LOC106293892	1.29	3.14	1.28339	1.01e-06	Up	1.68e-07	WEB family protein At3g02930, chloroplastic-like [Brassica oleracea var. oleracea]
LOC106309929	2.19	5.33	1.2832	0.000318991	Up	7.85e-05	uncharacterized protein LOC103841883 [Brassica rapa]
LOC106332003	3.33	8.1	1.2824	0.000319029	Up	7.85e-05	uncharacterized protein LOC106332003 [Brassica oleracea var. oleracea]
LOC106303547	4.68	11.38	1.28192	9.94e-14	Up	8.54e-15	peptidyl-prolyl cis-trans isomerase FKBP53 [Brassica oleracea var. oleracea]
LOC106323866	9.35	22.73	1.28156	1.02e-28	Up	4.21e-30	UDP-glycosyltransferase 84A2-like [Brassica oleracea var. oleracea]
LOC106328476	2.82	6.85	1.28041	1.44e-05	Up	2.82e-06	mediator-associated protein 2-like [Brassica oleracea var. oleracea]
LOC106336142	1.05	2.55	1.28011	8.28e-06	Up	1.56e-06	CSC1-like protein At4g35870 [Brassica oleracea var. oleracea]
LOC106299184	1.5	3.64	1.27898	0.000447679	Up	0.000113468	receptor for activated C kinase 1B [Brassica oleracea var. oleracea]
LOC106334742	16.06	38.94	1.27778	1.07e-52	Up	2.46e-54	T-complex protein 1 subunit epsilon-like [Brassica oleracea var. oleracea]
LOC106308066	1.32	3.2	1.27753	5.1e-11	Up	5.42e-12	condensin complex subunit 1 [Brassica oleracea var. oleracea]
LOC106296896	8.85	21.45	1.27723	5.95e-13	Up	5.42e-14	WPP domain-containing protein 2 [Brassica oleracea var. oleracea]
LOC106316133	2.15	5.21	1.27695	3.72e-07	Up	5.86e-08	ATP-dependent 6-phosphofructokinase 6 [Brassica oleracea var. oleracea]
LOC106307758	5.31	12.86	1.27611	8.26e-13	Up	7.61e-14	aldo-keto reductase family 4 member C11 [Brassica oleracea var. oleracea]
LOC106308146	10.84	26.25	1.27595	7.54e-37	Up	2.49e-38	beta-myrcene/(E)-beta-ocimene synthase 2, chloroplastic isoform X1 [Brassica oleracea var. oleracea]
LOC106337254	0.76	1.84	1.27563	2.24e-05	Up	4.51e-06	histone-lysine N-methyltransferase ATX1 isoform X1 [Brassica oleracea var. oleracea]
LOC106319050	1.57	3.8	1.27523	0.000284384	Up	6.92e-05	cardiolipin synthase (CMP-forming), mitochondrial [Brassica oleracea var. oleracea]
LOC106319171	1.36	3.29	1.27448	9.52e-05	Up	2.13e-05	CDX98571.1|//BnaC05g38040D [Brassica napus]
LOC106331739	17.79	43.03	1.27428	2.62e-16	Up	1.92e-17	protein NIM1-INTERACTING 1 [Brassica oleracea var. oleracea]
LOC106305817	5.54	13.4	1.27428	1.63e-09	Up	1.98e-10	uncharacterized protein LOC106305817 [Brassica oleracea var. oleracea]
LOC106343914	8.91	21.55	1.27419	2.39e-29	Up	9.58e-31	NAD(H) kinase 1-like isoform X2 [Brassica oleracea var. oleracea]
LOC106306240	0.98	2.37	1.27403	0.000183181	Up	4.31e-05	gamma-glutamyltranspeptidase 3-like [Brassica oleracea var. oleracea]
LOC106337498	2.3	5.56	1.27345	1.72e-07	Up	2.61e-08	protein ABSCISIC ACID-INSENSITIVE 5 [Brassica oleracea var. oleracea]
LOC106336095	2.45	5.92	1.27282	3.43e-10	Up	3.91e-11	probable serine/threonine-protein kinase DDB_G0280111 [Brassica oleracea var. oleracea]
LOC106309564	28.76	69.45	1.27191	1.34e-43	Up	3.71e-45	glutathione S-transferase DHAR1, mitochondrial-like [Brassica oleracea var. oleracea]
LOC106333639	1.69	4.08	1.27155	0.000288105	Up	7.03e-05	INO80 complex subunit B-like [Brassica oleracea var. oleracea]
LOC106343681	1.38	3.33	1.27085	8.51e-05	Up	1.89e-05	E3 ubiquitin-protein ligase RGLG1-like isoform X1 [Brassica oleracea var. oleracea]
LOC106328415	2.72	6.56	1.27009	3.38e-10	Up	3.84e-11	probable methyltransferase PMT23 [Brassica oleracea var. oleracea]
LOC106302091	8.68	20.93	1.26981	1.46e-19	Up	8.84e-21	uncharacterized protein LOC106302091 [Brassica oleracea var. oleracea]
LOC106298172	6.89	16.61	1.26948	5.16e-07	Up	8.25e-08	uncharacterized protein LOC106298172 [Brassica oleracea var. oleracea]
LOC106343613	14.98	36.11	1.26936	8.37e-30	Up	3.31e-31	putative lactoylglutathione lyase [Brassica oleracea var. oleracea]
LOC106309871	3.88	9.35	1.26891	1.16e-10	Up	1.27e-11	calmodulin-binding protein 60 F-like isoform X1 [Brassica oleracea var. oleracea]
LOC106319167	1.88	4.53	1.26878	8.38e-15	Up	6.71e-16	serine/threonine-protein kinase ULK4 [Brassica oleracea var. oleracea]
LOC106295626	6.45	15.54	1.26862	1.35e-32	Up	4.97e-34	receptor like protein kinase S.2 [Brassica oleracea var. oleracea]
LOC106312988	10.42	25.1	1.26833	2.08e-27	Up	8.96e-29	uncharacterized protein At1g04910-like [Brassica oleracea var. oleracea]
LOC106327984	1.37	3.3	1.26829	1.51e-07	Up	2.26e-08	uncharacterized protein LOC106327984 isoform X2 [Brassica oleracea var. oleracea]
LOC106328233	4.9	11.8	1.26793	5.04e-19	Up	3.14e-20	tropinone reductase homolog At2g29300-like isoform X1 [Brassica oleracea var. oleracea]
LOC106317974	5.13	12.35	1.26748	0.000555024	Up	0.000143219	mitochondrial import receptor subunit TOM7-2-like [Brassica oleracea var. oleracea]
LOC106324663	3.67	8.83	1.26663	3.6e-11	Up	3.78e-12	notchless protein homolog [Brassica oleracea var. oleracea]
LOC106336049	5.52	13.28	1.26652	4.94e-19	Up	3.07e-20	protein ASPARTIC PROTEASE IN GUARD CELL 1-like [Brassica oleracea var. oleracea]
LOC106298718	2.36	5.67	1.26456	0.000768806	Up	0.000203254	uncharacterized protein LOC106298718 [Brassica oleracea var. oleracea]
LOC106309702	1.57	3.77	1.2638	0.000252644	Up	6.09e-05	transcription factor RF2b-like [Brassica oleracea var. oleracea]
LOC106343984	1.15	2.76	1.26303	0.000205635	Up	4.88e-05	LOW QUALITY PROTEIN: decapping nuclease DXO homolog, chloroplastic-like [Brassica oleracea var. oleracea]
LOC106294572	1.08	2.59	1.26192	0.00020566	Up	4.88e-05	3-ketoacyl-CoA synthase 1 [Brassica oleracea var. oleracea]
LOC106327805	68.23	163.61	1.26178	4.62e-73	Up	7.31e-75	histone H3.2-like [Brassica oleracea var. oleracea]
LOC106307049	15.77	37.81	1.26158	5.19e-77	Up	7.7e-79	leucine-rich repeat extensin-like protein 5 [Brassica napus]
LOC106337314	1.61	3.86	1.26154	5.36e-05	Up	1.15e-05	methyltransferase-like protein 16 isoform X2 [Brassica oleracea var. oleracea]
LOC106340064	53.22	127.56	1.26114	8.19e-42	Up	2.38e-43	phytosulfokines 2 [Brassica oleracea var. oleracea]
LOC106313909	9.53	22.84	1.26101	1.74e-12	Up	1.64e-13	60S ribosomal protein L12-3 [Brassica oleracea var. oleracea]
LOC106292668	21.25	50.88	1.25964	2.35e-42	Up	6.75e-44	bifunctional dTDP-4-dehydrorhamnose 3,5-epimerase/dTDP-4-dehydrorhamnose reductase-like [Brassica oleracea var. oleracea]
LOC106340048	8.99	21.52	1.25928	1.09e-15	Up	8.3e-17	replication protein A 32 kDa subunit A [Brassica oleracea var. oleracea]
LOC106307513	4.93	11.8	1.25913	1.34e-13	Up	1.17e-14	leucine-rich repeat extensin-like protein 4 [Brassica oleracea var. oleracea]
LOC106319126	3.52	8.42	1.25825	1.32e-11	Up	1.34e-12	UDP-glucose 6-dehydrogenase 3-like [Brassica oleracea var. oleracea]
LOC106334258	1.33	3.18	1.2576	0.00028435	Up	6.92e-05	mitochondrial phosphate carrier protein 3, mitochondrial [Brassica oleracea var. oleracea]
LOC106339527	3.66	8.75	1.25744	2.04e-08	Up	2.77e-09	sister chromatid cohesion protein DCC1 [Brassica oleracea var. oleracea]
LOC106298982	3.82	9.13	1.25704	5.85e-11	Up	6.25e-12	tRNA-specific adenosine deaminase 2 isoform X1 [Brassica oleracea var. oleracea]
LOC106311644	1	2.39	1.25701	1.02e-05	Up	1.95e-06	serine/threonine-protein kinase ATM-like [Brassica oleracea var. oleracea]
LOC106298566	2.18	5.21	1.25696	0.000252614	Up	6.09e-05	uncharacterized protein At2g39795, mitochondrial [Brassica oleracea var. oleracea]
LOC106292798	6.83	16.32	1.25668	5.33e-12	Up	5.22e-13	myb-relatedprotein Myb4-like [Brassica napus]
LOC106336330	14.02	33.5	1.25667	5.28e-40	Up	1.6e-41	cytochrome P450 76C2-like isoform X1 [Brassica oleracea var. oleracea]
LOC106318966	39.23	93.66	1.25548	2.59e-129	Up	2.19e-131	probable indole-3-acetic acid-amido synthetase GH3.5 [Brassica oleracea var. oleracea]
LOC106315486	0.88	2.1	1.25481	1.98e-06	Up	3.41e-07	phosphoglucan, water dikinase, chloroplastic [Brassica oleracea var. oleracea]
LOC106310378	3.47	8.28	1.25469	7.39e-06	Up	1.38e-06	glutathione S-transferase U25-like [Brassica oleracea var. oleracea]
LOC106336519	1.97	4.7	1.25446	2.72e-12	Up	2.59e-13	protein CHROMATIN REMODELING 24 [Brassica oleracea var. oleracea]
LOC106317879	75.25	179.5	1.25422	6.69e-145	Up	5.02e-147	36.4 kDa proline-rich protein [Brassica napus]
LOC106298540	1.93	4.6	1.25303	7.39e-05	Up	1.62e-05	probable protein S-acyltransferase 6 [Brassica oleracea var. oleracea]
LOC106307783	2.77	6.6	1.25258	1.03e-14	Up	8.32e-16	DNA replication licensing factor MCM2-like [Brassica oleracea var. oleracea]
LOC106301177	2.41	5.74	1.25202	2.25e-11	Up	2.32e-12	WD repeat-containing protein 75-like [Brassica oleracea var. oleracea]
LOC106301973	3.07	7.31	1.25163	1.41e-08	Up	1.88e-09	protein MID1-COMPLEMENTING ACTIVITY 1-like [Brassica oleracea var. oleracea]
LOC106297768	1.63	3.88	1.25118	0.000682106	Up	0.00017866	uncharacterized protein LOC106297768 [Brassica oleracea var. oleracea]
LOC106307269	3.29	7.83	1.25093	1e-09	Up	1.19e-10	uncharacterized protein LOC106307269 [Brassica oleracea var. oleracea]
LOC106319435	2.29	5.45	1.25091	9.04e-06	Up	1.72e-06	inositol 3-kinase [Brassica oleracea var. oleracea]
LOC106321129	2.16	5.14	1.25074	4.25e-06	Up	7.66e-07	thermospermine synthase ACAULIS5 [Brassica oleracea var. oleracea]
LOC106313240	2.35	5.59	1.25019	2.16e-06	Up	3.76e-07	probable E3 ubiquitin-protein ligase LUL3 [Brassica oleracea var. oleracea]
LOC106313307	2.06	4.9	1.25014	2.34e-07	Up	3.59e-08	cleft lip and palate transmembrane protein 1 homolog isoform X2 [Brassica oleracea var. oleracea]
LOC106306335	5.4	12.84	1.24961	5.24e-15	Up	4.14e-16	tubulin beta-9 chain-like [Brassica oleracea var. oleracea]
LOC106317096	2.05	4.87	1.2483	4.59e-07	Up	7.3e-08	4-substituted benzoates-glutamate ligase GH3.12-like [Brassica oleracea var. oleracea]
LOC106328536	12.65	30.02	1.24679	9.6e-50	Up	2.34e-51	DNA replication licensing factor MCM5 [Brassica oleracea var. oleracea]
LOC106319005	13	30.84	1.24629	8.13e-56	Up	1.75e-57	diacylglycerol kinase 2 [Brassica oleracea var. oleracea]
LOC106318153	4.04	9.58	1.24567	2.44e-06	Up	4.25e-07	cysteine proteinase inhibitor 6-like [Brassica oleracea var. oleracea]
LOC106295968	1.94	4.6	1.24558	1.57e-06	Up	2.67e-07	O-glucosyltransferase rumi [Brassica oleracea var. oleracea]
LOC106334983	1.59	3.77	1.24554	8.03e-06	Up	1.51e-06	casein kinase I-like [Brassica oleracea var. oleracea]
LOC106313099	1.59	3.77	1.24554	1.45e-07	Up	2.18e-08	kinesin-3 [Brassica oleracea var. oleracea]
LOC106295496	33.02	78.28	1.2453	1.99e-53	Up	4.5e-55	uncharacterized protein LOC106295496 [Brassica oleracea var. oleracea]
LOC106342859	1.08	2.56	1.24511	3.89e-09	Up	4.87e-10	DNA-directed RNA polymerase IV subunit 1-like [Brassica oleracea var. oleracea]
LOC106301288	20.5	48.59	1.24504	7.25e-44	Up	2.01e-45	ribonucleoside-diphosphate reductase small chain C-like [Brassica rapa]
LOC106313401	6.08	14.41	1.24493	1.7e-15	Up	1.31e-16	fe(2+) transport protein 3, chloroplastic [Brassica oleracea var. oleracea]
LOC106305604	1.11	2.63	1.2445	1.19e-07	Up	1.76e-08	probable WRKY transcription factor 19 isoform X2 [Brassica oleracea var. oleracea]
LOC106306745	10.95	25.94	1.24425	2.54e-46	Up	6.66e-48	BTB/POZ domain-containing protein At5g66560 [Brassica oleracea var. oleracea]
LOC106307377	11.55	27.34	1.24312	3.72e-34	Up	1.32e-35	monoglyceride lipase-like [Brassica oleracea var. oleracea]
LOC106297325	16.59	39.27	1.24311	6.98e-13	Up	6.39e-14	probable small nuclear ribonucleoprotein G [Brassica rapa]
LOC106295892	11.26	26.63	1.24185	1.01e-26	Up	4.46e-28	multiple organellar RNA editing factor 8, chloroplastic/mitochondrial-like [Brassica oleracea var. oleracea]
LOC106339520	2.96	7	1.24176	4.98e-07	Up	7.97e-08	4-hydroxy-tetrahydrodipicolinate reductase 1, chloroplastic [Brassica oleracea var. oleracea]
LOC106296391	19.71	46.6	1.2414	5.66e-37	Up	1.86e-38	PLASMODESMATA CALLOSE-BINDING PROTEIN 4 isoform X2 [Brassica napus]
LOC106307120	24.1	56.94	1.24041	5.76e-82	Up	8.05e-84	D-3-phosphoglycerate dehydrogenase 1, chloroplastic-like [Brassica oleracea var. oleracea]
LOC106332335	2.76	6.52	1.2402	7.71e-07	Up	1.26e-07	1-aminocyclopropane-1-carboxylate oxidase homolog 1-like [Brassica oleracea var. oleracea]
LOC106315484	4.75	11.22	1.24007	2.52e-08	Up	3.46e-09	UMP-CMP kinase 3-like [Brassica oleracea var. oleracea]
LOC106308469	8.62	20.36	1.23998	7e-65	Up	1.28e-66	DNA topoisomerase 2 [Brassica oleracea var. oleracea]
LOC106326971	10.75	25.39	1.23992	6.81e-28	Up	2.87e-29	ATP phosphoribosyltransferase 1, chloroplastic [Brassica oleracea var. oleracea]
LOC106337606	1.88	4.44	1.23983	4.62e-06	Up	8.38e-07	A/G-specific adenine DNA glycosylase isoform X2 [Brassica oleracea var. oleracea]
LOC106312523	1.14	2.69	1.23857	0.000391205	Up	9.78e-05	probable pectate lyase 1 [Brassica oleracea var. oleracea]
LOC106328580	3.76	8.87	1.2382	0.000156362	Up	3.63e-05	uncharacterized protein LOC106328580 isoform X1 [Brassica oleracea var. oleracea]
LOC106332306	3.43	8.09	1.23793	4.98e-07	Up	7.97e-08	probable membrane-associated kinase regulator 5 [Brassica oleracea var. oleracea]
LOC106300119	2.51	5.92	1.23791	4.51e-10	Up	5.2e-11	DEAD-box ATP-dependent RNA helicase 52 [Brassica oleracea var. oleracea]
LOC106306625	5.86	13.82	1.23778	9.61e-13	Up	8.89e-14	CDX72436.1|//BnaC07g44580D [Brassica napus]
LOC106341901	10.69	25.21	1.23773	1.18e-25	Up	5.42e-27	protein STRICTOSIDINE SYNTHASE-LIKE 13 isoform X1 [Brassica oleracea var. oleracea]
LOC106343330	7.31	17.23	1.23698	7.58e-22	Up	4.09e-23	cytochrome P450 72A15 isoform X1 [Brassica oleracea var. oleracea]
LOC106329505	25.17	59.32	1.23681	8.76e-71	Up	1.41e-72	CDX84830.1|//BnaA03g14000D [Brassica napus]
LOC106334673	2.03	4.78	1.23553	1.63e-07	Up	2.47e-08	peptide-N4-(N-acetyl-beta-glucosaminyl)asparagine amidase A-like [Brassica oleracea var. oleracea]
LOC106325424	3.14	7.39	1.23481	6.56e-05	Up	1.43e-05	uncharacterized protein LOC106325424 [Brassica oleracea var. oleracea]
LOC106330955	2.15	5.06	1.2348	1.77e-11	Up	1.82e-12	calcium-transporting ATPase 2, plasma membrane-type-like [Brassica oleracea var. oleracea]
LOC106311829	14.77	34.76	1.23476	2.34e-26	Up	1.04e-27	UPF0725 protein At1g23970-like isoform X2 [Brassica oleracea var. oleracea]
LOC106328024	4.36	10.26	1.23463	1.38e-14	Up	1.12e-15	chaperonin CPN60, mitochondrial [Brassica oleracea var. oleracea]
LOC106310447	4.7	11.06	1.23462	1.24e-05	Up	2.4e-06	uncharacterized protein LOC106310447 [Brassica oleracea var. oleracea]
LOC106319024	0.85	2	1.23446	3.63e-06	Up	6.49e-07	WD repeat-containing protein 6 isoform X2 [Brassica oleracea var. oleracea]
LOC106334557	2.96	6.96	1.23349	2.74e-08	Up	3.77e-09	DEAD-box ATP-dependent RNA helicase 2-like [Brassica rapa]
LOC106342705	2.82	6.62	1.23114	5.81e-18	Up	3.85e-19	uncharacterized protein LOC106342705 isoform X2 [Brassica oleracea var. oleracea]
LOC106301103	133.84	313.67	1.22874	2.82e-273	Up	9.87e-276	caffeic acid 3-O-methyltransferase-like [Brassica oleracea var. oleracea]
LOC106332762	4.14	9.69	1.22687	0.000176366	Up	4.14e-05	uncharacterized protein LOC106332762 [Brassica oleracea var. oleracea]
LOC106335807	1.91	4.47	1.2267	9.04e-06	Up	1.72e-06	probable arabinosyltransferase ARAD1 [Brassica oleracea var. oleracea]
LOC106315934	3.47	8.12	1.22654	2.07e-07	Up	3.17e-08	uncharacterized protein LOC103846711 [Brassica rapa]
LOC106318763	4.15	9.71	1.22636	7.98e-09	Up	1.03e-09	replication factor C subunit 2 [Brassica rapa]
LOC106342172	163.43	382.34	1.22618	0	Up	0	adenosylhomocysteinase 1 [Brassica oleracea var. oleracea]
LOC106315525	3.89	9.1	1.2261	7.98e-09	Up	1.03e-09	transcription factor DIVARICATA [Brassica oleracea var. oleracea]
LOC106339497	8.55	20	1.226	1.19e-06	Up	2e-07	uncharacterized protein LOC106339497 [Brassica oleracea var. oleracea]
LOC106309801	3.13	7.32	1.22568	5.24e-07	Up	8.4e-08	uncharacterized protein LOC106309801 isoform X1 [Brassica oleracea var. oleracea]
LOC106295060	3.22	7.53	1.22559	3.61e-12	Up	3.47e-13	LOW QUALITY PROTEIN: polynucleotide 3'-phosphatase ZDP [Brassica oleracea var. oleracea]
LOC106295380	40.69	95.15	1.22553	5.99e-119	Up	5.6e-121	phospho-2-dehydro-3-deoxyheptonate aldolase 1, chloroplastic-like [Brassica oleracea var. oleracea]
LOC106336863	0.95	2.22	1.22456	0.000213041	Up	5.07e-05	uncharacterized protein LOC106336863 isoform X1 [Brassica oleracea var. oleracea]
LOC106335988	2.91	6.8	1.22452	9.81e-07	Up	1.62e-07	serine/threonine-protein phosphatase PP1 isozyme 6-like [Brassica oleracea var. oleracea]
LOC106328229	1.31	3.06	1.22396	2.96e-05	Up	6.08e-06	patatin-like protein 6 [Brassica oleracea var. oleracea]
LOC106301379	7.45	17.4	1.22378	2.32e-29	Up	9.29e-31	LOW QUALITY PROTEIN: protein DA1-related 5 [Brassica oleracea var. oleracea]
LOC106322512	1.76	4.11	1.22356	9.76e-06	Up	1.86e-06	CDX91599.1|//BnaC02g15610D [Brassica napus]
LOC106293791	119.75	279.63	1.22349	2.53e-77	Up	3.74e-79	60S ribosomal protein L29-1-like [Brassica rapa]
LOC106306040	3.8	8.87	1.22294	4.95e-12	Up	4.83e-13	protein phosphatase 2C 56-like [Brassica oleracea var. oleracea]
LOC106307055	7.9	18.44	1.22291	1.91e-08	Up	2.58e-09	uncharacterized protein LOC106307055 isoform X1 [Brassica oleracea var. oleracea]
LOC106313362	4.14	9.66	1.22239	1.92e-11	Up	1.97e-12	glutamate-rich WD repeat-containing protein 1-like isoform X2 [Brassica oleracea var. oleracea]
LOC106300822	1.24	2.89	1.22073	1.19e-06	Up	2e-07	uncharacterized protein LOC106300822 [Brassica oleracea var. oleracea]
LOC106341909	25.48	59.38	1.22061	3.82e-48	Up	9.62e-50	CDY17912.1|//BnaC04g03070D [Brassica napus]
LOC106313805	7.15	16.66	1.22037	3.2e-12	Up	3.07e-13	lipid phosphate phosphatase gamma, chloroplastic [Brassica oleracea var. oleracea]
LOC106318145	4.22	9.83	1.21995	2.99e-17	Up	2.07e-18	serine/threonine-protein phosphatase 6 regulatory ankyrin repeat subunit A-like [Brassica oleracea var. oleracea]
LOC106313662	2.32	5.4	1.21883	0.000114171	Up	2.59e-05	adenine phosphoribosyltransferase 5-like [Brassica oleracea var. oleracea]
LOC106342487	1.07	2.49	1.21853	4.55e-05	Up	9.67e-06	G-type lectin S-receptor-like serine/threonine-protein kinase At1g11280 isoform X2 [Brassica oleracea var. oleracea]
LOC106300809	4.85	11.28	1.21771	1.17e-18	Up	7.43e-20	amyrin synthase LUP2-like [Brassica oleracea var. oleracea]
LOC106315850	5.59	13	1.21759	4.23e-08	Up	5.96e-09	unknwn protein
LOC106310361	4.49	10.44	1.21733	1.49e-12	Up	1.4e-13	selenium-binding protein 1-like isoform X2 [Brassica oleracea var. oleracea]
LOC106335243	2.19	5.09	1.21673	1.42e-09	Up	1.71e-10	beta-galactosidase 10 [Brassica oleracea var. oleracea]
LOC106328110	7.59	17.64	1.21668	2.04e-16	Up	1.49e-17	UDP-arabinopyranose mutase 1-like [Brassica oleracea var. oleracea]
LOC106339467	2.21	5.13	1.21491	8.64e-06	Up	1.63e-06	UDP-N-acetylglucosamine--dolichyl-phosphate N-acetylglucosaminephosphotransferase-like [Brassica oleracea var. oleracea]
LOC106309976	19.31	44.8	1.21415	8.47e-35	Up	2.94e-36	transcription factor MYB34-like isoform X1 [Brassica oleracea var. oleracea]
LOC106296505	2.5	5.8	1.21412	1.91e-05	Up	3.82e-06	E3 ubiquitin-protein ligase At3g02290-like [Brassica oleracea var. oleracea]
LOC106340237	4.66	10.8	1.21263	2.85e-06	Up	5.02e-07	SKP1-like protein 1A [Brassica oleracea var. oleracea]
LOC106327991	1.89	4.38	1.21254	7.65e-06	Up	1.44e-06	probable galacturonosyltransferase-like 6 [Brassica oleracea var. oleracea]
LOC106329034	5.78	13.39	1.21202	5.12e-08	Up	7.29e-09	cold shock protein 2-like [Brassica oleracea var. oleracea]
LOC106312272	6.23	14.43	1.21177	1.64e-13	Up	1.43e-14	uncharacterized protein LOC106312272 [Brassica oleracea var. oleracea]
LOC106297065	0.57	1.32	1.2115	0.000732524	Up	0.000192892	protein BREAST CANCER SUSCEPTIBILITY 2 homolog B-like [Brassica oleracea var. oleracea]
LOC106292849	2.41	5.58	1.21123	0.000682182	Up	0.00017866	protein E6-like [Brassica oleracea var. oleracea]
LOC106300878	47.07	108.97	1.21105	1.99e-123	Up	1.81e-125	IAA-amino acid hydrolase ILR1-like 4 [Brassica oleracea var. oleracea]
LOC106300593	4.92	11.39	1.21104	1.04e-09	Up	1.25e-10	formamidopyrimidine-DNA glycosylase isoform X2 [Brassica oleracea var. oleracea]
LOC106328291	2.51	5.81	1.21085	5.13e-08	Up	7.29e-09	NEDD8 ultimate buster 1 [Brassica oleracea var. oleracea]
LOC106295970	2.26	5.23	1.21049	5.26e-10	Up	6.09e-11	U3 small nucleolar RNA-associated protein 4 [Brassica oleracea var. oleracea]
LOC106323872	1.06	2.45	1.20872	0.000240878	Up	5.79e-05	25S rRNA (cytosine-C(5))-methyltransferase nop2 [Brassica oleracea var. oleracea]
LOC106340506	32.94	76.13	1.20863	4.57e-63	Up	8.52e-65	transcription factor bHLH19 [Brassica oleracea var. oleracea]
LOC106333154	2.09	4.83	1.20852	4.41e-19	Up	2.73e-20	uncharacterized protein LOC106333154 [Brassica oleracea var. oleracea]
LOC106307020	1.48	3.42	1.2084	1.05e-11	Up	1.05e-12	myosin-15-like isoform X2 [Brassica oleracea var. oleracea]
LOC106298236	2.35	5.43	1.20829	4.72e-12	Up	4.59e-13	CDX79403.1|//BnaC06g19000D [Brassica napus]
LOC106309708	44.43	102.65	1.20813	6.31e-69	Up	1.05e-70	ng cell nuclear antigen [Brassica napus]
LOC106306798	2.32	5.36	1.20811	1.54e-11	Up	1.56e-12	auxin response factor 5-like [Brassica oleracea var. oleracea]
LOC106292847	4.75	10.97	1.20756	5.13e-08	Up	7.29e-09	probable complex I intermediate-associated protein 30 [Brassica oleracea var. oleracea]
LOC106328338	1.39	3.21	1.20749	0.000240907	Up	5.79e-05	IRK-interacting protein-like [Brassica oleracea var. oleracea]
LOC106336621	3.43	7.92	1.20729	0.000418568	Up	0.000105577	uncharacterized protein LOC106336621 [Brassica oleracea var. oleracea]
LOC106328770	6.74	15.56	1.20702	2.36e-16	Up	1.73e-17	lysine histidine transporter-like 6 [Brassica oleracea var. oleracea]
LOC106318793	4	9.23	1.20633	2.09e-16	Up	1.53e-17	pollen-specific leucine-rich repeat extensin-like protein 1 [Brassica oleracea var. oleracea]
LOC106319482	1.53	3.53	1.20614	0.000213015	Up	5.07e-05	CDY30325.1|//BnaA09g09520D [Brassica napus]
LOC106340162	16.11	37.15	1.20541	1.12e-19	Up	6.74e-21	uncharacterized protein LOC106340162 [Brassica oleracea var. oleracea]
LOC106293495	2.91	6.71	1.20529	0.000936011	Up	0.000251776	cell wall / vacuolar inhibitor of fructosidase 1-like [Brassica oleracea var. oleracea]
LOC106339873	1.54	3.55	1.20489	0.000645638	Up	0.000168637	uncharacterized protein LOC106339873 [Brassica oleracea var. oleracea]
LOC106311990	1.51	3.48	1.20454	0.00012218	Up	2.79e-05	uncharacterized protein LOC106311990 [Brassica oleracea var. oleracea]
LOC106309664	0.46	1.06	1.20436	0.000443283	Up	0.000112264	myosin-8 [Brassica oleracea var. oleracea]
LOC106335029	0.69	1.59	1.20436	0.000176344	Up	4.14e-05	probable pre-mRNA-splicing factor ATP-dependent RNA helicase [Brassica oleracea var. oleracea]
LOC106303052	4.47	10.3	1.2043	1.85e-13	Up	1.62e-14	receptor-like kinase TMK3 [Brassica oleracea var. oleracea]
LOC106301907	12.83	29.56	1.20412	2.62e-28	Up	1.09e-29	nudix hydrolase 8 [Brassica oleracea var. oleracea]
LOC106311617	1.65	3.8	1.20353	0.000108235	Up	2.44e-05	glutamate-rich WD repeat-containing protein 1-like [Brassica oleracea var. oleracea]
LOC106292553	2.18	5.02	1.20336	1.32e-08	Up	1.76e-09	putative metallophosphoesterase At3g03305 isoform X2 [Brassica oleracea var. oleracea]
LOC106303617	1.59	3.66	1.20282	0.000732605	Up	0.000192892	nuclear pore complex protein NUP43 [Brassica oleracea var. oleracea]
LOC106336850	1.26	2.9	1.20263	3.72e-07	Up	5.85e-08	condensin complex subunit 3 [Brassica oleracea var. oleracea]
LOC106339307	9.77	22.48	1.20221	6.09e-15	Up	4.83e-16	uncharacterized protein LOC106339307 [Brassica oleracea var. oleracea]
LOC106307646	5.77	13.26	1.20044	5.7e-12	Up	5.59e-13	cyclin-D3-3-like [Brassica oleracea var. oleracea]
LOC106329410	4.57	10.5	1.20012	0.000534656	Up	0.000137589	hypothetical protein POPTR_0168s00200g [Populus trichocarpa]
LOC106296429	1.11	2.55	1.19994	0.000996809	Up	0.000269352	UDP-glucuronic acid decarboxylase 2-like [Brassica oleracea var. oleracea]
LOC106326050	12.91	29.64	1.19906	1.05e-10	Up	1.15e-11	replication protein A 14 kDa subunit B [Brassica rapa]
LOC106336537	2.13	4.89	1.19898	1.13e-06	Up	1.89e-07	NAC domain-containing protein 53 [Brassica oleracea var. oleracea]
LOC106303600	1.32	3.03	1.19878	0.000122196	Up	2.79e-05	uncharacterized protein LOC106303600 [Brassica oleracea var. oleracea]
LOC106337646	33.17	76.12	1.1984	1.52e-78	Up	2.2e-80	cytochrome P450 81D1-like [Brassica oleracea var. oleracea]
LOC106328824	26.47	60.72	1.19781	6.82e-61	Up	1.31e-62	uncharacterized protein LOC106328824 [Brassica oleracea var. oleracea]
LOC106336364	4.39	10.07	1.19777	2.71e-15	Up	2.11e-16	leucine-rich repeat receptor-like protein kinase PXC1 [Brassica oleracea var. oleracea]
LOC106344848	2.39	5.48	1.19717	0.000213068	Up	5.07e-05	probable carboxylesterase 5 [Brassica oleracea var. oleracea]
LOC106343566	2.98	6.83	1.19657	7.67e-10	Up	9.03e-11	malonate--CoA ligase [Brassica oleracea var. oleracea]
LOC106298206	2.16	4.95	1.1964	2.05e-05	Up	4.11e-06	CDX73119.1|//BnaC06g35670D [Brassica napus]
LOC106328375	13.58	31.12	1.19636	2.03e-39	Up	6.3e-41	acyl-coenzyme A thioesterase 8 [Brassica rapa]
LOC106312404	6.28	14.39	1.19623	1.2e-26	Up	5.3e-28	DNA ligase 1-like [Brassica oleracea var. oleracea]
LOC106301915	2.1	4.81	1.19565	1.01e-07	Up	1.49e-08	microtubule-associated protein 70-2-like [Brassica oleracea var. oleracea]
LOC106305548	6.37	14.59	1.19562	3.56e-05	Up	7.43e-06	CDY03511.1|//BnaC01g15710D [Brassica napus]
LOC106329108	1.83	4.19	1.19511	0.000346786	Up	8.59e-05	homeobox-leucine zipper protein ATHB-16-like [Brassica oleracea var. oleracea]
LOC106336135	7.46	17.08	1.19506	5.12e-19	Up	3.19e-20	MADS-box protein SOC1-like isoform X1 [Brassica oleracea var. oleracea]
LOC106320573	7.19	16.46	1.1949	5.3e-16	Up	3.96e-17	sugar transporter ERD6-like 18 isoform X1 [Brassica oleracea var. oleracea]
LOC106306711	8.77	20.07	1.19439	7.1e-24	Up	3.5e-25	protein COBRA [Brassica oleracea var. oleracea]
LOC106335741	6.26	14.32	1.1938	5.18e-24	Up	2.54e-25	probable serine/threonine-protein kinase At1g54610 [Brassica oleracea var. oleracea]
LOC106292843	3.8	8.69	1.19336	5.47e-08	Up	7.82e-09	uncharacterized protein LOC106292843 [Brassica oleracea var. oleracea]
LOC106292471	23.27	53.2	1.19295	7.1e-24	Up	3.5e-25	myelin transcription factor 1-like [Brassica oleracea var. oleracea]
LOC106335315	1.05	2.4	1.19264	1.74e-06	Up	2.99e-07	nucleolar protein 6 [Brassica oleracea var. oleracea]
LOC106313314	1.75	4	1.19264	1.04e-05	Up	1.99e-06	U-box domain-containing protein 41 [Brassica oleracea var. oleracea]
LOC106339479	1.89	4.32	1.19264	0.000645566	Up	0.000168637	uncharacterized protein LOC106339479 isoform X1 [Brassica oleracea var. oleracea]
LOC106338116	6.82	15.58	1.19185	2.62e-05	Up	5.34e-06	40S ribosomal protein S3-2-like [Brassica oleracea var. oleracea]
LOC106315998	5.03	11.49	1.19175	1.24e-08	Up	1.65e-09	ras-related protein RABC2a [Brassica oleracea var. oleracea]
LOC106322519	10.07	22.99	1.19094	1.86e-19	Up	1.13e-20	ribonucleoside-diphosphate reductase small chain C-like [Brassica rapa]
LOC106295759	22.27	50.83	1.19058	2.23e-84	Up	3.06e-86	mRNA-capping enzyme [Brassica oleracea var. oleracea]
LOC106304563	5.89	13.44	1.19019	3.09e-14	Up	2.56e-15	serine/threonine-protein kinase OXI1 [Brassica oleracea var. oleracea]
LOC106327672	2.24	5.11	1.18982	6.5e-14	Up	5.5e-15	uncharacterized protein LOC106327672 [Brassica oleracea var. oleracea]
LOC106342198	23.87	54.43	1.1892	1.68e-49	Up	4.13e-51	MYB transcription factor 91-2 [Brassica napus]
LOC106339679	4.39	10.01	1.18915	8.88e-15	Up	7.13e-16	uncharacterized protein LOC106339679 [Brassica oleracea var. oleracea]
LOC106319221	1.36	3.1	1.18866	1.67e-07	Up	2.52e-08	uncharacterized protein LOC106319221 [Brassica oleracea var. oleracea]
LOC106325081	3.08	7.02	1.18854	0.00047391	Up	0.000120573	probable E3 ubiquitin-protein ligase RHA2B [Brassica oleracea var. oleracea]
LOC106321255	3.16	7.2	1.18807	3.86e-09	Up	4.83e-10	uncharacterized protein LOC106321255 [Brassica oleracea var. oleracea]
LOC106304268	1.73	3.94	1.18742	0.000996701	Up	0.000269352	GATA transcription factor 9-like [Brassica oleracea var. oleracea]
LOC106292493	2.02	4.6	1.18728	8.13e-06	Up	1.53e-06	uncharacterized protein LOC106292493 [Brassica oleracea var. oleracea]
LOC106309608	6.57	14.96	1.18714	2.38e-16	Up	1.75e-17	dihydrolipoyllysine-residue succinyltransferase component of 2-oxoglutarate dehydrogenase complex 2, mitochondrial-like isoform X2 [Brassica oleracea var. oleracea]
LOC106306814	1.95	4.44	1.18709	2.62e-05	Up	5.34e-06	uncharacterized protein LOC106306814 [Brassica oleracea var. oleracea]
LOC106301840	1.59	3.62	1.18696	4.48e-07	Up	7.12e-08	kinesin-like protein KIF22 isoform X1 [Brassica oleracea var. oleracea]
LOC106318232	1.41	3.21	1.18688	2.34e-09	Up	2.89e-10	elongator complex protein 1 [Brassica oleracea var. oleracea]
LOC106304152	4.25	9.67	1.18605	9.2e-06	Up	1.75e-06	vesicle transport v-SNARE 12 [Brassica rapa]
LOC106325209	4.31	9.8	1.18509	4.48e-07	Up	7.12e-08	CDY70081.1|//BnaCnng66600D [Brassica napus]
LOC106339723	2.67	6.07	1.18486	3.29e-07	Up	5.14e-08	DNA primase small subunit-like [Brassica oleracea var. oleracea]
LOC106335133	4.83	10.98	1.18478	2.68e-11	Up	2.79e-12	shikimate O-hydroxycinnamoyltransferase [Brassica oleracea var. oleracea]
LOC106309716	18.02	40.96	1.18462	6.08e-20	Up	3.6e-21	E3 ubiquitin-protein ligase RHA1B [Brassica oleracea var. oleracea]
LOC106306928	9.83	22.34	1.18437	8.02e-33	Up	2.93e-34	CDY30787.1|//BnaC07g16870D [Brassica napus]
LOC106344201	1.95	4.43	1.18383	0.000166353	Up	3.88e-05	GDP-mannose 4,6 dehydratase 2-like [Brassica oleracea var. oleracea]
LOC106311594	17.22	39.12	1.18382	1.11e-28	Up	4.56e-30	translocon-associated protein subunit alpha [Brassica oleracea var. oleracea]
LOC106292887	4.16	9.45	1.18373	2.79e-05	Up	5.7e-06	glycine-rich cell wall structural protein-like [Brassica napus]
LOC106315562	1.92	4.36	1.18322	0.000569933	Up	0.000147333	probable carboxylesterase 120 [Brassica oleracea var. oleracea]
LOC106324714	52.38	118.92	1.1829	1.69e-85	Up	2.26e-87	protein TIFY 10B-like [Brassica oleracea var. oleracea]
LOC106337567	20.88	47.39	1.18246	5.42e-26	Up	2.46e-27	glutathione S-transferase U4-like [Brassica oleracea var. oleracea]
LOC106336734	9.11	20.67	1.18202	2.04e-24	Up	9.84e-26	probable polyamine oxidase 2 [Brassica oleracea var. oleracea]
LOC106301146	3.58	8.12	1.18152	3.2e-09	Up	3.98e-10	F-box protein SKIP22-like [Brassica oleracea var. oleracea]
LOC106335960	1.38	3.13	1.18149	2.79e-05	Up	5.7e-06	pseudouridylate synthase 7 homolog [Brassica oleracea var. oleracea]
LOC106318288	201.18	456.24	1.18131	0	Up	0	S-adenosylmethionine synthase [Brassica oleracea var. oleracea]
LOC106328410	1000.94	2269.73	1.18117	0	Up	0	acid phosphatase 1-like [Brassica oleracea var. oleracea]
LOC106301124	14.45	32.75	1.18043	2.14e-33	Up	7.73e-35	protein WALLS ARE THIN 1 [Brassica oleracea var. oleracea]
LOC106316111	2.29	5.19	1.18039	0.000996594	Up	0.000269352	uncharacterized protein LOC106316111 [Brassica oleracea var. oleracea]
LOC106316620	9.67	21.91	1.18	9.41e-18	Up	6.29e-19	prohibitin-1, mitochondrial [Brassica rapa]
LOC106294051	19.01	43.06	1.17959	2.44e-35	Up	8.37e-37	peroxisomal (S)-2-hydroxy-acid oxidase GLO3-like [Brassica oleracea var. oleracea]
LOC106296630	103.2	233.7	1.17921	3.05e-144	Up	2.32e-146	bark lectin isoform 2-like [Brassica oleracea var. oleracea]
LOC106342227	2.51	5.68	1.1782	1.41e-05	Up	2.76e-06	origin of replication complex subunit 2 [Brassica oleracea var. oleracea]
LOC106293429	2.32	5.25	1.17819	0.000138312	Up	3.18e-05	50S ribosomal protein L21, mitochondrial-like [Brassica oleracea var. oleracea]
LOC106313668	4.61	10.43	1.1779	1.56e-07	Up	2.35e-08	prohibitin-4, mitochondrial [Brassica rapa]
LOC106327793	1.76	3.98	1.17719	3.49e-07	Up	5.47e-08	uncharacterized protein LOC106327793 [Brassica oleracea var. oleracea]
LOC106296929	26.64	60.21	1.17641	8.59e-36	Up	2.9e-37	ferritin-3, chloroplastic [Brassica oleracea var. oleracea]
LOC106329325	10.63	24.01	1.17549	1.29e-13	Up	1.12e-14	RNA-binding protein 8A-B-like [Brassica oleracea var. oleracea]
LOC106327973	2.36	5.33	1.17535	3.24e-11	Up	3.38e-12	homeobox-leucine zipper protein ATHB-15-like [Brassica oleracea var. oleracea]
LOC106341750	1.79	4.04	1.1744	0.000418617	Up	0.000105577	CDY42623.1|//BnaC01g00350D [Brassica napus]
LOC106312186	24.56	55.43	1.17436	3.41e-22	Up	1.81e-23	histone H2B.8-like [Brassica napus]
LOC106336799	4.34	9.78	1.17214	9.95e-12	Up	9.94e-13	UDP-glycosyltransferase 71B2-like [Brassica oleracea var. oleracea]
LOC106306892	1.82	4.1	1.17169	0.000240937	Up	5.79e-05	probable protein arginine N-methyltransferase 1.2 [Brassica oleracea var. oleracea]
LOC106307754	22.41	50.48	1.17157	5.72e-41	Up	1.69e-42	annexin D1-like [Brassica oleracea var. oleracea]
LOC106304040	7.43	16.73	1.171	7.89e-06	Up	1.48e-06	CDY58182.1|//BnaCnng32810D [Brassica napus]
LOC106312150	1.51	3.4	1.17099	5.6e-06	Up	1.03e-06	uncharacterized protein LOC106312150 [Brassica oleracea var. oleracea]
LOC106333229	4.26	9.59	1.17068	0.000996486	Up	0.000269352	transport protein sec61 subunit gamma-1 [Arabidopsis thaliana]
LOC106320549	1.16	2.61	1.16993	1.25e-05	Up	2.42e-06	lysine-specific demethylase JMJ25 [Brassica oleracea var. oleracea]
LOC106324638	30.38	68.35	1.16982	1.88e-56	Up	3.98e-58	protein RETICULATA-RELATED 3 [Brassica oleracea var. oleracea]
LOC106337628	7.38	16.6	1.16949	4.53e-08	Up	6.4e-09	CDX79544.1|//BnaC03g18800D [Brassica napus]
LOC106342601	2.61	5.87	1.16931	1.32e-08	Up	1.75e-09	cationic amino acid transporter 3, mitochondrial [Brassica oleracea var. oleracea]
LOC106336675	13.94	31.35	1.16924	2.84e-34	Up	1e-35	UDP-N-acetylglucosamine diphosphorylase 2 isoform X2 [Brassica oleracea var. oleracea]
LOC106309830	14.14	31.78	1.16834	3.48e-14	Up	2.9e-15	glycine-rich RNA-binding protein 2, mitochondrial-like [Brassica napus]
LOC106309549	3.04	6.83	1.16781	9.36e-07	Up	1.55e-07	lipid phosphate phosphatase 2 [Brassica oleracea var. oleracea]
LOC106296434	7.26	16.31	1.16772	1.04e-22	Up	5.36e-24	uncharacterized protein At5g08430-like [Brassica oleracea var. oleracea]
LOC106315774	8.36	18.78	1.16762	7.18e-10	Up	8.44e-11	nascent polypeptide-associated complex subunit alpha-like protein 3 [Brassica oleracea var. oleracea]
LOC106331277	2.07	4.65	1.1676	6e-06	Up	1.11e-06	V-type proton ATPase subunit H-like isoform X1 [Brassica oleracea var. oleracea]
LOC106301242	12.4	27.82	1.16578	1.37e-43	Up	3.81e-45	DNA replication licensing factor MCM3 [Brassica oleracea var. oleracea]
LOC106328279	9.7	21.75	1.16496	4.39e-37	Up	1.44e-38	DNA replication licensing factor MCM4 [Brassica oleracea var. oleracea]
LOC106298512	5.49	12.31	1.16495	7.8e-05	Up	1.72e-05	dolichol-phosphate mannosyltransferase subunit 3 [Brassica oleracea var. oleracea]
LOC106306800	6.53	14.64	1.16476	8.36e-25	Up	3.97e-26	vacuolar protein sorting-associated protein 35A [Brassica oleracea var. oleracea]
LOC106327030	25.41	56.95	1.1643	1.36e-46	Up	3.55e-48	protein LURP-one-related 15-like [Brassica napus]
LOC106344003	2.7	6.05	1.16398	1.91e-05	Up	3.82e-06	probable galacturonosyltransferase-like 3 [Brassica oleracea var. oleracea]
LOC106307475	5.28	11.83	1.16384	9.24e-10	Up	1.09e-10	probable aquaporin PIP2-5 [Brassica oleracea var. oleracea]
LOC106306959	13.43	30.08	1.16335	1.08e-35	Up	3.66e-37	auxilin-related protein 2-like [Brassica oleracea var. oleracea]
LOC106315931	3.02	6.76	1.16247	0.00077389	Up	0.000204824	uncharacterized protein C119.09c-like [Brassica oleracea var. oleracea]
LOC106301877	43.38	97.08	1.16214	6.26e-70	Up	1.03e-71	homeobox-leucine zipper protein HAT2 [Brassica oleracea var. oleracea]
LOC106318410	1.85	4.14	1.1621	3.52e-08	Up	4.92e-09	G-type lectin S-receptor-like serine/threonine-protein kinase SD2-2 [Brassica oleracea var. oleracea]
LOC106336388	1.43	3.2	1.16206	3.33e-05	Up	6.9e-06	probable serine/threonine-protein kinase DDB_G0278509 [Brassica oleracea var. oleracea]
LOC106304344	6.87	15.37	1.16173	4.17e-07	Up	6.61e-08	uncharacterized protein LOC106304344 [Brassica oleracea var. oleracea]
LOC106334550	1.61	3.6	1.16094	0.000391759	Up	9.79e-05	BTB/POZ and TAZ domain-containing protein 4 [Brassica oleracea var. oleracea]
LOC106298429	24.06	53.79	1.1607	9.25e-34	Up	3.32e-35	protein TIFY 10B-like isoform X1 [Brassica oleracea var. oleracea]
LOC106294616	7.15	15.97	1.15935	6.8e-13	Up	6.22e-14	transcription factor BPE-like [Brassica oleracea var. oleracea]
LOC106316255	2.86	6.38	1.15754	1.15e-05	Up	2.23e-06	uncharacterized mitochondrial protein AtMg00810-like [Brassica oleracea var. oleracea]
LOC106296795	8.79	19.6	1.15692	7.24e-15	Up	5.77e-16	cytosolic sulfotransferase 18 [Brassica oleracea var. oleracea]
LOC106295609	11.91	26.55	1.15654	1.4e-21	Up	7.63e-23	uncharacterized protein At4g15545 [Brassica oleracea var. oleracea]
LOC106296618	75.26	167.72	1.1561	1.12e-90	Up	1.41e-92	kunitz-type serine protease inhibitor DrTI-like [Brassica oleracea var. oleracea]
LOC106322729	0.92	2.05	1.15592	6.56e-05	Up	1.43e-05	uncharacterized protein LOC106322729 [Brassica oleracea var. oleracea]
LOC106336117	111.46	248.16	1.15474	2.5e-219	Up	1.17e-221	CDY07636.1|//BnaA03g18750D [Brassica napus]
LOC106295922	5.48	12.2	1.15463	2.95e-08	Up	4.08e-09	E3 ubiquitin-protein ligase RNF4 [Brassica oleracea var. oleracea]
LOC106305936	5.89	13.11	1.15433	2.21e-14	Up	1.82e-15	AP-4 complex subunit mu-like [Brassica oleracea var. oleracea]
LOC106321041	1.38	3.07	1.15357	3.33e-05	Up	6.9e-06	P-loop NTPase domain-containing protein LPA1 homolog 2 [Brassica oleracea var. oleracea]
LOC106296921	4.06	9.03	1.15325	2.35e-11	Up	2.43e-12	uncharacterized protein LOC106296921 isoform X1 [Brassica oleracea var. oleracea]
LOC106335377	1.92	4.27	1.15313	4.35e-09	Up	5.48e-10	DNA mismatch repair protein MSH2 [Brassica oleracea var. oleracea]
LOC106296339	3.85	8.56	1.15275	0.000114185	Up	2.59e-05	histone H2A variant 1 [Brassica oleracea var. oleracea]
LOC106332731	1.57	3.49	1.15246	0.000344869	Up	8.54e-05	uncharacterized protein LOC106332731 isoform X2 [Brassica oleracea var. oleracea]
LOC106328174	30.35	67.42	1.15148	4.38e-66	Up	7.7e-68	ultraviolet-B receptor UVR8 [Brassica oleracea var. oleracea]
LOC106342316	4.79	10.64	1.1514	1.03e-16	Up	7.39e-18	nuclear pore complex protein NUP62 [Brassica oleracea var. oleracea]
LOC106334531	1.63	3.62	1.15112	9.73e-06	Up	1.85e-06	putative U-box domain-containing protein 46 [Brassica oleracea var. oleracea]
LOC106301792	2.04	4.53	1.15094	0.000289383	Up	7.06e-05	protein FMP32, mitochondrial-like [Brassica oleracea var. oleracea]
LOC106311660	6.4	14.21	1.15076	7.12e-46	Up	1.88e-47	protein NETWORKED 1D [Brassica oleracea var. oleracea]
LOC106306352	3.59	7.97	1.1506	1.98e-23	Up	9.96e-25	DNA polymerase alpha catalytic subunit isoform X2 [Brassica oleracea var. oleracea]
LOC106332038	1.73	3.84	1.15033	4.84e-05	Up	1.03e-05	protein TRANSPARENT TESTA 12-like [Brassica oleracea var. oleracea]
LOC106302059	6.71	14.89	1.14996	3e-14	Up	2.49e-15	growth-regulating factor 2-like [Brassica oleracea var. oleracea]
LOC106342001	1.05	2.33	1.14994	2.59e-05	Up	5.27e-06	1,4-alpha-glucan-branching enzyme 2-1, chloroplastic/amyloplastic [Brassica oleracea var. oleracea]
LOC106342454	3.3	7.32	1.14938	8.87e-05	Up	1.97e-05	CDY30273.1|//BnaC04g31840D [Brassica napus]
LOC106296365	23.37	51.81	1.14857	6.2e-31	Up	2.39e-32	zinc finger A20 and AN1 domain-containing stress-associated protein 2 [Brassica oleracea var. oleracea]
LOC106313677	2.82	6.25	1.14816	5.45e-09	Up	6.96e-10	crossover junction endonuclease MUS81 [Brassica oleracea var. oleracea]
LOC106342500	3.66	8.11	1.14786	5.45e-09	Up	6.96e-10	uncharacterized protein LOC106342500 [Brassica oleracea var. oleracea]
LOC106295969	4.22	9.34	1.14618	6.42e-07	Up	1.04e-07	uncharacterized protein LOC106295969 [Brassica oleracea var. oleracea]
LOC106324723	2.16	4.78	1.14598	0.000135464	Up	3.11e-05	flavonol synthase/flavanone 3-hydroxylase-like [Brassica oleracea var. oleracea]
LOC106313714	5.26	11.64	1.14596	1.25e-11	Up	1.27e-12	uncharacterized transporter YBR287W-like [Brassica oleracea var. oleracea]
LOC106316163	0.52	1.15	1.14505	1.31e-05	Up	2.55e-06	separase-like [Brassica oleracea var. oleracea]
LOC106295003	1.95	4.31	1.14421	0.000503031	Up	0.000128643	GATA transcription factor 11-like isoform X1 [Brassica oleracea var. oleracea]
LOC106315572	16.72	36.95	1.144	4.87e-16	Up	3.62e-17	copper transporter 5-like [Brassica oleracea var. oleracea]
LOC106327648	3.48	7.69	1.1439	3.77e-16	Up	2.79e-17	leucine-rich repeat receptor-like protein kinase PXC2 [Brassica oleracea var. oleracea]
LOC106294472	14.35	31.71	1.14389	2.79e-13	Up	2.48e-14	uncharacterized protein LOC106294472 [Brassica oleracea var. oleracea]
LOC106311620	7.2	15.91	1.14386	6.2e-17	Up	4.38e-18	WD-40 repeat-containing protein MSI4-like [Brassica oleracea var. oleracea]
LOC106305645	5.03	11.11	1.14323	2.21e-07	Up	3.39e-08	transcription factor bHLH27 [Brassica oleracea var. oleracea]
LOC106320122	1.68	3.71	1.14296	1.69e-05	Up	3.34e-06	LOW QUALITY PROTEIN: putative ATP-dependent RNA helicase DHX33 [Brassica oleracea var. oleracea]
LOC106343782	6.97	15.39	1.14276	7.49e-13	Up	6.87e-14	auxin-responsive protein IAA26 isoform X1 [Brassica rapa]
LOC106342306	0.77	1.7	1.1426	0.000387843	Up	9.68e-05	ATP-dependent helicase rhp16-like isoform X2 [Brassica oleracea var. oleracea]
LOC106331787	14.69	32.42	1.14205	2.16e-34	Up	7.58e-36	MATE efflux family protein 5-like [Brassica oleracea var. oleracea]
LOC106310592	4.7	10.37	1.14168	7.8e-05	Up	1.72e-05	uncharacterized protein LOC106310592 [Brassica oleracea var. oleracea]
LOC106323078	5.04	11.12	1.14166	1.39e-10	Up	1.53e-11	50S ribosomal protein L3-2, chloroplastic-like [Brassica oleracea var. oleracea]
LOC106336185	3.12	6.88	1.14086	3.72e-17	Up	2.59e-18	structural maintenance of chromosomes protein 2-1 [Brassica oleracea var. oleracea]
LOC106309990	25.61	56.43	1.13976	2.06e-22	Up	1.08e-23	DNA-directed RNA polymerases II, IV and V subunit 8B [Brassica rapa]
LOC106330082	7.63	16.81	1.13956	0.000526555	Up	0.000135351	probable small nuclear ribonucleoprotein Sm D1 [Brassica oleracea var. oleracea]
LOC106294964	12.47	27.47	1.13939	4.19e-18	Up	2.75e-19	uncharacterized protein LOC106294964 [Brassica oleracea var. oleracea]
LOC106315732	15.28	33.66	1.13939	3.29e-14	Up	2.74e-15	unknwn protein
LOC106334684	4.16	9.16	1.13876	1.22e-10	Up	1.34e-11	uncharacterized aarF domain-containing protein kinase At5g05200, chloroplastic [Brassica oleracea var. oleracea]
LOC106315821	3.17	6.98	1.13874	5.18e-06	Up	9.45e-07	CDY13988.1|//BnaC09g38380D [Brassica napus]
LOC106342398	22.34	49.19	1.13874	1.17e-53	Up	2.64e-55	cytochrome P450 98A3-like [Brassica oleracea var. oleracea]
LOC106331065	1.19	2.62	1.13861	7.03e-09	Up	9.07e-10	LOW QUALITY PROTEIN: U5 small nuclear ribonucleoprotein 200 kDa helicase-like [Brassica oleracea var. oleracea]
LOC106322948	3.08	6.78	1.13836	3.28e-09	Up	4.09e-10	DNA polymerase alpha subunit B [Brassica oleracea var. oleracea]
LOC106303882	2.09	4.6	1.13813	0.000463618	Up	0.000117806	homeobox-leucine zipper protein HAT1 [Brassica oleracea var. oleracea]
LOC106301519	5.54	12.19	1.13774	7.12e-14	Up	6.04e-15	argininosuccinate synthase, chloroplastic-like [Brassica oleracea var. oleracea]
LOC106331523	5	11	1.1375	4.21e-10	Up	4.84e-11	coiled-coil domain-containing protein R3HCC1L [Brassica oleracea var. oleracea]
LOC106339901	3.9	8.58	1.1375	7.56e-06	Up	1.42e-06	probable xyloglucan endotransglucosylase/hydrolase protein 32 [Brassica oleracea var. oleracea]
LOC106292527	17.14	37.69	1.13681	8.69e-21	Up	4.92e-22	40S ribosomal protein S10, mitochondrial isoform X2 [Brassica oleracea var. oleracea]
LOC106323095	1.82	4	1.13606	6.56e-05	Up	1.43e-05	probable serine/threonine-protein kinase At4g35230 [Brassica oleracea var. oleracea]
LOC106337305	28.29	62.17	1.13593	3.21e-30	Up	1.25e-31	protein C2-DOMAIN ABA-RELATED 1-like [Brassica oleracea var. oleracea]
LOC106304791	2.65	5.82	1.13503	3.82e-12	Up	3.68e-13	probable RNA-dependent RNA polymerase 5 isoform X2 [Brassica oleracea var. oleracea]
LOC106339900	7.05	15.48	1.13471	3.68e-11	Up	3.86e-12	GATA transcription factor 2-like [Brassica oleracea var. oleracea]
LOC106322654	4.71	10.34	1.13444	2.64e-08	Up	3.62e-09	uncharacterized protein LOC106322654 isoform X1 [Brassica oleracea var. oleracea]
LOC106318711	3.79	8.32	1.13439	1.51e-06	Up	2.56e-07	translocase of chloroplast 34, chloroplastic [Brassica oleracea var. oleracea]
LOC106306097	2.62	5.75	1.134	4.49e-13	Up	4.05e-14	probable LRR receptor-like serine/threonine-protein kinase At4g36180 [Brassica oleracea var. oleracea]
LOC106339770	1.03	2.26	1.13368	0.00026738	Up	6.48e-05	subtilisin-like protease SBT2.4 [Brassica oleracea var. oleracea]
LOC106295388	7.12	15.62	1.13345	3.48e-19	Up	2.15e-20	probable methyltransferase PMT20 [Brassica oleracea var. oleracea]
LOC106320458	8.17	17.92	1.13316	2.58e-35	Up	8.86e-37	protein argonaute 10 isoform X1 [Brassica oleracea var. oleracea]
LOC106309845	81.29	178.3	1.13316	1.62e-58	Up	3.31e-60	uncharacterized protein LOC106309845 [Brassica oleracea var. oleracea]
LOC106331861	2.95	6.47	1.13305	0.000151367	Up	3.51e-05	phytochromobilin:ferredoxin oxidoreductase, chloroplastic-like isoform X2 [Brassica oleracea var. oleracea]
LOC106336578	2.13	4.67	1.13257	4.01e-06	Up	7.2e-07	NEDD8-activating enzyme E1 regulatory subunit isoform X1 [Brassica oleracea var. oleracea]
LOC106301829	1.52	3.33	1.13145	0.000207053	Up	4.92e-05	NAC domain-containing protein 8-like [Brassica oleracea var. oleracea]
LOC106342642	6.49	14.21	1.13062	1.45e-10	Up	1.59e-11	cyclin-dependent kinase B1-1 [Brassica oleracea var. oleracea]
LOC106311366	3.97	8.69	1.13022	1.03e-06	Up	1.71e-07	alpha-ketoglutarate-dependent dioxygenase alkB homolog 2 [Brassica oleracea var. oleracea]
LOC106317933	6.1	13.34	1.12888	1.28e-14	Up	1.04e-15	calcium-dependent protein kinase 12-like [Brassica oleracea var. oleracea]
LOC106307891	2.73	5.97	1.12883	4.11e-05	Up	8.66e-06	trihelix transcription factor ASIL1 isoform X2 [Brassica oleracea var. oleracea]
LOC106318171	4.29	9.38	1.12861	7.78e-14	Up	6.62e-15	uncharacterized protein LOC106318171 [Brassica oleracea var. oleracea]
LOC106335467	2.42	5.29	1.12826	1.13e-13	Up	9.72e-15	serine/threonine-protein kinase TIO [Brassica oleracea var. oleracea]
LOC106327191	6.12	13.36	1.12632	1.65e-09	Up	2.01e-10	26S proteasome non-ATPase regulatory subunit 14 homolog [Brassica oleracea var. oleracea]
LOC106324850	2.35	5.13	1.1263	0.000105059	Up	2.36e-05	zinc finger CCCH domain-containing protein 25-like [Brassica oleracea var. oleracea]
LOC106328523	11.13	24.29	1.12591	1.91e-19	Up	1.16e-20	glyceraldehyde-3-phosphate dehydrogenase, cytosolic-like [Brassica oleracea var. oleracea]
LOC106342277	6.43	14.02	1.1246	2.39e-11	Up	2.48e-12	cyclin-D3-3-like [Brassica oleracea var. oleracea]
LOC106311337	3.78	8.24	1.12426	6.96e-12	Up	6.86e-13	pentatricopeptide repeat-containing protein At3g49240-like [Brassica oleracea var. oleracea]
LOC106341999	23.32	50.81	1.12355	5.98e-47	Up	1.55e-48	fasciclin-like arabinogalactan protein 15 [Brassica oleracea var. oleracea]
LOC106307673	7.57	16.49	1.12323	1.33e-14	Up	1.08e-15	putative nuclease HARBI1 [Brassica oleracea var. oleracea]
LOC106337590	28.82	62.76	1.12278	8.5e-24	Up	4.21e-25	glutaredoxin-C2 [Brassica oleracea var. oleracea]
LOC106307911	1.41	3.07	1.12254	0.000119124	Up	2.71e-05	serine/threonine-protein kinase ATG1 [Brassica oleracea var. oleracea]
LOC106300853	1.43	3.11	1.1209	0.000105046	Up	2.36e-05	BEL1-like homeodomain protein 3 [Brassica oleracea var. oleracea]
LOC106296747	2.53	5.5	1.12029	5.94e-09	Up	7.61e-10	chromatin assembly factor 1 subunit FAS1 [Brassica oleracea var. oleracea]
LOC106303591	5.3	11.52	1.12008	9.35e-07	Up	1.54e-07	ERBB-3 BINDING PROTEIN 1-like isoform X2 [Brassica oleracea var. oleracea]
LOC106295974	5.02	10.91	1.11989	1.57e-07	Up	2.36e-08	TIMELESS-interacting protein [Brassica oleracea var. oleracea]
LOC106306993	34.72	75.45	1.11975	2.47e-76	Up	3.71e-78	probable L-cysteine desulfhydrase, chloroplastic [Brassica oleracea var. oleracea]
LOC106301647	8.33	18.1	1.1196	6.89e-13	Up	6.3e-14	prohibitin-4, mitochondrial [Brassica oleracea var. oleracea]
LOC106335779	2.32	5.04	1.1193	0.000832912	Up	0.000221904	nucleolin 1-like isoform X3 [Brassica oleracea var. oleracea]
LOC106295277	3.6	7.82	1.11917	1.06e-05	Up	2.03e-06	uncharacterized protein LOC106295277 [Brassica oleracea var. oleracea]
LOC106306789	2.27	4.93	1.11889	0.000344828	Up	8.54e-05	RRP15-like protein [Brassica oleracea var. oleracea]
LOC106300171	3.09	6.71	1.11871	1.79e-14	Up	1.47e-15	receptor-like protein kinase HSL1 [Brassica oleracea var. oleracea]
LOC106295863	5.25	11.4	1.11864	4.67e-05	Up	9.94e-06	CDY19734.1|//BnaA09g03870D [Brassica napus]
LOC106325193	1.46	3.17	1.11851	0.000492058	Up	0.000125564	uncharacterized protein LOC106325193 isoform X2 [Brassica oleracea var. oleracea]
LOC106320398	5.03	10.92	1.11834	7.97e-08	Up	1.16e-08	vesicle-associated membrane protein 711 [Brassica oleracea var. oleracea]
LOC106317451	1.35	2.93	1.11794	3.62e-05	Up	7.54e-06	(E,E)-geranyllinalool synthase [Brassica oleracea var. oleracea]
LOC106296587	3.35	7.27	1.11779	1.6e-13	Up	1.4e-14	synaptonemal complex protein 1-like isoform X1 [Brassica oleracea var. oleracea]
LOC106304066	6.18	13.41	1.11763	6.39e-11	Up	6.86e-12	protein TIFY 8 isoform X2 [Brassica oleracea var. oleracea]
LOC106302122	2.36	5.12	1.11736	2.37e-05	Up	4.81e-06	patellin-6-like [Brassica oleracea var. oleracea]
LOC106336171	1.01	2.19	1.11658	4.73e-06	Up	8.59e-07	kinesin-related protein 4 isoform X1 [Brassica oleracea var. oleracea]
LOC106296203	5.3	11.49	1.11631	4.01e-06	Up	7.2e-07	uncharacterized GPI-anchored protein At3g06035 [Brassica oleracea var. oleracea]
LOC106315639	22.05	47.79	1.11593	1.26e-26	Up	5.58e-28	PLASMODESMATA CALLOSE-BINDING PROTEIN 2 [Brassica oleracea var. oleracea]
LOC106307536	10.84	23.48	1.11507	1.04e-21	Up	5.64e-23	chaperone protein dnaJ 10-like isoform X2 [Brassica oleracea var. oleracea]
LOC106296813	1.69	3.66	1.11482	0.000526615	Up	0.000135351	transcription factor TCP15-like [Brassica oleracea var. oleracea]
LOC106296730	1.69	3.66	1.11482	6.14e-07	Up	9.92e-08	DNA ligase 1 isoform X5 [Brassica oleracea var. oleracea]
LOC106329695	5.47	11.84	1.11406	4.01e-06	Up	7.2e-07	protein EXPORTIN 1A-like [Brassica napus]
LOC106296142	1.1	2.38	1.11346	0.000160081	Up	3.72e-05	U-box domain-containing protein 35 [Brassica oleracea var. oleracea]
LOC106336995	5.81	12.57	1.11338	1.71e-10	Up	1.9e-11	protein DJ-1 homolog A-like [Brassica oleracea var. oleracea]
LOC106336464	2.64	5.71	1.11295	1.07e-06	Up	1.78e-07	protein NUCLEAR FUSION DEFECTIVE 4-like [Brassica oleracea var. oleracea]
LOC106343089	6.14	13.28	1.11295	2.09e-15	Up	1.61e-16	dihomomethionine N-hydroxylase-like [Brassica oleracea var. oleracea]
LOC106303415	18.49	39.99	1.11289	6.21e-20	Up	3.68e-21	probable protein phosphatase 2C 58 [Brassica oleracea var. oleracea]
LOC106309879	3.94	8.52	1.11266	2.1e-06	Up	3.64e-07	probable uridine nucleosidase 2 [Brassica oleracea var. oleracea]
LOC106303963	1.42	3.07	1.11235	0.000622154	Up	0.000161977	formin-like protein 4 [Brassica oleracea var. oleracea]
LOC106301195	2.42	5.23	1.1118	1.37e-05	Up	2.67e-06	zinc finger protein CONSTANS-LIKE 15-like [Brassica oleracea var. oleracea]
LOC106335131	13.91	30.05	1.11124	3.35e-18	Up	2.19e-19	glycine-rich RNA-binding protein 10-like [Brassica napus]
LOC106321534	2.89	6.24	1.11048	2.89e-13	Up	2.58e-14	RNA-dependent RNA polymerase 1 [Brassica oleracea var. oleracea]
LOC106329105	3.59	7.75	1.11021	4.59e-09	Up	5.81e-10	adenylosuccinate lyase-like [Brassica oleracea var. oleracea]
LOC106319394	50.84	109.75	1.11018	5.02e-99	Up	5.67e-101	fasciclin-like arabinogalactan protein 1 [Brassica oleracea var. oleracea]
LOC106329121	13.99	30.19	1.10967	6.22e-29	Up	2.53e-30	nicotinamide adenine dinucleotide transporter 2, mitochondrial [Brassica oleracea var. oleracea]
LOC106325725	1.97	4.25	1.10927	0.000407565	Up	0.000102504	uncharacterized protein LOC106325725 isoform X2 [Brassica oleracea var. oleracea]
LOC106302189	2.67	5.76	1.10923	2.8e-05	Up	5.72e-06	uncharacterized protein LOC106324327 [Brassica oleracea var. oleracea]
LOC106339726	3.7	7.98	1.10886	0.00027758	Up	6.74e-05	xylogen-like protein 11 [Brassica oleracea var. oleracea]
LOC106318908	1.86	4.01	1.1083	3.21e-08	Up	4.47e-09	uncharacterized protein LOC106318908 [Brassica oleracea var. oleracea]
LOC106292580	9.11	19.64	1.10827	1.16e-13	Up	1.01e-14	uncharacterized protein LOC106292580 isoform X2 [Brassica oleracea var. oleracea]
LOC106292612	10.87	23.43	1.108	1.76e-11	Up	1.8e-12	proteasome subunit beta type-2-A [Brassica oleracea var. oleracea]
LOC106321648	7.67	16.53	1.10779	1.41e-15	Up	1.08e-16	glutamate dehydrogenase 2-like [Brassica oleracea var. oleracea]
LOC106340257	34.86	75.12	1.10762	7.11e-63	Up	1.33e-64	uncharacterized acetyltransferase At3g50280 [Brassica oleracea var. oleracea]
LOC106315442	3.1	6.68	1.10758	3.18e-05	Up	6.57e-06	rac-like GTP-binding protein ARAC10 isoform X1 [Brassica oleracea var. oleracea]
LOC106337685	391.77	843.88	1.10703	5.89e-200	Up	3.11e-202	defensin-like protein 2 isoform X1 [Brassica oleracea var. oleracea]
LOC106332384	9.22	19.86	1.10703	4.74e-07	Up	7.55e-08	elicitor peptide 1-like [Brassica oleracea var. oleracea]
LOC106317621	9.87	21.25	1.10634	5.04e-13	Up	4.57e-14	vesicle-associated protein 2-1-like [Brassica oleracea var. oleracea]
LOC106312863	3.22	6.93	1.1058	1.07e-08	Up	1.41e-09	protein trichome birefringence-like 2 [Brassica oleracea var. oleracea]
LOC106306962	2.5	5.38	1.10568	2.37e-05	Up	4.81e-06	protein IQ-DOMAIN 31-like [Brassica oleracea var. oleracea]
LOC106342291	26.04	56.02	1.10521	5.67e-24	Up	2.79e-25	CDY13216.1|//BnaC04g26190D [Brassica napus]
LOC106327986	88.24	189.81	1.10505	5.83e-143	Up	4.53e-145	inactive GDSL esterase/lipase-like protein 25 [Brassica oleracea var. oleracea]
LOC106343696	1.79	3.85	1.1049	5.5e-05	Up	1.18e-05	LOW QUALITY PROTEIN: protein ASPARTIC PROTEASE IN GUARD CELL 2 [Brassica oleracea var. oleracea]
LOC106292545	1.46	3.14	1.1048	0.000546006	Up	0.000140717	uncharacterized protein LOC106292545 [Brassica oleracea var. oleracea]
LOC106293484	4.85	10.43	1.10468	3.18e-05	Up	6.57e-06	uncharacterized protein LOC106293484 [Brassica oleracea var. oleracea]
LOC106292229	7.11	15.29	1.10467	3.66e-07	Up	5.75e-08	germin-like protein subfamily 3 member 2 [Brassica oleracea var. oleracea]
LOC106311549	2.82	6.06	1.10362	1.85e-06	Up	3.18e-07	probable Xaa-Pro aminopeptidase 3 [Brassica oleracea var. oleracea]
LOC106292454	7.81	16.78	1.10335	4.88e-26	Up	2.21e-27	putative DNA (cytosine-5)-methyltransferase CMT1 [Brassica oleracea var. oleracea]
LOC106314343	5.05	10.85	1.10334	2e-11	Up	2.06e-12	gamma-aminobutyrate transaminase POP2, mitochondrial-like [Brassica oleracea var. oleracea]
LOC106337345	2.1	4.51	1.10274	2.82e-06	Up	4.96e-07	CDT1-like protein a, chloroplastic [Brassica oleracea var. oleracea]
LOC106318573	2.1	4.51	1.10274	2.8e-05	Up	5.72e-06	pyruvate kinase, cytosolic isozyme [Brassica oleracea var. oleracea]
LOC106311146	6.25	13.42	1.10246	6.35e-08	Up	9.12e-09	uncharacterized protein LOC106311146 [Brassica oleracea var. oleracea]
LOC106339156	5.44	11.68	1.10236	2.23e-13	Up	1.97e-14	pentatricopeptide repeat-containing protein At3g02650, mitochondrial [Brassica oleracea var. oleracea]
LOC106337277	3.47	7.45	1.10231	0.000480122	Up	0.000122224	protein FAM136A [Brassica oleracea var. oleracea]
LOC106334682	5.92	12.71	1.1023	4.92e-22	Up	2.63e-23	uncharacterized protein LOC106334682 [Brassica oleracea var. oleracea]
LOC106312218	5.69	12.21	1.10156	1.74e-12	Up	1.64e-13	MATE efflux family protein 7-like [Brassica oleracea var. oleracea]
LOC106319985	0.96	2.06	1.10154	0.000164894	Up	3.85e-05	uncharacterized protein LOC106319985 [Brassica oleracea var. oleracea]
LOC106293394	10.5	22.53	1.10146	1.43e-07	Up	2.14e-08	uncharacterized protein LOC103870191 [Brassica rapa]
LOC106309762	28.77	61.71	1.10094	4.36e-30	Up	1.71e-31	proline-rich antigen homolog [Brassica napus]
LOC106336181	4.57	9.8	1.10059	1.56e-13	Up	1.36e-14	UPF0503 protein At3g09070, chloroplastic-like [Brassica oleracea var. oleracea]
LOC106328494	1.34	2.87	1.09882	0.000807656	Up	0.000214468	type I inositol polyphosphate 5-phosphatase 10 [Brassica oleracea var. oleracea]
LOC106297934	9.79	20.96	1.09826	1.07e-20	Up	6.05e-22	CBL-interacting serine/threonine-protein kinase 8 [Brassica oleracea var. oleracea]
LOC106335611	3.86	8.26	1.09754	3.21e-07	Up	5.01e-08	caffeoylshikimate esterase-like [Brassica oleracea var. oleracea]
LOC106322077	11.77	25.17	1.09659	1.25e-09	Up	1.5e-10	AB hydrolase superfamily protein YfhM-like [Brassica oleracea var. oleracea]
LOC106308279	3.98	8.51	1.09639	2.17e-09	Up	2.67e-10	uncharacterized protein LOC106308279 isoform X2 [Brassica oleracea var. oleracea]
LOC106344020	25.31	54.11	1.09619	6.82e-34	Up	2.43e-35	superoxide dismutase [Cu-Zn] 1 [Brassica oleracea var. oleracea]
LOC106294840	12.9	27.57	1.09573	1.19e-36	Up	3.94e-38	nucleolar GTP-binding protein 1 [Brassica oleracea var. oleracea]
LOC106335868	13.14	28.08	1.09558	1.26e-43	Up	3.51e-45	ribonucleoside-diphosphate reductase large subunit-like [Brassica oleracea var. oleracea]
LOC106322867	3.87	8.27	1.09555	1.79e-09	Up	2.18e-10	SNF1-related protein kinase catalytic subunit alpha KIN11-like [Brassica oleracea var. oleracea]
LOC106339793	5.05	10.79	1.09534	4.24e-05	Up	8.95e-06	DNA-directed RNA polymerases II, IV and V subunit 6A [Brassica oleracea var. oleracea]
LOC106331665	5.19	11.08	1.09415	9.68e-08	Up	1.42e-08	uncharacterized protein LOC106331665 isoform X1 [Brassica oleracea var. oleracea]
LOC106300054	1.71	3.65	1.0939	1.67e-06	Up	2.86e-07	protein PAT1 homolog 1 [Brassica oleracea var. oleracea]
LOC106342656	3.59	7.66	1.09336	6.12e-13	Up	5.59e-14	filament-like plant protein 7 [Brassica oleracea var. oleracea]
LOC106314419	2.02	4.31	1.09333	0.000140517	Up	3.24e-05	spindle pole body component 110-like [Brassica oleracea var. oleracea]
LOC106344043	3.07	6.55	1.09326	6.56e-05	Up	1.43e-05	uncharacterized protein LOC106344043 isoform X3 [Brassica oleracea var. oleracea]
LOC106294461	5.11	10.9	1.09293	1.24e-10	Up	1.36e-11	alpha/beta hydrolase domain-containing protein 17B-like isoform X1 [Brassica oleracea var. oleracea]
LOC106321195	4.11	8.76	1.09179	1.92e-08	Up	2.59e-09	eukaryotic initiation factor 4A-3 isoform X1 [Brassica oleracea var. oleracea]
LOC106337365	10.36	22.08	1.09172	1.98e-16	Up	1.44e-17	zinc-finger homeodomain protein 10 isoform X1 [Brassica oleracea var. oleracea]
LOC106318270	2.44	5.2	1.09163	0.000833003	Up	0.000221904	CDX87197.1|//BnaC09g05120D [Brassica napus]
LOC106312933	3.59	7.65	1.09148	4.72e-10	Up	5.45e-11	protein IQ-DOMAIN 31-like [Brassica napus]
LOC106334541	5.73	12.21	1.09146	2.06e-12	Up	1.94e-13	histone acetyltransferase type B catalytic subunit [Brassica oleracea var. oleracea]
LOC106294688	3.14	6.69	1.09124	9.22e-05	Up	2.06e-05	uncharacterized protein LOC106294688 [Brassica oleracea var. oleracea]
LOC106342831	6.3	13.42	1.09096	8.33e-12	Up	8.25e-13	shugoshin-1 isoform X1 [Brassica oleracea var. oleracea]
LOC106300118	4.92	10.48	1.09091	9.52e-05	Up	2.13e-05	multiprotein-bridging factor 1b-like [Brassica oleracea var. oleracea]
LOC106308071	50.84	108.28	1.09073	3.83e-60	Up	7.48e-62	2-oxoglutarate-dependent dioxygenase DAO-like [Brassica oleracea var. oleracea]
LOC106309539	5.82	12.39	1.09008	1.13e-07	Up	1.67e-08	protein IQ-DOMAIN 14 [Brassica oleracea var. oleracea]
LOC106324775	3.19	6.79	1.08986	2.9e-06	Up	5.11e-07	histone-binding protein MSI1-like [Brassica oleracea var. oleracea]
LOC106312202	4.13	8.79	1.08972	2.63e-13	Up	2.33e-14	monosaccharide-sensing protein 1 [Brassica oleracea var. oleracea]
LOC106296027	10.52	22.38	1.08908	7.46e-19	Up	4.69e-20	uncharacterized protein LOC106296027 [Brassica oleracea var. oleracea]
LOC106320938	20.53	43.61	1.08692	2.52e-49	Up	6.26e-51	auxin response factor 18-like [Brassica oleracea var. oleracea]
LOC106334418	2.2	4.67	1.08592	0.00028531	Up	6.95e-05	INO80 complex subunit D [Brassica oleracea var. oleracea]
LOC106295909	2.45	5.2	1.08573	5.71e-10	Up	6.63e-11	proline-rich receptor-like protein kinase PERK10 [Brassica oleracea var. oleracea]
LOC106309611	99.53	211.24	1.08568	4.35e-136	Up	3.56e-138	putative lactoylglutathione lyase [Brassica oleracea var. oleracea]
LOC106315905	7.6	16.13	1.08567	1.85e-06	Up	3.18e-07	mitochondrial import receptor subunit TOM9-2-like [Brassica oleracea var. oleracea]
LOC106296398	2.57	5.45	1.08449	1.67e-07	Up	2.53e-08	auxin efflux carrier component 1-like [Brassica oleracea var. oleracea]
LOC106321625	1.99	4.22	1.08448	2.15e-05	Up	4.33e-06	MLO-like protein 1 [Brassica napus]
LOC106298492	3.11	6.59	1.08336	0.000480067	Up	0.000122224	PLASMODESMATA CALLOSE-BINDING PROTEIN 5 [Brassica oleracea var. oleracea]
LOC106333254	12.69	26.86	1.08177	2.08e-15	Up	1.61e-16	alpha carbonic anhydrase 2-like [Brassica oleracea var. oleracea]
LOC106318565	2.77	5.86	1.08102	9.68e-08	Up	1.42e-08	uncharacterized protein YqeH [Brassica oleracea var. oleracea]
LOC106308593	12.39	26.21	1.08094	8.08e-25	Up	3.83e-26	squalene synthase [Brassica oleracea var. oleracea]
LOC106317880	112.7	238.36	1.08065	2.21e-117	Up	2.1e-119	unknwn protein
LOC106343097	3.48	7.36	1.08062	4.89e-07	Up	7.81e-08	uncharacterized protein LOC106343097 [Brassica oleracea var. oleracea]
LOC106327853	2.79	5.9	1.08045	9.62e-06	Up	1.83e-06	probable protein phosphatase 2C 71 [Brassica oleracea var. oleracea]
LOC106303671	5.38	11.37	1.07955	4.41e-07	Up	7e-08	methylesterase 10 [Brassica oleracea var. oleracea]
LOC106296722	11.49	24.28	1.07939	1.19e-17	Up	8.01e-19	actin-related protein 7 [Brassica oleracea var. oleracea]
LOC106315957	5.13	10.84	1.07933	9.95e-08	Up	1.46e-08	MATH domain and coiled-coil domain-containing protein At3g58210-like [Brassica oleracea var. oleracea]
LOC106313632	2.93	6.19	1.07904	4.4e-06	Up	7.96e-07	phosphatidylinositol N-acetylglucosaminyltransferase gpi3 subunit [Brassica oleracea var. oleracea]
LOC106340122	311.9	658.78	1.07871	1.22e-194	Up	6.64e-197	defensin-like protein 2 [Brassica oleracea var. oleracea]
LOC106309650	2.95	6.23	1.07852	1.72e-07	Up	2.6e-08	protein downstream neighbor of Son-like [Brassica oleracea var. oleracea]
LOC106341832	6.01	12.69	1.07825	7.67e-09	Up	9.92e-10	uncharacterized protein LOC106341832 [Brassica oleracea var. oleracea]
LOC106339460	3.59	7.58	1.07821	5.56e-06	Up	1.02e-06	WD repeat-containing protein 55 [Brassica oleracea var. oleracea]
LOC106318422	5.03	10.62	1.07815	1.37e-18	Up	8.74e-20	calmodulin-binding transcription activator 1 isoform X1 [Brassica oleracea var. oleracea]
LOC106306132	6.04	12.75	1.07788	2.05e-19	Up	1.25e-20	putative rRNA methyltransferase [Brassica oleracea var. oleracea]
LOC106308421	220.81	465.73	1.07669	0	Up	0	peroxidase 42 [Brassica rapa]
LOC106300801	1.38	2.91	1.07635	3.82e-05	Up	7.99e-06	pentatricopeptide repeat-containing protein At1g79490, mitochondrial [Brassica oleracea var. oleracea]
LOC106335498	4.64	9.78	1.07571	8.85e-20	Up	5.27e-21	auxin response factor 6-like isoform X2 [Brassica oleracea var. oleracea]
LOC106336373	0.93	1.96	1.07555	4.95e-05	Up	1.06e-05	BRCT domain-containing protein At4g02110 [Brassica oleracea var. oleracea]
LOC106317191	1.86	3.92	1.07555	2.58e-05	Up	5.24e-06	dynamin-related protein 4C-like [Brassica oleracea var. oleracea]
LOC106327034	20.26	42.69	1.07526	2.53e-37	Up	8.24e-39	UDP-glycosyltransferase 78D2-like [Brassica oleracea var. oleracea]
LOC106317174	22.35	47.07	1.07453	1.8e-49	Up	4.44e-51	pectinesterase/pectinesterase inhibitor 3-like isoform X2 [Brassica oleracea var. oleracea]
LOC106298673	5.43	11.43	1.0738	1.51e-06	Up	2.56e-07	exosome complex component CSL4 [Brassica oleracea var. oleracea]
LOC106307523	1.81	3.81	1.0738	9.76e-05	Up	2.19e-05	ankyrin repeat and zinc finger domain-containing protein 1 [Brassica oleracea var. oleracea]
LOC106342431	6.34	13.34	1.0732	1.93e-24	Up	9.28e-26	auxin response factor 8 isoform X2 [Brassica oleracea var. oleracea]
LOC106315902	29.57	62.2	1.07278	2.93e-29	Up	1.18e-30	protein TIFY 3B-like [Brassica oleracea var. oleracea]
LOC106303408	2.81	5.91	1.07259	3.46e-10	Up	3.94e-11	histone-lysine N-methyltransferase ATX4 [Brassica oleracea var. oleracea]
LOC106335596	27.98	58.84	1.0724	1.22e-45	Up	3.25e-47	thaumatin-like protein 1b [Brassica oleracea var. oleracea]
LOC106319706	568.69	1195.1	1.07142	0	Up	0	uncharacterized protein At5g39570 [Brassica oleracea var. oleracea]
LOC106327399	4.78	10.04	1.07068	8.77e-14	Up	7.51e-15	glutamate--tRNA ligase, cytoplasmic [Brassica oleracea var. oleracea]
LOC106331525	90.95	191.01	1.0705	6.19e-61	Up	1.19e-62	Histone core [Cynara cardunculus var. scolymus]
LOC106295342	12.36	25.95	1.07006	1.43e-18	Up	9.18e-20	F-box protein 7 [Brassica oleracea var. oleracea]
LOC106295090	2.72	5.71	1.06988	0.000187803	Up	4.43e-05	CDY27569.1|//BnaC01g32520D [Brassica napus]
LOC106337829	4.44	9.32	1.06977	3.76e-06	Up	6.74e-07	cathepsin B-like [Brassica oleracea var. oleracea]
LOC106321319	1.83	3.84	1.06926	3.82e-05	Up	7.99e-06	multicopper oxidase LPR1 [Brassica oleracea var. oleracea]
LOC106343828	17.89	37.53	1.06889	2.25e-24	Up	1.09e-25	2-oxoglutarate-dependent dioxygenase DAO-like [Brassica oleracea var. oleracea]
LOC106301662	11.2	23.49	1.06855	3.6e-21	Up	2e-22	AP2-like ethylene-responsive transcription factor TOE3 [Brassica oleracea var. oleracea]
LOC106318253	16.69	35	1.06837	2.99e-12	Up	2.86e-13	probable histone H2A.2 [Brassica oleracea var. oleracea]
LOC106319097	1.55	3.25	1.06817	1.98e-05	Up	3.95e-06	auxin response factor 4 isoform X1 [Brassica oleracea var. oleracea]
LOC106295799	6.74	14.13	1.06794	2.67e-09	Up	3.3e-10	14-3-3-like protein GF14 phi [Brassica oleracea var. oleracea]
LOC106302082	3.85	8.07	1.06771	3.56e-06	Up	6.36e-07	protein XRI1 isoform X1 [Brassica oleracea var. oleracea]
LOC106292635	8.08	16.93	1.06716	2.99e-12	Up	2.86e-13	BCAT4 [Brassicaoleracea var. alboglabra]
LOC106295676	4.85	10.16	1.06684	0.000492171	Up	0.000125564	ubiquitin-40S ribosomal protein S27a-1 [Brassica oleracea var. oleracea]
LOC106301747	45.88	96.11	1.06682	9.93e-97	Up	1.16e-98	membrane protein of ER body 2 isoform X1 [Brassica oleracea var. oleracea]
LOC106303713	22.25	46.6	1.06652	3.21e-20	Up	1.88e-21	uncharacterized protein At5g48480 [Brassica oleracea var. oleracea]
LOC106294670	3.18	6.66	1.06649	3.91e-13	Up	3.52e-14	importin beta-like SAD2 homolog isoform X2 [Brassica oleracea var. oleracea]
LOC106342220	2.03	4.25	1.06598	3.53e-10	Up	4.02e-11	ABC transporter B family member 1 [Brassica oleracea var. oleracea]
LOC106309962	38.32	80.17	1.06496	1.32e-24	Up	6.33e-26	uncharacterized protein LOC100261486 [Vitis vinifera]
LOC106296930	2.72	5.69	1.06482	3.39e-06	Up	6.02e-07	WD repeat-containing protein 76 [Brassica oleracea var. oleracea]
LOC106321903	2.53	5.29	1.06413	2.58e-05	Up	5.24e-06	probable receptor-like protein kinase At5g20050 [Brassica oleracea var. oleracea]
LOC106334954	7.57	15.82	1.06338	1.92e-19	Up	1.17e-20	protein CYPRO4-like [Brassica oleracea var. oleracea]
LOC106318217	5.03	10.51	1.06313	1.17e-11	Up	1.17e-12	AT-hook motif nuclear-localized protein 4-like [Brassica oleracea var. oleracea]
LOC106306984	5.37	11.22	1.06308	6.5e-10	Up	7.59e-11	ABSCISIC ACID-INSENSITIVE 5-like protein 6 isoform X1 [Brassica oleracea var. oleracea]
LOC106293102	0.56	1.17	1.06301	0.000492114	Up	0.000125564	disease resistance protein TAO1-like [Brassica oleracea var. oleracea]
LOC106304110	4.71	9.84	1.06293	0.000370621	Up	9.22e-05	CDY11012.1|//BnaA03g46710D [Brassica napus]
LOC106333855	19.88	41.53	1.06284	1.05e-39	Up	3.22e-41	UDP-glucosyl transferase 73B2-like isoform X2 [Brassica napus]
LOC106295459	29.46	61.54	1.06277	4.9e-21	Up	2.75e-22	probable histone H2AXa [Brassica napus]
LOC106328320	7.44	15.54	1.06261	3.39e-06	Up	6.02e-07	uncharacterized protein LOC106328320 [Brassica oleracea var. oleracea]
LOC106329554	4.53	9.46	1.06233	7.63e-07	Up	1.25e-07	tetratricopeptide repeat protein 7B-like [Brassica napus]
LOC106312784	34.86	72.77	1.06177	6.26e-55	Up	1.38e-56	UDP-D-apiose/UDP-D-xylose synthase 2 [Brassica oleracea var. oleracea]
LOC106343636	4.58	9.56	1.06166	1.54e-07	Up	2.31e-08	U-box domain-containing protein 4-like [Brassica oleracea var. oleracea]
LOC106322728	2.18	4.55	1.06154	4.5e-06	Up	8.13e-07	probable 28S rRNA (cytosine(4447)-C(5))-methyltransferase [Brassica oleracea var. oleracea]
LOC106343908	8.05	16.8	1.0614	6.89e-14	Up	5.84e-15	uncharacterized protein LOC106343908 [Brassica oleracea var. oleracea]
[truncated: 1,287 more rows]
