# Supplementary material for: BolTLP1, a Thaumatin-like Protein Gene, Confers Tolerance to Salt and Drought Stresses in Broccoli (Brassica oleracea L. var. Italica)
Source: Int J Mol Sci. 2021 Oct 15;22(20):11132. doi: 10.3390/ijms222011132 (PMC8537552; doi:10.3390/ijms222011132)
Supplement: Supplementary file 1 [file ijms-22-11132-s001.zip › Supplementary files/Supplementary Table S2.xlsx]

## Sheet: Sheet1
Supplementary Table S2 GO functional annotation of the differentially expressed genes detected between the 35S::bolTLP1 broccoli and the vector controls.
Gene Ontology		GO term	Corrected P-value	Significance level
Biological process	GO:0006950	response to stress	5.81e-10	**
	GO:0016143	S-glycoside metabolic process	2.36e-09	**
	GO:0019757	glycosinolate metabolic process	2.36e-09	**
	GO:0006790	sulfur compound metabolic process	3.37e-08	**
	GO:0006259	DNA metabolic process	1.96e-07	**
	GO:0050896	response to stimulus	3.34e-07	**
	GO:0010466	negative regulation of peptidase activity	6.33e-06	**
	GO:0030162	regulation of proteolysis	6.33e-06	**
	GO:0045861	negative regulation of proteolysis	6.33e-06	**
	GO:0052547	regulation of peptidase activity	6.33e-06	**
	GO:1901657	glycosyl compound metabolic process	7.91e-06	**
	GO:0044273	sulfur compound catabolic process	1.06e-05	**
	GO:0019748	secondary metabolic process	1.33e-05	**
	GO:1901658	glycosyl compound catabolic process	4.52e-05	**
	GO:0044710	single-organism metabolic process	4.71e-05	**
	GO:0016145	S-glycoside catabolic process	5.57e-05	**
	GO:0019759	glycosinolate catabolic process	5.57e-05	**
	GO:1901135	carbohydrate derivative metabolic process	9.12e-05	**
	GO:0034728	nucleosome organization	0.00019	**
	GO:0071824	protein-DNA complex subunit organization	0.00019	**
	GO:0044699	single-organism process	0.00062	**
	GO:0043086	negative regulation of catalytic activity	0.00108	**
	GO:0051346	negative regulation of hydrolase activity	0.00108	**
	GO:0031324	negative regulation of cellular metabolic process	0.00124	**
	GO:1901136	carbohydrate derivative catabolic process	0.00148	**
	GO:0006952	defense response	0.00166	**
	GO:0006325	chromatin organization	0.00261	**
	GO:0009628	response to abiotic stimulus	0.00298	**
	GO:0016144	S-glycoside biosynthetic process	0.00357	**
	GO:0019758	glycosinolate biosynthetic process	0.00357	**
	GO:0044281	small molecule metabolic process	0.00358	**
	GO:0006970	response to osmotic stress	0.00576	**
	GO:0051336	regulation of hydrolase activity	0.0091	**
	GO:0044763	single-organism cellular process	0.01045	*
	GO:0007063	regulation of sister chromatid cohesion	0.01101	*
	GO:0051304	chromosome separation	0.01101	*
	GO:0032269	negative regulation of cellular protein metabolic process	0.02386	*
	GO:0051248	negative regulation of protein metabolic process	0.02386	*
	GO:0044272	sulfur compound biosynthetic process	0.03722	*
	GO:0050790	regulation of catalytic activity	0.05934
	GO:0009404	toxin metabolic process	0.06515
	GO:0006807	nitrogen compound metabolic process	0.06917
	GO:0010605	negative regulation of macromolecule metabolic process	0.07074
	GO:0006261	DNA-dependent DNA replication	0.12164
	GO:0006260	DNA replication	0.13035
	GO:0042430	indole-containing compound metabolic process	0.14163
	GO:0043436	oxoacid metabolic process	0.16844
	GO:0006082	organic acid metabolic process	0.17468
	GO:0009892	negative regulation of metabolic process	0.19697
	GO:1901565	organonitrogen compound catabolic process	0.22584
	GO:0042214	terpene metabolic process	0.23091
	GO:0006342	chromatin silencing	0.25578
	GO:0045814	negative regulation of gene expression, epigenetic	0.25578
	GO:0006568	tryptophan metabolic process	0.29444
	GO:0009072	aromatic amino acid family metabolic process	0.30886
	GO:0009683	indoleacetic acid metabolic process	0.35638
	GO:0006586	indolalkylamine metabolic process	0.38904
	GO:0044550	secondary metabolite biosynthetic process	0.39381
	GO:0044723	single-organism carbohydrate metabolic process	0.39683
	GO:0005975	carbohydrate metabolic process	0.43078
	GO:0033044	regulation of chromosome organization	0.45587
	GO:0033045	regulation of sister chromatid segregation	0.45587
	GO:0051983	regulation of chromosome segregation	0.45587
	GO:0007059	chromosome segregation	0.46409
	GO:0007276	gamete generation	0.48137
	GO:0045892	negative regulation of transcription, DNA-templated	0.52436
	GO:0045934	negative regulation of nucleobase-containing compound metabolic process	0.52436
	GO:0051253	negative regulation of RNA metabolic process	0.52436
	GO:1902679	negative regulation of RNA biosynthetic process	0.52436
	GO:1903507	negative regulation of nucleic acid-templated transcription	0.52436
	GO:0005976	polysaccharide metabolic process	0.62541
	GO:0044711	single-organism biosynthetic process	0.68908
	GO:0009850	auxin metabolic process	0.71695
	GO:0009225	nucleotide-sugar metabolic process	0.72562
	GO:0009403	toxin biosynthetic process	0.73783
	GO:0009700	indole phytoalexin biosynthetic process	0.73783
	GO:0046217	indole phytoalexin metabolic process	0.73783
	GO:0052314	phytoalexin metabolic process	0.73783
	GO:0052315	phytoalexin biosynthetic process	0.73783
	GO:1901605	alpha-amino acid metabolic process	0.74688
	GO:0006725	cellular aromatic compound metabolic process	0.77585
	GO:0044262	cellular carbohydrate metabolic process	0.80952
	GO:0048511	rhythmic process	0.85552
	GO:0032268	regulation of cellular protein metabolic process	0.86311
	GO:0051246	regulation of protein metabolic process	0.86311
	GO:1901360	organic cyclic compound metabolic process	0.91581
	GO:1901137	carbohydrate derivative biosynthetic process	1
	GO:0048523	negative regulation of cellular process	1
	GO:0043933	macromolecular complex subunit organization	1
	GO:0046483	heterocycle metabolic process	1
	GO:0051726	regulation of cell cycle	1
	GO:0009607	response to biotic stimulus	1
	GO:0010675	regulation of cellular carbohydrate metabolic process	1
	GO:1901659	glycosyl compound biosynthetic process	1
	GO:0043692	monoterpene metabolic process	1
	GO:0044264	cellular polysaccharide metabolic process	1
	GO:0042221	response to chemical	1
	GO:0005982	starch metabolic process	1
	GO:0006520	cellular amino acid metabolic process	1
	GO:0044042	glucan metabolic process	1
	GO:0009719	response to endogenous stimulus	1
	GO:0009226	nucleotide-sugar biosynthetic process	1
	GO:0006139	nucleobase-containing compound metabolic process	1
	GO:0044092	negative regulation of molecular function	1
	GO:0006720	isoprenoid metabolic process	1
	GO:0007049	cell cycle	1
	GO:0042435	indole-containing compound biosynthetic process	1
	GO:0051052	regulation of DNA metabolic process	1
	GO:0010817	regulation of hormone levels	1
	GO:0080090	regulation of primary metabolic process	1
	GO:0006714	sesquiterpenoid metabolic process	1
	GO:0052482	defense response by cell wall thickening	1
	GO:0051704	multi-organism process	1
	GO:0042545	cell wall modification	1
	GO:0002239	response to oomycetes	1
	GO:0006914	autophagy	1
	GO:0034637	cellular carbohydrate biosynthetic process	1
	GO:0009790	embryo development	1
	GO:0006974	cellular response to DNA damage stimulus	1
	GO:0051128	regulation of cellular component organization	1
	GO:0006721	terpenoid metabolic process	1
	GO:0010103	stomatal complex morphogenesis	1
	GO:0010520	regulation of reciprocal meiotic recombination	1
	GO:0010528	regulation of transposition	1
	GO:0010604	positive regulation of macromolecule metabolic process	1
	GO:0031057	negative regulation of histone modification	1
	GO:0031058	positive regulation of histone modification	1
	GO:0031062	positive regulation of histone methylation	1
	GO:0031401	positive regulation of protein modification process	1
	GO:0032196	transposition	1
	GO:0032270	positive regulation of cellular protein metabolic process	1
	GO:0035065	regulation of histone acetylation	1
	GO:0035067	negative regulation of histone acetylation	1
	GO:0051247	positive regulation of protein metabolic process	1
	GO:0060631	regulation of meiosis I	1
	GO:1901983	regulation of protein acetylation	1
	GO:1901984	negative regulation of protein acetylation	1
	GO:1905268	negative regulation of chromatin organization	1
	GO:1905269	positive regulation of chromatin organization	1
	GO:2000756	regulation of peptidyl-lysine acetylation	1
	GO:2000757	negative regulation of peptidyl-lysine acetylation	1
	GO:0016051	carbohydrate biosynthetic process	1
	GO:0048367	shoot system development	1
	GO:0018195	peptidyl-arginine modification	1
	GO:0018216	peptidyl-arginine methylation	1
	GO:0052386	cell wall thickening	1
	GO:0043207	response to external biotic stimulus	1
	GO:0051707	response to other organism	1
	GO:0034641	cellular nitrogen compound metabolic process	1
	GO:0033692	cellular polysaccharide biosynthetic process	1
	GO:0048519	negative regulation of biological process	1
	GO:0006730	one-carbon metabolic process	1
	GO:0009743	response to carbohydrate	1
	GO:0006073	cellular glucan metabolic process	1
	GO:0006281	DNA repair	1
	GO:0019222	regulation of metabolic process	1
	GO:0019953	sexual reproduction	1
	GO:0006109	regulation of carbohydrate metabolic process	1
	GO:0033043	regulation of organelle organization	1
	GO:0006563	L-serine metabolic process	1
	GO:0009605	response to external stimulus	1
	GO:0006338	chromatin remodeling	1
	GO:1901564	organonitrogen compound metabolic process	1
	GO:0010558	negative regulation of macromolecule biosynthetic process	1
	GO:0031327	negative regulation of cellular biosynthetic process	1
	GO:0051172	negative regulation of nitrogen compound metabolic process	1
	GO:2000113	negative regulation of cellular macromolecule biosynthetic process	1
	GO:0031323	regulation of cellular metabolic process	1
	GO:0044702	single organism reproductive process	1
	GO:0009311	oligosaccharide metabolic process	1
	GO:0010564	regulation of cell cycle process	1
	GO:0000271	polysaccharide biosynthetic process	1
	GO:0009755	hormone-mediated signaling pathway	1
	GO:0006791	sulfur utilization	1
	GO:0009166	nucleotide catabolic process	1
	GO:0015959	diadenosine polyphosphate metabolic process	1
	GO:0015961	diadenosine polyphosphate catabolic process	1
	GO:0031056	regulation of histone modification	1
	GO:0031060	regulation of histone methylation	1
	GO:0034755	iron ion transmembrane transport	1
	GO:0090626	plant epidermis morphogenesis	1
	GO:1902275	regulation of chromatin organization	1
	GO:0006979	response to oxidative stress	1
	GO:0048827	phyllome development	1
	GO:0006310	DNA recombination	1
	GO:0032870	cellular response to hormone stimulus	1
	GO:0090304	nucleic acid metabolic process	1
	GO:0071495	cellular response to endogenous stimulus	1
	GO:0009875	pollen-pistil interaction	1
	GO:0016098	monoterpenoid metabolic process	1
	GO:0032392	DNA geometric change	1
	GO:0032776	DNA methylation on cytosine	1
	GO:1901700	response to oxygen-containing compound	1
	GO:0005984	disaccharide metabolic process	1
	GO:0019760	glucosinolate metabolic process	1
	GO:0019752	carboxylic acid metabolic process	1
	GO:0071310	cellular response to organic substance	1
	GO:0010033	response to organic substance	1
	GO:0042445	hormone metabolic process	1
	GO:0010035	response to inorganic substance	1
	GO:0009890	negative regulation of biosynthetic process	1
	GO:0022402	cell cycle process	1
	GO:0050794	regulation of cellular process	1
	GO:0071554	cell wall organization or biogenesis	1
	GO:0006541	glutamine metabolic process	1
	GO:0016458	gene silencing	1
	GO:0006306	DNA methylation	1
	GO:0044728	DNA methylation or demethylation	1
	GO:0071103	DNA conformation change	1
	GO:0001708	cell fate specification	1
	GO:0048366	leaf development	1
	GO:0006266	DNA ligation	1
	GO:0006971	hypotonic response	1
	GO:0031400	negative regulation of protein modification process	1
	GO:0040020	regulation of meiotic nuclear division	1
	GO:0046246	terpene biosynthetic process	1
	GO:0051445	regulation of meiotic cell cycle	1
	GO:0051276	chromosome organization	1
	GO:0040029	regulation of gene expression, epigenetic	1
	GO:0065009	regulation of molecular function	1
	GO:0002831	regulation of response to biotic stimulus	1
	GO:0071555	cell wall organization	1
	GO:0009639	response to red or far red light	1
	GO:0044712	single-organism catabolic process	1
	GO:0006144	purine nucleobase metabolic process	1
	GO:0009820	alkaloid metabolic process	1
	GO:0009965	leaf morphogenesis	1
	GO:0033554	cellular response to stress	1
	GO:0006558	L-phenylalanine metabolic process	1
	GO:1902221	erythrose 4-phosphate/phosphoenolpyruvate family amino acid metabolic process	1
	GO:0009888	tissue development	1
	GO:0009813	flavonoid biosynthetic process	1
	GO:0060918	auxin transport	1
	GO:0000578	embryonic axis specification	1
	GO:0016101	diterpenoid metabolic process	1
	GO:0016043	cellular component organization	1
	GO:0006576	cellular biogenic amine metabolic process	1
	GO:0009793	embryo development ending in seed dormancy	1
	GO:0044106	cellular amine metabolic process	1
	GO:0044237	cellular metabolic process	1
	GO:0008037	cell recognition	1
	GO:0009914	hormone transport	1
	GO:0006498	N-terminal protein lipidation	1
	GO:0006805	xenobiotic metabolic process	1
	GO:0009410	response to xenobiotic stimulus	1
	GO:0031365	N-terminal protein amino acid modification	1
	GO:0031407	oxylipin metabolic process	1
	GO:0034969	histone arginine methylation	1
	GO:0045927	positive regulation of growth	1
	GO:0051181	cofactor transport	1
	GO:0071466	cellular response to xenobiotic stimulus	1
	GO:0070887	cellular response to chemical stimulus	1
	GO:0048507	meristem development	1
	GO:0009250	glucan biosynthetic process	1
	GO:0005977	glycogen metabolic process	1
	GO:0006112	energy reserve metabolic process	1
	GO:0006972	hyperosmotic response	1
	GO:2000241	regulation of reproductive process	1
	GO:0015851	nucleobase transport	1
	GO:0006305	DNA alkylation	1
	GO:0048229	gametophyte development	1
	GO:0032504	multicellular organism reproduction	1
	GO:0048609	multicellular organismal reproductive process	1
	GO:0060255	regulation of macromolecule metabolic process	1
	GO:0050789	regulation of biological process	1
	GO:0009636	response to toxic substance	1
	GO:0009756	carbohydrate mediated signaling	1
	GO:0071322	cellular response to carbohydrate stimulus	1
	GO:0010260	animal organ senescence	1
	GO:0010016	shoot system morphogenesis	1
	GO:0034754	cellular hormone metabolic process	1
	GO:0044764	multi-organism cellular process	1
	GO:0008283	cell proliferation	1
	GO:0010629	negative regulation of gene expression	1
	GO:0006304	DNA modification	1
	GO:0009292	genetic transfer	1
	GO:0009812	flavonoid metabolic process	1
	GO:0007067	mitotic nuclear division	1
	GO:0046148	pigment biosynthetic process	1
	GO:0005985	sucrose metabolic process	1
	GO:0006826	iron ion transport	1
	GO:0009987	cellular process	1
	GO:0002252	immune effector process	1
	GO:0045165	cell fate commitment	1
	GO:0006606	protein import into nucleus	1
	GO:0006772	thiamine metabolic process	1
	GO:0009880	embryonic pattern specification	1
	GO:0034504	protein localization to nucleus	1
	GO:0044744	protein targeting to nucleus	1
	GO:0051170	nuclear import	1
	GO:1902593	single-organism nuclear import	1
	GO:0043414	macromolecule methylation	1
	GO:0010038	response to metal ion	1
	GO:0051716	cellular response to stimulus	1
	GO:0009627	systemic acquired resistance	1
	GO:1901576	organic substance biosynthetic process	1
	GO:0048608	reproductive structure development	1
	GO:0061458	reproductive system development	1
	GO:0007568	aging	1
	GO:0048731	system development	1
	GO:0005996	monosaccharide metabolic process	1
	GO:0006020	inositol metabolic process	1
	GO:0007349	cellularization	1
	GO:0010182	sugar mediated signaling pathway	1
	GO:0000018	regulation of DNA recombination	1
	GO:0000086	G2/M transition of mitotic cell cycle	1
	GO:0009312	oligosaccharide biosynthetic process	1
	GO:0009686	gibberellin biosynthetic process	1
	GO:0016102	diterpenoid biosynthetic process	1
	GO:0035246	peptidyl-arginine N-methylation	1
	GO:0035247	peptidyl-arginine omega-N-methylation	1
	GO:0044770	cell cycle phase transition	1
	GO:0044772	mitotic cell cycle phase transition	1
	GO:0044839	cell cycle G2/M phase transition	1
	GO:0009908	flower development	1
	GO:0000725	recombinational repair	1
	GO:0031399	regulation of protein modification process	1
	GO:0051552	flavone metabolic process	1
	GO:0051553	flavone biosynthetic process	1
	GO:0090567	reproductive shoot system development	1
	GO:0016567	protein ubiquitination	1
	GO:0000096	sulfur amino acid metabolic process	1
	GO:0032259	methylation	1
	GO:0071840	cellular component organization or biogenesis	1
	GO:0048588	developmental cell growth	1
	GO:0005991	trehalose metabolic process	1
	GO:0008299	isoprenoid biosynthetic process	1
	GO:0065007	biological regulation	1
	GO:0031668	cellular response to extracellular stimulus	1
	GO:0071496	cellular response to external stimulus	1
	GO:0042440	pigment metabolic process	1
	GO:0009991	response to extracellular stimulus	1
	GO:0048869	cellular developmental process	1
	GO:0055086	nucleobase-containing small molecule metabolic process	1
	GO:0009734	auxin-activated signaling pathway	1
	GO:0010243	response to organonitrogen compound	1
	GO:0042723	thiamine-containing compound metabolic process	1
	GO:0051783	regulation of nuclear division	1
	GO:0016053	organic acid biosynthetic process	1
	GO:0046394	carboxylic acid biosynthetic process	1
	GO:0016571	histone methylation	1
	GO:0019321	pentose metabolic process	1
	GO:0006915	apoptotic process	1
	GO:0009113	purine nucleobase biosynthetic process	1
	GO:0009799	specification of symmetry	1
	GO:0043096	purine nucleobase salvage	1
	GO:0010154	fruit development	1
	GO:0048316	seed development	1
	GO:0044283	small molecule biosynthetic process	1
	GO:0006479	protein methylation	1
	GO:0016052	carbohydrate catabolic process	1
	GO:0018193	peptidyl-amino acid modification	1
	GO:0000272	polysaccharide catabolic process	1
	GO:0019762	glucosinolate catabolic process	1
	GO:0044767	single-organism developmental process	1
	GO:0006793	phosphorus metabolic process	1
	GO:0031667	response to nutrient levels	1
	GO:0031669	cellular response to nutrient levels	1
	GO:0009058	biosynthetic process	1
	GO:0009798	axis specification	1
	GO:0019219	regulation of nucleobase-containing compound metabolic process	1
	GO:0009926	auxin polar transport	1
	GO:0006913	nucleocytoplasmic transport	1
	GO:0009718	anthocyanin-containing compound biosynthetic process	1
	GO:0009909	regulation of flower development	1
	GO:0019359	nicotinamide nucleotide biosynthetic process	1
	GO:0043392	negative regulation of DNA binding	1
	GO:0043900	regulation of multi-organism process	1
	GO:0046283	anthocyanin-containing compound metabolic process	1
	GO:0048831	regulation of shoot system development	1
	GO:0051101	regulation of DNA binding	1
	GO:0051129	negative regulation of cellular component organization	1
	GO:0051130	positive regulation of cellular component organization	1
	GO:0006007	glucose catabolic process	1
	GO:0051093	negative regulation of developmental process	1
	GO:0044238	primary metabolic process	1
	GO:0040008	regulation of growth	1
	GO:0015698	inorganic anion transport	1
	GO:0006801	superoxide metabolic process	1
	GO:0048580	regulation of post-embryonic development	1
	GO:0009685	gibberellin metabolic process	1
	GO:0009069	serine family amino acid metabolic process	1
	GO:0044255	cellular lipid metabolic process	1
	GO:0009064	glutamine family amino acid metabolic process	1
	GO:0016569	covalent chromatin modification	1
	GO:0019320	hexose catabolic process	1
	GO:0046365	monosaccharide catabolic process	1
	GO:0000097	sulfur amino acid biosynthetic process	1
	GO:0009933	meristem structural organization	1
	GO:0048532	anatomical structure arrangement	1
	GO:0006525	arginine metabolic process	1
	GO:0006560	proline metabolic process	1
	GO:0043101	purine-containing compound salvage	1
	GO:0046496	nicotinamide nucleotide metabolic process	1
	GO:0006497	protein lipidation	1
	GO:0009696	salicylic acid metabolic process	1
	GO:0018958	phenol-containing compound metabolic process	1
	GO:0042157	lipoprotein metabolic process	1
	GO:0042158	lipoprotein biosynthetic process	1
	GO:0042537	benzene-containing compound metabolic process	1
	GO:0009725	response to hormone	1
	GO:0032502	developmental process	1
	GO:0008652	cellular amino acid biosynthetic process	1
	GO:0010608	posttranscriptional regulation of gene expression	1
	GO:0015893	drug transport	1
	GO:0042493	response to drug	1
	GO:0019363	pyridine nucleotide biosynthetic process	1
	GO:1902582	single-organism intracellular transport	1
	GO:0008219	cell death	1
	GO:0008152	metabolic process	1
	GO:0007623	circadian rhythm	1
	GO:0019362	pyridine nucleotide metabolic process	1
	GO:0044249	cellular biosynthetic process	1
	GO:0042546	cell wall biogenesis	1
	GO:0009827	plant-type cell wall modification	1
	GO:0071365	cellular response to auxin stimulus	1
	GO:0048856	anatomical structure development	1
	GO:0000160	phosphorelay signal transduction system	1
	GO:0042254	ribosome biogenesis	1
	GO:0006997	nucleus organization	1
	GO:0006006	glucose metabolic process	1
	GO:0006629	lipid metabolic process	1
	GO:0019318	hexose metabolic process	1
	GO:0010374	stomatal complex development	1
	GO:0018022	peptidyl-lysine methylation	1
	GO:0034968	histone lysine methylation	1
	GO:0007005	mitochondrion organization	1
	GO:0015840	urea transport	1
	GO:0019761	glucosinolate biosynthetic process	1
	GO:0055067	monovalent inorganic cation homeostasis	1
	GO:0072525	pyridine-containing compound biosynthetic process	1
	GO:0000302	response to reactive oxygen species	1
	GO:0008213	protein alkylation	1
	GO:0048513	animal organ development	1
	GO:0019471	4-hydroxyproline metabolic process	1
	GO:0006796	phosphate-containing compound metabolic process	1
	GO:0019751	polyol metabolic process	1
	GO:0098542	defense response to other organism	1
	GO:0015837	amine transport	1
	GO:0009308	amine metabolic process	1
	GO:0044724	single-organism carbohydrate catabolic process	1
	GO:0007275	multicellular organism development	1
	GO:1903047	mitotic cell cycle process	1
	GO:0072593	reactive oxygen species metabolic process	1
	GO:1902580	single-organism cellular localization	1
	GO:0000087	mitotic M phase	1
	GO:0009063	cellular amino acid catabolic process	1
	GO:0007017	microtubule-based process	1
	GO:0009132	nucleoside diphosphate metabolic process	1
	GO:0017004	cytochrome complex assembly	1
	GO:0031325	positive regulation of cellular metabolic process	1
	GO:0043200	response to amino acid	1
	GO:0051100	negative regulation of binding	1
	GO:0016570	histone modification	1
	GO:0045229	external encapsulating structure organization	1
	GO:0051239	regulation of multicellular organismal process	1
	GO:0006633	fatty acid biosynthetic process	1
	GO:0048583	regulation of response to stimulus	1
	GO:0006403	RNA localization	1
	GO:0006405	RNA export from nucleus	1
	GO:0006547	histidine metabolic process	1
	GO:0010212	response to ionizing radiation	1
	GO:0050657	nucleic acid transport	1
	GO:0050658	RNA transport	1
	GO:0051168	nuclear export	1
	GO:0051236	establishment of RNA localization	1
	GO:0052803	imidazole-containing compound metabolic process	1
	GO:0098763	mitotic cell cycle phase	1
	GO:0009791	post-embryonic development	1
	GO:0006753	nucleoside phosphate metabolic process	1
	GO:0009112	nucleobase metabolic process	1
	GO:0019827	stem cell population maintenance	1
	GO:0098727	maintenance of cell number	1
	GO:0010051	xylem and phloem pattern formation	1
	GO:0044707	single-multicellular organism process	1
	GO:0048589	developmental growth	1
	GO:0051252	regulation of RNA metabolic process	1
	GO:0051171	regulation of nitrogen compound metabolic process	1
	GO:0046173	polyol biosynthetic process	1
	GO:0009913	epidermal cell differentiation	1
	GO:0030855	epithelial cell differentiation	1
	GO:0050832	defense response to fungus	1
	GO:0022403	cell cycle phase	1
	GO:0044848	biological phase	1
	GO:0000280	nuclear division	1
	GO:0034285	response to disaccharide	1
	GO:0009566	fertilization	1
	GO:0009943	adaxial/abaxial axis specification	1
	GO:0044282	small molecule catabolic process	1
	GO:0009414	response to water deprivation	1
	GO:1902589	single-organism organelle organization	1
	GO:0007154	cell communication	1
	GO:1901615	organic hydroxy compound metabolic process	1
	GO:0071704	organic substance metabolic process	1
	GO:0072524	pyridine-containing compound metabolic process	1
	GO:0019438	aromatic compound biosynthetic process	1
	GO:0010073	meristem maintenance	1
	GO:0009620	response to fungus	1
	GO:0019755	one-carbon compound transport	1
	GO:0048638	regulation of developmental growth	1
	GO:0051338	regulation of transferase activity	1
	GO:0000226	microtubule cytoskeleton organization	1
	GO:0006022	aminoglycan metabolic process	1
	GO:1901362	organic cyclic compound biosynthetic process	1
	GO:0032787	monocarboxylic acid metabolic process	1
	GO:0006355	regulation of transcription, DNA-templated	1
	GO:1903506	regulation of nucleic acid-templated transcription	1
	GO:2001141	regulation of RNA biosynthetic process	1
	GO:0018904	ether metabolic process	1
	GO:0006066	alcohol metabolic process	1
	GO:0000278	mitotic cell cycle	1
	GO:0009887	animal organ morphogenesis	1
	GO:0006468	protein phosphorylation	1
	GO:0099402	plant organ development	1
	GO:0009955	adaxial/abaxial pattern specification	1
	GO:0072594	establishment of protein localization to organelle	1
	GO:0009314	response to radiation	1
	GO:0000902	cell morphogenesis	1
	GO:0000279	M phase	1
	GO:0000003	reproduction	1
	GO:0009415	response to water	1
	GO:0060429	epithelium development	1
	GO:0006733	oxidoreduction coenzyme metabolic process	1
	GO:0001558	regulation of cell growth	1
	GO:0009893	positive regulation of metabolic process	1
	GO:0010065	primary meristem tissue development	1
	GO:0015977	carbon fixation	1
	GO:0048508	embryonic meristem development	1
	GO:0009664	plant-type cell wall organization	1
	GO:0016246	RNA interference	1
	GO:0019400	alditol metabolic process	1
	GO:0009267	cellular response to starvation	1
	GO:0042594	response to starvation	1
	GO:0072527	pyrimidine-containing compound metabolic process	1
	GO:2000026	regulation of multicellular organismal development	1
	GO:0016310	phosphorylation	1
	GO:0008610	lipid biosynthetic process	1
	GO:0034654	nucleobase-containing compound biosynthetic process	1
	GO:0017038	protein import	1
	GO:0042044	fluid transport	1
	GO:0022414	reproductive process	1
	GO:0018130	heterocycle biosynthetic process	1
	GO:0050793	regulation of developmental process	1
	GO:0051169	nuclear transport	1
	GO:0007165	signal transduction	1
	GO:0001932	regulation of protein phosphorylation	1
	GO:0051098	regulation of binding	1
	GO:0051259	protein oligomerization	1
	GO:1901606	alpha-amino acid catabolic process	1
	GO:0048518	positive regulation of biological process	1
	GO:0009617	response to bacterium	1
	GO:0042742	defense response to bacterium	1
	GO:0009117	nucleotide metabolic process	1
	GO:1901701	cellular response to oxygen-containing compound	1
	GO:0032501	multicellular organismal process	1
	GO:0072330	monocarboxylic acid biosynthetic process	1
	GO:0006605	protein targeting	1
	GO:0071669	plant-type cell wall organization or biogenesis	1
	GO:0044700	single organism signaling	1
	GO:0009648	photoperiodism	1
	GO:0080134	regulation of response to stress	1
	GO:0042325	regulation of phosphorylation	1
	GO:0046112	nucleobase biosynthetic process	1
	GO:0044703	multi-organism reproductive process	1
	GO:0034655	nucleobase-containing compound catabolic process	1
	GO:0000741	karyogamy	1
	GO:0046165	alcohol biosynthetic process	1
	GO:0009845	seed germination	1
	GO:0090351	seedling development	1
	GO:0048285	organelle fission	1
	GO:0031326	regulation of cellular biosynthetic process	1
	GO:0006820	anion transport	1
	GO:0072521	purine-containing compound metabolic process	1
	GO:0009814	defense response, incompatible interaction	1
	GO:0010876	lipid localization	1
	GO:0006767	water-soluble vitamin metabolic process	1
	GO:0046434	organophosphate catabolic process	1
	GO:1901292	nucleoside phosphate catabolic process	1
	GO:0031047	gene silencing by RNA	1
	GO:0035194	posttranscriptional gene silencing by RNA	1
	GO:0042743	hydrogen peroxide metabolic process	1
	GO:0019637	organophosphate metabolic process	1
	GO:0006457	protein folding	1
	GO:0009611	response to wounding	1
	GO:0010410	hemicellulose metabolic process	1
	GO:0010413	glucuronoxylan metabolic process	1
	GO:0015995	chlorophyll biosynthetic process	1
	GO:0019852	L-ascorbic acid metabolic process	1
	GO:0042126	nitrate metabolic process	1
	GO:0045491	xylan metabolic process	1
	GO:0003006	developmental process involved in reproduction	1
	GO:0008544	epidermis development	1
	GO:0018205	peptidyl-lysine modification	1
	GO:0048522	positive regulation of cellular process	1
	GO:0048437	floral organ development	1
	GO:0009116	nucleoside metabolic process	1
	GO:0009119	ribonucleoside metabolic process	1
	GO:0043401	steroid hormone mediated signaling pathway	1
	GO:0048545	response to steroid hormone	1
	GO:0071383	cellular response to steroid hormone stimulus	1
	GO:0030865	cortical cytoskeleton organization	1
	GO:0009416	response to light stimulus	1
	GO:0009640	photomorphogenesis	1
	GO:0009739	response to gibberellin	1
	GO:0010476	gibberellin mediated signaling pathway	1
	GO:0071370	cellular response to gibberellin stimulus	1
	GO:0033014	tetrapyrrole biosynthetic process	1
	GO:0006886	intracellular protein transport	1
	GO:0065008	regulation of biological quality	1
	GO:0006575	cellular modified amino acid metabolic process	1
	GO:0034645	cellular macromolecule biosynthetic process	1
	GO:0009606	tropism	1
	GO:0009889	regulation of biosynthetic process	1
	GO:0009266	response to temperature stimulus	1
	GO:0009553	embryo sac development	1
	GO:0009733	response to auxin	1
	GO:0010074	maintenance of meristem identity	1
	GO:0048284	organelle fusion	1
	GO:0010556	regulation of macromolecule biosynthetic process	1
	GO:2000112	regulation of cellular macromolecule biosynthetic process	1
	GO:0002376	immune system process	1
	GO:0046128	purine ribonucleoside metabolic process	1
	GO:0019439	aromatic compound catabolic process	1
	GO:0009699	phenylpropanoid biosynthetic process	1
	GO:0006026	aminoglycan catabolic process	1
	GO:2001057	reactive nitrogen species metabolic process	1
	GO:0032989	cellular component morphogenesis	1
	GO:0006612	protein targeting to membrane	1
	GO:0009900	dehiscence	1
	GO:0072657	protein localization to membrane	1
	GO:0090150	establishment of protein localization to membrane	1
	GO:0016049	cell growth	1
	GO:0008202	steroid metabolic process	1
	GO:0031347	regulation of defense response	1
	GO:0009630	gravitropism	1
	GO:1901698	response to nitrogen compound	1
	GO:0006766	vitamin metabolic process	1
	GO:0003002	regionalization	1
	GO:0009059	macromolecule biosynthetic process	1
	GO:0016114	terpenoid biosynthetic process	1
	GO:0006739	NADP metabolic process	1
	GO:0007186	G-protein coupled receptor signaling pathway	1
	GO:0042278	purine nucleoside metabolic process	1
	GO:0009698	phenylpropanoid metabolic process	1
	GO:0010468	regulation of gene expression	1
	GO:0044270	cellular nitrogen compound catabolic process	1
	GO:0046700	heterocycle catabolic process	1
	GO:0006351	transcription, DNA-templated	1
	GO:0032774	RNA biosynthetic process	1
	GO:0097659	nucleic acid-templated transcription	1
	GO:0016441	posttranscriptional gene silencing	1
	GO:0009123	nucleoside monophosphate metabolic process	1
	GO:0090558	plant epidermis development	1
	GO:1901566	organonitrogen compound biosynthetic process	1
	GO:0009608	response to symbiont	1
	GO:0010383	cell wall polysaccharide metabolic process	1
	GO:0030258	lipid modification	1
	GO:0001101	response to acid chemical	1
	GO:1901361	organic cyclic compound catabolic process	1
	GO:0009629	response to gravity	1
	GO:0007167	enzyme linked receptor protein signaling pathway	1
	GO:0009653	anatomical structure morphogenesis	1
	GO:0009143	nucleoside triphosphate catabolic process	1
	GO:0009146	purine nucleoside triphosphate catabolic process	1
	GO:0009203	ribonucleoside triphosphate catabolic process	1
	GO:0009207	purine ribonucleoside triphosphate catabolic process	1
	GO:0006397	mRNA processing	1
	GO:0006829	zinc II ion transport	1
	GO:0007015	actin filament organization	1
	GO:0009687	abscisic acid metabolic process	1
	GO:0043288	apocarotenoid metabolic process	1
	GO:0044036	cell wall macromolecule metabolic process	1
	GO:1902644	tertiary alcohol metabolic process	1
	GO:0008643	carbohydrate transport	1
	GO:0046488	phosphatidylinositol metabolic process	1
	GO:1901293	nucleoside phosphate biosynthetic process	1
	GO:0015994	chlorophyll metabolic process	1
	GO:1901607	alpha-amino acid biosynthetic process	1
	GO:1903509	liposaccharide metabolic process	1
	GO:0006694	steroid biosynthetic process	1
	GO:0009066	aspartate family amino acid metabolic process	1
	GO:0071396	cellular response to lipid	1
	GO:0007126	meiotic nuclear division	1
	GO:0016109	tetraterpenoid biosynthetic process	1
	GO:0006650	glycerophospholipid metabolic process	1
	GO:0043648	dicarboxylic acid metabolic process	1
	GO:0006760	folic acid-containing compound metabolic process	1
	GO:0008033	tRNA processing	1
	GO:0009832	plant-type cell wall biogenesis	1
	GO:0009141	nucleoside triphosphate metabolic process	1
	GO:0009408	response to heat	1
	GO:0072522	purine-containing compound biosynthetic process	1
	GO:0006631	fatty acid metabolic process	1
	GO:1901575	organic substance catabolic process	1
	GO:0009167	purine ribonucleoside monophosphate metabolic process	1
	GO:0002682	regulation of immune system process	1
	GO:0009150	purine ribonucleotide metabolic process	1
	GO:0006461	protein complex assembly	1
	GO:0006401	RNA catabolic process	1
	GO:0006544	glycine metabolic process	1
	GO:0019220	regulation of phosphate metabolic process	1
	GO:0042558	pteridine-containing compound metabolic process	1
	GO:0051174	regulation of phosphorus metabolic process	1
	GO:0009124	nucleoside monophosphate biosynthetic process	1
	GO:0070271	protein complex biogenesis	1
	GO:0071822	protein complex subunit organization	1
	GO:0009451	RNA modification	1
	GO:0033365	protein localization to organelle	1
	GO:0044093	positive regulation of molecular function	1
	GO:0034613	cellular protein localization	1
	GO:0070727	cellular macromolecule localization	1
	GO:0009259	ribonucleotide metabolic process	1
	GO:0071229	cellular response to acid chemical	1
	GO:0009126	purine nucleoside monophosphate metabolic process	1
	GO:0016054	organic acid catabolic process	1
	GO:0019693	ribose phosphate metabolic process	1
	GO:0046395	carboxylic acid catabolic process	1
	GO:0007389	pattern specification process	1
	GO:0048509	regulation of meristem development	1
	GO:0045595	regulation of cell differentiation	1
	GO:0010118	stomatal movement	1
	GO:0006732	coenzyme metabolic process	1
	GO:0030003	cellular cation homeostasis	1
	GO:0046034	ATP metabolic process	1
	GO:0034470	ncRNA processing	1
	GO:0006779	porphyrin-containing compound biosynthetic process	1
	GO:0006644	phospholipid metabolic process	1
	GO:0030036	actin cytoskeleton organization	1
	GO:0002218	activation of innate immune response	1
	GO:0002253	activation of immune response	1
	GO:0002684	positive regulation of immune system process	1
	GO:0030029	actin filament-based process	1
	GO:0031349	positive regulation of defense response	1
	GO:0045088	regulation of innate immune response	1
	GO:0045089	positive regulation of innate immune response	1
	GO:0050776	regulation of immune response	1
	GO:0050778	positive regulation of immune response	1
	GO:0006865	amino acid transport	1
	GO:0071407	cellular response to organic cyclic compound	1
	GO:0009142	nucleoside triphosphate biosynthetic process	1
	GO:0015980	energy derivation by oxidation of organic compounds	1
	GO:0009161	ribonucleoside monophosphate metabolic process	1
	GO:0051321	meiotic cell cycle	1
	GO:1903046	meiotic cell cycle process	1
	GO:0009144	purine nucleoside triphosphate metabolic process	1
	GO:0009205	purine ribonucleoside triphosphate metabolic process	1
	GO:0023052	signaling	1
	GO:0033993	response to lipid	1
	GO:0010087	phloem or xylem histogenesis	1
	GO:0009199	ribonucleoside triphosphate metabolic process	1
	GO:0006996	organelle organization	1
	GO:0009746	response to hexose	1
	GO:0034284	response to monosaccharide	1
	GO:0044271	cellular nitrogen compound biosynthetic process	1
	GO:0012501	programmed cell death	1
	GO:0048584	positive regulation of response to stimulus	1
	GO:0007166	cell surface receptor signaling pathway	1
	GO:0048868	pollen tube development	1
	GO:1901617	organic hydroxy compound biosynthetic process	1
	GO:0032446	protein modification by small protein conjugation	1
	GO:0009165	nucleotide biosynthetic process	1
	GO:0043094	cellular metabolic compound salvage	1
	GO:0044802	single-organism membrane organization	1
	GO:0090407	organophosphate biosynthetic process	1
	GO:0009168	purine ribonucleoside monophosphate biosynthetic process	1
	GO:0040007	growth	1
	GO:0006486	protein glycosylation	1
	GO:0009100	glycoprotein metabolic process	1
	GO:0009101	glycoprotein biosynthetic process	1
	GO:0043413	macromolecule glycosylation	1
	GO:0070085	glycosylation	1
	GO:0055085	transmembrane transport	1
	GO:0009056	catabolic process	1
	GO:0006873	cellular ion homeostasis	1
	GO:0055082	cellular chemical homeostasis	1
	GO:0014070	response to organic cyclic compound	1
	GO:0009152	purine ribonucleotide biosynthetic process	1
	GO:0042451	purine nucleoside biosynthetic process	1
	GO:0046129	purine ribonucleoside biosynthetic process	1
	GO:0044765	single-organism transport	1
	GO:0009593	detection of chemical stimulus	1
	GO:0000041	transition metal ion transport	1
	GO:0015849	organic acid transport	1
	GO:0046942	carboxylic acid transport	1
	GO:0007010	cytoskeleton organization	1
	GO:0033013	tetrapyrrole metabolic process	1
	GO:0071705	nitrogen compound transport	1
	GO:0008380	RNA splicing	1
	GO:0016108	tetraterpenoid metabolic process	1
	GO:0048506	regulation of timing of meristematic phase transition	1
	GO:0043623	cellular protein complex assembly	1
	GO:0006396	RNA processing	1
	GO:0033036	macromolecule localization	1
	GO:0009127	purine nucleoside monophosphate biosynthetic process	1
	GO:0016070	RNA metabolic process	1
	GO:0006955	immune response	1
	GO:0045087	innate immune response	1
	GO:0009163	nucleoside biosynthetic process	1
	GO:0009260	ribonucleotide biosynthetic process	1
	GO:0042455	ribonucleoside biosynthetic process	1
	GO:0046390	ribose phosphate biosynthetic process	1
	GO:0098655	cation transmembrane transport	1
	GO:0098660	inorganic ion transmembrane transport	1
	GO:0098662	inorganic cation transmembrane transport	1
	GO:0046486	glycerolipid metabolic process	1
	GO:0040034	regulation of development, heterochronic	1
	GO:0009692	ethylene metabolic process	1
	GO:0043449	cellular alkene metabolic process	1
	GO:1900673	olefin metabolic process	1
	GO:0034220	ion transmembrane transport	1
	GO:0009156	ribonucleoside monophosphate biosynthetic process	1
	GO:0006163	purine nucleotide metabolic process	1
	GO:0030154	cell differentiation	1
	GO:0065003	macromolecular complex assembly	1
	GO:0006754	ATP biosynthetic process	1
	GO:0048878	chemical homeostasis	1
	GO:0000375	RNA splicing, via transesterification reactions	1
	GO:0000377	RNA splicing, via transesterification reactions with bulged adenosine as nucleophile	1
	GO:0032535	regulation of cellular component size	1
	GO:0090066	regulation of anatomical structure size	1
	GO:0009108	coenzyme biosynthetic process	1
	GO:0009738	abscisic acid-activated signaling pathway	1
	GO:0071215	cellular response to abscisic acid stimulus	1
	GO:0097306	cellular response to alcohol	1
	GO:0019725	cellular homeostasis	1
	GO:0034622	cellular macromolecular complex assembly	1
	GO:0051188	cofactor biosynthetic process	1
	GO:0015931	nucleobase-containing compound transport	1
	GO:0016071	mRNA metabolic process	1
	GO:0051186	cofactor metabolic process	1
	GO:1902578	single-organism localization	1
	GO:0009145	purine nucleoside triphosphate biosynthetic process	1
	GO:0009206	purine ribonucleoside triphosphate biosynthetic process	1
	GO:0009411	response to UV	1
	GO:0006164	purine nucleotide biosynthetic process	1
	GO:0055080	cation homeostasis	1
	GO:0015031	protein transport	1
	GO:0045184	establishment of protein localization	1
	GO:0008104	protein localization	1
	GO:0009201	ribonucleoside triphosphate biosynthetic process	1
	GO:0022613	ribonucleoprotein complex biogenesis	1
	GO:0046907	intracellular transport	1
	GO:0042886	amide transport	1
	GO:0006418	tRNA aminoacylation for protein translation	1
	GO:0043038	amino acid activation	1
	GO:0043039	tRNA aminoacylation	1
	GO:0044248	cellular catabolic process	1
	GO:0009062	fatty acid catabolic process	1
	GO:0048527	lateral root development	1
	GO:0072329	monocarboxylic acid catabolic process	1
	GO:0042592	homeostatic process	1
	GO:0045333	cellular respiration	1
	GO:0015711	organic anion transport	1
	GO:0070647	protein modification by small protein conjugation or removal	1
	GO:0006778	porphyrin-containing compound metabolic process	1
	GO:0006869	lipid transport	1
	GO:0009737	response to abscisic acid	1
	GO:0097305	response to alcohol	1
	GO:0050801	ion homeostasis	1
	GO:0051649	establishment of localization in cell	1
	GO:0061024	membrane organization	1
	GO:0090698	post-embryonic plant morphogenesis	1
	GO:0044260	cellular macromolecule metabolic process	1
	GO:0009581	detection of external stimulus	1
	GO:0051606	detection of stimulus	1
	GO:0044242	cellular lipid catabolic process	1
	GO:0044085	cellular component biogenesis	1
	GO:0015988	energy coupled proton transmembrane transport, against electrochemical gradient	1
	GO:0009642	response to light intensity	1
	GO:0015833	peptide transport	1
	GO:0048528	post-embryonic root development	1
	GO:0098771	inorganic ion homeostasis	1
	GO:1902600	hydrogen ion transmembrane transport	1
	GO:0070838	divalent metal ion transport	1
	GO:0072511	divalent inorganic cation transport	1
	GO:0009409	response to cold	1
	GO:0090696	post-embryonic plant organ development	1
	GO:0009657	plastid organization	1
	GO:0016042	lipid catabolic process	1
	GO:0022622	root system development	1
	GO:0048364	root development	1
	GO:0051301	cell division	1
	GO:0006875	cellular metal ion homeostasis	1
	GO:0030001	metal ion transport	1
	GO:0006818	hydrogen transport	1
	GO:0035556	intracellular signal transduction	1
	GO:0055114	oxidation-reduction process	1
	GO:0071702	organic substance transport	1
	GO:0048646	anatomical structure formation involved in morphogenesis	1
	GO:0009856	pollination	1
	GO:0044706	multi-multicellular organism process	1
	GO:0034660	ncRNA metabolic process	1
	GO:0051641	cellular localization	1
	GO:0055065	metal ion homeostasis	1
	GO:1905392	plant organ morphogenesis	1
	GO:0015992	proton transport	1
	GO:0048193	Golgi vesicle transport	1
	GO:0015672	monovalent inorganic cation transport	1
	GO:0009060	aerobic respiration	1
	GO:0022607	cellular component assembly	1
	GO:0006399	tRNA metabolic process	1
	GO:0090697	post-embryonic plant organ morphogenesis	1
	GO:0048468	cell development	1
	GO:0043412	macromolecule modification	1
	GO:0006811	ion transport	1
	GO:0006464	cellular protein modification process	1
	GO:0036211	protein modification process	1
	GO:0006812	cation transport	1
	GO:0009057	macromolecule catabolic process	1
	GO:0006091	generation of precursor metabolites and energy	1
	GO:0043603	cellular amide metabolic process	1
	GO:0022900	electron transport chain	1
	GO:0043170	macromolecule metabolic process	1
	GO:0010015	root morphogenesis	1
	GO:0019941	modification-dependent protein catabolic process	1
	GO:0043632	modification-dependent macromolecule catabolic process	1
	GO:0043043	peptide biosynthetic process	1
	GO:0006518	peptide metabolic process	1
	GO:0043604	amide biosynthetic process	1
	GO:0000904	cell morphogenesis involved in differentiation	1
	GO:0051603	proteolysis involved in cellular protein catabolic process	1
	GO:0044265	cellular macromolecule catabolic process	1
	GO:0010467	gene expression	1
	GO:0030163	protein catabolic process	1
	GO:0044257	cellular protein catabolic process	1
	GO:0006412	translation	1
	GO:0006508	proteolysis	1
	GO:0016192	vesicle-mediated transport	1
	GO:0051234	establishment of localization	1
	GO:0051179	localization	1
	GO:0006810	transport	1
	GO:0019538	protein metabolic process	1
	GO:0044267	cellular protein metabolic process	1
Cellular component	GO:0000785	chromatin	0.00343	**
	GO:0044427	chromosomal part	0.04715	*
	GO:0005618	cell wall	0.04794	*
	GO:0005694	chromosome	0.09341
	GO:0005795	Golgi stack	0.37715
	GO:0031985	Golgi cisterna	0.37715
	GO:0098791	Golgi subcompartment	0.37715
	GO:0032300	mismatch repair complex	1
	GO:0030312	external encapsulating structure	1
	GO:0071944	cell periphery	1
	GO:0043233	organelle lumen	1
	GO:0070013	intracellular organelle lumen	1
	GO:0031974	membrane-enclosed lumen	1
	GO:0031981	nuclear lumen	1
	GO:0032993	protein-DNA complex	1
	GO:1990391	DNA repair complex	1
	GO:0044428	nuclear part	1
	GO:0005758	mitochondrial intermembrane space	1
	GO:0031970	organelle envelope lumen	1
	GO:0016021	integral component of membrane	1
	GO:0005634	nucleus	1
	GO:0005769	early endosome	1
	GO:0005654	nucleoplasm	1
	GO:0044451	nucleoplasm part	1
	GO:0016591	DNA-directed RNA polymerase II, holoenzyme	1
	GO:0005886	plasma membrane	1
	GO:0044459	plasma membrane part	1
	GO:0016604	nuclear body	1
	GO:0000139	Golgi membrane	1
	GO:0005576	extracellular region	1
	GO:0000793	condensed chromosome	1
	GO:0005657	replication fork	1
	GO:0042579	microbody	1
	GO:0000152	nuclear ubiquitin ligase complex	1
	GO:0000428	DNA-directed RNA polymerase complex	1
	GO:0030880	RNA polymerase complex	1
	GO:0055029	nuclear DNA-directed RNA polymerase complex	1
	GO:0009528	plastid inner membrane	1
	GO:1990234	transferase complex	1
	GO:0061695	transferase complex, transferring phosphorus-containing groups	1
	GO:0044424	intracellular part	1
	GO:0031228	intrinsic component of Golgi membrane	1
	GO:0005622	intracellular	1
	GO:0005667	transcription factor complex	1
	GO:0043231	intracellular membrane-bounded organelle	1
	GO:0019897	extrinsic component of plasma membrane	1
	GO:0031234	extrinsic component of cytoplasmic side of plasma membrane	1
	GO:0031225	anchored component of membrane	1
	GO:0009898	cytoplasmic side of plasma membrane	1
	GO:0098552	side of membrane	1
	GO:0098562	cytoplasmic side of membrane	1
	GO:0005911	cell-cell junction	1
	GO:0005623	cell	1
	GO:0044464	cell part	1
	GO:0000151	ubiquitin ligase complex	1
	GO:0019898	extrinsic component of membrane	1
	GO:0030054	cell junction	1
	GO:0005794	Golgi apparatus	1
	GO:0044431	Golgi apparatus part	1
	GO:0030118	clathrin coat	1
	GO:0005768	endosome	1
	GO:0043227	membrane-bounded organelle	1
	GO:0031461	cullin-RING ubiquitin ligase complex	1
	GO:0043228	non-membrane-bounded organelle	1
	GO:0043232	intracellular non-membrane-bounded organelle	1
	GO:0044463	cell projection part	1
	GO:0043226	organelle	1
	GO:0005819	spindle	1
	GO:0043229	intracellular organelle	1
	GO:0042170	plastid membrane	1
	GO:0030119	AP-type membrane coat adaptor complex	1
	GO:0010008	endosome membrane	1
	GO:0044440	endosomal part	1
	GO:0000313	organellar ribosome	1
	GO:0031300	intrinsic component of organelle membrane	1
	GO:0000228	nuclear chromosome	1
	GO:0030133	transport vesicle	1
	GO:0015630	microtubule cytoskeleton	1
	GO:0042995	cell projection	1
	GO:0000325	plant-type vacuole	1
	GO:0031224	intrinsic component of membrane	1
	GO:0005773	vacuole	1
	GO:0031090	organelle membrane	1
	GO:0031410	cytoplasmic vesicle	1
	GO:0097708	intracellular vesicle	1
	GO:0044421	extracellular region part	1
	GO:0009941	chloroplast envelope	1
	GO:0031982	vesicle	1
	GO:1902494	catalytic complex	1
	GO:0012505	endomembrane system	1
	GO:0030964	NADH dehydrogenase complex	1
	GO:0005635	nuclear envelope	1
	GO:1990204	oxidoreductase complex	1
	GO:0005838	proteasome regulatory particle	1
	GO:0022624	proteasome accessory complex	1
	GO:0005789	endoplasmic reticulum membrane	1
	GO:0042175	nuclear outer membrane-endoplasmic reticulum membrane network	1
	GO:0009523	photosystem II	1
	GO:0005856	cytoskeleton	1
	GO:0044430	cytoskeletal part	1
	GO:0098588	bounding membrane of organelle	1
	GO:0032991	macromolecular complex	1
	GO:0015629	actin cytoskeleton	1
	GO:0019867	outer membrane	1
	GO:0031968	organelle outer membrane	1
	GO:0016020	membrane	1
	GO:0000502	proteasome complex	1
	GO:1905368	peptidase complex	1
	GO:1905369	endopeptidase complex	1
	GO:0044425	membrane part	1
	GO:0044433	cytoplasmic vesicle part	1
	GO:0030117	membrane coat	1
	GO:0048475	coated membrane	1
	GO:0005740	mitochondrial envelope	1
	GO:0030529	intracellular ribonucleoprotein complex	1
	GO:1990904	ribonucleoprotein complex	1
	GO:0044432	endoplasmic reticulum part	1
	GO:0016469	proton-transporting two-sector ATPase complex	1
	GO:0043234	protein complex	1
	GO:0005783	endoplasmic reticulum	1
	GO:0009521	photosystem	1
	GO:0034357	photosynthetic membrane	1
	GO:0044436	thylakoid part	1
	GO:0044422	organelle part	1
	GO:0005739	mitochondrion	1
	GO:0044429	mitochondrial part	1
	GO:0005840	ribosome	1
	GO:0009526	plastid envelope	1
	GO:0098805	whole membrane	1
	GO:0009532	plastid stroma	1
	GO:0031966	mitochondrial membrane	1
	GO:0009570	chloroplast stroma	1
	GO:0044455	mitochondrial membrane part	1
	GO:0005746	mitochondrial respiratory chain	1
	GO:0070469	respiratory chain	1
	GO:0031984	organelle subcompartment	1
	GO:0015935	small ribosomal subunit	1
	GO:0019866	organelle inner membrane	1
	GO:0009536	plastid	1
	GO:0005743	mitochondrial inner membrane	1
	GO:0009534	chloroplast thylakoid	1
	GO:0098796	membrane protein complex	1
	GO:0044446	intracellular organelle part	1
	GO:0031976	plastid thylakoid	1
	GO:0015934	large ribosomal subunit	1
	GO:0009579	thylakoid	1
	GO:0044435	plastid part	1
	GO:0044434	chloroplast part	1
	GO:0009507	chloroplast	1
	GO:0031967	organelle envelope	1
	GO:0031975	envelope	1
	GO:0044444	cytoplasmic part	1
	GO:0005737	cytoplasm	1
	GO:0044391	ribosomal subunit	1
Molecular function	GO:0016491	oxidoreductase activity	0.00377	**
	GO:0003824	catalytic activity	0.02204	*
	GO:0061134	peptidase regulator activity	0.0452	*
	GO:0061135	endopeptidase regulator activity	0.0452	*
	GO:0005506	iron ion binding	0.0705
	GO:0016829	lyase activity	0.15785
	GO:0016801	hydrolase activity, acting on ether bonds	0.27277
	GO:0016887	ATPase activity	0.29515
	GO:0042623	ATPase activity, coupled	0.45352
	GO:0016728	oxidoreductase activity, acting on CH or CH2 groups, disulfide as acceptor	0.60538
	GO:0016701	oxidoreductase activity, acting on single donors with incorporation of molecular oxygen	0.73766
	GO:0016782	transferase activity, transferring sulfur-containing groups	0.8036
	GO:0016757	transferase activity, transferring glycosyl groups	0.84222
	GO:0016702	oxidoreductase activity, acting on single donors with incorporation of molecular oxygen, incorporation of two atoms of oxygen	0.96002
	GO:0009975	cyclase activity	1
	GO:0051213	dioxygenase activity	1
	GO:0043565	sequence-specific DNA binding	1
	GO:0016803	ether hydrolase activity	1
	GO:0003677	DNA binding	1
	GO:0016831	carboxy-lyase activity	1
	GO:0005488	binding	1
	GO:0016779	nucleotidyltransferase activity	1
	GO:0008146	sulfotransferase activity	1
	GO:0016725	oxidoreductase activity, acting on CH or CH2 groups	1
	GO:0016662	oxidoreductase activity, acting on other nitrogenous compounds as donors, cytochrome as acceptor	1
	GO:0031406	carboxylic acid binding	1
	GO:0043177	organic acid binding	1
	GO:0016410	N-acyltransferase activity	1
	GO:0016838	carbon-oxygen lyase activity, acting on phosphates	1
	GO:0003909	DNA ligase activity	1
	GO:0008905	mannose-phosphate guanylyltransferase activity	1
	GO:0047364	desulfoglucosinolate sulfotransferase activity	1
	GO:0010333	terpene synthase activity	1
	GO:0070568	guanylyltransferase activity	1
	GO:0004386	helicase activity	1
	GO:0016835	carbon-oxygen lyase activity	1
	GO:0003690	double-stranded DNA binding	1
	GO:0008194	UDP-glycosyltransferase activity	1
	GO:0003724	RNA helicase activity	1
	GO:0016840	carbon-nitrogen lyase activity	1
	GO:0035251	UDP-glucosyltransferase activity	1
	GO:0016741	transferase activity, transferring one-carbon groups	1
	GO:0008796	bis(5'-nucleosyl)-tetraphosphatase activity	1
	GO:0016636	oxidoreductase activity, acting on the CH-CH group of donors, iron-sulfur protein as acceptor	1
	GO:0008276	protein methyltransferase activity	1
	GO:0008168	methyltransferase activity	1
	GO:0046527	glucosyltransferase activity	1
	GO:0016886	ligase activity, forming phosphoric ester bonds	1
	GO:0016211	ammonia ligase activity	1
	GO:0016774	phosphotransferase activity, carboxyl group as acceptor	1
	GO:0016880	acid-ammonia (or amide) ligase activity	1
	GO:0016830	carbon-carbon lyase activity	1
	GO:0016462	pyrophosphatase activity	1
	GO:0016783	sulfurtransferase activity	1
	GO:0016818	hydrolase activity, acting on acid anhydrides, in phosphorus-containing anhydrides	1
	GO:0016817	hydrolase activity, acting on acid anhydrides	1
	GO:0003899	DNA-directed 5'-3' RNA polymerase activity	1
	GO:0015179	L-amino acid transmembrane transporter activity	1
	GO:0030247	polysaccharide binding	1
	GO:0016160	amylase activity	1
	GO:0016705	oxidoreductase activity, acting on paired donors, with incorporation or reduction of molecular oxygen	1
	GO:0008080	N-acetyltransferase activity	1
	GO:0003676	nucleic acid binding	1
	GO:0030246	carbohydrate binding	1
	GO:0016623	oxidoreductase activity, acting on the aldehyde or oxo group of donors, oxygen as acceptor	1
	GO:0016903	oxidoreductase activity, acting on the aldehyde or oxo group of donors	1
	GO:0004468	lysine N-acetyltransferase activity, acting on acetyl phosphate as donor	1
	GO:0043566	structure-specific DNA binding	1
	GO:0043168	anion binding	1
	GO:0016740	transferase activity	1
	GO:0015172	acidic amino acid transmembrane transporter activity	1
	GO:0050661	NADP binding	1
	GO:0051184	cofactor transporter activity	1
	GO:0017111	nucleoside-triphosphatase activity	1
	GO:0003973	(S)-2-hydroxy-acid oxidase activity	1
	GO:0005253	anion channel activity	1
	GO:0005254	chloride channel activity	1
	GO:0000989	transcription factor activity, transcription factor binding	1
	GO:0001871	pattern binding	1
	GO:0032559	adenyl ribonucleotide binding	1
	GO:0003678	DNA helicase activity	1
	GO:0030554	adenyl nucleotide binding	1
	GO:0016841	ammonia-lyase activity	1
	GO:0016843	amine-lyase activity	1
	GO:0004031	aldehyde oxidase activity	1
	GO:0015174	basic amino acid transmembrane transporter activity	1
	GO:0016247	channel regulator activity	1
	GO:0016248	channel inhibitor activity	1
	GO:0016661	oxidoreductase activity, acting on other nitrogenous compounds as donors	1
	GO:0016802	trialkylsulfonium hydrolase activity	1
	GO:0018488	aryl-aldehyde oxidase activity	1
	GO:0016846	carbon-sulfur lyase activity	1
	GO:0015108	chloride transmembrane transporter activity	1
	GO:0016758	transferase activity, transferring hexosyl groups	1
	GO:0016763	transferase activity, transferring pentosyl groups	1
	GO:0016671	oxidoreductase activity, acting on a sulfur group of donors, disulfide as acceptor	1
	GO:0016273	arginine N-methyltransferase activity	1
	GO:0016274	protein-arginine N-methyltransferase activity	1
	GO:0030234	enzyme regulator activity	1
	GO:0034061	DNA polymerase activity	1
	GO:0098772	molecular function regulator	1
	GO:0016407	acetyltransferase activity	1
	GO:0008320	protein transmembrane transporter activity	1
	GO:0022884	macromolecule transmembrane transporter activity	1
	GO:0048037	cofactor binding	1
	GO:0016706	oxidoreductase activity, acting on paired donors, with incorporation or reduction of molecular oxygen, 2-oxoglutarate as one donor, and incorporation of one atom each of oxygen into both donors	1
	GO:0008170	N-methyltransferase activity	1
	GO:0003916	DNA topoisomerase activity	1
	GO:0016634	oxidoreductase activity, acting on the CH-CH group of donors, oxygen as acceptor	1
	GO:0016759	cellulose synthase activity	1
	GO:0016616	oxidoreductase activity, acting on the CH-OH group of donors, NAD or NADP as acceptor	1
	GO:0016620	oxidoreductase activity, acting on the aldehyde or oxo group of donors, NAD or NADP as acceptor	1
	GO:0016638	oxidoreductase activity, acting on the CH-NH2 group of donors	1
	GO:0000988	transcription factor activity, protein binding	1
	GO:0016639	oxidoreductase activity, acting on the CH-NH2 group of donors, NAD or NADP as acceptor	1
	GO:0004497	monooxygenase activity	1
	GO:0008757	S-adenosylmethionine-dependent methyltransferase activity	1
	GO:0016278	lysine N-methyltransferase activity	1
	GO:0016279	protein-lysine N-methyltransferase activity	1
	GO:0016614	oxidoreductase activity, acting on CH-OH group of donors	1
	GO:0008172	S-methyltransferase activity	1
	GO:0008443	phosphofructokinase activity	1
	GO:0004601	peroxidase activity	1
	GO:0016684	oxidoreductase activity, acting on peroxide as acceptor	1
	GO:0018024	histone-lysine N-methyltransferase activity	1
	GO:0042054	histone methyltransferase activity	1
	GO:0016857	racemase and epimerase activity, acting on carbohydrates and derivatives	1
	GO:0016836	hydro-lyase activity	1
	GO:0034062	5'-3' RNA polymerase activity	1
	GO:0097747	RNA polymerase activity	1
	GO:0016641	oxidoreductase activity, acting on the CH-NH2 group of donors, oxygen as acceptor	1
	GO:0016879	ligase activity, forming carbon-nitrogen bonds	1
	GO:0019200	carbohydrate kinase activity	1
	GO:0070566	adenylyltransferase activity	1
	GO:0015166	polyol transmembrane transporter activity	1
	GO:0015665	alcohol transmembrane transporter activity	1
	GO:0019840	isoprenoid binding	1
	GO:0042887	amide transmembrane transporter activity	1
	GO:1901618	organic hydroxy compound transmembrane transporter activity	1
	GO:0004857	enzyme inhibitor activity	1
	GO:0016780	phosphotransferase activity, for other substituted phosphate groups	1
	GO:0016755	transferase activity, transferring amino-acyl groups	1
	GO:0015038	glutathione disulfide oxidoreductase activity	1
	GO:0015036	disulfide oxidoreductase activity	1
	GO:0005548	phospholipid transporter activity	1
	GO:0004540	ribonuclease activity	1
	GO:0008171	O-methyltransferase activity	1
	GO:0004536	deoxyribonuclease activity	1
	GO:0004551	nucleotide diphosphatase activity	1
	GO:0050664	oxidoreductase activity, acting on NAD(P)H, oxygen as acceptor	1
	GO:0036094	small molecule binding	1
	GO:1901363	heterocyclic compound binding	1
	GO:0016667	oxidoreductase activity, acting on a sulfur group of donors	1
	GO:0097159	organic cyclic compound binding	1
	GO:0016709	oxidoreductase activity, acting on paired donors, with incorporation or reduction of molecular oxygen, NAD(P)H as one donor, and incorporation of one atom of oxygen	1
	GO:0046872	metal ion binding	1
	GO:0000166	nucleotide binding	1
	GO:1901265	nucleoside phosphate binding	1
	GO:0046914	transition metal ion binding	1
	GO:0032553	ribonucleotide binding	1
	GO:0032555	purine ribonucleotide binding	1
	GO:0004871	signal transducer activity	1
	GO:0004712	protein serine/threonine/tyrosine kinase activity	1
	GO:0015037	peptide disulfide oxidoreductase activity	1
	GO:0015562	efflux transmembrane transporter activity	1
	GO:0019203	carbohydrate phosphatase activity	1
	GO:0017076	purine nucleotide binding	1
	GO:0046983	protein dimerization activity	1
	GO:0050662	coenzyme binding	1
	GO:0033218	amide binding	1
	GO:0042277	peptide binding	1
	GO:0005515	protein binding	1
	GO:0097367	carbohydrate derivative binding	1
	GO:0016798	hydrolase activity, acting on glycosyl bonds	1
	GO:0015205	nucleobase transmembrane transporter activity	1
	GO:0016891	endoribonuclease activity, producing 5'-phosphomonoesters	1
	GO:0016884	carbon-nitrogen ligase activity, with glutamine as amido-N-donor	1
	GO:0033612	receptor serine/threonine kinase binding	1
	GO:0003774	motor activity	1
	GO:0004521	endoribonuclease activity	1
	GO:0043167	ion binding	1
	GO:0015103	inorganic anion transmembrane transporter activity	1
	GO:0016893	endonuclease activity, active with either ribo- or deoxyribonucleic acids and producing 5'-phosphomonoesters	1
	GO:0051540	metal cluster binding	1
	GO:0016854	racemase and epimerase activity	1
	GO:0017016	Ras GTPase binding	1
	GO:0031267	small GTPase binding	1
	GO:0051020	GTPase binding	1
	GO:0015002	heme-copper terminal oxidase activity	1
	GO:0016627	oxidoreductase activity, acting on the CH-CH group of donors	1
	GO:0016899	oxidoreductase activity, acting on the CH-OH group of donors, oxygen as acceptor	1
	GO:0016209	antioxidant activity	1
	GO:0016765	transferase activity, transferring alkyl or aryl (other than methyl) groups	1
	GO:0005372	water transmembrane transporter activity	1
	GO:0004030	aldehyde dehydrogenase [NAD(P)+] activity	1
	GO:0004611	phosphoenolpyruvate carboxykinase activity	1
	GO:0015645	fatty acid ligase activity	1
	GO:0043169	cation binding	1
	GO:0016837	carbon-oxygen lyase activity, acting on polysaccharides	1
	GO:0004674	protein serine/threonine kinase activity	1
	GO:0005267	potassium channel activity	1
	GO:0015662	ATPase activity, coupled to transmembrane movement of ions, phosphorylative mechanism	1
	GO:0070567	cytidylyltransferase activity	1
	GO:0042802	identical protein binding	1
	GO:0051536	iron-sulfur cluster binding	1
	GO:0015079	potassium ion transmembrane transporter activity	1
	GO:0015631	tubulin binding	1
	GO:0016862	intramolecular oxidoreductase activity, interconverting keto- and enol-groups	1
	GO:0019206	nucleoside kinase activity	1
	GO:0031420	alkali metal ion binding	1
	GO:0004866	endopeptidase inhibitor activity	1
	GO:0019205	nucleobase-containing compound kinase activity	1
	GO:0030414	peptidase inhibitor activity	1
	GO:0035091	phosphatidylinositol binding	1
	GO:0004553	hydrolase activity, hydrolyzing O-glycosyl compounds	1
	GO:0008252	nucleotidase activity	1
	GO:0051219	phosphoprotein binding	1
	GO:0019842	vitamin binding	1
	GO:0016769	transferase activity, transferring nitrogenous groups	1
	GO:0008565	protein transporter activity	1
	GO:0015171	amino acid transmembrane transporter activity	1
	GO:0008422	beta-glucosidase activity	1
	GO:0016646	oxidoreductase activity, acting on the CH-NH group of donors, NAD or NADP as acceptor	1
	GO:0005275	amine transmembrane transporter activity	1
	GO:0019207	kinase regulator activity	1
	GO:0019899	enzyme binding	1
	GO:0015925	galactosidase activity	1
	GO:0016307	phosphatidylinositol phosphate kinase activity	1
	GO:0016744	transferase activity, transferring aldehyde or ketonic groups	1
	GO:0016832	aldehyde-lyase activity	1
	GO:0016861	intramolecular oxidoreductase activity, interconverting aldoses and ketoses	1
	GO:0005319	lipid transporter activity	1
	GO:0019900	kinase binding	1
	GO:0016874	ligase activity	1
	GO:0005543	phospholipid binding	1
	GO:0004519	endonuclease activity	1
	GO:0004620	phospholipase activity	1
	GO:0046915	transition metal ion transmembrane transporter activity	1
	GO:0005249	voltage-gated potassium channel activity	1
	GO:0019887	protein kinase regulator activity	1
	GO:0022843	voltage-gated cation channel activity	1
	GO:0016772	transferase activity, transferring phosphorus-containing groups	1
	GO:0046943	carboxylic acid transmembrane transporter activity	1
	GO:0016853	isomerase activity	1
	GO:0016776	phosphotransferase activity, phosphate group as acceptor	1
	GO:0016799	hydrolase activity, hydrolyzing N-glycosyl compounds	1
	GO:0019787	ubiquitin-like protein transferase activity	1
	GO:0004702	signal transducer, downstream of receptor, with serine/threonine kinase activity	1
	GO:0005057	signal transducer activity, downstream of receptor	1
	GO:0005244	voltage-gated ion channel activity	1
	GO:0022832	voltage-gated channel activity	1
	GO:0005261	cation channel activity	1
	GO:0004518	nuclease activity	1
	GO:0008509	anion transmembrane transporter activity	1
	GO:0005216	ion channel activity	1
	GO:0022838	substrate-specific channel activity	1
	GO:0008092	cytoskeletal protein binding	1
	GO:0015267	channel activity	1
	GO:0022803	passive transmembrane transporter activity	1
	GO:0008514	organic anion transmembrane transporter activity	1
	GO:0015144	carbohydrate transmembrane transporter activity	1
	GO:1901476	carbohydrate transporter activity	1
	GO:0016860	intramolecular oxidoreductase activity	1
	GO:0004527	exonuclease activity	1
	GO:0008081	phosphoric diester hydrolase activity	1
	GO:0004175	endopeptidase activity	1
	GO:0004722	protein serine/threonine phosphatase activity	1
	GO:0005527	macrolide binding	1
	GO:0008187	poly-pyrimidine tract binding	1
	GO:0005342	organic acid transmembrane transporter activity	1
	GO:0016645	oxidoreductase activity, acting on the CH-NH group of donors	1
	GO:0001071	nucleic acid binding transcription factor activity	1
	GO:0042578	phosphoric ester hydrolase activity	1
	GO:0003727	single-stranded RNA binding	1
	GO:0042626	ATPase activity, coupled to transmembrane movement of substances	1
	GO:0043492	ATPase activity, coupled to movement of substances	1
	GO:0015926	glucosidase activity	1
	GO:0016820	hydrolase activity, acting on acid anhydrides, catalyzing transmembrane movement of substances	1
	GO:0016298	lipase activity	1
	GO:0016787	hydrolase activity	1
	GO:0008289	lipid binding	1
	GO:0008144	drug binding	1
	GO:0016628	oxidoreductase activity, acting on the CH-CH group of donors, NAD or NADP as acceptor	1
	GO:0005102	receptor binding	1
	GO:0060089	molecular transducer activity	1
	GO:0015294	solute:cation symporter activity	1
	GO:0004659	prenyltransferase activity	1
	GO:0015293	symporter activity	1
	GO:0016859	cis-trans isomerase activity	1
	GO:0042625	ATPase coupled ion transmembrane transporter activity	1
	GO:0015197	peptide transporter activity	1
	GO:0099516	ion antiporter activity	1
	GO:0015399	primary active transmembrane transporter activity	1
	GO:0015405	P-P-bond-hydrolysis-driven transmembrane transporter activity	1
	GO:0022853	active ion transmembrane transporter activity	1
	GO:0016301	kinase activity	1
	GO:0015291	secondary active transmembrane transporter activity	1
	GO:0016877	ligase activity, forming carbon-sulfur bonds	1
	GO:0005402	cation:sugar symporter activity	1
	GO:0008483	transaminase activity	1
	GO:0016866	intramolecular transferase activity	1
	GO:0016791	phosphatase activity	1
	GO:0016773	phosphotransferase activity, alcohol group as acceptor	1
	GO:0004672	protein kinase activity	1
	GO:0004812	aminoacyl-tRNA ligase activity	1
	GO:0051119	sugar transmembrane transporter activity	1
	GO:0016811	hydrolase activity, acting on carbon-nitrogen (but not peptide) bonds, in linear amides	1
	GO:0016810	hydrolase activity, acting on carbon-nitrogen (but not peptide) bonds	1
	GO:0004872	receptor activity	1
	GO:0016747	transferase activity, transferring acyl groups other than amino-acyl groups	1
	GO:0022804	active transmembrane transporter activity	1
	GO:0008374	O-acyltransferase activity	1
	GO:0008238	exopeptidase activity	1
	GO:0016881	acid-amino acid ligase activity	1
	GO:0016679	oxidoreductase activity, acting on diphenols and related substances as donors	1
	GO:0022836	gated channel activity	1
	GO:0046873	metal ion transmembrane transporter activity	1
	GO:0016651	oxidoreductase activity, acting on NAD(P)H	1
	GO:0016875	ligase activity, forming carbon-oxygen bonds	1
	GO:0016876	ligase activity, forming aminoacyl-tRNA and related compounds	1
	GO:0016746	transferase activity, transferring acyl groups	1
	GO:0004180	carboxypeptidase activity	1
	GO:0019829	cation-transporting ATPase activity	1
	GO:0016788	hydrolase activity, acting on ester bonds	1
	GO:0004721	phosphoprotein phosphatase activity	1
	GO:0022857	transmembrane transporter activity	1
	GO:0008233	peptidase activity	1
	GO:0070011	peptidase activity, acting on L-amino acid peptides	1
	GO:0015077	monovalent inorganic cation transmembrane transporter activity	1
	GO:0022891	substrate-specific transmembrane transporter activity	1
	GO:0015297	antiporter activity	1
	GO:0016790	thiolester hydrolase activity	1
	GO:0015078	hydrogen ion transmembrane transporter activity	1
	GO:0005198	structural molecule activity	1
	GO:0032561	guanyl ribonucleotide binding	1
	GO:0003723	RNA binding	1
	GO:0019001	guanyl nucleotide binding	1
	GO:0022890	inorganic cation transmembrane transporter activity	1
	GO:0005215	transporter activity	1
	GO:0008324	cation transmembrane transporter activity	1
	GO:0015075	ion transmembrane transporter activity	1
	GO:0022892	substrate-specific transporter activity	1
	GO:0008135	translation factor activity, RNA binding	1
Note: ** indicated the significantly enriched GO terms with corrected P-value <0.01. * indicated the significantly enriched GO terms with 0.01<corrected P-value <0.05.
