# Supplementary material for: BolTLP1, a Thaumatin-like Protein Gene, Confers Tolerance to Salt and Drought Stresses in Broccoli (Brassica oleracea L. var. Italica)
Source: Int J Mol Sci. 2021 Oct 15;22(20):11132. doi: 10.3390/ijms222011132 (PMC8537552; doi:10.3390/ijms222011132)
Supplement: Supplementary file 1 [file ijms-22-11132-s001.zip › Supplementary files/Supplementary Table S3.xlsx]

## Sheet: Sheet1
Supplementary Table S3 Differentially expressed genes involved in significantly enriched GO terms
		Normalized expression level
	Gene ID	Vector controls(CK)	Overexpressed bolTLP1 broccooli (35S::bolTLP1)	log2FoldChange(35S::bolTLP1/CK)	FDR	Up/Down-Regulation(35S::bolTLP1/CK)	P value	Function annoation
DEGs involved in stress responses	LOC106321594	0.01	22.95	11.1643	1.9e-91	Up	2.37e-93	beta-amylase 5 [Brassica oleracea var. oleracea]
	LOC106313751	0.01	20.83	11.0244	2e-105	Up	2.1e-107	auxin-responsive protein IAA9 isoform X1 [Brassica oleracea var. oleracea]
	LOC106313908	0.01	3.21	8.32643	4.25e-10	Up	4.89e-11	dof zinc finger protein DOF5.8-like [Brassica oleracea var. oleracea]
	LOC106316733	0.01	2.6	8.02237	2.97e-21	Up	1.65e-22	putative F-box protein At4g38870 [Brassica oleracea var. oleracea]
	LOC106293552	0.01	1.97	7.62205	1.51e-09	Up	1.83e-10	uncharacterized protein LOC106293552 [Brassica oleracea var. oleracea]
	LOC106313295	0.01	1.62	7.33985	1.26e-07	Up	1.86e-08	respiratory burst oxidase homolog protein C-like [Brassica oleracea var. oleracea]
	LOC106307030	0.01	1.57	7.29462	5.35e-06	Up	9.8e-07	uncharacterized protein LOC106307030 [Brassica oleracea var. oleracea]
	LOC106332232	0.1	14.83	7.21237	6.46e-90	Up	8.19e-92	alanine--glyoxylate aminotransferase 2 homolog 3, mitochondrial [Brassica oleracea var. oleracea]
	LOC106334518	0.01	1.47	7.19967	1.19e-10	Up	1.3e-11	reticuline oxidase-like protein [Brassica oleracea var. oleracea]
	LOC106340598	0.01	1.41	7.13955	1.9e-08	Up	2.57e-09	beta-glucosidase 32-like [Brassica oleracea var. oleracea]
	LOC106341816	0.01	1.38	7.10852	5.38e-09	Up	6.86e-10	beta-glucosidase 32-like [Brassica oleracea var. oleracea]
	LOC106293748	0.01	1.29	7.01123	0.000216	Up	5.15e-05	probable WRKY transcription factor 20 [Brassica oleracea var. oleracea]
	LOC106326442	0.01	1.07	6.74147	1.84e-05	Up	3.67e-06	cytochrome P450 71B2-like isoform X1 [Brassica oleracea var. oleracea]
	LOC106312771	0.01	1.04	6.70044	1.85e-05	Up	3.67e-06	transcription factor PIF6 isoform X3 [Brassica oleracea var. oleracea]
	LOC106298488	0.01	1.02	6.67242	0.000117	Up	2.66e-05	abscisic acid receptor PYL8 [Brassica oleracea var. oleracea]
	LOC106313481	0.01	0.86	6.42626	1.84e-05	Up	3.67e-06	glutamate decarboxylase 1-like [Brassica oleracea var. oleracea]
	LOC106292913	0.06	4.54	6.24159	1.84e-22	Up	9.61e-24	GDSL esterase/lipase ESM1-like [Brassica oleracea var. oleracea]
	LOC106339145	0.01	0.62	5.9542	4.25e-10	Up	4.89e-11	TMV resistance protein N-like [Brassica oleracea var. oleracea]
	LOC106313914	0.33	19.44	5.88042	3.87e-55	Up	8.47e-57	CDY17411.1|//BnaC09g21260D [Brassica napus]
	LOC106316318	0.01	0.54	5.75489	0.000733	Up	0.000193	protein DA1-related 3-like [Brassica oleracea var. oleracea]
	LOC106331773	0.56	25.79	5.52524	3.9e-111	Up	4e-113	peroxidase 22-like [Brassica oleracea var. oleracea]
	LOC106298490	0.08	3.64	5.50779	5.78e-14	Up	4.88e-15	putative peroxisomal acyl-coenzyme A oxidase 1.2 [Brassica oleracea var. oleracea]
	LOC106330903	0.96	42.29	5.46114	2.99e-64	Up	5.48e-66	protein TIFY 5A-like [Brassica oleracea var. oleracea]
	LOC106307131	0.72	28.88	5.32593	2e-116	Up	1.9e-118	bark storage protein A-like [Brassica oleracea var. oleracea]
	LOC106343659	0.35	9.64	4.78361	5.52e-54	Up	1.24e-55	non-specific phospholipase C3 [Brassica oleracea var. oleracea]
	LOC106322283	7.84	201.55	4.68414	5.4e-276	Up	1.8e-278	heat shock protein 90-2 [Brassica napus]
	LOC106323069	0.06	1.51	4.65344	9.3e-06	Up	1.77e-06	protein LIGHT-DEPENDENT SHORT HYPOCOTYLS 1 [Brassica oleracea var. oleracea]
	LOC106325220	0.12	2.93	4.60979	1.82e-10	Up	2.03e-11	aquaporin NIP6-1 [Brassica oleracea var. oleracea]
	LOC106325105	0.06	1.31	4.44846	1.67e-05	Up	3.3e-06	epithiospecifier protein-like [Brassica napus]
	LOC106328768	0.52	11.35	4.44804	2.82e-51	Up	6.63e-53	CBL-interacting serine/threonine-protein kinase 11-like [Brassica oleracea var. oleracea]
	LOC106301560	0.09	1.9	4.39993	9.43e-11	Up	1.02e-11	LOW QUALITY PROTEIN: alpha-humulene/(-)-(E)-beta-caryophyllene synthase [Brassica oleracea var. oleracea]
	LOC106323054	0.12	2.53	4.39803	9.79e-15	Up	7.88e-16	low-temperature-induced 65 kDa protein-like [Brassica oleracea var. oleracea]
	LOC106340886	0.05	0.97	4.27799	5.31e-05	Up	1.14e-05	putative disease resistance protein At4g11170 [Brassica napus]
	LOC106298699	0.07	1.32	4.23704	9.45e-05	Up	2.12e-05	inorganic pyrophosphatase 1-like [Brassica oleracea var. oleracea]
	LOC106334523	0.11	2.07	4.23405	4.68e-12	Up	4.55e-13	reticuline oxidase-like protein [Brassica oleracea var. oleracea]
	LOC106321694	0.31	5.42	4.12795	6.05e-26	Up	2.75e-27	reticuline oxidase-like protein, partial [Brassica oleracea var. oleracea]
	LOC106298388	0.2	3.06	3.93546	2.3e-10	Up	2.57e-11	homeobox-leucine zipper protein ATHB-13 [Brassica rapa]
	LOC106296731	9.66	134.51	3.79955	0	Up	0	lectin-like protein At1g53070 [Brassica oleracea var. oleracea]
	LOC106336913	0.25	3.29	3.71809	3.83e-19	Up	2.37e-20	proline-rich receptor-like protein kinase PERK2 [Brassica oleracea var. oleracea]
	LOC106296668	59.82	779.1	3.70311	0	Up	0	beta-D-glucopyranosyl abscisate beta-glucosidase-like [Brassica oleracea var. oleracea]
	LOC106322574	0.79	9.64	3.60911	7.59e-60	Up	1.49e-61	LOW QUALITY PROTEIN: heat shock 70 kDa protein 3-like [Brassica oleracea var. oleracea]
	LOC106343454	28.58	342.89	3.58467	0	Up	0	non-classical arabinogalactan protein 31 [Brassica oleracea var. oleracea]
	LOC106307357	0.07	0.79	3.49643	1.85e-05	Up	3.69e-06	LOW QUALITY PROTEIN: receptor-like protein 2 [Brassica oleracea var. oleracea]
	LOC106296341	1.73	19.41	3.48796	4.04e-65	Up	7.31e-67	ifier protein-like [Brassica napus]
	LOC106308073	3.98	40.77	3.35667	6.47e-55	Up	1.43e-56	thioredoxin H-type [Brassica oleracea var. oleracea]
	LOC106335780	0.4	4.03	3.33271	6.57e-07	Up	1.07e-07	18 kDa seed maturation protein-like [Brassica oleracea var. oleracea]
	LOC106337668	1.4	13.57	3.27692	1.05e-65	Up	1.86e-67	tryptophan N-monooxygenase 2 [Brassica oleracea var. oleracea]
	LOC106316287	1.09	10.5	3.26799	1.72e-13	Up	1.51e-14	gibberellin-regulated protein 7 isoform X2 [Brassica oleracea var. oleracea]
	LOC106298364	0.17	1.62	3.25239	1.01e-05	Up	1.92e-06	ninja-family protein AFP1-like [Brassica oleracea var. oleracea]
	LOC106336052	0.14	1.27	3.18133	4.38e-09	Up	5.53e-10	sucrose synthase 1 [Brassica oleracea var. oleracea]
	LOC106305810	0.15	1.36	3.18057	0.000485	Up	0.000124	E3 ubiquitin-protein ligase BOI-like [Brassica oleracea var. oleracea]
	LOC106313235	0.34	3.08	3.17932	1.24e-08	Up	1.65e-09	peroxidase 37 [Brassica oleracea var. oleracea]
	LOC106313773	2.5	22.49	3.16928	3.31e-68	Up	5.59e-70	dehydration-responsive protein RD22-like [Brassica oleracea var. oleracea]
	LOC106339986	0.32	2.72	3.08746	4.21e-09	Up	5.29e-10	leucoanthocyanidin dioxygenase [Brassica oleracea var. oleracea]
	LOC106328101	0.46	3.79	3.04249	9.02e-14	Up	7.73e-15	tubulin beta-9 chain [Brassica rapa]
	LOC106322964	8.83	72.66	3.04068	7.4e-119	Up	6.9e-121	MLP-like protein 328 [Brassica rapa]
	LOC106295110	109.49	899.05	3.0376	0	Up	0	jacalin-related lectin 35 [Brassica oleracea var. oleracea]
	LOC106300718	21.66	174.86	3.01309	0	Up	0	beta-D-glucopyranosyl abscisate beta-glucosidase-like [Brassica oleracea var. oleracea]
	LOC106336514	4.41	35.34	3.00245	2.6e-234	Up	1.1e-236	diacylglycerol kinase 1-like [Brassica oleracea var. oleracea]
	LOC106336092	13.01	103.2	2.98775	0	Up	0	phosphoserine aminotransferase 1, chloroplastic [Brassica oleracea var. oleracea]
	LOC106316858	1.05	8.17	2.95995	5.31e-15	Up	4.2e-16	allene oxide cyclase 2, chloroplastic-like [Brassica oleracea var. oleracea]
	LOC106340391	0.39	2.91	2.89947	5.17e-07	Up	8.28e-08	annexin D3-like [Brassica oleracea var. oleracea]
	LOC106316157	0.92	6.71	2.86661	1.34e-20	Up	7.66e-22	cytosolic sulfotransferase 15-like [Brassica oleracea var. oleracea]
	LOC106304648	0.63	4.58	2.86192	2.41e-05	Up	4.88e-06	UPF0057 membrane protein At4g30650 [Brassica oleracea var. oleracea]
	LOC106316002	0.45	3.26	2.85688	7.88e-21	Up	4.45e-22	ethylene receptor 2 [Brassica oleracea var. oleracea]
	LOC106333342	0.46	3.33	2.85582	0.000394	Up	9.84e-05	HVA22-like protein e [Brassica napus]
	LOC106297269	0.46	3.33	2.85582	2.41e-05	Up	4.88e-06	protein cornichon homolog 1-like [Brassica oleracea var. oleracea]
	LOC106338528	0.48	3.47	2.85383	0.000236	Up	5.67e-05	uncharacterized protein LOC106338528, partial [Brassica oleracea var. oleracea]
	LOC106293773	0.42	2.99	2.83168	3.11e-08	Up	4.31e-09	gibberellin 2-beta-dioxygenase 2-like [Brassica oleracea var. oleracea]
	LOC106310473	1.31	9.18	2.80893	2.16e-36	Up	7.22e-38	indole-3-acetic acid-amido synthetase GH3.3 [Brassica oleracea var. oleracea]
	LOC106343057	0.16	1.12	2.80735	0.000393	Up	9.84e-05	alpha-amylase 1 [Brassica oleracea var. oleracea]
	LOC106337582	21.89	153.15	2.8066	0	Up	0	osmotin-like protein [Brassica oleracea var. oleracea]
	LOC106297104	0.83	5.65	2.76707	2.99e-25	Up	1.39e-26	cysteine-rich receptor-like protein kinase 11 [Brassica oleracea var. oleracea]
	LOC106344136	0.51	3.41	2.7412	7.05e-08	Up	1.02e-08	4-coumarate--CoA ligase 2-like, partial [Brassica napus]
	LOC106302134	0.47	3.12	2.73081	4.32e-11	Up	4.56e-12	homeobox protein ATH1-like [Brassica oleracea var. oleracea]
	LOC106307549	0.07	0.45	2.6845	0.000652	Up	0.00017	LOW QUALITY PROTEIN: type I inositol polyphosphate 5-phosphatase 13-like [Brassica oleracea var. oleracea]
	LOC106326980	0.19	1.2	2.65896	1.86e-05	Up	3.71e-06	disease resistance protein RPS6-like [Brassica oleracea var. oleracea]
	LOC106303920	0.31	1.95	2.65313	0.000485	Up	0.000124	dirigent protein 6 [Brassica oleracea var. oleracea]
	LOC106328366	1.89	11.37	2.58877	5.18e-41	Up	1.53e-42	growth-regulating factor 1 [Brassica oleracea var. oleracea]
	LOC106337409	0.6	3.6	2.58496	9.43e-18	Up	6.31e-19	delta-1-pyrroline-5-carboxylate synthase A isoform X1 [Brassica oleracea var. oleracea]
	LOC106337346	1.34	7.87	2.55413	2.48e-24	Up	1.2e-25	protein kinase PINOID [Brassica oleracea var. oleracea]
	LOC106303913	0.24	1.4	2.54432	2.25e-05	Up	4.54e-06	MLO-like protein 8 [Brassica oleracea var. oleracea]
	LOC106318780	4.79	26.43	2.46408	2e-100	Up	2.2e-102	pyruvate decarboxylase 2 [Brassica oleracea var. oleracea]
	LOC106300288	0.86	4.64	2.43172	1.44e-06	Up	2.43e-07	calmodulin-like [Brassica napus]
	LOC106312570	1.27	6.69	2.39718	3.44e-13	Up	3.08e-14	transcription factor bHLH113-like isoform X2 [Brassica oleracea var. oleracea]
	LOC106343816	2.35	12.28	2.38558	7.26e-34	Up	2.59e-35	UDP-glycosyltransferase 72B3 [Brassica oleracea var. oleracea]
	LOC106301277	87.17	452.71	2.37668	0	Up	0	non-classical arabinogalactan protein 31-like [Brassica oleracea var. oleracea]
	LOC106335543	0.37	1.86	2.32971	2.58e-05	Up	5.25e-06	probable sodium/metabolite cotransporter BASS5, chloroplastic [Brassica oleracea var. oleracea]
	LOC106293430	0.65	3.25	2.32193	7.08e-06	Up	1.32e-06	probable WRKY transcription factor 62 [Brassica oleracea var. oleracea]
	LOC106339304	1.76	8.8	2.32193	5.1e-31	Up	1.96e-32	auxin response factor 11 [Brassica oleracea var. oleracea]
	LOC106303861	17.51	86.91	2.31134	1.4e-160	Up	9.3e-163	protein SULFUR DEFICIENCY-INDUCED 1-like [Brassica oleracea var. oleracea]
	LOC106293486	1.86	9.21	2.3079	2.26e-11	Up	2.33e-12	MLP-like protein 328 [Brassica oleracea var. oleracea]
	LOC106301057	0.72	3.49	2.27716	7.87e-08	Up	1.14e-08	nuclear transcription factor Y subunit A-5 [Brassica oleracea var. oleracea]
	LOC106332586	0.72	3.49	2.27716	0.000239	Up	5.75e-05	chaperone protein dnaJ 11, chloroplastic-like [Brassica oleracea var. oleracea]
	LOC106323393	0.33	1.58	2.25939	4.93e-06	Up	8.97e-07	homeobox protein ATH1-like [Brassica oleracea var. oleracea]
	LOC106306287	0.38	1.8	2.24393	0.000378	Up	9.43e-05	protein LIGHT-DEPENDENT SHORT HYPOCOTYLS 1-like [Brassica oleracea var. oleracea]
	LOC106298339	0.83	3.9	2.23229	2.14e-06	Up	3.7e-07	pathogenesis-related protein 5-like [Brassica oleracea var. oleracea]
	LOC106333378	0.63	2.95	2.22729	0.000378	Up	9.43e-05	transcription factor bHLH36-like [Brassica oleracea var. oleracea]
	LOC106328840	0.42	1.94	2.20759	0.000875	Up	0.000234	nuclear transcription factor Y subunit A-5-like [Brassica oleracea var. oleracea]
	LOC106340191	0.76	3.5	2.20328	9.25e-07	Up	1.53e-07	protein POLYCHOME [Brassica oleracea var. oleracea]
	LOC106328432	0.76	3.49	2.19916	3.39e-06	Up	6.02e-07	ethylene-responsive transcription factor RAP2-3-like [Brassica oleracea var. oleracea]
	LOC106316184	5.23	23.88	2.19092	7.48e-33	Up	2.73e-34	peptide methionine sulfoxide reductase A2 [Brassica oleracea var. oleracea]
	LOC106342952	5.28	23.99	2.18382	5.12e-33	Up	1.86e-34	HVA22-like protein d [Brassica oleracea var. oleracea]
	LOC106324950	2.72	12.19	2.16402	2.91e-21	Up	1.61e-22	protein SULFUR DEFICIENCY-INDUCED 1-like [Brassica oleracea var. oleracea]
	LOC106342399	14.44	63.93	2.14642	2.25e-57	Up	4.66e-59	cysteine proteinase inhibitor 3-like [Brassica oleracea var. oleracea]
	LOC106306884	17.98	79.07	2.13674	3.9e-152	Up	2.8e-154	epithiospecifier protein-like [Brassica oleracea var. oleracea]
	LOC106332515	1.05	4.61	2.13438	2.52e-07	Up	3.89e-08	ubiquitin-conjugating enzyme E2 2-like [Brassica oleracea var. oleracea]
	LOC106342610	0.16	0.7	2.12928	7.04e-05	Up	1.54e-05	ABC transporter B family member 4-like [Brassica oleracea var. oleracea]
	LOC106342019	1.93	8.44	2.12864	8.86e-15	Up	7.11e-16	cinnamoyl-CoA reductase 2-like [Brassica napus]
	LOC106311732	11.16	48.7	2.12559	1.15e-75	Up	1.74e-77	methylesterase 9-like [Brassica oleracea var. oleracea]
	LOC106336937	1	4.33	2.11437	1.31e-05	Up	2.54e-06	glycine-rich RNA-binding protein GRP2A [Brassica oleracea var. oleracea]
	LOC106327211	0.94	4.03	2.10005	1.1e-12	Up	1.02e-13	enhanced disease susceptibility 5 [Brassica oleracea var. oleracea]
	LOC106326675	4.9	20.74	2.08156	4.73e-38	Up	1.51e-39	splicing factor U2af small subunit B-like [Brassica napus]
	LOC106311788	1.99	8.38	2.07418	2.31e-11	Up	2.39e-12	auxin-responsive protein IAA3-like [Brassica oleracea var. oleracea]
	LOC106310088	2.41	10.14	2.07295	7.58e-11	Up	8.18e-12	uncharacterized protein LOC106310088 [Brassica oleracea var. oleracea]
	LOC106305690	2.44	10.2	2.06362	6.17e-43	Up	1.74e-44	probable disease resistance protein At5g66900 [Brassica oleracea var. oleracea]
	LOC106296711	5.91	24.65	2.06036	4.36e-43	Up	1.22e-44	NAC domain-containing protein 19 [Brassica oleracea var. oleracea]
	LOC106315996	0.44	1.83	2.05627	2.03e-05	Up	4.07e-06	tyrosine decarboxylase 1 [Brassica oleracea var. oleracea]
	LOC106334812	16.23	66.71	2.03924	7.1e-128	Up	6.1e-130	cystine lyase CORI3-like [Brassica oleracea var. oleracea]
	LOC106327795	0.42	1.72	2.03395	0.000114	Up	2.58e-05	cysteine proteinase RD21a-like [Brassica oleracea var. oleracea]
	LOC106342202	2.47	10.08	2.02891	9.37e-20	Up	5.6e-21	UDP-arabinopyranose mutase 1-like [Brassica oleracea var. oleracea]
	LOC106327677	1.36	5.51	2.01845	2.72e-12	Up	2.59e-13	thiol protease aleurain-like [Brassica oleracea var. oleracea]
	LOC106303755	7.61	30.74	2.01415	2.63e-44	Up	7.2e-46	mitochondrial outer membrane protein porin 2 isoform X2 [Brassica oleracea var. oleracea]
	LOC106331955	134.02	539.35	2.00877	0	Up	0	endochitinase CH25-like [Brassica oleracea var. oleracea]
	LOC106320407	0.9	3.6	2	1.55e-06	Up	2.63e-07	probable WRKY transcription factor 70 isoform X2 [Brassica oleracea var. oleracea]
	LOC106330776	1.49	5.91	1.98785	0.000624	Up	0.000163	hydrophobic protein RCI2B-like [Brassica rapa]
	LOC106305743	2.33	9.22	1.98444	2.53e-19	Up	1.55e-20	thaumatin-like protein 1b [Brassica oleracea var. oleracea]
	LOC106329483	9.45	37.31	1.98118	9.76e-80	Up	1.4e-81	E3 ubiquitin-protein ligase PUB23 [Brassica oleracea var. oleracea]
	LOC106303647	0.54	2.13	1.97982	3.22e-05	Up	6.65e-06	DNA repair protein recA homolog 3, mitochondrial isoform X1 [Brassica oleracea var. oleracea]
	LOC106302142	14.76	57.64	1.96538	7.44e-68	Up	1.27e-69	RING-H2 finger protein ATL45-like [Brassica oleracea var. oleracea]
	LOC106327784	0.93	3.63	1.96467	1.68e-19	Up	1.02e-20	cellulose synthase-like protein D2 [Brassica oleracea var. oleracea]
	LOC106324802	0.73	2.83	1.95483	4.92e-05	Up	1.05e-05	homeobox-leucine zipper protein ATHB-13-like [Brassica oleracea var. oleracea]
	LOC106326941	3.16	12.05	1.93104	7.49e-49	Up	1.87e-50	alpha-glucan phosphorylase 1-like isoform X2 [Brassica oleracea var. oleracea]
	LOC106322838	0.67	2.54	1.9226	1.38e-05	Up	2.7e-06	fe(2+) transport protein 3, chloroplastic-like [Brassica oleracea var. oleracea]
	LOC106341782	1.88	7.08	1.91302	1.12e-11	Up	1.12e-12	peroxidase 30 [Brassica oleracea var. oleracea]
	LOC106304128	5.12	19.27	1.91214	1.36e-20	Up	7.79e-22	HVA22-like protein d [Brassica oleracea var. oleracea]
	LOC106311742	2.46	9.14	1.89354	3.66e-35	Up	1.26e-36	auxin response factor 5-like [Brassica oleracea var. oleracea]
	LOC106298272	2.33	8.64	1.8907	1.2e-14	Up	9.74e-16	isoflavone reductase homolog P3 [Brassica oleracea var. oleracea]
	LOC106335750	4.08	15.12	1.88982	2.14e-49	Up	5.29e-51	BEL1-like homeodomain protein 1 isoform X2 [Brassica oleracea var. oleracea]
	LOC106343665	0.67	2.47	1.88228	8.97e-06	Up	1.7e-06	E3 ubiquitin-protein ligase BAH1-like [Brassica oleracea var. oleracea]
	LOC106293006	1.08	3.98	1.88174	4.87e-05	Up	1.04e-05	auxin-responsive protein IAA19-like [Brassica oleracea var. oleracea]
	LOC106337586	0.94	3.46	1.88004	5.18e-10	Up	6.01e-11	probable inactive leucine-rich repeat receptor-like protein kinase At1g66830 [Brassica oleracea var. oleracea]
	LOC106326949	2.44	8.98	1.87983	3.2e-37	Up	1.05e-38	ATPase 11, plasma membrane-type [Brassica oleracea var. oleracea]
	LOC106309566	1.72	6.33	1.8798	1.56e-08	Up	2.1e-09	germin-like protein subfamily 2 member 1 [Brassica rapa]
	LOC106298548	1.73	6.32	1.86915	2.1e-05	Up	4.22e-06	CDY32007.1|//BnaC06g15850D [Brassica napus]
	LOC106329299	1.28	4.67	1.86728	1.02e-08	Up	1.34e-09	thaumatin-like protein 1b [Brassica oleracea var. oleracea]
	LOC106313559	125.38	455.88	1.86235	0	Up	0	cystine lyase CORI3-like [Brassica oleracea var. oleracea]
	LOC106297354	0.99	3.57	1.85042	3.18e-05	Up	6.57e-06	lectin-like protein At1g53070 [Brassica oleracea var. oleracea]
	LOC106301717	77.86	276.55	1.82859	0	Up	0	cytochrome P450 79B1 [Brassica oleracea var. oleracea]
	LOC106306777	0.6	2.13	1.82782	2.53e-06	Up	4.42e-07	CDY59050.1|//BnaC07g48200D [Brassica napus]
	LOC106326285	1.11	3.9	1.81291	2.37e-08	Up	3.24e-09	protein TRANSPARENT TESTA 12-like [Brassica oleracea var. oleracea]
	LOC106295701	0.94	3.3	1.81173	2.77e-09	Up	3.43e-10	sodium/hydrogen exchanger 2 [Brassica oleracea var. oleracea]
	LOC106324827	53.17	186.13	1.80763	2.7e-113	Up	2.7e-115	defensin-like protein 1 [Brassica oleracea var. oleracea]
	LOC106301678	0.78	2.7	1.79141	0.000108	Up	2.43e-05	dof zinc finger protein DOF3.4-like [Brassica oleracea var. oleracea]
	LOC106321737	2.41	8.3	1.78408	3.82e-06	Up	6.85e-07	alanine--tRNA ligase-like [Brassica oleracea var. oleracea]
	LOC106305680	8.74	29.94	1.77637	1.84e-65	Up	3.27e-67	catalase-1 [Brassica oleracea var. oleracea]
	LOC106322487	0.59	2.01	1.76841	1.63e-07	Up	2.45e-08	phosphoinositide phospholipase C 4 [Brassica oleracea var. oleracea]
	LOC106334914	0.61	2.04	1.74169	4.64e-05	Up	9.87e-06	protein TRANSPARENT TESTA 12-like [Brassica oleracea var. oleracea]
	LOC106325168	6.87	22.94	1.73948	5.16e-25	Up	2.43e-26	inorganic pyrophosphatase 1 [Brassica oleracea var. oleracea]
	LOC106328850	2.23	7.37	1.72462	0.00025	Up	6.01e-05	hydrophobic protein RCI2A [Brassica oleracea var. oleracea]
	LOC106332597	4.05	13.35	1.72085	7.38e-08	Up	1.07e-08	uncharacterized protein LOC106332597 [Brassica oleracea var. oleracea]
	LOC106320417	2.63	8.62	1.71263	2.89e-10	Up	3.27e-11	ras-related protein RABA1c [Brassica oleracea var. oleracea]
	LOC106295893	1.76	5.73	1.70296	4.97e-14	Up	4.18e-15	DEAD-box ATP-dependent RNA helicase 9 [Brassica oleracea var. oleracea]
	LOC106336569	10.15	32.82	1.6931	2.01e-40	Up	6.02e-42	expansin-A3 precursor [Brassica rapa]
	LOC106315949	0.48	1.55	1.69116	0.000238	Up	5.7e-05	recQ-mediated genome instability protein 1 [Brassica oleracea var. oleracea]
	LOC106304017	0.35	1.13	1.6909	0.00035	Up	8.68e-05	sucrose synthase 2 isoform X2 [Brassica oleracea var. oleracea]
	LOC106294962	2.07	6.68	1.69022	3.65e-09	Up	4.56e-10	chaperone protein dnaJ 6 [Brassica oleracea var. oleracea]
	LOC106300081	1.66	5.33	1.68295	1.15e-07	Up	1.7e-08	B-box zinc finger protein 22 [Brassica oleracea var. oleracea]
	LOC106342387	15.7	50.16	1.67577	7.2e-157	Up	5e-159	potassium channel AKT1 [Brassica oleracea var. oleracea]
	LOC106306863	0.72	2.3	1.67556	2.87e-05	Up	5.88e-06	tyrosine decarboxylase 1-like [Brassica oleracea var. oleracea]
	LOC106321807	17.97	57.28	1.67244	3.96e-55	Up	8.66e-57	beta-amylase 5 [Brassica napus]
	LOC106332111	4.33	13.64	1.65541	3.13e-09	Up	3.89e-10	gibberellin-regulated protein 7-like [Brassica rapa]
	LOC106331403	16.99	53.28	1.64891	4.6e-68	Up	7.81e-70	annexin D4-like [Brassica oleracea var. oleracea]
	LOC106315825	56.26	174.2	1.63056	8e-176	Up	4.9e-178	protein TIFY 9-like isoform X1 [Brassica oleracea var. oleracea]
	LOC106342596	0.87	2.69	1.62852	5.95e-08	Up	8.53e-09	probable leucine-rich repeat receptor-like protein kinase IMK3 [Brassica napus]
	LOC106339387	0.9	2.78	1.62709	0.000513	Up	0.000131	uncharacterized protein LOC106339387 [Brassica oleracea var. oleracea]
	LOC106318281	35.87	109.46	1.60955	1.3e-222	Up	6.1e-225	anthranilate synthase alpha subunit 1, chloroplastic [Brassica oleracea var. oleracea]
	LOC106306810	83.32	254.05	1.60838	0	Up	0	epithiospecifier protein-like [Brassica oleracea var. oleracea]
	LOC106343078	4.79	14.58	1.60589	7.37e-18	Up	4.9e-19	GDSL esterase/lipase At3g14220 [Brassica oleracea var. oleracea]
	LOC106295182	0.97	2.95	1.60466	3.5e-05	Up	7.3e-06	gibberellin receptor GID1A [Brassica rapa]
	LOC106295175	2.51	7.6	1.59831	7.81e-27	Up	3.42e-28	auxin response factor 5-like [Brassica oleracea var. oleracea]
	LOC106325229	27.38	82.35	1.58865	1.3e-107	Up	1.4e-109	transcription factor MYB34-like [Brassica oleracea var. oleracea]
	LOC106324674	2.7	8.11	1.58674	7.74e-15	Up	6.18e-16	chaperone protein DnaJ-like [Brassica oleracea var. oleracea]
	LOC106304451	2.67	8.01	1.58496	3.51e-05	Up	7.3e-06	UPF0057 membrane protein At4g30660-like [Brassica oleracea var. oleracea]
	LOC106304796	1.18	3.52	1.57679	1.43e-05	Up	2.8e-06	methyl-CpG-binding domain protein 4-like protein [Brassica oleracea var. oleracea]
	LOC106303664	1.11	3.31	1.57627	0.000306	Up	7.5e-05	CDY47782.1|//BnaC07g41780D [Brassica napus]
	LOC106320705	3.29	9.8	1.57469	6.63e-25	Up	3.13e-26	DNA ligase 1 [Brassica oleracea var. oleracea]
	LOC106296750	1.49	4.43	1.57199	3.75e-06	Up	6.71e-07	probable WRKY transcription factor 70 [Brassica oleracea var. oleracea]
	LOC106304493	75.5	224.44	1.57178	3.9e-187	Up	2.3e-189	allene oxide cyclase 2, chloroplastic-like [Brassica oleracea var. oleracea]
	LOC106324893	1.44	4.28	1.57154	7.97e-05	Up	1.76e-05	L-ascorbate peroxidase 5, peroxisomal [Brassica oleracea var. oleracea]
	LOC106332507	2.97	8.81	1.56868	3.75e-06	Up	6.71e-07	pathogenesis-related protein PR-4-like [Brassica oleracea var. oleracea]
	LOC106306995	0.99	2.9	1.55055	0.000695	Up	0.000182	GATA transcription factor 7 [Brassica oleracea var. oleracea]
	LOC106307099	22.19	64.92	1.54875	5.18e-88	Up	6.69e-90	AP2/ERF and B3 domain-containing transcription factor ARF14 [Brassica oleracea var. oleracea]
	LOC106327972	2.22	6.49	1.54766	5.85e-10	Up	6.81e-11	growth-regulating factor 2-like [Brassica oleracea var. oleracea]
	LOC106300429	5.1	14.89	1.54577	1.83e-44	Up	5.02e-46	alpha-xylosidase 1-like [Brassica oleracea var. oleracea]
	LOC106326829	5.97	17.43	1.54577	2.73e-13	Up	2.42e-14	MLP-like protein 31 [Brassica oleracea var. oleracea]
	LOC106293327	0.57	1.66	1.54215	0.000695	Up	0.000182	ATP-dependent DNA helicase Q-like 1 [Brassica oleracea var. oleracea]
	LOC106320107	1.23	3.58	1.5413	3.06e-09	Up	3.8e-10	boron transporter 1 isoform X1 [Brassica oleracea var. oleracea]
	LOC106340459	1.64	4.77	1.54029	2.22e-06	Up	3.85e-07	ABSCISIC ACID-INSENSITIVE 5-like protein 3 isoform X1 [Brassica oleracea var. oleracea]
	LOC106292758	1.81	5.25	1.53633	3.01e-05	Up	6.19e-06	universal stress protein A-like protein [Brassica oleracea var. oleracea]
	LOC106328425	1.52	4.4	1.53343	8.11e-09	Up	1.05e-09	UDP-glycosyltransferase 72B1-like [Brassica oleracea var. oleracea]
	LOC106328398	2.04	5.89	1.5297	3.83e-14	Up	3.2e-15	potassium transporter 1 [Brassica oleracea var. oleracea]
	LOC106327555	31.14	89.83	1.52843	7.3e-209	Up	3.7e-211	MATE efflux family protein 5 [Brassica oleracea var. oleracea]
	LOC106307704	17.84	51.31	1.52412	3.85e-58	Up	7.9e-60	NADP-dependent D-sorbitol-6-phosphate dehydrogenase-like [Brassica oleracea var. oleracea]
	LOC106293533	3.99	11.46	1.52215	4.86e-11	Up	5.16e-12	chaperone protein dnaJ 6-like isoform X1 [Brassica oleracea var. oleracea]
	LOC106337618	1.47	4.22	1.52143	8.78e-08	Up	1.28e-08	aspartic proteinase A2 [Brassica oleracea var. oleracea]
	LOC106324053	1.45	4.15	1.51706	0.000239	Up	5.74e-05	ras-related protein RABA1d [Brassica oleracea var. oleracea]
	LOC106336341	5.88	16.77	1.51199	7.87e-11	Up	8.51e-12	probable histone H2A variant 2 [Brassica oleracea var. oleracea]
	LOC106327563	0.67	1.91	1.51134	5.31e-07	Up	8.51e-08	DNA mismatch repair protein MSH7 [Brassica oleracea var. oleracea]
	LOC106311502	1.35	3.84	1.50815	1.2e-06	Up	2.01e-07	tricyclene synthase, chloroplastic-like isoform X2 [Brassica napus]
	LOC106311363	82.9	235.77	1.50794	0	Up	0	inositol-3-phosphate synthase [Brassica oleracea var. oleracea]
	LOC106328324	21.84	62.11	1.50785	4.36e-70	Up	7.13e-72	putative inactive flavonol synthase 2 [Brassica oleracea var. oleracea]
	LOC106342476	0.98	2.78	1.50423	0.000195	Up	4.62e-05	glutamine synthetase cytosolic isozyme 1-3-like [Brassica oleracea var. oleracea]
	LOC106310474	1.25	3.54	1.50182	0.0009	Up	0.000241	5'-3' exoribonuclease 4-like [Brassica oleracea var. oleracea]
	LOC106300639	8.48	24	1.5009	1.36e-55	Up	2.94e-57	phenylalanine ammonia-lyase 2-like [Brassica oleracea var. oleracea]
	LOC106298850	1.35	3.81	1.49683	0.000375	Up	9.32e-05	nuclear transcription factor Y subunit A-5-like isoform X1 [Brassica oleracea var. oleracea]
	LOC106333286	5.15	14.53	1.49639	4.5e-13	Up	4.07e-14	ethylene-responsive transcription factor 12-like [Brassica oleracea var. oleracea]
	LOC106342426	3.32	9.32	1.48915	4.41e-17	Up	3.08e-18	(6-4)DNA photolyase [Brassica oleracea var. oleracea]
	LOC106326808	13.32	37.12	1.4786	3.34e-37	Up	1.09e-38	annexin D2 [Brassica oleracea var. oleracea]
	LOC106315162	5.66	15.71	1.47281	5.33e-17	Up	3.75e-18	peroxidase 34 [Brassica napus]
	LOC106292925	23.7	65.62	1.46925	2.25e-53	Up	5.12e-55	ethylene-responsive transcription factor RAP2-3 isoform X2 [Brassica oleracea var. oleracea]
	LOC106344377	7.04	19.43	1.46464	2.37e-46	Up	6.19e-48	RNA-dependent RNA polymerase 1-like [Brassica oleracea var. oleracea]
	LOC106319296	0.63	1.73	1.45735	0.000218	Up	5.2e-05	putative pentatricopeptide repeat-containing protein At3g16890, mitochondrial [Brassica oleracea var. oleracea]
	LOC106310131	2.65	7.23	1.448	1.3e-18	Up	8.29e-20	CDX69166.1|//BnaC01g02870D [Brassica napus]
	LOC106337233	15.98	43.55	1.4464	9.41e-38	Up	3.03e-39	osmotin-like protein [Brassica napus]
	LOC106335052	3.19	8.66	1.44081	9.41e-26	Up	4.29e-27	probable LRR receptor-like serine/threonine-protein kinase RFK1 [Brassica oleracea var. oleracea]
	LOC106339571	3.43	9.29	1.43747	5.66e-08	Up	8.09e-09	thiocyanate methyltransferase 1 isoform X1 [Brassica napus]
	LOC106312090	7.08	19.17	1.43703	5.99e-39	Up	1.88e-40	auxin response factor 18 [Brassica oleracea var. oleracea]
	LOC106319166	35.46	95.97	1.43639	5.1e-122	Up	4.7e-124	formate dehydrogenase, mitochondrial [Brassica oleracea var. oleracea]
	LOC106321340	12.44	33.64	1.43519	2.48e-40	Up	7.45e-42	UDP-arabinopyranose mutase 2 [Brassica oleracea var. oleracea]
	LOC106295437	30.56	82.45	1.43188	1.32e-93	Up	1.61e-95	annexin D1 [Brassica oleracea var. oleracea]
	LOC106321362	1.03	2.75	1.41679	0.000115	Up	2.61e-05	hypothetical protein AALP_AA2G120600 [Arabis alpina]
	LOC106311693	12.43	33.17	1.41605	1.72e-19	Up	1.04e-20	CDX73471.1|//BnaC08g25320D [Brassica napus]
	LOC106318077	3	7.96	1.40781	8.98e-20	Up	5.36e-21	probable glucan 1,3-alpha-glucosidase [Brassica oleracea var. oleracea]
	LOC106343126	7.72	20.44	1.40472	8.72e-10	Up	1.03e-10	gibberellin-regulated protein 9 [Brassica oleracea var. oleracea]
	LOC106301630	2.97	7.86	1.40407	1.58e-09	Up	1.92e-10	transcription factor MYB28-like [Brassica oleracea var. oleracea]
	LOC106307290	135.34	358.13	1.40389	1.1e-210	Up	5.5e-213	uncharacterized protein LOC106382341 [Brassica napus]
	LOC106335297	6.1	16.1	1.40018	3.3e-32	Up	1.24e-33	heat shock 70 kDa protein 9, mitochondrial [Brassica oleracea var. oleracea]
	LOC106307564	5.37	14.15	1.39781	1.83e-17	Up	1.25e-18	nucleosome assembly protein 1;2-like [Brassica oleracea var. oleracea]
	LOC106334440	10.49	27.59	1.39513	2.58e-30	Up	1.01e-31	UDP-arabinopyranose mutase 2 [Brassica oleracea var. oleracea]
	LOC106294305	7.53	19.73	1.38967	1.99e-20	Up	1.15e-21	nitrile-specifier protein 5 [Brassica oleracea var. oleracea]
	LOC106328916	2.47	6.45	1.38479	2.05e-10	Up	2.29e-11	auxin transporter-like protein 2 [Brassica oleracea var. oleracea]
	LOC106328226	168.77	439.3	1.38015	0	Up	0	glutathione S-transferase F9 [Brassica rapa]
	LOC106320432	39.8	103.21	1.37474	1.8e-152	Up	1.3e-154	LOW QUALITY PROTEIN: (E,E)-geranyllinalool synthase-like [Brassica oleracea var. oleracea]
	LOC106320000	2.8	7.26	1.37454	5.42e-05	Up	1.17e-05	probable disease resistance protein At1g12280 [Brassica oleracea var. oleracea]
	LOC106327111	2.67	6.88	1.36557	3.68e-28	Up	1.54e-29	TMV resistance protein N-like isoform X1 [Brassica oleracea var. oleracea]
	LOC106312678	8.58	22.08	1.36369	2.65e-24	Up	1.28e-25	fructose-bisphosphate aldolase, cytoplasmic isozyme-like [Brassica oleracea var. oleracea]
	LOC106329116	4.19	10.78	1.36333	4.6e-20	Up	2.71e-21	DNA replication licensing factor MCM7 [Brassica oleracea var. oleracea]
	LOC106292531	13.47	34.61	1.36144	7.38e-22	Up	3.98e-23	reactive Intermediate Deaminase A, chloroplastic-like, partial [Brassica oleracea var. oleracea]
	LOC106337504	0.95	2.44	1.36088	7.61e-05	Up	1.68e-05	CDX95315.1|//BnaC04g28430D [Brassica napus]
	LOC106324787	1.93	4.95	1.35883	7.2e-07	Up	1.18e-07	transaldolase-like [Brassica oleracea var. oleracea]
	LOC106322919	45.44	116.18	1.35433	1.7e-99	Up	1.9e-101	mitogen-activated protein kinase kinase 9 [Brassica oleracea var. oleracea]
	LOC106306615	9.45	24.13	1.35244	9.35e-17	Up	6.68e-18	cold-regulated 413 plasma membrane protein 1-like [Brassica oleracea var. oleracea]
	LOC106331716	2.04	5.19	1.34716	5.29e-06	Up	9.68e-07	RING-H2 finger protein ATL51-like [Brassica oleracea var. oleracea]
	LOC106303947	9.03	22.97	1.34695	9.57e-22	Up	5.19e-23	cyclin-dependent kinase B2-2 [Brassica rapa]
	LOC106292845	2.06	5.21	1.33864	2.53e-05	Up	5.14e-06	auxin-responsive protein IAA12 [Brassica oleracea var. oleracea]
	LOC106294837	1.76	4.45	1.33823	0.000341	Up	8.44e-05	auxin-responsive protein IAA29 isoform X2 [Brassica oleracea var. oleracea]
	LOC106292560	26.5	66.96	1.33731	1.94e-50	Up	4.66e-52	thaumatin-like protein [Brassica oleracea var. oleracea]
	LOC106301197	0.76	1.92	1.33703	2.22e-06	Up	3.85e-07	DNA mismatch repair protein MLH3 isoform X2 [Brassica oleracea var. oleracea]
	LOC106306196	0.96	2.42	1.3339	1.45e-05	Up	2.85e-06	probable LRR receptor-like serine/threonine-protein kinase At2g02780 [Brassica oleracea var. oleracea]
	LOC106301729	5.78	14.57	1.33386	2.82e-22	Up	1.49e-23	aspartate--tRNA ligase 2, cytoplasmic-like [Brassica oleracea var. oleracea]
	LOC106342715	21.93	55.24	1.33281	7.17e-56	Up	1.54e-57	heptahelical transmembrane protein 2 [Brassica oleracea var. oleracea]
	LOC106334738	2.36	5.92	1.32681	9.93e-08	Up	1.46e-08	SNF1-related protein kinase catalytic subunit alpha KIN10-like isoform X1 [Brassica oleracea var. oleracea]
	LOC106331844	7.73	19.31	1.32081	1.48e-17	Up	1e-18	septum-promoting GTP-binding protein 1-like [Brassica oleracea var. oleracea]
	LOC106309789	58.77	146.6	1.31873	3.8e-120	Up	3.5e-122	protein TIFY 11A-like [Brassica oleracea var. oleracea]
	LOC106312427	2.92	7.28	1.31797	4.01e-12	Up	3.88e-13	auxin transporter-like protein 2 [Brassica oleracea var. oleracea]
	LOC106329409	3.51	8.74	1.31616	9.78e-12	Up	9.77e-13	chromatin assembly factor 1 subunit FAS2 [Brassica oleracea var. oleracea]
	LOC106309965	2.63	6.54	1.31423	0.000401	Up	0.000101	universal stress protein A-like protein [Brassica oleracea var. oleracea]
	LOC106319864	10.51	26.11	1.31284	1.41e-18	Up	9.04e-20	uncharacterized protein YwbO [Brassica oleracea var. oleracea]
	LOC106306241	106.25	263.93	1.31269	0	Up	0	cytochrome P450 81D11 [Brassica oleracea var. oleracea]
	LOC106342707	63.27	157.12	1.31227	8.7e-216	Up	4.2e-218	reticuline oxidase-like protein [Brassica oleracea var. oleracea]
	LOC106302779	124.97	310.25	1.31185	0	Up	0	cytochrome P450 79B1 [Brassica oleracea var. oleracea]
	LOC106295911	40.6	100.78	1.31166	6.9e-105	Up	7.4e-107	glutamine synthetase cytosolic isozyme 1-3 [Brassica napus]
	LOC106313607	2.33	5.78	1.31074	1.39e-07	Up	2.07e-08	glutamate dehydrogenase 2 [Brassica oleracea var. oleracea]
	LOC106301587	0.5	1.24	1.31034	3.35e-07	Up	5.25e-08	separase [Brassica oleracea var. oleracea]
	LOC106303729	4.71	11.68	1.31024	3.85e-13	Up	3.46e-14	heat stress transcription factor B-1-like [Brassica oleracea var. oleracea]
	LOC106342187	189.61	468.7	1.30563	0	Up	0	glutathione S-transferase F9 [Brassica oleracea var. oleracea]
	LOC106310363	53.74	132.74	1.30454	1.23e-49	Up	3.01e-51	10 kDa chaperonin-like [Brassica oleracea var. oleracea]
	LOC106327616	1.5	3.7	1.30256	5.99e-06	Up	1.11e-06	protein disulfide isomerase-like 1-4 [Brassica oleracea var. oleracea]
	LOC106335724	2.41	5.94	1.30143	3.01e-07	Up	4.68e-08	uncharacterized protein LOC106335724 [Brassica oleracea var. oleracea]
	LOC106303690	5.78	14.21	1.29777	8.99e-14	Up	7.7e-15	L-lactate dehydrogenase B-like [Brassica oleracea var. oleracea]
	LOC106307684	7.69	18.89	1.29657	1.26e-10	Up	1.38e-11	glycine-rich RNA-binding protein GRP1A isoform X1 [Brassica oleracea var. oleracea]
	LOC106300329	7.45	18.28	1.29495	7.82e-17	Up	5.57e-18	cyclin-dependent kinase B2-1 [Brassica oleracea var. oleracea]
	LOC106335387	3.93	9.62	1.29151	4e-24	Up	1.95e-25	staphylococcal nuclease domain-containing protein 1 [Brassica oleracea var. oleracea]
	LOC106306155	11.16	27.2	1.28527	3.5e-57	Up	7.31e-59	phospholipase D delta-like [Brassica oleracea var. oleracea]
	LOC106327140	1.93	4.7	1.28406	0.000105	Up	2.37e-05	heptahelical transmembrane protein 1-like [Brassica oleracea var. oleracea]
	LOC106323866	9.35	22.73	1.28156	1.02e-28	Up	4.21e-30	UDP-glycosyltransferase 84A2-like [Brassica oleracea var. oleracea]
	LOC106307758	5.31	12.86	1.27611	8.26e-13	Up	7.61e-14	aldo-keto reductase family 4 member C11 [Brassica oleracea var. oleracea]
	LOC106337254	0.76	1.84	1.27563	2.24e-05	Up	4.51e-06	histone-lysine N-methyltransferase ATX1 isoform X1 [Brassica oleracea var. oleracea]
	LOC106331739	17.79	43.03	1.27428	2.62e-16	Up	1.92e-17	protein NIM1-INTERACTING 1 [Brassica oleracea var. oleracea]
	LOC106337498	2.3	5.56	1.27345	1.72e-07	Up	2.61e-08	protein ABSCISIC ACID-INSENSITIVE 5 [Brassica oleracea var. oleracea]
	LOC106309564	28.76	69.45	1.27191	1.34e-43	Up	3.71e-45	glutathione S-transferase DHAR1, mitochondrial-like [Brassica oleracea var. oleracea]
	LOC106295626	6.45	15.54	1.26862	1.35e-32	Up	4.97e-34	receptor like protein kinase S.2 [Brassica oleracea var. oleracea]
	LOC106294572	1.08	2.59	1.26192	0.000206	Up	4.88e-05	3-ketoacyl-CoA synthase 1 [Brassica oleracea var. oleracea]
	LOC106337314	1.61	3.86	1.26154	5.36e-05	Up	1.15e-05	methyltransferase-like protein 16 isoform X2 [Brassica oleracea var. oleracea]
	LOC106311644	1	2.39	1.25701	1.02e-05	Up	1.95e-06	serine/threonine-protein kinase ATM-like [Brassica oleracea var. oleracea]
	LOC106292798	6.83	16.32	1.25668	5.33e-12	Up	5.22e-13	myb-relatedprotein Myb4-like [Brassica napus]
	LOC106318966	39.23	93.66	1.25548	2.6e-129	Up	2.2e-131	probable indole-3-acetic acid-amido synthetase GH3.5 [Brassica oleracea var. oleracea]
	LOC106336519	1.97	4.7	1.25446	2.72e-12	Up	2.59e-13	protein CHROMATIN REMODELING 24 [Brassica oleracea var. oleracea]
	LOC106301973	3.07	7.31	1.25163	1.41e-08	Up	1.88e-09	protein MID1-COMPLEMENTING ACTIVITY 1-like [Brassica oleracea var. oleracea]
	LOC106306335	5.4	12.84	1.24961	5.24e-15	Up	4.14e-16	tubulin beta-9 chain-like [Brassica oleracea var. oleracea]
	LOC106317096	2.05	4.87	1.2483	4.59e-07	Up	7.3e-08	4-substituted benzoates-glutamate ligase GH3.12-like [Brassica oleracea var. oleracea]
	LOC106319005	13	30.84	1.24629	8.13e-56	Up	1.75e-57	diacylglycerol kinase 2 [Brassica oleracea var. oleracea]
	LOC106334983	1.59	3.77	1.24554	8.03e-06	Up	1.51e-06	casein kinase I-like [Brassica oleracea var. oleracea]
	LOC106295496	33.02	78.28	1.2453	1.99e-53	Up	4.5e-55	uncharacterized protein LOC106295496 [Brassica oleracea var. oleracea]
	LOC106313401	6.08	14.41	1.24493	1.7e-15	Up	1.31e-16	fe(2+) transport protein 3, chloroplastic [Brassica oleracea var. oleracea]
	LOC106305604	1.11	2.63	1.2445	1.19e-07	Up	1.76e-08	probable WRKY transcription factor 19 isoform X2 [Brassica oleracea var. oleracea]
	LOC106306745	10.95	25.94	1.24425	2.54e-46	Up	6.66e-48	BTB/POZ domain-containing protein At5g66560 [Brassica oleracea var. oleracea]
	LOC106337606	1.88	4.44	1.23983	4.62e-06	Up	8.38e-07	A/G-specific adenine DNA glycosylase isoform X2 [Brassica oleracea var. oleracea]
	LOC106328580	3.76	8.87	1.2382	0.000156	Up	3.63e-05	uncharacterized protein LOC106328580 isoform X1 [Brassica oleracea var. oleracea]
	LOC106329505	25.17	59.32	1.23681	8.76e-71	Up	1.41e-72	CDX84830.1|//BnaA03g14000D [Brassica napus]
	LOC106330955	2.15	5.06	1.2348	1.77e-11	Up	1.82e-12	calcium-transporting ATPase 2, plasma membrane-type-like [Brassica oleracea var. oleracea]
	LOC106328024	4.36	10.26	1.23463	1.38e-14	Up	1.12e-15	chaperonin CPN60, mitochondrial [Brassica oleracea var. oleracea]
	LOC106334557	2.96	6.96	1.23349	2.74e-08	Up	3.77e-09	DEAD-box ATP-dependent RNA helicase 2-like [Brassica rapa]
	LOC106315525	3.89	9.1	1.2261	7.98e-09	Up	1.03e-09	transcription factor DIVARICATA [Brassica oleracea var. oleracea]
	LOC106306040	3.8	8.87	1.22294	4.95e-12	Up	4.83e-13	protein phosphatase 2C 56-like [Brassica oleracea var. oleracea]
	LOC106310361	4.49	10.44	1.21733	1.49e-12	Up	1.4e-13	selenium-binding protein 1-like isoform X2 [Brassica oleracea var. oleracea]
	LOC106335243	2.19	5.09	1.21673	1.42e-09	Up	1.71e-10	beta-galactosidase 10 [Brassica oleracea var. oleracea]
	LOC106328110	7.59	17.64	1.21668	2.04e-16	Up	1.49e-17	UDP-arabinopyranose mutase 1-like [Brassica oleracea var. oleracea]
	LOC106329034	5.78	13.39	1.21202	5.12e-08	Up	7.29e-09	cold shock protein 2-like [Brassica oleracea var. oleracea]
	LOC106297065	0.57	1.32	1.2115	0.000733	Up	0.000193	protein BREAST CANCER SUSCEPTIBILITY 2 homolog B-like [Brassica oleracea var. oleracea]
	LOC106300878	47.07	108.97	1.21105	2e-123	Up	1.8e-125	IAA-amino acid hydrolase ILR1-like 4 [Brassica oleracea var. oleracea]
	LOC106300593	4.92	11.39	1.21104	1.04e-09	Up	1.25e-10	formamidopyrimidine-DNA glycosylase isoform X2 [Brassica oleracea var. oleracea]
	LOC106309708	44.43	102.65	1.20813	6.31e-69	Up	1.05e-70	ng cell nuclear antigen [Brassica napus]
	LOC106306798	2.32	5.36	1.20811	1.54e-11	Up	1.56e-12	auxin response factor 5-like [Brassica oleracea var. oleracea]
	LOC106319482	1.53	3.53	1.20614	0.000213	Up	5.07e-05	CDY30325.1|//BnaA09g09520D [Brassica napus]
	LOC106301907	12.83	29.56	1.20412	2.62e-28	Up	1.09e-29	nudix hydrolase 8 [Brassica oleracea var. oleracea]
	LOC106336537	2.13	4.89	1.19898	1.13e-06	Up	1.89e-07	NAC domain-containing protein 53 [Brassica oleracea var. oleracea]
	LOC106336364	4.39	10.07	1.19777	2.71e-15	Up	2.11e-16	leucine-rich repeat receptor-like protein kinase PXC1 [Brassica oleracea var. oleracea]
	LOC106312404	6.28	14.39	1.19623	1.2e-26	Up	5.3e-28	DNA ligase 1-like [Brassica oleracea var. oleracea]
	LOC106329108	1.83	4.19	1.19511	0.000347	Up	8.59e-05	homeobox-leucine zipper protein ATHB-16-like [Brassica oleracea var. oleracea]
	LOC106306711	8.77	20.07	1.19439	7.1e-24	Up	3.5e-25	protein COBRA [Brassica oleracea var. oleracea]
	LOC106315998	5.03	11.49	1.19175	1.24e-08	Up	1.65e-09	ras-related protein RABC2a [Brassica oleracea var. oleracea]
	LOC106342198	23.87	54.43	1.1892	1.68e-49	Up	4.13e-51	MYB transcription factor 91-2 [Brassica napus]
	LOC106304268	1.73	3.94	1.18742	0.000997	Up	0.000269	GATA transcription factor 9-like [Brassica oleracea var. oleracea]
	LOC106309716	18.02	40.96	1.18462	6.08e-20	Up	3.6e-21	E3 ubiquitin-protein ligase RHA1B [Brassica oleracea var. oleracea]
	LOC106306928	9.83	22.34	1.18437	8.02e-33	Up	2.93e-34	CDY30787.1|//BnaC07g16870D [Brassica napus]
	LOC106292887	4.16	9.45	1.18373	2.79e-05	Up	5.7e-06	glycine-rich cell wall structural protein-like [Brassica napus]
	LOC106324714	52.38	118.92	1.1829	1.69e-85	Up	2.26e-87	protein TIFY 10B-like [Brassica oleracea var. oleracea]
	LOC106318288	201.18	456.24	1.18131	0	Up	0	S-adenosylmethionine synthase [Brassica oleracea var. oleracea]
	LOC106316620	9.67	21.91	1.18	9.41e-18	Up	6.29e-19	prohibitin-1, mitochondrial [Brassica rapa]
	LOC106296630	103.2	233.7	1.17921	3.1e-144	Up	2.3e-146	bark lectin isoform 2-like [Brassica oleracea var. oleracea]
	LOC106313668	4.61	10.43	1.1779	1.56e-07	Up	2.35e-08	prohibitin-4, mitochondrial [Brassica rapa]
	LOC106296929	26.64	60.21	1.17641	8.59e-36	Up	2.9e-37	ferritin-3, chloroplastic [Brassica oleracea var. oleracea]
	LOC106307754	22.41	50.48	1.17157	5.72e-41	Up	1.69e-42	annexin D1-like [Brassica oleracea var. oleracea]
	LOC106342601	2.61	5.87	1.16931	1.32e-08	Up	1.75e-09	cationic amino acid transporter 3, mitochondrial [Brassica oleracea var. oleracea]
	LOC106309549	3.04	6.83	1.16781	9.36e-07	Up	1.55e-07	lipid phosphate phosphatase 2 [Brassica oleracea var. oleracea]
	LOC106315774	8.36	18.78	1.16762	7.18e-10	Up	8.44e-11	nascent polypeptide-associated complex subunit alpha-like protein 3 [Brassica oleracea var. oleracea]
	LOC106301877	43.38	97.08	1.16214	6.26e-70	Up	1.03e-71	homeobox-leucine zipper protein HAT2 [Brassica oleracea var. oleracea]
	LOC106334550	1.61	3.6	1.16094	0.000392	Up	9.79e-05	BTB/POZ and TAZ domain-containing protein 4 [Brassica oleracea var. oleracea]
	LOC106298429	24.06	53.79	1.1607	9.25e-34	Up	3.32e-35	protein TIFY 10B-like isoform X1 [Brassica oleracea var. oleracea]
	LOC106336117	111.46	248.16	1.15474	2.5e-219	Up	1.2e-221	CDY07636.1|//BnaA03g18750D [Brassica napus]
	LOC106295922	5.48	12.2	1.15463	2.95e-08	Up	4.08e-09	E3 ubiquitin-protein ligase RNF4 [Brassica oleracea var. oleracea]
	LOC106335377	1.92	4.27	1.15313	4.35e-09	Up	5.48e-10	DNA mismatch repair protein MSH2 [Brassica oleracea var. oleracea]
	LOC106296339	3.85	8.56	1.15275	0.000114	Up	2.59e-05	histone H2A variant 1 [Brassica oleracea var. oleracea]
	LOC106328174	30.35	67.42	1.15148	4.38e-66	Up	7.7e-68	ultraviolet-B receptor UVR8 [Brassica oleracea var. oleracea]
	LOC106332038	1.73	3.84	1.15033	4.84e-05	Up	1.03e-05	protein TRANSPARENT TESTA 12-like [Brassica oleracea var. oleracea]
	LOC106302059	6.71	14.89	1.14996	3e-14	Up	2.49e-15	growth-regulating factor 2-like [Brassica oleracea var. oleracea]
	LOC106313677	2.82	6.25	1.14816	5.45e-09	Up	6.96e-10	crossover junction endonuclease MUS81 [Brassica oleracea var. oleracea]
	LOC106324723	2.16	4.78	1.14598	0.000135	Up	3.11e-05	flavonol synthase/flavanone 3-hydroxylase-like [Brassica oleracea var. oleracea]
	LOC106316163	0.52	1.15	1.14505	1.31e-05	Up	2.55e-06	separase-like [Brassica oleracea var. oleracea]
	LOC106315572	16.72	36.95	1.144	4.87e-16	Up	3.62e-17	copper transporter 5-like [Brassica oleracea var. oleracea]
	LOC106327648	3.48	7.69	1.1439	3.77e-16	Up	2.79e-17	leucine-rich repeat receptor-like protein kinase PXC2 [Brassica oleracea var. oleracea]
	LOC106343782	6.97	15.39	1.14276	7.49e-13	Up	6.87e-14	auxin-responsive protein IAA26 isoform X1 [Brassica rapa]
	LOC106331787	14.69	32.42	1.14205	2.16e-34	Up	7.58e-36	MATE efflux family protein 5-like [Brassica oleracea var. oleracea]
	LOC106303882	2.09	4.6	1.13813	0.000464	Up	0.000118	homeobox-leucine zipper protein HAT1 [Brassica oleracea var. oleracea]
	LOC106323095	1.82	4	1.13606	6.56e-05	Up	1.43e-05	probable serine/threonine-protein kinase At4g35230 [Brassica oleracea var. oleracea]
	LOC106339900	7.05	15.48	1.13471	3.68e-11	Up	3.86e-12	GATA transcription factor 2-like [Brassica oleracea var. oleracea]
	LOC106306097	2.62	5.75	1.134	4.49e-13	Up	4.05e-14	probable LRR receptor-like serine/threonine-protein kinase At4g36180 [Brassica oleracea var. oleracea]
	LOC106331861	2.95	6.47	1.13305	0.000151	Up	3.51e-05	phytochromobilin:ferredoxin oxidoreductase, chloroplastic-like isoform X2 [Brassica oleracea var. oleracea]
	LOC106301829	1.52	3.33	1.13145	0.000207	Up	4.92e-05	NAC domain-containing protein 8-like [Brassica oleracea var. oleracea]
	LOC106327191	6.12	13.36	1.12632	1.65e-09	Up	2.01e-10	26S proteasome non-ATPase regulatory subunit 14 homolog [Brassica oleracea var. oleracea]
	LOC106296747	2.53	5.5	1.12029	5.94e-09	Up	7.61e-10	chromatin assembly factor 1 subunit FAS1 [Brassica oleracea var. oleracea]
	LOC106295974	5.02	10.91	1.11989	1.57e-07	Up	2.36e-08	TIMELESS-interacting protein [Brassica oleracea var. oleracea]
	LOC106301647	8.33	18.1	1.1196	6.89e-13	Up	6.3e-14	prohibitin-4, mitochondrial [Brassica oleracea var. oleracea]
	LOC106300171	3.09	6.71	1.11871	1.79e-14	Up	1.47e-15	receptor-like protein kinase HSL1 [Brassica oleracea var. oleracea]
	LOC106320398	5.03	10.92	1.11834	7.97e-08	Up	1.16e-08	vesicle-associated membrane protein 711 [Brassica oleracea var. oleracea]
	LOC106317451	1.35	2.93	1.11794	3.62e-05	Up	7.54e-06	(E,E)-geranyllinalool synthase [Brassica oleracea var. oleracea]
	LOC106307536	10.84	23.48	1.11507	1.04e-21	Up	5.64e-23	chaperone protein dnaJ 10-like isoform X2 [Brassica oleracea var. oleracea]
	LOC106296142	1.1	2.38	1.11346	0.00016	Up	3.72e-05	U-box domain-containing protein 35 [Brassica oleracea var. oleracea]
	LOC106336995	5.81	12.57	1.11338	1.71e-10	Up	1.9e-11	protein DJ-1 homolog A-like [Brassica oleracea var. oleracea]
	LOC106336464	2.64	5.71	1.11295	1.07e-06	Up	1.78e-07	protein NUCLEAR FUSION DEFECTIVE 4-like [Brassica oleracea var. oleracea]
	LOC106335131	13.91	30.05	1.11124	3.35e-18	Up	2.19e-19	glycine-rich RNA-binding protein 10-like [Brassica napus]
	LOC106321534	2.89	6.24	1.11048	2.89e-13	Up	2.58e-14	RNA-dependent RNA polymerase 1 [Brassica oleracea var. oleracea]
	LOC106321648	7.67	16.53	1.10779	1.41e-15	Up	1.08e-16	glutamate dehydrogenase 2-like [Brassica oleracea var. oleracea]
	LOC106315442	3.1	6.68	1.10758	3.18e-05	Up	6.57e-06	rac-like GTP-binding protein ARAC10 isoform X1 [Brassica oleracea var. oleracea]
	LOC106337685	391.77	843.88	1.10703	5.9e-200	Up	3.1e-202	defensin-like protein 2 isoform X1 [Brassica oleracea var. oleracea]
	LOC106332384	9.22	19.86	1.10703	4.74e-07	Up	7.55e-08	elicitor peptide 1-like [Brassica oleracea var. oleracea]
	LOC106342291	26.04	56.02	1.10521	5.67e-24	Up	2.79e-25	CDY13216.1|//BnaC04g26190D [Brassica napus]
	LOC106314343	5.05	10.85	1.10334	2e-11	Up	2.06e-12	gamma-aminobutyrate transaminase POP2, mitochondrial-like [Brassica oleracea var. oleracea]
	LOC106312218	5.69	12.21	1.10156	1.74e-12	Up	1.64e-13	MATE efflux family protein 7-like [Brassica oleracea var. oleracea]
	LOC106297934	9.79	20.96	1.09826	1.07e-20	Up	6.05e-22	CBL-interacting serine/threonine-protein kinase 8 [Brassica oleracea var. oleracea]
	LOC106322077	11.77	25.17	1.09659	1.25e-09	Up	1.5e-10	AB hydrolase superfamily protein YfhM-like [Brassica oleracea var. oleracea]
	LOC106344020	25.31	54.11	1.09619	6.82e-34	Up	2.43e-35	superoxide dismutase [Cu-Zn] 1 [Brassica oleracea var. oleracea]
	LOC106335868	13.14	28.08	1.09558	1.26e-43	Up	3.51e-45	ribonucleoside-diphosphate reductase large subunit-like [Brassica oleracea var. oleracea]
	LOC106300118	4.92	10.48	1.09091	9.52e-05	Up	2.13e-05	multiprotein-bridging factor 1b-like [Brassica oleracea var. oleracea]
	LOC106312202	4.13	8.79	1.08972	2.63e-13	Up	2.33e-14	monosaccharide-sensing protein 1 [Brassica oleracea var. oleracea]
	LOC106320938	20.53	43.61	1.08692	2.52e-49	Up	6.26e-51	auxin response factor 18-like [Brassica oleracea var. oleracea]
	LOC106309611	99.53	211.24	1.08568	4.4e-136	Up	3.6e-138	putative lactoylglutathione lyase [Brassica oleracea var. oleracea]
	LOC106296398	2.57	5.45	1.08449	1.67e-07	Up	2.53e-08	auxin efflux carrier component 1-like [Brassica oleracea var. oleracea]
	LOC106321625	1.99	4.22	1.08448	2.15e-05	Up	4.33e-06	MLO-like protein 1 [Brassica napus]
	LOC106340122	311.9	658.78	1.07871	1.2e-194	Up	6.6e-197	defensin-like protein 2 [Brassica oleracea var. oleracea]
	LOC106318422	5.03	10.62	1.07815	1.37e-18	Up	8.74e-20	calmodulin-binding transcription activator 1 isoform X1 [Brassica oleracea var. oleracea]
	LOC106308421	220.81	465.73	1.07669	0	Up	0	peroxidase 42 [Brassica rapa]
	LOC106327034	20.26	42.69	1.07526	2.53e-37	Up	8.24e-39	UDP-glycosyltransferase 78D2-like [Brassica oleracea var. oleracea]
	LOC106317174	22.35	47.07	1.07453	1.8e-49	Up	4.44e-51	pectinesterase/pectinesterase inhibitor 3-like isoform X2 [Brassica oleracea var. oleracea]
	LOC106342431	6.34	13.34	1.0732	1.93e-24	Up	9.28e-26	auxin response factor 8 isoform X2 [Brassica oleracea var. oleracea]
	LOC106335596	27.98	58.84	1.0724	1.22e-45	Up	3.25e-47	thaumatin-like protein 1b [Brassica oleracea var. oleracea]
	LOC106295342	12.36	25.95	1.07006	1.43e-18	Up	9.18e-20	F-box protein 7 [Brassica oleracea var. oleracea]
	LOC106321319	1.83	3.84	1.06926	3.82e-05	Up	7.99e-06	multicopper oxidase LPR1 [Brassica oleracea var. oleracea]
	LOC106301662	11.2	23.49	1.06855	3.6e-21	Up	2e-22	AP2-like ethylene-responsive transcription factor TOE3 [Brassica oleracea var. oleracea]
	LOC106319097	1.55	3.25	1.06817	1.98e-05	Up	3.95e-06	auxin response factor 4 isoform X1 [Brassica oleracea var. oleracea]
	LOC106295799	6.74	14.13	1.06794	2.67e-09	Up	3.3e-10	14-3-3-like protein GF14 phi [Brassica oleracea var. oleracea]
	LOC106342220	2.03	4.25	1.06598	3.53e-10	Up	4.02e-11	ABC transporter B family member 1 [Brassica oleracea var. oleracea]
	LOC106296930	2.72	5.69	1.06482	3.39e-06	Up	6.02e-07	WD repeat-containing protein 76 [Brassica oleracea var. oleracea]
	LOC106306984	5.37	11.22	1.06308	6.5e-10	Up	7.59e-11	ABSCISIC ACID-INSENSITIVE 5-like protein 6 isoform X1 [Brassica oleracea var. oleracea]
	LOC106333855	19.88	41.53	1.06284	1.05e-39	Up	3.22e-41	UDP-glucosyl transferase 73B2-like isoform X2 [Brassica napus]
	LOC106309808	1.98	4.13	1.06064	0.000291	Up	7.1e-05	glutathione gamma-glutamylcysteinyltransferase 2 [Brassica oleracea var. oleracea]
	LOC106312180	146.94	306.25	1.05948	2.6e-279	Up	8.7e-282	cytochrome P450 83B1 [Brassica oleracea var. oleracea]
	LOC106329227	5.01	10.43	1.05786	9.76e-05	Up	2.19e-05	heme-binding-like protein At3g10130, chloroplastic [Brassica oleracea var. oleracea]
	LOC106336988	4.48	9.32	1.05683	5.3e-11	Up	5.64e-12	dynamin-related protein 1E-like isoform X3 [Brassica oleracea var. oleracea]
	LOC106314246	2.49	5.18	1.05681	5.25e-08	Up	7.48e-09	BTB/POZ domain-containing protein NPY1 [Brassica oleracea var. oleracea]
	LOC106304860	3.93	8.16	1.05404	4.43e-05	Up	9.38e-06	rac-like GTP-binding protein ARAC7 [Brassica oleracea var. oleracea]
	LOC106309713	3.39	7.03	1.05224	1.37e-07	Up	2.05e-08	cyclin-dependent kinase C-2-like [Brassica oleracea var. oleracea]
	LOC106313583	7.55	15.64	1.05069	8.99e-20	Up	5.37e-21	DNA replication licensing factor MCM7-like [Brassica oleracea var. oleracea]
	LOC106302084	0.84	1.74	1.05063	0.0005	Up	0.000128	DNA mismatch repair protein MSH3 [Brassica oleracea var. oleracea]
	LOC106300483	36.87	76.28	1.04886	6.87e-29	Up	2.8e-30	hypothetical protein CARUB_v10010503mg, partial [Capsella rubella]
	LOC106294904	1.66	3.43	1.04703	6.69e-05	Up	1.46e-05	mitogen-activated protein kinase kinase kinase ANP1 [Brassica oleracea var. oleracea]
	LOC106340690	2.95	6.09	1.04573	5.12e-05	Up	1.1e-05	peroxidase 63 [Brassica oleracea var. oleracea]
	LOC106315388	9.6	19.73	1.03929	4.66e-22	Up	2.49e-23	probable indole-3-acetic acid-amido synthetase GH3.1 [Brassica oleracea var. oleracea]
	LOC106306322	30.84	63.35	1.03854	1.63e-78	Up	2.37e-80	regulatory protein NPR3 [Brassica oleracea var. oleracea]
	LOC106295756	21.05	43.18	1.03654	1.17e-39	Up	3.59e-41	protein ASPARTIC PROTEASE IN GUARD CELL 1 [Brassica oleracea var. oleracea]
	LOC106328424	1.82	3.73	1.03524	2.72e-06	Up	4.76e-07	homeobox-leucine zipper protein ATHB-8 [Brassica oleracea var. oleracea]
	LOC106330719	16.82	34.46	1.03475	8.01e-07	Up	1.31e-07	hydrophobic protein RCI2B [Brassica rapa]
	LOC106313826	103.53	211.82	1.03279	1.1e-102	Up	1.2e-104	allene oxide cyclase 3, chloroplastic [Brassica oleracea var. oleracea]
	LOC106324492	1.18	2.41	1.03025	0.000226	Up	5.4e-05	LOW QUALITY PROTEIN: protein BREAST CANCER SUSCEPTIBILITY 1 homolog [Brassica oleracea var. oleracea]
	LOC106342621	39.85	81.26	1.02797	2.08e-40	Up	6.24e-42	probable peroxygenase 3 [Brassica oleracea var. oleracea]
	LOC106327881	1.42	2.89	1.02518	4.53e-05	Up	9.6e-06	probable leucine-rich repeat receptor-like protein kinase At5g49770 [Brassica oleracea var. oleracea]
	LOC106342833	16.32	33.21	1.02498	1.85e-23	Up	9.29e-25	fructose-bisphosphate aldolase, cytoplasmic isozyme-like [Brassica oleracea var. oleracea]
	LOC106294695	4.54	9.23	1.02364	3.45e-05	Up	7.16e-06	homologous-pairing protein 2 homolog [Brassica napus]
	LOC106294846	35.53	72.17	1.02236	3.54e-57	Up	7.4e-59	UDP-glycosyltransferase 74B1 [Brassica oleracea var. oleracea]
	LOC106303970	8.02	16.29	1.02231	3.19e-07	Up	4.97e-08	uncharacterized protein LOC106303970 isoform X1 [Brassica oleracea var. oleracea]
	LOC106328757	8.78	17.83	1.02201	4.99e-17	Up	3.5e-18	protein TRANSPARENT TESTA 12-like [Brassica oleracea var. oleracea]
	LOC106307587	4.24	8.6	1.02027	0.000173	Up	4.05e-05	proteasome subunit beta type-1 [Brassica rapa]
	LOC106312216	0.75	1.52	1.01911	0.000995	Up	0.000269	auxin response factor 19-like [Brassica oleracea var. oleracea]
	LOC106317937	2.84	5.74	1.01516	4.08e-06	Up	7.33e-07	CDY21554.1|//BnaC09g47380D [Brassica napus]
	LOC106335104	7.51	15.17	1.01434	8.63e-22	Up	4.68e-23	putative leucine-rich repeat-containing protein DDB_G0290503 [Brassica oleracea var. oleracea]
	LOC106321172	20.17	40.7	1.01282	1.7e-32	Up	6.28e-34	cytosolic isocitrate dehydrogenase [NADP] [Brassica oleracea var. oleracea]
	LOC106307075	4.57	9.21	1.01101	8.73e-14	Up	7.47e-15	ribonucleoside-diphosphate reductase large subunit [Brassica oleracea var. oleracea]
	LOC106330375	2.93	5.9	1.00981	8.24e-08	Up	1.2e-08	uncharacterized protein LOC106330375 [Brassica oleracea var. oleracea]
	LOC106337455	6.48	13.04	1.00888	1.98e-13	Up	1.74e-14	mini-chromosome maintenance complex-binding protein [Brassica oleracea var. oleracea]
	LOC106307480	60.28	121.29	1.00871	5.36e-46	Up	1.41e-47	ras-related protein RABA1b-like [Brassica rapa]
	LOC106336583	2.18	4.38	1.0066	0.000174	Up	4.07e-05	VAN3-binding protein [Brassica oleracea var. oleracea]
	LOC106307006	21.58	43.27	1.00367	1.38e-38	Up	4.35e-40	cytochrome P450 84A1 [Brassica oleracea var. oleracea]
	LOC106341951	5.04	10.1	1.00286	7.97e-06	Up	1.5e-06	CDX99131.1|//BnaA06g18220D [Brassica napus]
	LOC106300450	44.25	88.66	1.00261	6.48e-67	Up	1.13e-68	tubulin beta-1 chain [Brassica rapa]
	LOC106341756	6.3	12.62	1.00229	1.63e-07	Up	2.45e-08	aldo-keto reductase family 4 member C9 [Brassica oleracea var. oleracea]
	LOC106302219	3.55	7.1	1	3.64e-07	Up	5.73e-08	uncharacterized protein LOC106302219 [Brassica oleracea var. oleracea]
	LOC106327885	4.87	9.74	1	6.76e-15	Up	5.38e-16	DNA mismatch repair protein PMS1 isoform X4 [Brassica oleracea var. oleracea]
	LOC106312812	115.24	0.07	-10.685	0	Down	0	peptidyl-prolyl cis-trans isomerase CYP20-3, chloroplastic [Brassica oleracea var. oleracea]
	LOC106341094	3.32	0.01	-8.37504	4.99e-29	Down	2.02e-30	LOW QUALITY PROTEIN: metal tolerance protein 11 [Brassica oleracea var. oleracea]
	LOC106293434	3.25	0.01	-8.3443	3.95e-11	Down	4.16e-12	uncharacterized protein LOC103839067 [Brassica rapa]
	LOC106309689	2.89	0.01	-8.17493	9.74e-12	Down	9.71e-13	beta-amylase 5 [Brassica oleracea var. oleracea]
	LOC106309556	2.89	0.01	-8.17493	9.74e-12	Down	9.71e-13	beta-amylase 5 [Brassica oleracea var. oleracea]
	LOC106337944	2.34	0.01	-7.87036	8.48e-08	Down	1.24e-08	chlorophyll a-b binding protein CP26, chloroplastic-like [Brassica oleracea var. oleracea]
	LOC106320075	20.03	0.09	-7.79802	3.84e-65	Down	6.92e-67	thioredoxin Y2, chloroplastic [Brassica oleracea var. oleracea]
	LOC106342249	28.54	0.13	-7.77833	3.7e-247	Down	1.5e-249	L-type lectin-domain containing receptor kinase IV.1-like [Brassica oleracea var. oleracea]
	LOC106315065	35.62	0.18	-7.62855	5.99e-54	Down	1.34e-55	peptidyl-prolyl cis-trans isomerase CYP20-3, chloroplastic-like [Brassica oleracea var. oleracea]
	LOC106343317	1.7	0.01	-7.40939	1.05e-05	Down	2e-06	probable inactive leucine-rich repeat receptor-like protein kinase At3g03770 [Brassica oleracea var. oleracea]
	LOC106294056	1.59	0.01	-7.31288	6.73e-07	Down	1.09e-07	peroxidase 4 [Brassica oleracea var. oleracea]
	LOC106336366	1.26	0.01	-6.97728	4.92e-20	Down	2.9e-21	protein DA1-related 4-like isoform X1 [Brassica oleracea var. oleracea]
	LOC106326816	1.23	0.01	-6.94251	1.01e-15	Down	7.64e-17	disease resistance protein RPP5-like isoform X4 [Brassica oleracea var. oleracea]
	LOC106321668	1.04	0.01	-6.70044	5.3e-06	Down	9.69e-07	transcription factor PIF6 isoform X3 [Brassica oleracea var. oleracea]
	LOC106318433	0.77	0.01	-6.26679	1.18e-12	Down	1.1e-13	xanthine dehydrogenase 1-like [Brassica oleracea var. oleracea]
	LOC106337487	6.45	0.09	-6.16323	3.16e-57	Down	6.59e-59	flavonol synthase/flavanone 3-hydroxylase [Brassica oleracea var. oleracea]
	LOC106304105	0.63	0.01	-5.97728	1.05e-05	Down	2e-06	phosphate transporter PHO1 homolog 4 [Brassica oleracea var. oleracea]
	LOC106338875	0.77	0.02	-5.26679	7.69e-08	Down	1.11e-08	phenylalanine ammonia-lyase G4-like [Brassica oleracea var. oleracea]
	LOC106293160	0.34	0.01	-5.08746	5.3e-06	Down	9.69e-07	TMV resistance protein N-like [Brassica oleracea var. oleracea]
	LOC106322551	1.89	0.06	-4.97728	2.04e-08	Down	2.76e-09	CDY45741.1|//BnaC02g42410D [Brassica napus]
	LOC106300293	33.34	1.1	-4.92168	3.2e-124	Down	2.8e-126	aquaporin PIP2-1-like [Brassica oleracea var. oleracea]
	LOC106327600	11.43	0.49	-4.5439	1.31e-27	Down	5.59e-29	ubiquitin-conjugating enzyme E2 36-like [Brassica rapa]
	LOC106329628	1.07	0.05	-4.41954	6.7e-09	Down	8.64e-10	respiratory burst oxidase homolog protein A-like [Brassica oleracea var. oleracea]
	LOC106332035	25.36	1.28	-4.30834	1.02e-48	Down	2.56e-50	uncharacterized protein LOC106332035 [Brassica oleracea var. oleracea]
	LOC106325465	13.41	0.73	-4.19927	9.5e-26	Down	4.33e-27	protein AIG2-like [Brassica oleracea var. oleracea]
	LOC106343336	27.24	1.49	-4.19234	9.9e-149	Down	7.4e-151	glycerol-3-phosphate acyltransferase, chloroplastic isoform X2 [Brassica oleracea var. oleracea]
	LOC106316559	45.91	2.56	-4.16459	4.2e-125	Down	3.8e-127	zinc finger protein ZAT12-like [Brassica oleracea var. oleracea]
	LOC106313824	0.87	0.05	-4.12102	2.72e-05	Down	5.55e-06	probable receptor-like protein kinase At5g39030 [Brassica oleracea var. oleracea]
	LOC106325453	5.47	0.33	-4.051	1.92e-37	Down	6.23e-39	calcineurin B-like protein 4 isoform X1 [Brassica napus]
	LOC106315654	22.72	1.38	-4.04122	3.71e-63	Down	6.91e-65	tropinone reductase homolog At1g07440-like [Brassica oleracea var. oleracea]
	LOC106322987	12.9	0.82	-3.9756	1.24e-36	Down	4.11e-38	ethylene-responsive transcription factor ERF104-like [Brassica oleracea var. oleracea]
	LOC106328173	0.53	0.04	-3.72792	3.86e-06	Down	6.92e-07	disease resistance-like protein CSA1 [Brassica oleracea var. oleracea]
	LOC106340950	2.45	0.21	-3.54432	4.47e-05	Down	9.47e-06	uncharacterized N-acetyltransferase p20 [Brassica oleracea var. oleracea]
	LOC106329529	2.33	0.2	-3.54226	2.76e-07	Down	4.28e-08	peroxidase 47-like [Brassica oleracea var. oleracea]
	LOC106335867	3.24	0.28	-3.5325	3.73e-25	Down	1.74e-26	receptor-like protein kinase THESEUS 1 [Brassica oleracea var. oleracea]
	LOC106322680	50.08	4.37	-3.51853	1.7e-115	Down	1.6e-117	uncharacterized protein LOC106322680 [Brassica oleracea var. oleracea]
	LOC106333401	2.89	0.26	-3.47449	8.17e-05	Down	1.81e-05	calmodulin-like protein 6 isoform X1 [Brassica oleracea var. oleracea]
	LOC106335180	1.55	0.14	-3.46877	2.81e-06	Down	4.93e-07	receptor-like serine/threonine-protein kinase SD1-6 isoform X1 [Brassica oleracea var. oleracea]
	LOC106308216	1.06	0.1	-3.40599	0.000269	Down	6.53e-05	LOW QUALITY PROTEIN: BTB/POZ and TAZ domain-containing protein 2 [Brassica oleracea var. oleracea]
	LOC106331800	1.45	0.14	-3.37255	0.000149	Down	3.44e-05	abscisic acid receptor PYL4-like [Brassica oleracea var. oleracea]
	LOC106342302	70.56	7.35	-3.26303	2.3e-174	Down	1.4e-176	abscisic acid receptor PYL4 [Brassica oleracea var. oleracea]
	LOC106328219	1.47	0.16	-3.19967	3.34e-05	Down	6.92e-06	cytochrome P450 71B2-like isoform X2 [Brassica oleracea var. oleracea]
	LOC106296702	4.96	0.58	-3.09622	1.66e-20	Down	9.57e-22	DNA mismatch repair protein MSH2-like [Brassica oleracea var. oleracea]
	LOC106293661	5	0.6	-3.05889	2e-18	Down	1.29e-19	leucine-rich repeat receptor-like protein kinase PXC2 [Brassica oleracea var. oleracea]
	LOC106296328	4.28	0.53	-3.01355	2.71e-27	Down	1.17e-28	sister chromatid cohesion 1 protein 2-like isoform X2 [Brassica oleracea var. oleracea]
	LOC106337608	2.73	0.34	-3.00529	4.1e-10	Down	4.71e-11	cytochrome P450 71B2-like isoform X2 [Brassica oleracea var. oleracea]
	LOC106313108	6.22	0.81	-2.94092	1.33e-24	Down	6.38e-26	WRKY transcription factor 6 [Brassica oleracea var. oleracea]
	LOC106313766	8.14	1.07	-2.92742	1e-18	Down	6.38e-20	abscisic acid receptor PYL5 [Brassica oleracea var. oleracea]
	LOC106340059	2.74	0.37	-2.88858	1.09e-07	Down	1.61e-08	putative F-box protein At2g19630 [Brassica oleracea var. oleracea]
	LOC106292974	164.05	22.21	-2.88485	4.2e-199	Down	2.2e-201	late embryogenesis abundant protein Lea5 [Brassica oleracea var. oleracea]
	LOC106326242	8.35	1.17	-2.83527	3.4e-07	Down	5.33e-08	proteinase inhibitor PSI-1.2 [Brassica oleracea var. oleracea]
	LOC106316036	6.34	0.95	-2.73848	3.43e-10	Down	3.91e-11	uncharacterized protein LOC106316036 [Brassica oleracea var. oleracea]
	LOC106331795	2.03	0.32	-2.66534	0.000211	Down	5.02e-05	cold-regulated 413 plasma membrane protein 4 [Brassica rapa]
	LOC106301960	1.76	0.28	-2.65208	6.69e-07	Down	1.09e-07	tetrahydrocannabinolic acid synthase-like [Brassica oleracea var. oleracea]
	LOC106293382	8.18	1.33	-2.62067	2.97e-08	Down	4.11e-09	non-specific lipid-transfer protein 6 [Brassica oleracea var. oleracea]
	LOC106322586	164.49	26.9	-2.61232	0	Down	0	abscisic acid 8'-hydroxylase 3-like [Brassica oleracea var. oleracea]
	LOC106295900	13.66	2.26	-2.59556	9.41e-32	Down	3.54e-33	phytochromobilin:ferredoxin oxidoreductase, chloroplastic isoform X1 [Brassica oleracea var. oleracea]
	LOC106313611	3.9	0.65	-2.58496	4.02e-12	Down	3.89e-13	transcription factor TGA4 [Brassica oleracea var. oleracea]
	LOC106325438	1.36	0.23	-2.5639	0.00013	Down	2.98e-05	E3 ubiquitin-protein ligase ATL31-like [Brassica oleracea var. oleracea]
	LOC106323304	8.04	1.38	-2.54253	1.89e-36	Down	6.3e-38	probable L-type lectin-domain containing receptor kinase VI.1 [Brassica oleracea var. oleracea]
	LOC106339993	5.12	0.88	-2.54057	1.2e-11	Down	1.21e-12	probable WRKY transcription factor 46 isoform X2 [Brassica oleracea var. oleracea]
	LOC106300963	16.63	2.93	-2.50482	5.81e-56	Down	1.24e-57	glycerol kinase [Brassica oleracea var. oleracea]
	LOC106300025	8.21	1.47	-2.48157	4.39e-60	Down	8.6e-62	ABC transporter B family member 21 [Brassica oleracea var. oleracea]
	LOC106296916	1.97	0.36	-2.45213	4.65e-05	Down	9.9e-06	NAC domain-containing protein 18 isoform X1 [Brassica oleracea var. oleracea]
	LOC106328202	92.6	17.43	-2.40944	2.7e-218	Down	1.3e-220	BTB/POZ and TAZ domain-containing protein 1 [Brassica oleracea var. oleracea]
	LOC106341979	71.92	14.22	-2.33847	0	Down	0	LRR receptor-like serine/threonine-protein kinase FLS2 [Brassica oleracea var. oleracea]
	LOC106308087	25.83	5.14	-2.32921	1.54e-43	Down	4.3e-45	two-component response regulator ARR4-like [Brassica oleracea var. oleracea]
	LOC106322790	1.87	0.38	-2.29897	1.66e-05	Down	3.27e-06	uncharacterized protein LOC106322790 [Brassica oleracea var. oleracea]
	LOC106329520	1.57	0.32	-2.29462	9.86e-06	Down	1.88e-06	aspartic proteinase A3-like [Brassica oleracea var. oleracea]
	LOC106299912	9.25	1.93	-2.26085	2e-58	Down	4.1e-60	probable LRR receptor-like serine/threonine-protein kinase At1g74360 isoform X1 [Brassica oleracea var. oleracea]
	LOC106322094	5.16	1.17	-2.14086	0.00056	Down	0.000145	protein AIG2-like, partial [Brassica oleracea var. oleracea]
	LOC106309787	6.85	1.56	-2.13456	2.18e-09	Down	2.67e-10	cyclin-dependent kinase inhibitor 1 [Brassica oleracea var. oleracea]
	LOC106344187	2.19	0.5	-2.13093	3.28e-06	Down	5.83e-07	LOW QUALITY PROTEIN: DEAD-box ATP-dependent RNA helicase 34-like [Brassica oleracea var. oleracea]
	LOC106326341	135.95	31.38	-2.11516	1.6e-289	Down	5e-292	BTB/POZ and TAZ domain-containing protein 5-like [Brassica oleracea var. oleracea]
	LOC106301927	4.92	1.16	-2.08453	2.48e-18	Down	1.6e-19	long chain acyl-CoA synthetase 7, peroxisomal [Brassica oleracea var. oleracea]
	LOC106343287	52.32	12.4	-2.07702	4.7e-106	Down	4.9e-108	AP2/ERF and B3 domain-containing transcription repressor TEM1-like [Brassica oleracea var. oleracea]
	LOC106324854	29.22	6.93	-2.07603	1.65e-30	Down	6.41e-32	chaperone protein dnaJ 8, chloroplastic-like [Brassica napus]
	LOC106293588	8.4	2	-2.07039	5.44e-09	Down	6.94e-10	ethylene-responsive transcription factor 11-like [Brassica oleracea var. oleracea]
	LOC106324980	9.27	2.28	-2.02354	3.54e-12	Down	3.41e-13	uncharacterized protein LOC106324980 [Brassica oleracea var. oleracea]
	LOC106303939	27.27	6.81	-2.00159	5.27e-40	Down	1.59e-41	cold-regulated 413 plasma membrane protein 2-like [Brassica oleracea var. oleracea]
	LOC106301042	0.75	0.19	-1.98089	5.89e-08	Down	8.45e-09	acetyl-CoA carboxylase 1-like [Brassica oleracea var. oleracea]
	LOC106301024	137.13	34.75	-1.98046	0	Down	0	DNA-damage-repair/toleration protein DRT100-like [Brassica oleracea var. oleracea]
	LOC106326878	0.71	0.18	-1.97982	6.43e-05	Down	1.4e-05	disease resistance protein RML1A-like [Brassica oleracea var. oleracea]
	LOC106292302	2.68	0.68	-1.97863	1.29e-05	Down	2.51e-06	transcription factor SPATULA isoform X1 [Brassica oleracea var. oleracea]
	LOC106325830	4.78	1.22	-1.97013	3.54e-07	Down	5.55e-08	glutathione S-transferase U11-like [Brassica oleracea var. oleracea]
	LOC106342984	7.25	1.86	-1.96268	8.95e-20	Down	5.34e-21	beta-glucosidase 26, peroxisomal [Brassica rapa]
	LOC106327894	351.19	90.31	-1.95929	0	Down	0	probable WRKY transcription factor 40 [Brassica oleracea var. oleracea]
	LOC106337212	5.09	1.31	-1.9581	8.34e-07	Down	1.37e-07	glutathione S-transferase U7 [Brassica oleracea var. oleracea]
	LOC106305989	9.39	2.43	-1.95017	1.23e-15	Down	9.38e-17	probable WRKY transcription factor 53 [Brassica oleracea var. oleracea]
	LOC106327139	108.83	28.92	-1.91194	0	Down	0	probable galactinol--sucrose galactosyltransferase 6 [Brassica oleracea var. oleracea]
	LOC106293898	7.5	2.05	-1.87127	1.34e-10	Down	1.47e-11	putative gamma-glutamylcyclotransferase At3g02910 [Brassica oleracea var. oleracea]
	LOC106302014	4.03	1.11	-1.86022	0.000819	Down	0.000218	auxin-induced protein X15, partial [Brassica napus]
	LOC106294617	44.35	12.31	-1.8491	6.81e-56	Down	1.46e-57	two-component response regulator ARR4-like [Brassica oleracea var. oleracea]
	LOC106339988	22.99	6.43	-1.83812	3.55e-23	Down	1.8e-24	glutathione S-transferase U5 [Brassica oleracea var. oleracea]
	LOC106333415	3.94	1.11	-1.82764	2.28e-05	Down	4.61e-06	NAC domain-containing protein 90-like [Brassica oleracea var. oleracea]
	LOC106299969	182.7	51.55	-1.82543	0	Down	0	pyrophosphate-energized vacuolar membrane proton pump 1-like [Brassica oleracea var. oleracea]
	LOC106310993	4.39	1.24	-1.82388	1.87e-07	Down	2.84e-08	peroxidase 34-like [Brassica oleracea var. oleracea]
	LOC106325827	3.75	1.06	-1.82283	0.000638	Down	0.000166	F-box protein SNE [Brassica oleracea var. oleracea]
	LOC106327302	5.49	1.58	-1.79688	4.57e-12	Down	4.44e-13	glutathione gamma-glutamylcysteinyltransferase 1-like isoform X1 [Brassica oleracea var. oleracea]
	LOC106298315	339.93	98.52	-1.78675	0	Down	0	chaperone protein dnaJ 8, chloroplastic-like [Brassica oleracea var. oleracea]
	LOC106334961	98.88	28.9	-1.77461	6.6e-84	Down	9.13e-86	calmodulin-2/4-like [Brassica napus]
	LOC106329354	50.68	14.91	-1.76514	3.3e-111	Down	3.4e-113	uncharacterized protein LOC106329354 [Brassica oleracea var. oleracea]
	LOC106311537	9.9	2.92	-1.76146	1.47e-20	Down	8.41e-22	protein TRANSPARENT TESTA 12-like [Brassica oleracea var. oleracea]
	LOC106318580	97.02	28.73	-1.75572	0	Down	0	probable galactinol--sucrose galactosyltransferase 6 isoform X1 [Brassica oleracea var. oleracea]
	LOC106337038	14.36	4.29	-1.74301	1.56e-19	Down	9.41e-21	F-box protein PP2-A13 [Brassica oleracea var. oleracea]
	LOC106312194	0.95	0.29	-1.71187	4.07e-05	Down	8.55e-06	disease resistance-like protein CSA1 isoform X2 [Brassica oleracea var. oleracea]
	LOC106311933	114.81	35.51	-1.69295	0	Down	0	probable galactinol--sucrose galactosyltransferase 2 [Brassica oleracea var. oleracea]
	LOC106301313	4.61	1.43	-1.68875	1.31e-11	Down	1.33e-12	cysteine-rich receptor-like protein kinase 5 [Brassica oleracea var. oleracea]
	LOC106324892	39.42	12.25	-1.68615	2.77e-43	Down	7.74e-45	CBS domain-containing protein CBSX3, mitochondrial [Brassica oleracea var. oleracea]
	LOC106336369	1.51	0.47	-1.68382	7.19e-06	Down	1.34e-06	respiratory burst oxidase homolog protein C [Brassica oleracea var. oleracea]
	LOC106317026	1.56	0.49	-1.67069	0.000411	Down	0.000103	BTB/POZ domain-containing protein At3g19850 [Brassica oleracea var. oleracea]
	LOC106342200	54.4	17.2	-1.6612	1.1e-144	Down	8.5e-147	delta-1-pyrroline-5-carboxylate synthase B-like [Brassica oleracea var. oleracea]
	LOC106306537	8.03	2.55	-1.6549	3.24e-18	Down	2.11e-19	ferredoxin--nitrite reductase, chloroplastic [Brassica oleracea var. oleracea]
	LOC106317763	98.38	31.36	-1.64944	0	Down	0	chaperone protein ClpB3, chloroplastic-like [Brassica oleracea var. oleracea]
	LOC106293384	14.78	4.74	-1.64069	8.59e-22	Down	4.65e-23	probable protein phosphatase 2C 2 [Brassica oleracea var. oleracea]
	LOC106329092	3.93	1.29	-1.60716	1.77e-08	Down	2.38e-09	cationic amino acid transporter 6, chloroplastic [Brassica oleracea var. oleracea]
	LOC106329400	50.71	16.78	-1.59553	3.65e-74	Down	5.65e-76	protein DJ-1 homolog A-like [Brassica oleracea var. oleracea]
	LOC106300435	8.76	2.91	-1.58991	2.41e-26	Down	1.08e-27	chloride channel protein CLC-a [Brassica oleracea var. oleracea]
	LOC106298389	99.6	33.49	-1.57242	1.96e-91	Down	2.45e-93	abscisic acid receptor PYL9-like [Brassica oleracea var. oleracea]
	LOC106335457	4.23	1.43	-1.56464	0.00012	Down	2.73e-05	two-component response regulator ARR6 [Brassica rapa]
	LOC106312256	1.61	0.55	-1.54956	4.48e-05	Down	9.49e-06	pentatricopeptide repeat-containing protein At1g10270-like [Brassica oleracea var. oleracea]
	LOC106328566	19.31	6.62	-1.54445	2.68e-20	Down	1.56e-21	aquaporin PIP2-2-like [Brassica oleracea var. oleracea]
	LOC106307304	9.75	3.35	-1.54124	1.19e-10	Down	1.31e-11	21 kDa protein [Brassica oleracea var. oleracea]
	LOC106319627	33.4	11.5	-1.53821	1.52e-43	Down	4.22e-45	glutathionyl-hydroquinone reductase YqjG-like isoform X1 [Brassica oleracea var. oleracea]
	LOC106336452	8.1	2.79	-1.53766	1.87e-18	Down	1.2e-19	protein STRUBBELIG-RECEPTOR FAMILY 2-like [Brassica oleracea var. oleracea]
	LOC106302278	4.32	1.49	-1.53572	2.41e-07	Down	3.71e-08	E3 ubiquitin-protein ligase PUB22-like [Brassica oleracea var. oleracea]
	LOC106313574	2.29	0.79	-1.53542	0.000448	Down	0.000114	myb-related protein 306-like [Brassica oleracea var. oleracea]
	LOC106323463	11.11	3.84	-1.53268	0.000318	Down	7.81e-05	auxin-responsive protein SAUR32-like [Brassica oleracea var. oleracea]
	LOC106296619	7.95	2.75	-1.53152	4.69e-12	Down	4.56e-13	TMV resistance protein N-like [Brassica oleracea var. oleracea]
	LOC106312422	31.86	11.13	-1.51729	3.59e-17	Down	2.49e-18	uncharacterized protein LOC106312422 [Brassica oleracea var. oleracea]
	LOC106331451	113.83	39.88	-1.51314	8.18e-97	Down	9.5e-99	dof zinc finger protein DOF1.7-like [Brassica oleracea var. oleracea]
	LOC106342053	11.18	3.92	-1.51199	4.5e-23	Down	2.29e-24	leucine-rich repeat receptor-like serine/threonine/tyrosine-protein kinase SOBIR1 [Brassica oleracea var. oleracea]
	LOC106336684	34.22	12.03	-1.5082	1.55e-54	Down	3.45e-56	abscisic acid 8'-hydroxylase 2-like isoform X2 [Brassica oleracea var. oleracea]
	LOC106318938	73.7	26.2	-1.4921	4e-129	Down	3.4e-131	ferredoxin--nitrite reductase, chloroplastic-like [Brassica rapa]
	LOC106292441	6.41	2.28	-1.49129	7.53e-06	Down	1.41e-06	protein NDR1-like [Brassica oleracea var. oleracea]
	LOC106311734	38.7	13.79	-1.48871	1.19e-65	Down	2.11e-67	transcription factor SCREAM2-like [Brassica oleracea var. oleracea]
	LOC106301555	9.17	3.28	-1.48323	3.84e-15	Down	3.01e-16	ent-kaurene oxidase, chloroplastic [Brassica oleracea var. oleracea]
	LOC106332395	8.3	2.97	-1.48265	2.98e-06	Down	5.25e-07	cell wall / vacuolar inhibitor of fructosidase 2-like [Brassica oleracea var. oleracea]
	LOC106301884	62.27	22.47	-1.47054	3.92e-66	Down	6.87e-68	ethylene-responsive transcription factor ERF104 [Brassica oleracea var. oleracea]
	LOC106342987	55.69	20.23	-1.46092	1.69e-87	Down	2.21e-89	probable WRKY transcription factor 33 [Brassica oleracea var. oleracea]
	LOC106301629	57.48	20.92	-1.45818	3.82e-89	Down	4.87e-91	serine carboxypeptidase 24 [Brassica oleracea var. oleracea]
	LOC106342672	570.35	209.77	-1.44304	0	Down	0	ribulose bisphosphate carboxylase/oxygenase activase, chloroplastic-like isoform X2 [Brassica oleracea var. oleracea]
	LOC106344974	7.5	2.76	-1.44222	3.67e-11	Down	3.85e-12	U-box domain-containing protein 29-like [Brassica oleracea var. oleracea]
	LOC106328576	23.45	8.64	-1.44048	5.17e-51	Down	1.22e-52	probable galactinol--sucrose galactosyltransferase 1 isoform X1 [Brassica oleracea var. oleracea]
	LOC106331307	194.04	72.18	-1.42668	6.5e-300	Down	2e-302	WRKY protein [Brassica oleracea var. italica]
	LOC106335792	115.02	43.04	-1.41813	1.19e-91	Down	1.48e-93	probable peroxygenase 3 [Brassica oleracea var. oleracea]
	LOC106334483	12.07	4.54	-1.41066	5.05e-21	Down	2.83e-22	transcription factor SPATULA-like isoform X2 [Brassica oleracea var. oleracea]
	LOC106335139	2.68	1.01	-1.40788	7.8e-06	Down	1.47e-06	putative BTB/POZ domain-containing protein At3g08660 [Brassica oleracea var. oleracea]
	LOC106301939	29.2	11.07	-1.39931	1.41e-23	Down	7.03e-25	dof zinc finger protein DOF5.8 [Brassica oleracea var. oleracea]
	LOC106327965	3.38	1.3	-1.37851	0.000481	Down	0.000122	transcription factor DIVARICATA-like [Brassica oleracea var. oleracea]
	LOC106327440	73.27	28.26	-1.37446	7.8e-144	Down	6e-146	probably inactive leucine-rich repeat receptor-like protein kinase At5g48380 [Brassica oleracea var. oleracea]
	LOC106312418	28.83	11.13	-1.37312	1.14e-35	Down	3.88e-37	basic 7S globulin-like [Brassica oleracea var. oleracea]
	LOC106306877	3.88	1.5	-1.37109	2.1e-06	Down	3.63e-07	uncharacterized protein LOC106306877 [Brassica oleracea var. oleracea]
	LOC106337621	4.1	1.59	-1.3666	3.63e-06	Down	6.49e-07	abscisic acid 8'-hydroxylase 2 isoform X2 [Brassica oleracea var. oleracea]
	LOC106342808	58.13	22.65	-1.35977	6.06e-68	Down	1.03e-69	LOW QUALITY PROTEIN: cysteine synthase, chloroplastic/chromoplastic [Brassica oleracea var. oleracea]
	LOC106301311	3.72	1.45	-1.35925	9.82e-07	Down	1.63e-07	transcription factor PIF1 isoform X1 [Brassica oleracea var. oleracea]
	LOC106293021	187.27	73.43	-1.35068	2.4e-104	Down	2.6e-106	senescence-associated protein DIN1 isoform X1 [Brassica oleracea var. oleracea]
	LOC106318523	6.75	2.65	-1.3489	7.41e-09	Down	9.59e-10	maltose excess protein 1, chloroplastic-like [Brassica oleracea var. oleracea]
	LOC106301798	24.68	9.72	-1.34431	6.43e-25	Down	3.03e-26	heptahelical transmembrane protein 2-like [Brassica oleracea var. oleracea]
	LOC106302174	28.59	11.31	-1.33791	8.43e-33	Down	3.08e-34	CDY02159.1|//BnaA03g40080D [Brassica napus]
	LOC106306749	3.47	1.4	-1.30951	1.11e-10	Down	1.22e-11	disease resistance protein RRS1 isoform X2 [Brassica oleracea var. oleracea]
	LOC106342509	4.09	1.67	-1.29225	3.77e-08	Down	5.28e-09	probable cyclic nucleotide-gated ion channel 6 [Brassica oleracea var. oleracea]
	LOC106327996	20.79	8.51	-1.28866	7.31e-22	Down	3.94e-23	protein REVEILLE 1-like [Brassica oleracea var. oleracea]
	LOC106292818	305.34	125.01	-1.28837	1.6e-116	Down	1.5e-118	uncharacterized protein LOC106292818 [Brassica oleracea var. oleracea]
	LOC106329115	1.9	0.78	-1.28445	6.69e-05	Down	1.46e-05	probable LRR receptor-like serine/threonine-protein kinase At4g36180 [Brassica oleracea var. oleracea]
	LOC106313049	83.29	34.24	-1.28246	1.43e-72	Down	2.28e-74	probable WRKY transcription factor 53 [Brassica oleracea var. oleracea]
	LOC106335452	79.61	32.78	-1.28013	3.88e-42	Down	1.12e-43	autophagy-related protein 8e [Brassica oleracea var. oleracea]
	LOC106301710	284.62	117.41	-1.27748	1.6e-151	Down	1.2e-153	ethylene-responsive transcription factor 11-like [Brassica oleracea var. oleracea]
	LOC106328064	17.18	7.15	-1.26471	2.93e-20	Down	1.71e-21	GATA transcription factor 21-like [Brassica oleracea var. oleracea]
	LOC106309450	50.79	21.14	-1.26457	1.39e-77	Down	2.04e-79	MLO-like protein 2 [Brassica oleracea var. oleracea]
	LOC106296545	32.96	13.73	-1.26338	1.91e-30	Down	7.43e-32	putative methyltransferase DDB_G0268948 [Brassica oleracea var. oleracea]
	LOC106296243	26.28	10.95	-1.26303	1.57e-28	Down	6.52e-30	pyruvate dehydrogenase E1 component subunit alpha-2, mitochondrial-like isoform X2 [Brassica oleracea var. oleracea]
	LOC106334543	35.3	14.88	-1.24629	3.16e-49	Down	7.85e-51	asparagine--tRNA ligase, cytoplasmic 1-like [Brassica oleracea var. oleracea]
	LOC106336627	128.07	54.9	-1.22205	1.4e-125	Down	1.2e-127	nematode resistance protein-like HSPRO2 [Brassica oleracea var. oleracea]
	LOC106339337	6.55	2.82	-1.2158	1.48e-07	Down	2.21e-08	WRKY transcription factor [Brassica oleracea var. capitata]
	LOC106339985	5.54	2.4	-1.20685	0.000227	Down	5.43e-05	CDY47118.1|//BnaC04g13750D [Brassica napus]
	LOC106321812	15.68	6.82	-1.20108	3.4e-09	Down	4.24e-10	phenylalanine ammonia-lyase 2-like [Brassica oleracea var. oleracea]
	LOC106293052	13.86	6.08	-1.18878	2.18e-06	Down	3.78e-07	monothiol glutaredoxin-S13 [Brassica oleracea var. oleracea]
	LOC106334554	70.36	30.95	-1.18482	4.01e-97	Down	4.6e-99	leucine-rich repeat receptor-like serine/threonine/tyrosine-protein kinase SOBIR1 [Brassica oleracea var. oleracea]
	LOC106324351	31.62	13.92	-1.18368	5.64e-22	Down	3.02e-23	lectin-like protein LEC [Brassica oleracea var. oleracea]
	LOC106343395	16.57	7.42	-1.15908	6.8e-18	Down	4.51e-19	U-box domain-containing protein 29 [Brassica oleracea var. oleracea]
	LOC106296325	1.51	0.68	-1.15094	0.000745	Down	0.000196	putative disease resistance protein At4g11170 [Brassica oleracea var. oleracea]
	LOC106327338	10.85	4.9	-1.14684	2.19e-05	Down	4.42e-06	sucrose synthase 2-like [Brassica oleracea var. oleracea]
	LOC106327157	57.89	26.2	-1.14375	1.75e-40	Down	5.23e-42	SNF1-related protein kinase regulatory subunit beta-1-like isoform X3 [Brassica oleracea var. oleracea]
	LOC106308080	29.25	13.24	-1.14353	8.85e-19	Down	5.6e-20	protein PLANT CADMIUM RESISTANCE 2-like [Brassica oleracea var. oleracea]
	LOC106313510	6.02	2.73	-1.14086	5.25e-05	Down	1.13e-05	cytosolic sulfotransferase 12 [Brassica oleracea var. oleracea]
	LOC106306460	20.43	9.29	-1.13694	2.67e-11	Down	2.78e-12	peptide methionine sulfoxide reductase A4, chloroplastic-like [Brassica oleracea var. oleracea]
	LOC106307736	42.11	19.21	-1.13231	3.76e-45	Down	1.01e-46	casein kinase I isoform X2 [Brassica oleracea var. oleracea]
	LOC106315444	7.75	3.56	-1.12232	1.27e-08	Down	1.68e-09	probable disease resistance protein At1g63360 isoform X2 [Brassica oleracea var. oleracea]
	LOC106312604	81.68	37.63	-1.1181	4.9e-106	Down	5.2e-108	calcium-dependent protein kinase 32 [Brassica oleracea var. oleracea]
	LOC106303856	10.84	5.01	-1.11348	6.04e-08	Down	8.67e-09	ethylene-responsive transcription factor 5 [Brassica oleracea var. oleracea]
	LOC106337870	2.41	1.13	-1.09271	1.38e-06	Down	2.33e-07	disease resistance protein LAZ5-like [Brassica oleracea var. oleracea]
	LOC106301944	74.5	35.03	-1.08865	7.04e-57	Down	1.48e-58	lipid phosphate phosphatase 1 [Brassica oleracea var. oleracea]
	LOC106312359	42.33	19.91	-1.08819	1.21e-45	Down	3.2e-47	GDP-L-galactose phosphorylase 1-like [Brassica oleracea var. oleracea]
	LOC106342703	2.55	1.2	-1.08746	7.57e-05	Down	1.66e-05	chloride channel protein CLC-a [Brassica oleracea var. oleracea]
	LOC106336306	99.01	46.74	-1.08292	7.25e-80	Down	1.04e-81	E3 ubiquitin-protein ligase RING1-like [Brassica oleracea var. oleracea]
	LOC106312125	82	38.73	-1.08217	2.74e-81	Down	3.88e-83	sugar transporter ERD6 [Brassica oleracea var. oleracea]
	LOC106343941	14.35	6.79	-1.07957	2.85e-05	Down	5.84e-06	auxin-induced protein X15-like [Brassica oleracea var. oleracea]
	LOC106339373	50.56	23.99	-1.07556	2.04e-34	Down	7.16e-36	probable WRKY transcription factor 15 [Brassica oleracea var. oleracea]
	LOC106328720	47.2	22.4	-1.07529	2.56e-55	Down	5.57e-57	MACPF domain-containing protein NSL1-like [Brassica oleracea var. oleracea]
	LOC106339375	13.35	6.34	-1.07428	2.15e-06	Down	3.72e-07	copper transport protein CCH-like [Brassica napus]
	LOC106315891	14.61	6.94	-1.07395	1.74e-07	Down	2.63e-08	3-isopropylmalate dehydratase large subunit-like [Brassica oleracea var. oleracea]
	LOC106328153	15.57	7.41	-1.07122	9.58e-06	Down	1.82e-06	protein COLD-REGULATED 15B, chloroplastic-like [Brassica oleracea var. oleracea]
	LOC106331174	4.58	2.18	-1.07102	2.13e-08	Down	2.9e-09	vacuolar protein sorting-associated protein 53 A-like [Brassica oleracea var. oleracea]
	LOC106309709	26.86	12.79	-1.07044	1.12e-12	Down	1.04e-13	BON1-associated protein 1 [Brassica oleracea var. oleracea]
	LOC106300780	109.01	52.02	-1.06732	2e-101	Down	2.2e-103	DNA-damage-repair/toleration protein DRT100-like [Brassica oleracea var. oleracea]
	LOC106312708	23.32	11.19	-1.05936	6.56e-16	Down	4.91e-17	heptahelical transmembrane protein 3 [Brassica oleracea var. oleracea]
	LOC106317523	4.48	2.15	-1.05916	1.31e-08	Down	1.75e-09	probable disease resistance protein RXW24L [Brassica oleracea var. oleracea]
	LOC106337102	233.37	112.09	-1.05796	3.9e-129	Down	3.3e-131	calmodulin-binding protein 25-like [Brassica oleracea var. oleracea]
	LOC106307778	101.94	49.02	-1.05628	1.77e-61	Down	3.37e-63	uncharacterized protein LOC106307778 [Brassica oleracea var. oleracea]
	LOC106327931	197.51	95.03	-1.05547	6.08e-69	Down	1.01e-70	uncharacterized protein LOC106327931 [Brassica oleracea var. oleracea]
	LOC106328289	69.61	33.53	-1.05384	2.26e-57	Down	4.7e-59	U-box domain-containing protein 27 [Brassica oleracea var. oleracea]
	LOC106308197	120.71	58.28	-1.05047	1.54e-60	Down	2.97e-62	glutathione S-transferase U18-like [Brassica oleracea var. oleracea]
	LOC106295895	43.75	21.13	-1.04999	1.3e-55	Down	2.8e-57	protein LHY [Brassica oleracea var. oleracea]
	LOC106337201	9.9	4.8	-1.04439	5.33e-08	Down	7.6e-09	probable WRKY transcription factor 17 isoform X2 [Brassica oleracea var. oleracea]
	LOC106310266	12.41	6.02	-1.04367	8.79e-10	Down	1.04e-10	basic 7S globulin-like [Brassica oleracea var. oleracea]
	LOC106301593	4.91	2.39	-1.03871	0.000129	Down	2.96e-05	protein PHYTOCHROME KINASE SUBSTRATE 1-like [Brassica oleracea var. oleracea]
	LOC106342670	598.95	293.99	-1.02667	0	Down	0	CDY33684.1|//BnaC04g29670D [Brassica napus]
	LOC106310282	133.66	65.62	-1.02636	2.22e-70	Down	3.62e-72	plasma membrane-associated cation-binding protein 1 [Brassica oleracea var. oleracea]
	LOC106339323	125.34	61.6	-1.02484	3.3e-105	Down	3.5e-107	E3 ubiquitin-protein ligase PUB23 [Brassica oleracea var. oleracea]
	LOC106334969	585.37	287.79	-1.02433	0	Down	0	polyubiquitin-C-like [Vitis vinifera]
	LOC106296274	10.53	5.19	-1.0207	5.78e-12	Down	5.67e-13	alpha-dioxygenase 2-like [Brassica oleracea var. oleracea]
	LOC106293480	90.88	44.87	-1.01821	2.19e-26	Down	9.72e-28	uncharacterized protein LOC106293480 [Brassica oleracea var. oleracea]
	LOC106337376	6.98	3.45	-1.01663	1.65e-15	Down	1.26e-16	LOW QUALITY PROTEIN: cellulose synthase-like protein D3 [Brassica oleracea var. oleracea]
	LOC106298209	15.35	7.63	-1.00848	5.84e-07	Down	9.42e-08	transcription factor MYB1R1 [Brassica oleracea var. oleracea]
	LOC106341726	12105.2	6032.28	-1.00486	0	Down	0	chloroplast ribulose-1,5-bisphosphate carboxylase/oxygenase small subunit precursor [Brassica napus]
	LOC106329255	90.15	45.03	-1.00144	2.39e-60	Down	4.65e-62	mitogen-activated protein kinase 11 [Brassica oleracea var. oleracea]
DEGs involved in glycosinolate and sulfur compound synthetic and metabolic process	LOC106298401	0.08	7.85	6.61655	1.57e-46	Up	4.08e-48	cytochrome P450 81F1-like [Brassica oleracea var. oleracea]
	LOC106292913	0.06	4.54	6.24159	1.84e-22	Up	9.61e-24	GDSL esterase/lipase ESM1-like [Brassica oleracea var. oleracea]
	LOC106325105	0.06	1.31	4.44846	1.67e-05	Up	3.3e-06	epithiospecifier protein-like [Brassica napus]
	LOC106326669	0.13	2.07	3.99305	1.98e-07	Up	3.02e-08	nitrile-specifier protein 5-like [Brassica oleracea var. oleracea]
	LOC106320670	8.89	123.63	3.7977	0	Up	0	cytochrome P450 81F1-like [Brassica oleracea var. oleracea]
	LOC106296341	1.73	19.41	3.48796	4.04e-65	Up	7.31e-67	ifier protein-like [Brassica napus]
	LOC106337668	1.4	13.57	3.27692	1.05e-65	Up	1.86e-67	tryptophan N-monooxygenase 2 [Brassica oleracea var. oleracea]
	LOC106336851	0.94	7.1	2.91709	1.6e-20	Up	9.19e-22	nitrile-specifier protein 2-like [Brassica oleracea var. oleracea]
	LOC106339606	0.39	2.55	2.70895	2e-09	Up	2.45e-10	cytochrome P450 83A1-like [Brassica oleracea var. oleracea]
	LOC106335543	0.37	1.86	2.32971	2.58e-05	Up	5.25e-06	probable sodium/metabolite cotransporter BASS5, chloroplastic [Brassica oleracea var. oleracea]
	LOC106324637	1	4.99	2.31904	1.27e-14	Up	1.03e-15	methylthioalkylmalate synthase 1, chloroplastic-like [Brassica rapa]
	LOC106304207	2.76	13.09	2.24573	1.16e-12	Up	1.08e-13	S-alkyl-thiohydroximate lyase SUR1-like [Brassica napus]
	LOC106306884	17.98	79.07	2.13674	3.9e-152	Up	2.8e-154	epithiospecifier protein-like [Brassica oleracea var. oleracea]
	LOC106332457	0.95	4.02	2.0812	1.72e-07	Up	2.6e-08	adenylyl-sulfate kinase 2, chloroplastic [Brassica oleracea var. oleracea]
	LOC106331508	1.45	5.78	1.99502	5.65e-11	Up	6.03e-12	biotin synthase-like [Brassica oleracea var. oleracea]
	LOC106316016	1.46	5.32	1.86546	5.61e-13	Up	5.1e-14	phenylalanine N-monooxygenase [Brassica oleracea var. oleracea]
	LOC106301712	7.82	27.61	1.81995	1.09e-39	Up	3.34e-41	cytidine deaminase 1-like [Brassica oleracea var. oleracea]
	LOC106302172	30.82	106.87	1.79392	7.3e-165	Up	4.7e-167	adenylyl-sulfate kinase 2, chloroplastic-like [Brassica oleracea var. oleracea]
	LOC106309559	2.93	10.06	1.77966	3.27e-18	Up	2.14e-19	diphosphomevalonate decarboxylase-like [Brassica oleracea var. oleracea]
	LOC106301248	10.68	35.84	1.74666	5.52e-56	Up	1.18e-57	nitrile-specifier protein 5 [Brassica oleracea var. oleracea]
	LOC106304280	57.75	185.19	1.68111	6.19e-90	Up	7.83e-92	hypothetical protein (mitochondrion) [Vicia faba]
	LOC106306810	83.32	254.05	1.60838	0	Up	0	epithiospecifier protein-like [Brassica oleracea var. oleracea]
	LOC106343078	4.79	14.58	1.60589	7.37e-18	Up	4.9e-19	GDSL esterase/lipase At3g14220 [Brassica oleracea var. oleracea]
	LOC106325229	27.38	82.35	1.58865	1.3e-107	Up	1.4e-109	transcription factor MYB34-like [Brassica oleracea var. oleracea]
	LOC106328802	0.72	2.09	1.53743	2.77e-05	Up	5.67e-06	1-deoxy-D-xylulose-5-phosphate synthase, chloroplastic-like [Brassica oleracea var. oleracea]
	LOC106302805	18.55	52.84	1.51021	2.3e-60	Up	4.46e-62	adenylyl-sulfate kinase 2, chloroplastic-like [Brassica oleracea var. oleracea]
	LOC106311680	1.44	3.98	1.4667	6.07e-06	Up	1.12e-06	flavin-containing monooxygenase FMO GS-OX5 [Brassica oleracea var. oleracea]
	LOC106319296	0.63	1.73	1.45735	0.000218	Up	5.2e-05	putative pentatricopeptide repeat-containing protein At3g16890, mitochondrial [Brassica oleracea var. oleracea]
	LOC106339571	3.43	9.29	1.43747	5.66e-08	Up	8.09e-09	thiocyanate methyltransferase 1 isoform X1 [Brassica napus]
	LOC106313567	19.77	50.65	1.35725	1.36e-47	Up	3.46e-49	adenylyl-sulfate kinase 1, chloroplastic [Brassica oleracea var. oleracea]
	LOC106310441	6.37	16.28	1.35373	1.47e-21	Up	8.05e-23	5'-adenylylsulfate reductase 3, chloroplastic [Brassica oleracea var. oleracea]
	LOC106313580	17.18	42.92	1.32092	2.17e-47	Up	5.57e-49	methionine gamma-lyase-like [Brassica napus]
	LOC106301587	0.5	1.24	1.31034	3.35e-07	Up	5.25e-08	separase [Brassica oleracea var. oleracea]
	LOC106306240	0.98	2.37	1.27403	0.000183	Up	4.31e-05	gamma-glutamyltranspeptidase 3-like [Brassica oleracea var. oleracea]
	LOC106310361	4.49	10.44	1.21733	1.49e-12	Up	1.4e-13	selenium-binding protein 1-like isoform X2 [Brassica oleracea var. oleracea]
	LOC106331277	2.07	4.65	1.1676	6e-06	Up	1.11e-06	V-type proton ATPase subunit H-like isoform X1 [Brassica oleracea var. oleracea]
	LOC106296795	8.79	19.6	1.15692	7.24e-15	Up	5.77e-16	cytosolic sulfotransferase 18 [Brassica oleracea var. oleracea]
	LOC106316163	0.52	1.15	1.14505	1.31e-05	Up	2.55e-06	separase-like [Brassica oleracea var. oleracea]
	LOC106336995	5.81	12.57	1.11338	1.71e-10	Up	1.9e-11	protein DJ-1 homolog A-like [Brassica oleracea var. oleracea]
	LOC106343089	6.14	13.28	1.11295	2.09e-15	Up	1.61e-16	dihomomethionine N-hydroxylase-like [Brassica oleracea var. oleracea]
	LOC106309879	3.94	8.52	1.11266	2.1e-06	Up	3.64e-07	probable uridine nucleosidase 2 [Brassica oleracea var. oleracea]
	LOC106292635	8.08	16.93	1.06716	2.99e-12	Up	2.86e-13	BCAT4 [Brassicaoleracea var. alboglabra]
	LOC106309808	1.98	4.13	1.06064	0.000291	Up	7.1e-05	glutathione gamma-glutamylcysteinyltransferase 2 [Brassica oleracea var. oleracea]
	LOC106312180	146.94	306.25	1.05948	2.6e-279	Up	8.7e-282	cytochrome P450 83B1 [Brassica oleracea var. oleracea]
	LOC106331528	29.74	61.18	1.04066	6.27e-36	Up	2.11e-37	adenylyl-sulfate kinase 1, chloroplastic-like [Brassica oleracea var. oleracea]
	LOC106294846	35.53	72.17	1.02236	3.54e-57	Up	7.4e-59	UDP-glycosyltransferase 74B1 [Brassica oleracea var. oleracea]
	LOC106332388	39.95	80.2	1.00541	1.16e-20	Up	6.6e-22	uncharacterized protein LOC103858927 [Brassica rapa]
	LOC106312812	115.24	0.07	-10.685	0	Down	0	peptidyl-prolyl cis-trans isomerase CYP20-3, chloroplastic [Brassica oleracea var. oleracea]
	LOC106294141	4.65	0.01	-8.86109	1.96e-11	Down	2.01e-12	aspartate-semialdehyde dehydrogenase-like [Brassica napus]
	LOC106315065	35.62	0.18	-7.62855	5.99e-54	Down	1.34e-55	peptidyl-prolyl cis-trans isomerase CYP20-3, chloroplastic-like [Brassica oleracea var. oleracea]
	LOC106317906	9.89	0.45	-4.45797	9.9e-33	Down	3.62e-34	bifunctional L-3-cyanoalanine synthase/cysteine synthase D2-like [Brassica oleracea var. oleracea]
	LOC106336556	24.36	4.43	-2.45914	4.58e-66	Down	8.05e-68	cytosolic sulfotransferase 18-like isoform X1 [Brassica oleracea var. oleracea]
	LOC106321630	17.19	3.91	-2.13633	2.38e-59	Down	4.75e-61	methylenetetrahydrofolate reductase 1-like [Brassica oleracea var. oleracea]
	LOC106342984	7.25	1.86	-1.96268	8.95e-20	Down	5.34e-21	beta-glucosidase 26, peroxisomal [Brassica rapa]
	LOC106316636	4.57	1.22	-1.90531	6.67e-09	Down	8.6e-10	cytosolic sulfotransferase 18-like [Brassica oleracea var. oleracea]
	LOC106327302	5.49	1.58	-1.79688	4.57e-12	Down	4.44e-13	glutathione gamma-glutamylcysteinyltransferase 1-like isoform X1 [Brassica oleracea var. oleracea]
	LOC106329400	50.71	16.78	-1.59553	3.65e-74	Down	5.65e-76	protein DJ-1 homolog A-like [Brassica oleracea var. oleracea]
	LOC106298502	7.32	2.55	-1.52135	4.29e-07	Down	6.8e-08	glutathione S-transferase U12 [Brassica oleracea var. oleracea]
	LOC106342808	58.13	22.65	-1.35977	6.06e-68	Down	1.03e-69	LOW QUALITY PROTEIN: cysteine synthase, chloroplastic/chromoplastic [Brassica oleracea var. oleracea]
	LOC106307277	11.92	5.33	-1.16118	2.86e-10	Down	3.23e-11	homocysteine S-methyltransferase 2 isoform X2 [Brassica oleracea var. oleracea]
	LOC106307736	42.11	19.21	-1.13231	3.76e-45	Down	1.01e-46	casein kinase I isoform X2 [Brassica oleracea var. oleracea]
	LOC106315891	14.61	6.94	-1.07395	1.74e-07	Down	2.63e-08	3-isopropylmalate dehydratase large subunit-like [Brassica oleracea var. oleracea]
DEGs involved in proteolysis, peptidase and hydrolase activity	LOC106319973	83.43	1105.76	3.72833	0	Up	0	kunitz-type serine protease inhibitor DrTI-like [Brassica oleracea var. oleracea]
	LOC106327479	18.33	175.89	3.2624	0	Up	0	trypsin inhibitor B-like [Brassica oleracea var. oleracea]
	LOC106319964	206.81	1118.43	2.4351	0	Up	0	kunitz-type serine protease inhibitor DrTI-like [Brassica oleracea var. oleracea]
	LOC106342399	14.44	63.93	2.14642	2.25e-57	Up	4.66e-59	cysteine proteinase inhibitor 3-like [Brassica oleracea var. oleracea]
	LOC106319971	873.9	3236.98	1.88911	0	Up	0	kunitz-type trypsin inhibitor-like 1 protein [Brassica oleracea var. oleracea]
	LOC106300100	125.86	412.25	1.7117	0	Up	0	kunitz-type serine protease inhibitor DrTI-like [Brassica oleracea var. oleracea]
	LOC106319958	79.64	242.91	1.60886	1e-140	Up	8e-143	kunitz-type serine protease inhibitor DrTI-like [Brassica oleracea var. oleracea]
	LOC106298131	47.27	130.29	1.46273	8.25e-58	Up	1.7e-59	21 kDa seed protein-like [Brassica oleracea var. oleracea]
	LOC106335385	9.06	22.59	1.3181	1.08e-14	Up	8.71e-16	putative 4-hydroxy-4-methyl-2-oxoglutarate aldolase 2 [Brassica oleracea var. oleracea]
	LOC106318153	4.04	9.58	1.24567	2.44e-06	Up	4.25e-07	cysteine proteinase inhibitor 6-like [Brassica oleracea var. oleracea]
	LOC106296630	103.2	233.7	1.17921	3.1e-144	Up	2.3e-146	bark lectin isoform 2-like [Brassica oleracea var. oleracea]
	LOC106296618	75.26	167.72	1.1561	1.12e-90	Up	1.41e-92	kunitz-type serine protease inhibitor DrTI-like [Brassica oleracea var. oleracea]
DEGs involved in chromatin organization	LOC106310077	4.39	13.73	1.64504	2.18e-13	Up	1.92e-14	histone H3-like centromeric protein HTR12 isoform X1 [Brassica oleracea var. oleracea]
	LOC106336341	5.88	16.77	1.51199	7.87e-11	Up	8.51e-12	probable histone H2A variant 2 [Brassica oleracea var. oleracea]
	LOC106331813	21.83	61.68	1.49849	1.27e-31	Up	4.81e-33	histone H2B.3-like [Brassica napus]
	LOC106292483	49.15	132.74	1.43334	4e-112	Up	4e-114	histone H1.1-like [Brassica napus]
	LOC106331614	56.02	147.16	1.39337	7.89e-59	Up	1.59e-60	histone H2B.3-like [Brassica napus]
	LOC106324812	50.36	128.98	1.3568	5.26e-66	Up	9.27e-68	probable histone H2A.7 [Brassica oleracea var. oleracea]
	LOC106318337	3.6	8.99	1.32032	3.45e-18	Up	2.25e-19	ATP-dependent DNA helicase DDM1 [Brassica oleracea var. oleracea]
	LOC106313350	54.13	133.59	1.30331	1.1e-58	Up	2.23e-60	histone H2B.10-like [Brassica napus]
	LOC106312186	24.56	55.43	1.17436	3.41e-22	Up	1.81e-23	histone H2B.8-like [Brassica napus]
	LOC106296339	3.85	8.56	1.15275	0.000114	Up	2.59e-05	histone H2A variant 1 [Brassica oleracea var. oleracea]
	LOC106318253	16.69	35	1.06837	2.99e-12	Up	2.86e-13	probable histone H2A.2 [Brassica oleracea var. oleracea]
	LOC106295459	29.46	61.54	1.06277	4.9e-21	Up	2.75e-22	probable histone H2AXa [Brassica napus]
	LOC106300483	36.87	76.28	1.04886	6.87e-29	Up	2.8e-30	hypothetical protein CARUB_v10010503mg, partial [Capsella rubella]
	LOC106301713	6.33	12.99	1.03712	6.27e-18	Up	4.16e-19	ATP-dependent DNA helicase DDM1 [Brassica oleracea var. oleracea]
	LOC106301786	51.16	103.2	1.01235	5.29e-38	Up	1.69e-39	probable histone H2A.5 [Brassica rapa]
DEGs involved in oxidoreductase activity	LOC106331605	0.01	4.93	8.94544	5.37e-30	Up	2.12e-31	cytochrome P450 82G1 [Brassica oleracea var. oleracea]
	LOC106295280	0.01	2.19	7.77479	5.38e-09	Up	6.86e-10	delta-9 desaturase-like 5 protein [Brassica oleracea var. oleracea]
	LOC106297345	0.01	2.07	7.69349	0.000733	Up	0.000193	phosphoenolpyruvate carboxylase 1-like [Brassica oleracea var. oleracea]
	LOC106313295	0.01	1.62	7.33985	1.26e-07	Up	1.86e-08	respiratory burst oxidase homolog protein C-like [Brassica oleracea var. oleracea]
	LOC106320988	0.18	27.99	7.28077	1.9e-300	Up	5.6e-303	lipoxygenase 2, chloroplastic-like [Brassica oleracea var. oleracea]
	LOC106300607	0.98	144.41	7.20317	0	Up	0	lipoxygenase 2, chloroplastic-like [Brassica oleracea var. oleracea]
	LOC106293410	0.01	1.33	7.05528	3.42e-05	Up	7.11e-06	prolyl 4-hydroxylase 5-like isoform X1 [Brassica oleracea var. oleracea]
	LOC106326442	0.01	1.07	6.74147	1.84e-05	Up	3.67e-06	cytochrome P450 71B2-like isoform X1 [Brassica oleracea var. oleracea]
	LOC106298401	0.08	7.85	6.61655	1.57e-46	Up	4.08e-48	cytochrome P450 81F1-like [Brassica oleracea var. oleracea]
	LOC106298705	0.01	0.98	6.61471	3.42e-05	Up	7.11e-06	gibberellin 20 oxidase 4 [Brassica oleracea var. oleracea]
	LOC106321232	0.16	15.56	6.60363	6.5e-59	Up	1.31e-60	lipoxygenase 2, chloroplastic-like [Brassica napus]
	LOC106321402	0.54	46.64	6.43246	5.7e-150	Up	4.2e-152	lipoxygenase 2, chloroplastic-like [Brassica napus]
	LOC106310026	0.01	0.58	5.85798	0.000398	Up	9.98e-05	cytochrome P450 78A5-like [Brassica oleracea var. oleracea]
	LOC106321533	0.28	13.53	5.59459	1.01e-76	Up	1.5e-78	CDY04196.1|//BnaC06g26190D [Brassica napus]
	LOC106344183	0.09	4.17	5.53398	1.08e-24	Up	5.13e-26	cytochrome P450 78A5 [Brassica oleracea var. oleracea]
	LOC106298490	0.08	3.64	5.50779	5.78e-14	Up	4.88e-15	putative peroxisomal acyl-coenzyme A oxidase 1.2 [Brassica oleracea var. oleracea]
	LOC106309886	0.06	1.81	4.91488	2.66e-07	Up	4.11e-08	KDEL-tailed cysteine endopeptidase CEP2 [Brassica oleracea var. oleracea]
	LOC106337156	0.04	0.95	4.56986	2.99e-05	Up	6.14e-06	trans-cinnamate 4-monooxygenase-like [Brassica oleracea var. oleracea]
	LOC106299601	0.13	3	4.52838	5.19e-06	Up	9.47e-07	thioredoxin H8-like [Brassica oleracea var. oleracea]
	LOC106340199	0.25	5.63	4.49313	5.16e-11	Up	5.5e-12	glutaredoxin-C13 [Brassica oleracea var. oleracea]
	LOC106293581	0.03	0.64	4.41504	0.000216	Up	5.15e-05	protein disulfide isomerase-like 1-1 [Brassica oleracea var. oleracea]
	LOC106292506	0.05	1.01	4.33628	0.000117	Up	2.66e-05	cinnamyl alcohol dehydrogenase 5 isoform X1 [Brassica oleracea var. oleracea]
	LOC106329435	0.05	0.93	4.21723	9.45e-05	Up	2.12e-05	bifunctional dihydrofolate reductase-thymidylate synthase 1 isoform X3 [Brassica oleracea var. oleracea]
	LOC106316934	0.05	0.87	4.12101	0.00052	Up	0.000133	probable indole-3-pyruvate monooxygenase YUCCA4 [Brassica oleracea var. oleracea]
	LOC106302238	0.34	5.45	4.00265	5.21e-25	Up	2.45e-26	cytochrome P450 76C4-like [Brassica oleracea var. oleracea]
	LOC106325604	0.2	2.83	3.82273	1.3e-09	Up	1.57e-10	feruloyl CoA ortho-hydroxylase 1 [Brassica oleracea var. oleracea]
	LOC106320670	8.89	123.63	3.7977	0	Up	0	cytochrome P450 81F1-like [Brassica oleracea var. oleracea]
	LOC106295279	0.31	3.19	3.36322	6.72e-16	Up	5.03e-17	putative acyl-coenzyme A oxidase 3.2, peroxisomal [Brassica oleracea var. oleracea]
	LOC106308073	3.98	40.77	3.35667	6.47e-55	Up	1.43e-56	thioredoxin H-type [Brassica oleracea var. oleracea]
	LOC106337668	1.4	13.57	3.27692	1.05e-65	Up	1.86e-67	tryptophan N-monooxygenase 2 [Brassica oleracea var. oleracea]
	LOC106329578	0.13	1.16	3.15754	1.72e-05	Up	3.4e-06	cytochrome P450 705A5-like [Brassica oleracea var. oleracea]
	LOC106339986	0.32	2.72	3.08746	4.21e-09	Up	5.29e-10	leucoanthocyanidin dioxygenase [Brassica oleracea var. oleracea]
	LOC106334503	0.63	4.69	2.89616	0.000236	Up	5.67e-05	UPF0676 protein C1494.01-like [Brassica oleracea var. oleracea]
	LOC106343115	0.12	0.87	2.85798	0.000394	Up	9.84e-05	aldehyde dehydrogenase family 2 member B7, mitochondrial [Brassica oleracea var. oleracea]
	LOC106331938	0.89	6.36	2.83715	1.89e-15	Up	1.46e-16	plant cysteine oxidase 1 [Brassica oleracea var. oleracea]
	LOC106293773	0.42	2.99	2.83168	3.11e-08	Up	4.31e-09	gibberellin 2-beta-dioxygenase 2-like [Brassica oleracea var. oleracea]
	LOC106298807	0.65	4.47	2.78176	2.46e-06	Up	4.29e-07	thioredoxin-like protein CITRX, chloroplastic [Brassica oleracea var. oleracea]
	LOC106293096	0.5	3.35	2.74416	4.3e-09	Up	5.41e-10	inositol oxygenase 1 isoform X1 [Brassica oleracea var. oleracea]
	LOC106339606	0.39	2.55	2.70895	2e-09	Up	2.45e-10	cytochrome P450 83A1-like [Brassica oleracea var. oleracea]
	LOC106313856	23.17	144.12	2.63694	0	Up	0	inositol oxygenase 2-like [Brassica oleracea var. oleracea]
	LOC106337409	0.6	3.6	2.58496	9.43e-18	Up	6.31e-19	delta-1-pyrroline-5-carboxylate synthase A isoform X1 [Brassica oleracea var. oleracea]
	LOC106309653	0.32	1.86	2.53916	8.18e-05	Up	1.81e-05	1-aminocyclopropane-1-carboxylate oxidase 3-like [Brassica oleracea var. oleracea]
	LOC106308314	0.2	1.16	2.53605	8.18e-05	Up	1.81e-05	protein HOTHEAD [Brassica oleracea var. oleracea]
	LOC106308893	0.92	4.9	2.41308	5.77e-14	Up	4.86e-15	sterol 14-demethylase-like [Brassica oleracea var. oleracea]
	LOC106326162	0.95	5.03	2.40456	3.02e-15	Up	2.35e-16	cytokinin hydroxylase-like [Brassica oleracea var. oleracea]
	LOC106306435	29.93	150.34	2.32857	0	Up	0	allene oxide synthase 2 [Brassica rapa]
	LOC106339412	1.38	6.85	2.31144	3.44e-15	Up	2.69e-16	plant cysteine oxidase 2 [Brassica oleracea var. oleracea]
	LOC106331344	1.9	8.83	2.21641	5.86e-17	Up	4.13e-18	delta-9 acyl-lipid desaturase 2-like [Brassica oleracea var. oleracea]
	LOC106308135	2.2	10.11	2.20021	1.35e-16	Up	9.77e-18	tetraketide alpha-pyrone reductase 1-like [Brassica oleracea var. oleracea]
	LOC106316184	5.23	23.88	2.19092	7.48e-33	Up	2.73e-34	peptide methionine sulfoxide reductase A2 [Brassica oleracea var. oleracea]
	LOC106342019	1.93	8.44	2.12864	8.86e-15	Up	7.11e-16	cinnamoyl-CoA reductase 2-like [Brassica napus]
	LOC106328714	0.83	3.6	2.11681	5.12e-11	Up	5.45e-12	internal alternative NAD(P)H-ubiquinone oxidoreductase A2, mitochondrial [Brassica oleracea var. oleracea]
	LOC106336937	1	4.33	2.11437	1.31e-05	Up	2.54e-06	glycine-rich RNA-binding protein GRP2A [Brassica oleracea var. oleracea]
	LOC106308009	0.37	1.46	1.98037	0.000408	Up	0.000102	cytochrome P450 71B28-like [Brassica oleracea var. oleracea]
	LOC106304140	0.72	2.72	1.91754	2.39e-08	Up	3.27e-09	cytochrome P450 86B1 [Brassica oleracea var. oleracea]
	LOC106298272	2.33	8.64	1.8907	1.2e-14	Up	9.74e-16	isoflavone reductase homolog P3 [Brassica oleracea var. oleracea]
	LOC106344079	2.04	7.56	1.88982	2.39e-08	Up	3.27e-09	monothiol glutaredoxin-S15, mitochondrial [Brassica oleracea var. oleracea]
	LOC106328819	28.86	105.78	1.87392	1.4e-164	Up	8.9e-167	hyoscyamine 6-dioxygenase-like [Brassica oleracea var. oleracea]
	LOC106316016	1.46	5.32	1.86546	5.61e-13	Up	5.1e-14	phenylalanine N-monooxygenase [Brassica oleracea var. oleracea]
	LOC106301935	1.04	3.77	1.85798	7.02e-07	Up	1.14e-07	peroxisomal (S)-2-hydroxy-acid oxidase GLO5 [Brassica oleracea var. oleracea]
	LOC106301717	77.86	276.55	1.82859	0	Up	0	cytochrome P450 79B1 [Brassica oleracea var. oleracea]
	LOC106331276	15.86	55.94	1.81849	2.3e-142	Up	1.8e-144	D-3-phosphoglycerate dehydrogenase 1, chloroplastic-like [Brassica napus]
	LOC106305680	8.74	29.94	1.77637	1.84e-65	Up	3.27e-67	catalase-1 [Brassica oleracea var. oleracea]
	LOC106295138	6.77	22.94	1.76064	3.61e-37	Up	1.18e-38	1-aminocyclopropane-1-carboxylate oxidase homolog 1 [Brassica oleracea var. oleracea]
	LOC106314606	10.49	35.27	1.74943	2.32e-88	Up	2.99e-90	D-3-phosphoglycerate dehydrogenase 1, chloroplastic [Brassica oleracea var. oleracea]
	LOC106327666	32.4	107.42	1.7292	5.1e-233	Up	2.3e-235	L-ascorbate oxidase-like [Brassica oleracea var. oleracea]
	LOC106299768	23.67	78.18	1.72374	2.7e-182	Up	1.6e-184	9-cis-epoxycarotenoid dioxygenase NCED9, chloroplastic [Brassica oleracea var. oleracea]
	LOC106328829	10.56	34.64	1.71383	2.75e-54	Up	6.16e-56	omega-3 fatty acid desaturase, endoplasmic reticulum-like [Brassica oleracea var. oleracea]
	LOC106310015	1.18	3.81	1.691	3.18e-08	Up	4.41e-09	cytochrome P450 77A3-like [Brassica oleracea var. oleracea]
	LOC106294962	2.07	6.68	1.69022	3.65e-09	Up	4.56e-10	chaperone protein dnaJ 6 [Brassica oleracea var. oleracea]
	LOC106322794	1.09	3.48	1.67476	9.58e-10	Up	1.14e-10	trifunctional UDP-glucose 4,6-dehydratase/UDP-4-keto-6-deoxy-D-glucose 3,5-epimerase/UDP-4-keto-L-rhamnose-reductase RHM3-like [Brassica oleracea var. oleracea]
	LOC106326885	0.7	2.18	1.6389	4.67e-11	Up	4.94e-12	indole-3-acetaldehyde oxidase-like isoform X1 [Brassica oleracea var. oleracea]
	LOC106295186	1.77	5.43	1.6172	8.13e-10	Up	9.61e-11	probable prolyl 4-hydroxylase 3 [Brassica oleracea var. oleracea]
	LOC106311898	13.63	41.49	1.60598	2.87e-91	Up	3.6e-93	D-3-phosphoglycerate dehydrogenase 2, chloroplastic [Brassica oleracea var. oleracea]
	LOC106306623	6.42	19.25	1.58421	2.33e-26	Up	1.04e-27	cinnamyl alcohol dehydrogenase 5 [Brassica rapa]
	LOC106329010	1.11	3.32	1.58062	8.11e-09	Up	1.05e-09	9-cis-epoxycarotenoid dioxygenase NCED3, chloroplastic-like [Brassica oleracea var. oleracea]
	LOC106324893	1.44	4.28	1.57154	7.97e-05	Up	1.76e-05	L-ascorbate peroxidase 5, peroxisomal [Brassica oleracea var. oleracea]
	LOC106332790	5.05	14.83	1.55416	3.57e-16	Up	2.64e-17	NADH--cytochrome b5 reductase 1-like [Brassica oleracea var. oleracea]
	LOC106294068	1.35	3.95	1.54889	6.7e-07	Up	1.09e-07	acyl-[acyl-carrier-protein] desaturase 5, chloroplastic [Brassica oleracea var. oleracea]
	LOC106293811	0.86	2.5	1.53952	0.000115	Up	2.62e-05	cytochrome P450 87A3-like isoform X1 [Brassica oleracea var. oleracea]
	LOC106328802	0.72	2.09	1.53743	2.77e-05	Up	5.67e-06	1-deoxy-D-xylulose-5-phosphate synthase, chloroplastic-like [Brassica oleracea var. oleracea]
	LOC106293533	3.99	11.46	1.52215	4.86e-11	Up	5.16e-12	chaperone protein dnaJ 6-like isoform X1 [Brassica oleracea var. oleracea]
	LOC106341727	1314.49	3758.15	1.51552	0	Up	0	ribulose bisphosphate carboxylase small chain F1, chloroplastic-like [Brassica oleracea var. oleracea]
	LOC106331792	1.78	5.07	1.51011	7.23e-06	Up	1.35e-06	prolyl 4-hydroxylase 2 [Brassica oleracea var. oleracea]
	LOC106328324	21.84	62.11	1.50785	4.36e-70	Up	7.13e-72	putative inactive flavonol synthase 2 [Brassica oleracea var. oleracea]
	LOC106311680	1.44	3.98	1.4667	6.07e-06	Up	1.12e-06	flavin-containing monooxygenase FMO GS-OX5 [Brassica oleracea var. oleracea]
	LOC106301142	6.01	16.57	1.46314	3.19e-26	Up	1.43e-27	alkane hydroxylase MAH1-like [Brassica oleracea var. oleracea]
	LOC106319166	35.46	95.97	1.43639	5.1e-122	Up	4.7e-124	formate dehydrogenase, mitochondrial [Brassica oleracea var. oleracea]
	LOC106301448	27.53	72.91	1.40511	1.3e-31	Up	4.92e-33	CDX92861.1|//BnaC07g41190D [Brassica napus]
	LOC106322944	4.27	11.2	1.39119	2.02e-08	Up	2.74e-09	uncharacterized protein LOC106322944 [Brassica oleracea var. oleracea]
	LOC106328226	168.77	439.3	1.38015	0	Up	0	glutathione S-transferase F9 [Brassica rapa]
	LOC106327567	14.28	36.84	1.36728	5.57e-60	Up	1.09e-61	3-hydroxy-3-methylglutaryl-coenzyme A reductase 1 isoform X2 [Brassica oleracea var. oleracea]
	LOC106337504	0.95	2.44	1.36088	7.61e-05	Up	1.68e-05	CDX95315.1|//BnaC04g28430D [Brassica napus]
	LOC106318641	14.73	37.68	1.35504	4.22e-68	Up	7.15e-70	squalene monooxygenase 1,1 [Brassica oleracea var. oleracea]
	LOC106310441	6.37	16.28	1.35373	1.47e-21	Up	8.05e-23	5'-adenylylsulfate reductase 3, chloroplastic [Brassica oleracea var. oleracea]
	LOC106343875	18.67	46.69	1.32239	1.6e-134	Up	1.3e-136	cytochrome P450 705A5-like [Brassica oleracea var. oleracea]
	LOC106319662	1.36	3.38	1.31342	7.28e-07	Up	1.19e-07	trifunctional UDP-glucose 4,6-dehydratase/UDP-4-keto-6-deoxy-D-glucose 3,5-epimerase/UDP-4-keto-L-rhamnose-reductase RHM2-like [Brassica oleracea var. oleracea]
	LOC106319864	10.51	26.11	1.31284	1.41e-18	Up	9.04e-20	uncharacterized protein YwbO [Brassica oleracea var. oleracea]
	LOC106306241	106.25	263.93	1.31269	0	Up	0	cytochrome P450 81D11 [Brassica oleracea var. oleracea]
	LOC106302779	124.97	310.25	1.31185	0	Up	0	cytochrome P450 79B1 [Brassica oleracea var. oleracea]
	LOC106313607	2.33	5.78	1.31074	1.39e-07	Up	2.07e-08	glutamate dehydrogenase 2 [Brassica oleracea var. oleracea]
	LOC106342187	189.61	468.7	1.30563	0	Up	0	glutathione S-transferase F9 [Brassica oleracea var. oleracea]
	LOC106327616	1.5	3.7	1.30256	5.99e-06	Up	1.11e-06	protein disulfide isomerase-like 1-4 [Brassica oleracea var. oleracea]
	LOC106328086	2.32	5.72	1.30189	0.000698	Up	0.000183	hypothetical protein EUTSA_v10004952mg [Eutrema salsugineum]
	LOC106303690	5.78	14.21	1.29777	8.99e-14	Up	7.7e-15	L-lactate dehydrogenase B-like [Brassica oleracea var. oleracea]
	LOC106307684	7.69	18.89	1.29657	1.26e-10	Up	1.38e-11	glycine-rich RNA-binding protein GRP1A isoform X1 [Brassica oleracea var. oleracea]
	LOC106341839	1.98	4.86	1.29546	9.93e-08	Up	1.46e-08	3beta-hydroxysteroid-dehydrogenase/decarboxylase isoform 3 [Brassica oleracea var. oleracea]
	LOC106307758	5.31	12.86	1.27611	8.26e-13	Up	7.61e-14	aldo-keto reductase family 4 member C11 [Brassica oleracea var. oleracea]
	LOC106309564	28.76	69.45	1.27191	1.34e-43	Up	3.71e-45	glutathione S-transferase DHAR1, mitochondrial-like [Brassica oleracea var. oleracea]
	LOC106292668	21.25	50.88	1.25964	2.35e-42	Up	6.75e-44	bifunctional dTDP-4-dehydrorhamnose 3,5-epimerase/dTDP-4-dehydrorhamnose reductase-like [Brassica oleracea var. oleracea]
	LOC106319126	3.52	8.42	1.25825	1.32e-11	Up	1.34e-12	UDP-glucose 6-dehydrogenase 3-like [Brassica oleracea var. oleracea]
	LOC106342859	1.08	2.56	1.24511	3.89e-09	Up	4.87e-10	DNA-directed RNA polymerase IV subunit 1-like [Brassica oleracea var. oleracea]
	LOC106301288	20.5	48.59	1.24504	7.25e-44	Up	2.01e-45	ribonucleoside-diphosphate reductase small chain C-like [Brassica rapa]
	LOC106339520	2.96	7	1.24176	4.98e-07	Up	7.97e-08	4-hydroxy-tetrahydrodipicolinate reductase 1, chloroplastic [Brassica oleracea var. oleracea]
	LOC106307120	24.1	56.94	1.24041	5.76e-82	Up	8.05e-84	D-3-phosphoglycerate dehydrogenase 1, chloroplastic-like [Brassica oleracea var. oleracea]
	LOC106332335	2.76	6.52	1.2402	7.71e-07	Up	1.26e-07	1-aminocyclopropane-1-carboxylate oxidase homolog 1-like [Brassica oleracea var. oleracea]
	LOC106343330	7.31	17.23	1.23698	7.58e-22	Up	4.09e-23	cytochrome P450 72A15 isoform X1 [Brassica oleracea var. oleracea]
	LOC106329505	25.17	59.32	1.23681	8.76e-71	Up	1.41e-72	CDX84830.1|//BnaA03g14000D [Brassica napus]
	LOC106322519	10.07	22.99	1.19094	1.86e-19	Up	1.13e-20	ribonucleoside-diphosphate reductase small chain C-like [Brassica rapa]
	LOC106294051	19.01	43.06	1.17959	2.44e-35	Up	8.37e-37	peroxisomal (S)-2-hydroxy-acid oxidase GLO3-like [Brassica oleracea var. oleracea]
	LOC106342398	22.34	49.19	1.13874	1.17e-53	Up	2.64e-55	cytochrome P450 98A3-like [Brassica oleracea var. oleracea]
	LOC106306097	2.62	5.75	1.134	4.49e-13	Up	4.05e-14	probable LRR receptor-like serine/threonine-protein kinase At4g36180 [Brassica oleracea var. oleracea]
	LOC106331861	2.95	6.47	1.13305	0.000151	Up	3.51e-05	phytochromobilin:ferredoxin oxidoreductase, chloroplastic-like isoform X2 [Brassica oleracea var. oleracea]
	LOC106337590	28.82	62.76	1.12278	8.5e-24	Up	4.21e-25	glutaredoxin-C2 [Brassica oleracea var. oleracea]
	LOC106343089	6.14	13.28	1.11295	2.09e-15	Up	1.61e-16	dihomomethionine N-hydroxylase-like [Brassica oleracea var. oleracea]
	LOC106335131	13.91	30.05	1.11124	3.35e-18	Up	2.19e-19	glycine-rich RNA-binding protein 10-like [Brassica napus]
	LOC106321648	7.67	16.53	1.10779	1.41e-15	Up	1.08e-16	glutamate dehydrogenase 2-like [Brassica oleracea var. oleracea]
	LOC106292229	7.11	15.29	1.10467	3.66e-07	Up	5.75e-08	germin-like protein subfamily 3 member 2 [Brassica oleracea var. oleracea]
	LOC106335868	13.14	28.08	1.09558	1.26e-43	Up	3.51e-45	ribonucleoside-diphosphate reductase large subunit-like [Brassica oleracea var. oleracea]
	LOC106308071	50.84	108.28	1.09073	3.83e-60	Up	7.48e-62	2-oxoglutarate-dependent dioxygenase DAO-like [Brassica oleracea var. oleracea]
	LOC106321319	1.83	3.84	1.06926	3.82e-05	Up	7.99e-06	multicopper oxidase LPR1 [Brassica oleracea var. oleracea]
	LOC106343828	17.89	37.53	1.06889	2.25e-24	Up	1.09e-25	2-oxoglutarate-dependent dioxygenase DAO-like [Brassica oleracea var. oleracea]
	LOC106309808	1.98	4.13	1.06064	0.000291	Up	7.1e-05	glutathione gamma-glutamylcysteinyltransferase 2 [Brassica oleracea var. oleracea]
	LOC106312180	146.94	306.25	1.05948	2.6e-279	Up	8.7e-282	cytochrome P450 83B1 [Brassica oleracea var. oleracea]
	LOC106332205	28.83	60.06	1.05883	2.88e-21	Up	1.59e-22	peptide methionine sulfoxide reductase B5-like [Brassica oleracea var. oleracea]
	LOC106294706	22.79	47.46	1.05831	4.33e-39	Up	1.35e-40	4-hydroxyphenylpyruvate dioxygenase [Brassica oleracea var. oleracea]
	LOC106313738	9.09	18.67	1.03837	2.13e-13	Up	1.88e-14	chorismate mutase 1, chloroplastic-like [Brassica oleracea var. oleracea]
	LOC106301303	26.23	53.52	1.02886	2.73e-47	Up	7.01e-49	aldehyde dehydrogenase family 3 member F1-like [Brassica oleracea var. oleracea]
	LOC106342621	39.85	81.26	1.02797	2.08e-40	Up	6.24e-42	probable peroxygenase 3 [Brassica oleracea var. oleracea]
	LOC106320147	9.53	19.42	1.027	4.32e-13	Up	3.89e-14	putative GDP-L-fucose synthase 2 [Brassica oleracea var. oleracea]
	LOC106308167	3.37	6.83	1.01914	5.32e-06	Up	9.74e-07	uncharacterized PKHD-type hydroxylase At1g22950-like [Brassica oleracea var. oleracea]
	LOC106321172	20.17	40.7	1.01282	1.7e-32	Up	6.28e-34	cytosolic isocitrate dehydrogenase [NADP] [Brassica oleracea var. oleracea]
	LOC106307075	4.57	9.21	1.01101	8.73e-14	Up	7.47e-15	ribonucleoside-diphosphate reductase large subunit [Brassica oleracea var. oleracea]
	LOC106307006	21.58	43.27	1.00367	1.38e-38	Up	4.35e-40	cytochrome P450 84A1 [Brassica oleracea var. oleracea]
	LOC106341756	6.3	12.62	1.00229	1.63e-07	Up	2.45e-08	aldo-keto reductase family 4 member C9 [Brassica oleracea var. oleracea]
	LOC106292763	12.12	24.26	1.00119	1.16e-13	Up	1e-14	2-oxoglutarate-dependent dioxygenase DAO-like [Brassica oleracea var. oleracea]
	LOC106321976	8.3	0.01	-9.69697	1.2e-16	Down	8.62e-18	uncharacterized protein LOC106321976 isoform X1 [Brassica oleracea var. oleracea]
	LOC106294141	4.65	0.01	-8.86109	1.96e-11	Down	2.01e-12	aspartate-semialdehyde dehydrogenase-like [Brassica napus]
	LOC106341934	3.65	0.01	-8.51175	1.71e-14	Down	1.4e-15	delta(8)-fatty-acid desaturase 2-like [Brassica oleracea var. oleracea]
	LOC106320075	20.03	0.09	-7.79802	3.84e-65	Down	6.92e-67	thioredoxin Y2, chloroplastic [Brassica oleracea var. oleracea]
	LOC106308892	2.05	0.01	-7.67948	1.05e-05	Down	2e-06	cytochrome P450 77A3-like [Brassica oleracea var. oleracea]
	LOC106318433	0.77	0.01	-6.26679	1.18e-12	Down	1.1e-13	xanthine dehydrogenase 1-like [Brassica oleracea var. oleracea]
	LOC106337487	6.45	0.09	-6.16323	3.16e-57	Down	6.59e-59	flavonol synthase/flavanone 3-hydroxylase [Brassica oleracea var. oleracea]
	LOC106329628	1.07	0.05	-4.41954	6.7e-09	Down	8.64e-10	respiratory burst oxidase homolog protein A-like [Brassica oleracea var. oleracea]
	LOC106320935	1.5	0.08	-4.22882	4.62e-08	Down	6.53e-09	delta(8)-fatty-acid desaturase 2-like [Brassica oleracea var. oleracea]
	LOC106343336	27.24	1.49	-4.19234	9.9e-149	Down	7.4e-151	glycerol-3-phosphate acyltransferase, chloroplastic isoform X2 [Brassica oleracea var. oleracea]
	LOC106340775	7.12	0.39	-4.19033	1.68e-32	Down	6.2e-34	cytochrome P450 76C3-like [Brassica oleracea var. oleracea]
	LOC106337378	5.95	0.62	-3.26255	1.18e-20	Down	6.76e-22	probable sarcosine oxidase [Brassica oleracea var. oleracea]
	LOC106328219	1.47	0.16	-3.19967	3.34e-05	Down	6.92e-06	cytochrome P450 71B2-like isoform X2 [Brassica oleracea var. oleracea]
	LOC106322586	164.49	26.9	-2.61232	0	Down	0	abscisic acid 8'-hydroxylase 3-like [Brassica oleracea var. oleracea]
	LOC106295900	13.66	2.26	-2.59556	9.41e-32	Down	3.54e-33	phytochromobilin:ferredoxin oxidoreductase, chloroplastic isoform X1 [Brassica oleracea var. oleracea]
	LOC106333784	1.62	0.28	-2.5325	2.75e-05	Down	5.62e-06	cytokinin hydroxylase-like [Brassica oleracea var. oleracea]
	LOC106300459	212.22	38.8	-2.45143	0	Down	0	chlorophyllide a oxygenase, chloroplastic-like [Brassica oleracea var. oleracea]
	LOC106316769	5.45	1.06	-2.36219	1.09e-15	Down	8.29e-17	cytochrome P450 94B1-like [Brassica oleracea var. oleracea]
	LOC106313822	3.91	0.88	-2.15159	3.79e-09	Down	4.75e-10	gibberellin 20 oxidase 3 [Brassica oleracea var. oleracea]
	LOC106321630	17.19	3.91	-2.13633	2.38e-59	Down	4.75e-61	methylenetetrahydrofolate reductase 1-like [Brassica oleracea var. oleracea]
	LOC106327302	5.49	1.58	-1.79688	4.57e-12	Down	4.44e-13	glutathione gamma-glutamylcysteinyltransferase 1-like isoform X1 [Brassica oleracea var. oleracea]
	LOC106336151	10.4	3.19	-1.70496	5.56e-27	Down	2.43e-28	acyl-coenzyme A oxidase 2, peroxisomal [Brassica oleracea var. oleracea]
	LOC106336369	1.51	0.47	-1.68382	7.19e-06	Down	1.34e-06	respiratory burst oxidase homolog protein C [Brassica oleracea var. oleracea]
	LOC106342200	54.4	17.2	-1.6612	1.1e-144	Down	8.5e-147	delta-1-pyrroline-5-carboxylate synthase B-like [Brassica oleracea var. oleracea]
	LOC106306537	8.03	2.55	-1.6549	3.24e-18	Down	2.11e-19	ferredoxin--nitrite reductase, chloroplastic [Brassica oleracea var. oleracea]
	LOC106334975	14.98	4.85	-1.62698	2.14e-26	Down	9.49e-28	cytochrome P450 72A15-like [Brassica oleracea var. oleracea]
	LOC106327716	1.67	0.58	-1.52572	0.000948	Down	0.000255	cytochrome P450 71B23-like [Brassica oleracea var. oleracea]
	LOC106336684	34.22	12.03	-1.5082	1.55e-54	Down	3.45e-56	abscisic acid 8'-hydroxylase 2-like isoform X2 [Brassica oleracea var. oleracea]
	LOC106318938	73.7	26.2	-1.4921	4e-129	Down	3.4e-131	ferredoxin--nitrite reductase, chloroplastic-like [Brassica rapa]
	LOC106301555	9.17	3.28	-1.48323	3.84e-15	Down	3.01e-16	ent-kaurene oxidase, chloroplastic [Brassica oleracea var. oleracea]
	LOC106335792	115.02	43.04	-1.41813	1.19e-91	Down	1.48e-93	probable peroxygenase 3 [Brassica oleracea var. oleracea]
	LOC106332027	6.19	2.38	-1.37898	1.36e-09	Down	1.65e-10	cytochrome P450 77A4-like [Brassica napus]
	LOC106337621	4.1	1.59	-1.3666	3.63e-06	Down	6.49e-07	abscisic acid 8'-hydroxylase 2 isoform X2 [Brassica oleracea var. oleracea]
	LOC106296243	26.28	10.95	-1.26303	1.57e-28	Down	6.52e-30	pyruvate dehydrogenase E1 component subunit alpha-2, mitochondrial-like isoform X2 [Brassica oleracea var. oleracea]
	LOC106321381	4.4	1.84	-1.2578	0.00012	Down	2.75e-05	cytochrome P450 72A15-like, partial [Brassica oleracea var. oleracea]
	LOC106331480	10.14	4.61	-1.13722	2.49e-08	Down	3.42e-09	peroxisomal (S)-2-hydroxy-acid oxidase GLO3-like isoform X1 [Brassica napus]
	LOC106306460	20.43	9.29	-1.13694	2.67e-11	Down	2.78e-12	peptide methionine sulfoxide reductase A4, chloroplastic-like [Brassica oleracea var. oleracea]
	LOC106336235	19.55	9.18	-1.0906	6.17e-23	Down	3.15e-24	15-cis-phytoene desaturase, chloroplastic/chromoplastic-like [Brassica oleracea var. oleracea]
	LOC106307115	8.69	4.09	-1.08726	7.69e-09	Down	9.95e-10	cytochrome P450 71B26-like [Brassica oleracea var. oleracea]
	LOC106334962	3.43	1.64	-1.06451	0.000129	Down	2.94e-05	CDX70494.1|//BnaC03g05780D [Brassica napus]
	LOC106320251	8.76	4.21	-1.05711	0.00078	Down	0.000206	monothiol glutaredoxin-S9-like [Brassica oleracea var. oleracea]
	LOC106317854	18.23	8.87	-1.03931	7.82e-43	Down	2.21e-44	indole-3-acetaldehyde oxidase [Brassica oleracea var. oleracea]
	LOC106330945	5.46	2.67	-1.03206	2.93e-06	Down	5.16e-07	cytochrome P450 79B1-like [Brassica oleracea var. oleracea]
	LOC106295907	198.27	96.98	-1.03171	1e-144	Down	7.7e-147	palmitoyl-monogalactosyldiacylglycerol delta-7 desaturase, chloroplastic-like [Brassica oleracea var. oleracea]
	LOC106296274	10.53	5.19	-1.0207	5.78e-12	Down	5.67e-13	alpha-dioxygenase 2-like [Brassica oleracea var. oleracea]
	LOC106341726	12105.2	6032.28	-1.00486	0	Down	0	chloroplast ribulose-1,5-bisphosphate carboxylase/oxygenase small subunit precursor [Brassica napus]
Notice: DEG indicated Differentially expressed genes.
