# Supplementary material for: BolTLP1, a Thaumatin-like Protein Gene, Confers Tolerance to Salt and Drought Stresses in Broccoli (Brassica oleracea L. var. Italica)
Source: Int J Mol Sci. 2021 Oct 15;22(20):11132. doi: 10.3390/ijms222011132 (PMC8537552; doi:10.3390/ijms222011132)
Supplement: Supplementary file 1 [file ijms-22-11132-s001.zip › Supplementary files/Supplementary Table S6.xlsx]

## Sheet: Sheet1
Supplementary Table S6 Genes containing a TLP domain identified in B. oleracea var. oleracea
Gene ID	Gene description	Protein sequence
XP_013583624	thaumatin-like protein (booTLP)	MASLNLFTFAFLLLISHASASTVVFLNKCRYPVWPGIQPSAGQNILAGGGFKLPANKAYTLQLPPLWSGRFWGRHGCTFDRSGRGRCATGDCGGSLTCNGAGGSPPATLAEITLGQELDFYDVSLVDGYNLAMSIMPVKGRGQCSYAGCVSDLNRMCPVGLQVRSRNGKRVLACKSACSAFNSPQYCCTGTFGNPLTCKPTSYSKIFKVACPKAYSYAYDDPTSIATCSKANYIVTFCPHHRR
XP_013588748	pathogenesis-related protein 5 (booPR5)	MANFSSALILLFVFITSSIAVSATVFTLQNSCPYTIWPGILSGNSNTLGDGGFPLTPGASKQLTAPQGWSGRFWPRTGCSFDFSGNGNCVTGDCGGVLKCIGGGVPPTTLAEFTVGTGVSGKDFYDVSLVDGYNVEMGIKPQGGSGDCKYAGCVADVNAVCPNELRIMDPKTGTVAACKSACAAFNSPEFCCTGAHATPQTCSPTRYSAVFKNACPSAYSYAYDDATSTFTCAGANYLITFCPTRS
XP_013589897	pathogenesis-related protein 5-like (booPR5)	MENLSTFHILFLVFITSGVAVSTTEFTLQNNCPYTVWPGTLTGNGGNILGDGGYQLNPGASVQLRAPPGWTGRFWARTGCNFDSSGNGKCVTGDCGGVLKCAGAGGVPPVTLAEFTVGEKDYYDVSLVDGYNVKMGIKPQGGFGDCDYAGCVSDLNMVCPNELRVMDPQNNVAACKSACAAFNKEEYCCTGAHSTPQTCSPTTYSMTFKKACPDAYSYAYDDETSTFTCAGANYLITFCATGS
XP_013590000	thaumatin-like protein (booTLP)	MRNEKLVHSLLVHLKSKEPPMASSISLFLLPLLLLLSHASEASTVIFYNKCTYTVWPGIQASSGQPLLGGGGFKLSPKRAYTLQLPSLWSGRFWGRHGCSFDRSGRGRCATGDCGGSLLCNGAGGVPPATLAEITLGHDQDFYDVSLVDGYNLAMSIMPVKGTGKCTYAGCVSDLNRMCPVGLQVRSRDGKQVVACKSACSAFNSPRYCCTGSFGNPQTCRPTAYSKIFKVACPKAYSYAYDDPTSIATCTKANYVVTFCPHRGR
XP_013590124	thaumatin-like protein (booTLP)	MGFRLNLPSRILLLHLTLLSVTTWSESARVFTIVNSCDQTIWPAITPGENFSGGGFKLKPGHSIVFKAPVDWSGRIWGRTGCKFDKTGTGSCETGSCGSNLKCSTSGKQPASLAEFTLSSVDFYDVSLVDGFNLPMTVNPVNGTGNCTVAGCVADLTLRCPAELAVKSKGRVISCRSACDVFDTDEYCCRGVYGNPSTCRPTHYSKIFKKACPTAYSYAYDDPTSIFTCSGSDYVISFCSYRKKPVGT
XP_013590324	thaumatin-like protein (booTLP)	MQSRFNLSPRILLLCLTLLSGTKWSDSARVFTIVNSCNQVVWPAITPGESFNGGGFELKPGQSMVFNAPVGWSGRIWGRTGCNFDKTGTGTCETGSCGSTLKCSASGKPPASLAEFTLATPDFYDVSLVDGFNLPMSVTPLNGKGNCSVAGCVADLRPKCPRELAVKSNGKVISCRSACDVFDKDEYCCRGVYGNPSTCRPTYYSKLFKEACPTSYSYAYDDPTSIFTCSGTDYVVSFCSAKKKPVCTYHDNKLVCSDGSGSSGFRTMIGGLWLVPLLSLVVFLTNVILPNL
XP_013590769	pathogenesis-related protein 5-like (booPR5)	MAGTHILFLVFITSSGIAGTATIFVLENSCPYTVWPGILSGNSTTTLGNGGVPLTPGASVQLTAPPGWSGRFCARTGCSFDASGRGSCVPGVCGGVLNCNRGGFPPAILAEFTVGSGDSEMDFYGVSLVDGFNVKMGIEPLGGTGDCHYAGCLADVNEICPGDLRIMDQNVVGVVAACMSACAAFDSPEFCCTGAHATPQTCGPSRYSTVFKNACPSAYSYAGDATSIFTCSRSNYLITFCPTRS
XP_013590803	pathogenesis-related protein 5-like (booPR5)	MQSRFNLSPRILLLCLTLLSGTKWSDSARVFTIVNSCNQVVWPAITPGESFNGGGFELKPGQSMVFNAPVGWSGRIWGRTGCNFDKTGTGTCETGSCGSTLKCSASGKPPASLAEFTLATPDFYDVSLVDGFNLPMSVTPLNGKGNCSVAGCVADLRPKCPRELAVK
XP_013591837	pathogenesis-related protein 5-like (booPR5)	MANLSSIHILLYFVFITNVIAVSATVITLQNSCPYTVWPGILSGNSNTLGDGGFPLTSGASVQLTAPPGWSGRFWARTGCSFDSSGHGNCVTGDCGGVLKCIGGGVPPTTLAEFTVGSGAYGKDFYDVSLVDGYNVEMGIKPHGGSGDCTYAGCVADVNSVCPSVLQIMDPRTGIVAACKSACAAFNAPEFCCTGAHATPQTCSPTHFSAVFKNACPSAYSYAYDDATSTFTCSGANYVITFCPTRS
XP_013592746	thaumatin-like protein 1b (booTLP1b)	MALALPLVVLVFWLLTGTESTSFIMENKCEYTVWPGLLSNAGVPPLPTTGFTLQKGEQRTITAPASWGGRFWGRTLCSTDTAGKFTCATGDCGSGTLECSGSGATPPATLAEFTLDGSGGLDFYDVSLVDGYNVPMLVVPQGGSGQNCSSTGCVVDLNGSCPSELRVTSVDGVRQSMGCKSACEAFRTPEYCCSGAFGTPDTCKPSEYSLVFKSACPRAYSYAYDDQSSTFTCAKSPNYVITFCPAPNTSQKSSQDQSPNSKPTTPPGTSTTPTGGSTTWTPEDTSMIYEGALDQSKASPSSYRLSLYGITVTLALAFCRMWWLF
XP_013594085	thaumatin-like protein 1b (booTLP1b)	MIITVLHSLVSFYFIIIPTLIFFHGSNGATITIVNRCSFTVWPGILPNSGSGDIGTTGFELASGGSRSFQAPASWSGRFWARTGCSFDSQTGQGTCLTGDCGSNQVECNGSGAKPPATLAEFTIGSGPEDPTRKQDFYDVSLVDGYNVPMVVEASGGSEGNCLTTGCVTDLNQRCPAELRFGSGSACKSACEAFGSPEYCCSGAYASPTECKPSMYSEIFKTACPRSYSYAFDDATSTFTCTSADYTITLCPYLPSQKSAANGWREGGGSAGSSQSPLSTWLSDVFSSGSSNLQSSIYLIIFSCIFLLLFLWRI
XP_013595016	pathogenesis-related protein 5-like (booPR5)	MVPMAVLVYVSLLFSVSYSSTFVITNNCPFTIWPGTLSGSGTRPLPTTGFRLDVGQSVKIPSVLGWSGRIWARTGCNFDANGAGKCVTGDCGGKLECAGNGAAPPTSLFEITLGHGSGDKDFYDAVDWLELVTLRDVLLISTLAVRRSFK
XP_013597596	thaumatin-like protein 1b (booTLP1b)	MGYSQNSLFVFLLLVLVYGVSSTTFTVVNQCSYTVWPGLLSGAGTAPLPTTGFSLNPTETRVIQIPAAWSGRIWGRTLCTQDATTGKFTCVTGDCGSSAVECSGSGAAPPATLAEFTLNGAGGLDFYDVSLVDGYNIPMAIVPQGGGDASGVAGNCTITGCVAELNGPCPAQLKVATTTGTADGVGCKSACEAFGTPEYCCSGAFGTPDTCKPSEYSLFFKNACPRAYSYAYDDGTSTFTCAGADYLITFCPSPNPSVKSAKKEGVLEPEAVSYSSASPTLSTVFSVGVLAVGVWALQRV
XP_013599384	thaumatin-like protein 1b (booTLP1b)	MIITLLHSPVSFCFIYMFSFLFFYGSNGATVTIVNRCSFTVWPGILANSGSSGLGTTGFELASGGSRSFQAPASWSGRFWARTGCNFDSQTGQFTCLTGDCGSNQVECNGSGAKPPATLAEFTIGSGPEDPTRKQDFYDVSLVDGYNVPMVVEPSGGTEGNCLTTGCVADLNQRCPPELRFGSGSACKSACEAFGSPEYCCSGAYASPTECKPSMYSEIFKSACPRSYSYAFDDATSTFTCTSADYTITLCPSLPSQKSAANGWREGGGLAESSPSPLSTWLSDVFTSDSSKIHISSQYLLIFSCIFLLFRQF
XP_013601340	thaumatin-like protein (booTLP)	MLRSGNGSASVIRDRMEENLASSSPKRNFWTFESSLSLSISAAAAHVHAPSSWYGIISGRTLCSNESRGNFSCATGDCESNKIEWPGSYGWSTVTYIYFRIDYSGTNSYFISLEYGYNLPVMVVPSHSSPTCFSSGCMVGLNKTCPNKLMIYDGIIPIACSSACKESSTHENC
XP_013603207	pathogenesis-related protein 5-like (booPR5)	MANFSGLHILFFSFIIATCAISVVSGTVFTIVNRCSFPVWPGILTGDNGVQLNGGGFALTPGASVDVAAPAGWSGRIWGRTGCNFDAFGTGSCLTGDCGNKLQCSGAGGVPPATLAEFTIGHGGAMDFYDVSLVDGYNVQMEIKTRGGSGDCQNVGCVSDLNKICPNELSVLNGGSVVACKSACEAFGTPQYCCTGAFNKAETCPPTDYSRIFKAACPKAYSYAYDDATSTFTCANANYSIIFCPTI
XP_013610198	thaumatin-like protein (booTLP)	MASYATLLLLFLTISASLSSSIDGTQLILVNNCQESIWPGILGGGGQTTPRNGGFHMESGEETIIDVPDKWSGRIWGRQGCTLNQNGKGGSCQTGDCNGGSLNCQGTGGVPPATVVEMTLGSSSSPLHFYDVSLVDGFNLPVSMKPIGGGVGCGVAACEVDLNVCCPSALEVKRDGKVVGCKSACLAMQSAKYCCTGEYANPKACKPTLYANLFKAICPKAYSYAFDDSSSLKTCRASRYVITFCPPK
XP_013614563	pathogenesis-related protein 5-like (booPR5)	MHLRFNLSPRILLLFLTLLSGTKWSESARVFTIANSCDQTIWPAITPGENFNGGGFELKPGQSIVFNAPVGWSGRIWGRTGCNFDKTGTGTCETGSCGSTLKCSASGKPPASLAEFTLAALDFYDVSLVDGFNLPMSVTPMNGKGNCSVAGCVADLRSKCPPELAVNSKGKVVSCRSACDVFDRDEYCCRGVYGNPVTCRPTNYSKMFKEACPTAYSYAYDDPTSIFTCSGTDYVISFCSSKKKPVCTYHDKKLACSDGSGSSGFRTMTGRLWLILMSLFAFIYS
XP_013617348	pathogenesis-related protein 5-like (booPR5)	MHLRFNLSPRILLLFLTLLSGTKWSESARVFTIVNSCDQTIWPAITPGENFNGGGFELKPGQSIVFNAPVGWSGRIWGRTGCNFDKTGTGTCETGSCGSTLKCSASGKPPASLAEFTLAALDFYDVSLVDGFNLPISVTPMNGKGNCSVAGCVADLRSKCPPELAVKSKGKVVSCRSACDVFDRDEYCCRGFYGNPVTCRPTYYSKMFKEACPTAYSYAYDDPTSIFTCSGTDYVISFCSSKKKPVCTYHDNKLACSDGSGSGGFRTMTGRFWLILSFFAFIYY
XP_013617976	thaumatin-like protein 1b (booTLP1b)	MAHRILLFVILLVSLSEVEPVSFKITNRCRNTIWPGFLSGATSPPLPTTGFRLSRGKSKSVTIPPSWSGRLWARTLCSRDPSSGSFSCLTADCGSGKVECSGSGAKPPATLAEFTLNGTGGLDFYDVSLVDGYNLPVLILPKKIVLGGCGATGCLVDLNGACPRDLKLVARGRRGGVACRSACEAFGDPRYCCSDAYATPDTCQPSVYSLFFKHACPRAYSYAYDDKTSTYTCATGADYVIIFCPPPYTSAKLLGSRKDGATLPLVNKSMIHLQ
XP_013619014	pathogenesis-related protein 5-like (booPR5)	MANLSSIHILFFAFITSGVAVSATVFTLENSCPYTVWPGILSGNTNTLGDGGFPLTPGASIQLNAPPGWSGRFWARTGCSFDSSGRGTCVTGDCGGALKCTGNGVPPATLAEFTVGSSNSGMDFYDVSLVDGYNVKMGIRPQGGSGDCRYAGCVSDINEICPSELRIMDPLNGGIVAACKSACAAFNSPEFCCTGAHATPQTCSPTQYSAMFKNACPTAYSYAYDDATSTFTCNGANYVITFCPSRS
XP_013620822	pathogenesis-related protein 5-like (booPR5)	MGRSLVPMAVLVYISLLFSVSYSSTFVITNNCPFTIWPGTLAGSGTPPLPTTGFKLDVGQSVSIPSAQGWSGRIWARTGCNFDANGTGKCTTGDCGGKLECAGSGAAPPTSLFEITLGRSPGDKDFYDVSLVDGYNLPIVAFPRGGGLVGACNATGCVADINVSCPKELQVMGEEEEERGGVVACKSACEAFGLDQYCCSGQFANPTTCRPSSYSTVFKRACPRAYSYAFDDGTSTFTCQASEYVIIFCPGRVTRPSSQNSDPPSPPQNPYGQQPMAPPTLNPYGQHPMAPPSQNPYGQPMAPPTQDPFGQPMAPPTQNPYGQPMAPPTQNQYGQPVSPVTQNLPGPSQNPNGESTTPPPHDQFMMPPPVVNQDPDDRFVNPPIVYESQRAETGKVGKT…
XP_013621161	thaumatin-like protein 1b (booTLP1b)	MALTLPLIFLLLSHFFFPGVEPTSFVMVNKCEYTVWPGLLSNAGVPPLPTTGFVLQKGEEQTIDAPASWGGRFWGRTLCSTDTDGKFSCATGDCGSGTLECSGSGATPPATLAEFTLDGSGGLDFYDVSLVDGYNVPMLVVPQGGSGQNCSSTGCVVDLNGSCPSELRVTSVDGAKQSMGCKSACEAFRTPEYCCSGAFGTPDTCKPSSYSLMFKNACPRAYSYAYDDQSSTFTCAKSPNYVITFCPSPNTSQKSSQDQSPDPKPTTPAGGITTWSPADTSMIYEGALDQSKASPSTSHLSLCGITVTLALAFCRMWWLF
XP_013621285	thaumatin-like protein 1 (booTLP1)	MIYQKTLLTVFFFAFITIYFVILADATTFTVRNNCPYVVWAATSAPGKPGGGKRLNQGETWIVTGDPGTTQARIWGRTNCNFDASGIGGCQTGDCNGVLECKSYGRAPNTLAEYSLKQYADQDFIDISVIDGFNIPMEFSSASGQCTRKIRCTGDIIAQCPAQLRMDGACNGPCPVLKTEEHCCNSGNCRPTPLSMFFKQRCPDAYSYPKDDPTSLFTCPSGTNYNVIFCP
XP_013623390	thaumatin-like protein 1b (booTLP1b)	MGQSQNSLFLFLLLVFIYGVSSTTFTVINQCSYTVWPGLLSGAGTAPLPTTGFSLNPTETRVIPIPAAWSGRIWGRTLCTQDAATGKFTCVTGDCGSSAVECSGSGAAPPATLAEFTLNGAGGLDFYDVSLVDGYNIPMTIVPQGGVSGNCTTTGCVAELNGPCPAQLKVATTGTEGVACKSACEAFGTPEYCCSGAFGTPDTCKPSEYSLFFKNACPRAYSYAYDDGTSTFTCGGADYVITFCPSPNPSVKSATKGGGLETEAVSYSAASPNASPTLSTTVSSIGVLVVAFRAVQRLW
XP_013627294	thaumatin-like protein (booTLP)	MSNNATLFLVFLTISAFLSSFIEGAQLILVNNCEESIWPGILGGGGQVTPKNGGFHMGSGEETIIDVPDKWSGRIWGRQGCTFDQNGKGSCQTGDCNAGSLSCQGTGGIPPATVVEMTLGSSSSPLHFYDVSLVDGFNLPVSMKPIGGGVGCGVAACEVDLNVCCPSALEVKRDGKVVGCKSACLAMQSAKYCCTGEYANPKACKPTLFANLFKAICPKAYSYAFDDSSSLNKCRASRYVITFCPPK
XP_013629616	thaumatin-like protein 1b (booTLP1b)	MDLTSLRGSSSLTLSFIVLLLASTGSYSSTFTFANRCGFTVWPGILANAGSPTLSTTGFELPKGTSRSLQAPTGWSGRFWARTGCSFDGSGSGTCKTGDCGSNQVECVGLGAAPPVTLAEFTLGTGGDDFYDVSLVDGYNLPMIVEVAGGSGQCASTGCTSDLNLQCPAELRSGDGDACKSACEAFRSPEYCCSGAYATPSTCRPSVYSEMFKAACPRSYSYAYDDATSTFTCAGGDYTVTFCPSSPSQKSTSYPTPVQDSSATSQGSDPVPGSDTGFSGQGQQQSQGQGQQQDQGTGSQVGTGETMLQDGSWMAGLAMGDSSRLTGASLAMPLAGFTFVFPFIFS
XP_013631757	osmotin-like protein(booOLP)	MAKTSLPLAASFLLLLISSAAAADAGRLFLTVVNHCPFTVWPAIQPNAGHPVLEKGGFALPTNTHRSFFPPSTHWSGRIWGRTGCSHYNGKFSCVTGDCGHRLECNGLGGATPASLAQFDLHHGGHQDLSSYGVSLVDGFNVPMTVTPHEGRGVCPVVGCREDLLKTCPAHLQLRSHGGHVVACKSGCEAFRTDELCCRNHYNSPQTCRASSHSLFFKHACPSTMTFAHDSPSLMHDCSSPRELKVIFCH
XP_013635008	thaumatin-like protein (booTLP)	MRIQSSSLFHLFIIWSCIVHGKVICHEVTFYVQNKCPFPIWPAVAPNSGHPVLASGGFYLPCGNTRRIDVPWGWNGRLWARTGCDFTSNWNQACETGDCDGSLECNGLIGKPPATLIQIAVQADKSKLNFYDVSLVDGYNLPVTVTSKPISSKCTIFGCHRDLKTTCPEELQVVNKEGRVVACKSACLAFDNDRFCCRNAYGTPEKCKKTTYSVLFKEACPSYYSYAYDTPPPLVTCSAKEYIITFCPSNWGHSST
